1           **Genotyping-by-sequencing and SNP-arrays are complementary for detecting**  
2           **quantitative trait loci by tagging different haplotypes in association studies**

3  
4       Sandra Silvia Negro<sup>1</sup>, Emilie Millet<sup>2,3</sup>, Delphine Madur<sup>1</sup>, Cyril Bauland<sup>1</sup>, Valérie Combes<sup>1</sup>,  
5       Claude Welcker<sup>2</sup>, François Tardieu<sup>2</sup>, Alain Charcosset<sup>1</sup>, Stéphane Dimitri Nicolas<sup>1</sup>

6  
7       Affiliations :

8       <sup>1</sup> GQE – Le Moulon, INRA, Univ. Paris-Sud, CNRS, AgroParisTech, Université Paris-Saclay,  
9       91190 Gif-sur-Yvette, France.

10      <sup>2</sup> Laboratoire d'Ecophysiologie des Plantes sous Stress Environnementaux (LEPSE),  
11      UMR759, INRA-SupAgro, 34060 Montpellier, France.

12  
13      <sup>3</sup> Present address: Biometris, Department of Plant Science, Wageningen University &  
14      Research, 6700 AA Wageningen, The Netherlands.

15  
16      E-mail addresses:

17      [sandras.negro@gmail.com](mailto:sandras.negro@gmail.com); [emilie.millet@wur.nl](mailto:emilie.millet@wur.nl); [delphine.madur@inra.fr](mailto:delphine.madur@inra.fr);

18      [cyril.bauland@inra.fr](mailto:cyril.bauland@inra.fr); [valerie.combes@inra.fr](mailto:valerie.combes@inra.fr); [claudewelcker@inra.fr](mailto:claudewelcker@inra.fr);

19      [francois.tardieu@inra.fr](mailto:francois.tardieu@inra.fr); [alain.charcosset@inra.fr](mailto:alain.charcosset@inra.fr); [stephane.nicolas@inra.fr](mailto:stephane.nicolas@inra.fr)

20      Corresponding author:

21      [stephane.nicolas@inra.fr](mailto:stephane.nicolas@inra.fr)

22

23        **Abstract**

24        **Background:** Single Nucleotide Polymorphism (SNP) array and re-sequencing technologies  
25        have different properties (*e.g.* calling rate, minor allele frequency profile) and drawbacks (*e.g.*  
26        ascertainment bias). This lead us to study their complementarity and the consequences of  
27        using them separately or combined in diversity analyses and Genome-Wide Association  
28        Studies (GWAS). We performed GWAS on three traits (grain yield, plant height and male  
29        flowering time) measured in 22 environments on a panel of 247 F1 hybrids obtained by  
30        crossing 247 diverse dent maize inbred lines with a same flint line. The 247 lines were  
31        genotyped using three genotyping technologies (Genotyping-By-Sequencing, Illumina  
32        Infinium 50K and Affymetrix Axiom 600K arrays).

33        **Results:** The effects of ascertainment bias of the 50K and 600K arrays were negligible for  
34        deciphering global genetic trends of diversity and for estimating relatedness in this panel. We  
35        developed an original approach based on linkage disequilibrium (LD) extent in order to  
36        determine whether SNPs significantly associated with a trait and that are physically linked  
37        should be considered as a single Quantitative Trait Locus (QTL) or several independent  
38        QTLs. Using this approach, we showed that the combination of the three technologies, which  
39        have different SNP distributions and densities, allowed us to detect more QTLs (gain in  
40        power) and potentially refine the localization of the causal polymorphisms (gain in  
41        resolution).

42        **Conclusions:** Conceptually different technologies are complementary for detecting QTLs by  
43        tagging different haplotypes in association studies. Considering LD, marker density and the  
44        combination of different technologies (SNP-arrays and re-sequencing), the genotypic data

45 available were most likely enough to well represent polymorphisms in the centromeric  
46 regions, whereas using more markers would be beneficial for telomeric regions.

47 **Keywords:** GWAS, linkage disequilibrium, genome coverage, maize, high-throughput  
48 genotyping technologies.

## 49 **Background**

50 Understanding the genetic bases of complex traits involved in the adaptation to biotic and  
51 abiotic stress in plants is a pressing concern, with world-wide drought due to climate change  
52 as a major source of human food and agriculture threats. Recent progress in next generation  
53 sequencing and genotyping array technologies contribute to a better understanding of the  
54 genetic basis of quantitative trait variation by allowing Genome-Wide Association Studies  
55 (GWAS) on large diversity panels [1]. Single Nucleotide Polymorphism (SNP)-based  
56 techniques became the most commonly used genotyping methods for GWAS because SNPs  
57 are cheap, numerous, codominant and can be automatically analysed with SNP-arrays or  
58 produced by genotyping-by-sequencing (GBS), or sequencing [2-4]. The decreasing cost of  
59 genotyping technologies has led to an exponential increase in the number of markers used for  
60 the GWAS in association panels, thereby raising the question of computation time to perform  
61 the association tests. Computational issues were addressed by using either approximate  
62 methods by avoiding re-estimating variance components for each SNP [5] or exact methods  
63 using mathematical tools for sparing time in matrix inversion [6, 7]. It is noteworthy that  
64 using approximate computation in GWAS can produce inaccurate p-values when the SNP  
65 effect size is large or/and when the sample structure is strong [8].

66 Several causes may impact the power of Quantitative Trait Locus (QTL, locus involved in  
67 quantitative trait variation) detection in GWAS. Highly diverse panels have in general

68 undergone multiple historical recombinations, leading to a low extent of linkage  
69 disequilibrium (LD). However, these panels can present different average and local patterns of  
70 LD [9-11]. A high marker density and a proper distribution of SNPs are therefore essential to  
71 capture causal polymorphisms. Furthermore, minor allele frequencies (MAF), population  
72 stratification and cryptic relatedness are three other important parameters affecting power and  
73 false positive detection [12, 14]. These last two factors are substantial in several cultivated  
74 species such as maize [15] and grapevine [16], and their impact on LD can be statistically  
75 evaluated [17]. Population structure and kinship can be estimated using molecular markers  
76 [18-21] and can be modelled to efficiently detect marker-trait associations due to linkage only  
77 [12, 22, 23]. These advances have largely increased the power and effectiveness of linear  
78 mixed models that can now efficiently account for population structure and relatedness in  
79 GWAS [8, 12].

80

81 In maize, an Illumina Infinium HD 50,000 SNP-array, named MaizeSNP50 (hereafter 50K)  
82 was developed by Ganai *et al.* [3] and has been used extensively for diversity and association  
83 studies [24, 25]. For example, GWAS were conducted to unravel the genetic architecture of  
84 phenology, yield component traits and to identify several flowering time QTLs linked to  
85 adaptation of tropical maize to temperate climate [26, 27]. In the same way, Rincent *et al.* [11]  
86 showed that LD occurs over a longer distance in a dent than in a flint panel, with appreciable  
87 effects on the power of QTL detection. Low LD extent and relationship between allelic  
88 frequencies with population and pedigree structure at some SNPs reduce the power of GWAS  
89 [14, 27]. Therefore, higher marker densities are desirable because the maize genome size is  
90 large (2.4 Gb), the level of diversity is high (more than one substitution per hundred  
91 nucleotides), and LD extent is low [28]. As a consequence, an Affymetrix Axiom 600,000

92 SNP-array (hereafter 600K) was developed and used in association genetics [29, 30] and  
93 detection of selective sweeps [4]. Another possibility is whole genome sequencing, but this is  
94 currently impractical for large genomes such as maize because of the associated cost. Hence, a  
95 Genotyping-By-Sequencing (GBS) procedure has been developed [2] that targets low-copy  
96 genomic regions by using restriction enzymes. Genotyping-by-sequencing technology is cost-  
97 effective and has been successfully used in maize for genomic prediction [31]. Romay *et al.*  
98 [32] and Gouesnard *et al.* [33] highlighted the interest of the GBS for (i) deciphering and  
99 comparing the genetic diversity of the inbred lines in seedbanks and (ii) identifying QTLs by  
100 GWAS for kernel colour, sweet corn and flowering time.

101

102 Few studies in plants have compared datasets from different high-throughput genotyping  
103 technologies [34-36]. Elbasyoni *et al.* [34] used GBS and a 90K SNP-array in winter wheat.  
104 They highlighted strong positive correlations between the population structure matrices and  
105 kinships identified by both technologies. They showed that GBS-SNPs led to higher genomic  
106 prediction accuracy compared to Array-SNPs. Torkamaneh and Belzile [36] used GBS and a  
107 50K SNP-array in soybean. They estimated *ca.* 98% accuracy of genotype called by their  
108 GBS pipeline and showed that the accuracy of imputation for missing genotypes was hardly  
109 affected by the chosen the MAF and only moderately affected by the rate of missing values.  
110 Li *et al.* [35] created a reliable integrated variation map using a 600K and 50K SNP-array,  
111 GBS and RNA sequencing to dissect regulatory causality and its link to maize kernel  
112 variation. These authors used a fixed physical distance (<10 kb) for grouping associated SNPs  
113 into QTLs despite the variable LD pattern along the genome. None of these studies compared  
114 QTL detection between the different technologies.

115

116 The main drawback of the DNA arrays is that they do not allow the discovery of new SNPs.  
117 This possibly leads to some ascertainment bias in diversity analysis when the SNPs selected  
118 for building arrays come from (i) the sequencing of a set of individuals that did not represent  
119 well the diversity explored in the studied panel, (ii) a subset of SNPs that skews the allelic  
120 frequency profile towards the intermediate frequencies [27, 37]. Ascertainment bias can  
121 compromise the ability of the SNP-arrays to reveal an exact view of the genetic diversity [37].  
122 Genotyping-by-sequencing can overcome ascertainment bias since it is based on sequencing  
123 and therefore allows the discovery of alleles in the diversity panel analysed. It can be  
124 generalized to any species at a low cost providing that numerous individuals have been  
125 sequenced in order to build a representative library of short haplotypes to call SNPs [38].  
126 Non-repetitive regions of genomes can be targeted with two- to three-fold higher efficiency,  
127 thereby considerably reducing the computationally challenging problems associated with  
128 alignment in species with high repeat content. However, GBS may have low coverage leading  
129 to a high missing data rate (65% in both studies; [32, 33]) and heterozygote under-calling,  
130 depending on genome size and structure, and on the multiplexing level per sequencing flow-  
131 cell. Furthermore, GBS requires the establishment of demanding bioinformatic pipelines and  
132 imputation algorithms [39]. Pipelines have been developed to call SNP genotypes from raw  
133 GBS sequence data and to impute the missing data from a haplotype library [38, 39].  
134 Here, we investigated the impact of using GBS and SNP-arrays on the quality of the  
135 genotyping data, together with the biological properties of data generated by each technology,  
136 and the potential complementarity of these approaches. In particular, we analyzed the impact  
137 of marker density and genotyping technologies (sequencing *vs* array) on (i) the estimates of  
138 relatedness and population structure, and (ii) the detection of QTLs (power). To address these  
139 issues, we performed a GWAS based on genotypic datasets obtained using either GBS or

140 SNP-arrays with low (50k) or high (600k) densities on a diversity panel of maize hybrids  
141 obtained by crossing a panel of dent lines with a common flint tester lines. Three traits were  
142 considered, namely grain yield, plant height and male flowering time (day to anthesis),  
143 measured in 22 different environments (sites  $\times$  years  $\times$  treatments) over Europe. We  
144 developed an original approach based on LD extent in order to determine whether SNPs  
145 significantly associated with a trait should be considered as a single QTL or several  
146 independent QTLs.

147

## 148 **Results**

### **Combining Tassel and Beagle imputations improved the genotyping quality for GBS**

149 We estimated the genotyping and imputation concordance of the GBS based on common  
150 markers with the 50K or 600K arrays (Additional file 1: Figure S1 and Table 1). The  
151 genotyping concordance of the 600K with the 50K was extremely high (99.50%), although  
152 slightly lower for residual heterozygotes (92.88%). After SNP calling from sequencing reads  
153 using AllZeaGBSv2.7 database (direct reads, GBS<sub>1</sub>, Additional file 1: Figure S1), the call rate  
154 was 33.81% for the common SNPs with the 50K, vs 37% for the whole GBS dataset. The  
155 genotyping concordance rate between the direct reads of GBS and the 50K was 98.88%  
156 (Table 1). After imputation using *TASSEL* by Cornell Institute (GBS<sub>2</sub>), the concordance rate  
157 was 96.04% on the common markers with the 50K and 11.91% of missing data remained for  
158 the whole GBS dataset. In GBS<sub>3</sub>, all missing data were imputed by *Beagle* and the remaining  
159 missing genotypes in GBS<sub>2</sub> were excluded here to be comparable with *TASSEL*. This method  
160 yielded a lower concordance rate (93.04% and 92.84% with 50K and 600K, respectively). In

161 an attempt to increase the concordance rate of the genotyping while removing missing data,  
 162 we tested two additional methods, namely GBS<sub>4</sub> where the missing data and heterozygotes of  
 163 Cornell imputed data (GBS<sub>2</sub>) were replaced by Beagle imputation, and GBS<sub>5</sub> where Cornell  
 164 homozygous genotypes (GBS<sub>2</sub>) were completed by imputations from GBS<sub>3</sub> (Additional file 1:  
 165 Figure S1 and Table 1). GBS<sub>5</sub> displayed a slightly better concordance rate than GBS<sub>2</sub> (96.25%  
 166 vs 96.04%) and predicted heterozygotes with a higher quality than GBS<sub>4</sub>. GBS<sub>5</sub> was therefore  
 167 used for all genetic analyses and named GBS hereafter.

168 **Table 1:** Percentage of GBS concordance and call rates (in parentheses).

|                                                                                                                                                         | Reference | Total          | Homozygotes    | Heterozygotes |
|---------------------------------------------------------------------------------------------------------------------------------------------------------|-----------|----------------|----------------|---------------|
| GBS <sub>1</sub> Direct Read                                                                                                                            | 50K       | 98.88 (33.81)  | 99.03 (33.72)  | 45.09 (0.09)  |
|                                                                                                                                                         | 600K      | 98.99 (35.58)  | 99.21 (35.47)  | 28.67 (0.11)  |
| GBS <sub>2</sub> Cornell Imputation                                                                                                                     | 50K       | 96.04 (91.56)  | 98.66 (88.79)  | 12.51 (2.78)  |
|                                                                                                                                                         | 600K      | 95.50 (93.41)  | 98.69 (90.14)  | 7.75 (3.28)   |
| GBS <sub>3</sub> Beagle Imputation                                                                                                                      | 50K       | 93.04 (*91.56) | 93.23 (91.30)  | 30.54 (0.26)  |
|                                                                                                                                                         | 600K      | 92.84 (*93.41) | 93.07 (93.12)  | 22.50 (0.29)  |
| GBS <sub>4</sub> Beagle Imputation on the missing data and heterozygotes after Tassel Imputation (GBS <sub>2</sub> )                                    | 50K       | 96.46 (*97.64) | 96.46 (97.63)  | <0.01 (<0.01) |
|                                                                                                                                                         | 600K      | 96.21 (*99.97) | 96.21 (>99.99) | <0.01 (<0.01) |
| GBS <sub>5</sub> Compilation of Homoz. genotypes from Tassel Imputation (GBS <sub>2</sub> ) and Imputation by Beagle for Other Data (GBS <sub>3</sub> ) | 50K       | 96.25 (*97.65) | 96.36 (97.47)  | 39.07 (0.18)  |
|                                                                                                                                                         | 600K      | 95.98 (*99.97) | 96.11 (99.78)  | 32.02 (0.22)  |

169 The 50K and 600K SNP-arrays were considered as reference genotypes. \* After Beagle  
 170 inference of missing data, the call rate was 100%. Here the call rate is <100% because the  
 171 comparison was made against the 50K and the 600K that include few missing data. For GBS<sub>3</sub>,  
 172 the remaining missing genotypes in GBS<sub>2</sub> were also excluded to obtain comparable results.  
 173

### GBS displayed more rare alleles and lower call rate than SNP-arrays

174 The SNP call rate was higher for the SNP-arrays (average values of 96% and >99% for the  
 175 50K and 600K, respectively), than for the GBS (37% for the direct reads). The MAF



176 distribution differed between the technologies (Additional file 2: Figure S2): while the use of  
177 SNP-arrays resulted in a near-uniform distribution, GBS resulted in an excess of rare alleles  
178 with a L-shaped distribution (22% of SNPs with MAF < 0.05 for the GBS *versus* 6% and 9%  
179 for the 50K and 600K, respectively). This can be explained by the fact that the 50K was based  
180 on 27 sequenced lines for SNPs discovery [3], the 600K was based on 30 lines [4], whereas  
181 GBS was based on 31,978 lines, thereby leading to higher discovery of rare alleles. Consistent  
182 with MAF distribution, the average gene diversity ( $H_e$ ) was lower for GBS (0.27) than for  
183 arrays (0.35 and 0.34 for the 50K and 600K arrays, respectively). The distribution of SNP  
184 residual heterozygosity of inbred lines was similar for the three technologies, with a mean of  
185 0.80%, 0.89% and 0.22 % for the 50K, 600K and GBS, respectively. The residual  
186 heterozygosity of inbred lines was highly correlated between technologies with large  
187 coefficients of Spearman correlation:  $r_{50K-600K} = 0.90$ ,  $r_{50K-GBS} = 0.76$ ,  $r_{600K-GBS} = 0.83$ . The  
188 distribution of the SNPs along the genome was denser in the telomeres for the GBS and in the  
189 peri-centromeric regions for the 600K, whereas the 50K exhibited a more uniform distribution  
190 (Figure 1 and top graph in Additional file 3: Figure S3).

### **Population structure and relatedness were consistent between the three technologies**

191 We used the ADMIXTURE software to analyse the genetic structure within the studied panel  
192 based on SNPs from the three technologies, by considering two to ten groups. Based on a K-  
193 fold cross-validation, the clustering in four genetic groups ( $N_G = 4$ ) was identified as the best  
194 for the three datasets. Considering a threshold of 0.5 for ancestral fraction, the assignment to  
195 the four groups was identical except for a few admixed inbred lines (Additional file 4: Figure  
196 S4). Based on the 50K, the four groups were constituted by (i) 39 lines in the Non Stiff Stalk

197 (Iodent) family traced by PH207, (ii) 46 lines in the Lancaster family traced by Mo17 and  
198 Oh43, and (iii) 55 lines in theStiff Stalk family traced by B73 and (iv) 107 lines that did not  
199 fit into these three primary heterotic groups, such as W117 and F7057. This organization  
200 appeared consistent with the organization of breeding programs into heterotic groups,  
201 generally related to few key founder lines.

202

203 We compared two estimators of relatedness between inbred lines, IBS (Identity-By-State) and  
204  $K\_Freq$  (Identity-By-Descent), calculated per technology. For IBS, pairs of individuals were  
205 on average more related using GBS than SNP-arrays (mean IBS: 0.66, 0.67 and 0.73 for 50K,  
206 600K and GBS, respectively). As expected, mean IBD was close for the three technologies  
207 ( $K\_Freq$ : -0.004). Relatedness estimates with the two SNP-arrays were highly correlated:  $r =$   
208 0.95 and 0.98 for IBS and  $K\_Freq$ , respectively (Additional file 5: Figure S5b and d).  
209 Likewise, relatedness estimates between arrays and GBS were strongly correlated (between  
210 0.94 and 0.98, Additional file 5: Figure S5b and d)..

211

212 We further carried out diversity analyses by performing Principal Coordinate Analyses  
213 (PCoA) on IBD ( $K\_Freq$ , weights by allelic frequency) estimated from the three technologies  
214 (Figure 2). The three first PCoA axes explained 12.9%, 15.6% and 16.3% of the variability for  
215 the GBS, 50K and 600K, respectively (Figure 2). The same pattern was observed regardless  
216 of the technology with the first axis separating the Stiff Stalk from all other groups (Iodent  
217 and Lancaster lines, see illustration with the 50K kinship, Figure 2). Key founder lines of the  
218 three heterotic groups (Iodent: PH207, Stiff Stalk: B73, Lancaster: Mo17) were found at  
219 extreme positions along the axes, which was consistent with the admixture groups previously  
220 described.

## **Long distance linkage disequilibrium was removed by taking into account population structure or relatedness**

221 In order to evaluate the effect of kinship and the genetic structure on linkage disequilibrium  
222 (LD), we studied genome-wide LD between 29,257 PANZEA markers from the 50K within  
223 and between chromosomes before and after taking into account the kinship ( $K\_Freq$  estimated  
224 from the 50K), structure (Number of groups = 4) or both (Additional file 6: Figure S6).  
225 Whereas inter-chromosomal LD was only partially removed when the genetic structure was  
226 taken into account, it was mostly removed when either the kinship or both kinship and  
227 structure were considered (Additional file 6: Figure S6b and c). Accordingly, long distance  
228 intra-chromosomal LD was almost totally removed for all chromosomes by accounting for the  
229 kinship, structure or both. Interestingly, some pairs of loci located on different chromosomes  
230 or very distant on a same chromosome remained in high LD despite correction for genetic  
231 structure and kinship (Additional file 6: Figure S6). This can be explained either by genome  
232 assembly errors, by chromosomal rearrangements such as translocations or by strong epistatic  
233 interactions. Linkage disequilibrium decreased with genetic or physical distance Figure 3. The  
234 majority of pairs of loci with high LD ( $r^2K > 0.4$ ) in spite of long physical distance ( $> 30\text{Mbp}$ ),  
235 were close genetically ( $< 3\text{cM}$ ), notably on chromosome 3, 5, 7 and to a lesser extent 9 and 10  
236 (data not shown). These loci were located in centromeric and peri-centromeric regions that  
237 displayed low recombination rate, suggesting that this pattern was due to variation of  
238 recombination rate along the chromosome. Only very few pairs of loci in high LD were  
239 genetically distant ( $> 5\text{cM}$ ) but physically close ( $< 2\text{Mbp}$ ). Linkage disequilibrium ( $r^2K$  and  
240  $r^2KS$ ) was negligible beyond 1 cM since 99% of LD values were less than 0.12 in this case.  
241 Note that some unplaced SNPs remained in LD after taking into account the kinship and  
242 structure with some SNPs with known positions on chromosome 1, 3 and 4 (Additional File 6:

243 Figure S6). Therefore, LD measurement corrected by the kinship can help to map unplaced  
 244 SNPs.

### Linkage disequilibrium strongly differed between and within chromosomes

245 We combined the three technologies together to calculate the  $r^2K$  for all pairs of SNPs which  
 246 were genetically distant by less than 1 cM. For any chromosome region, LD extent in terms of  
 247 genetic and physical distance showed a limited variation over the 100 sets of 500,000 loci  
 248 pairs (cf. Material). This suggests that the estimation of LD extent did not strongly depend on  
 249 our set of loci. LD extent varied significantly between chromosomes for both high  
 250 recombinogenic (>0.5 cM/Mbp) and low recombinogenic regions (<0.5 cM/Mbp, Table 2).  
 251 Chromosome 1 had the highest LD extent in high recombination regions ( $0.062 \pm 0.007$  cM)  
 252 and chromosome 9 the highest LD extent in low recombinogenic regions ( $898.6 \pm 21.7$  kbp)  
 253 (Table 2). Linkage disequilibrium extent relative to genetic and physical distances was highly  
 254 and positively correlated in high recombinogenic regions ( $r = 0.86$ ), whereas it was not in low  
 255 recombinogenic regions ( $r = -0.64$ ).

256

257 **Table 2:** Variation of LD extent, and percentage of genome covered.

|                                                       |      | Chromosome |       |       |       |       |       |       |       |       |       | Whole Genome |
|-------------------------------------------------------|------|------------|-------|-------|-------|-------|-------|-------|-------|-------|-------|--------------|
|                                                       |      | 1          | 2     | 3     | 4     | 5     | 6     | 7     | 8     | 9     | 10    |              |
| Physical Size (Mbp)                                   |      | 301        | 237   | 232   | 241   | 217   | 169   | 176   | 175   | 156   | 150   | 2,058        |
| Genetic Size (cM)                                     |      | 268        | 211   | 188   | 150   | 205   | 129   | 148   | 182   | 145   | 139   | 1766         |
| Physical LD extent (kbp) in low recombination regions |      | 306        | 491   | 846   | 808   | 658   | 418   | 547   | 497   | 899   | 815   | 629          |
| Genetic LD Extent (cM) in high recombination regions  |      | 0.062      | 0.027 | 0.033 | 0.022 | 0.031 | 0.019 | 0.012 | 0.038 | 0.023 | 0.019 | 0.029        |
| Percent of physical genome covered                    | 50K  | 81%        | 72%   | 76%   | 77%   | 74%   | 67%   | 71%   | 73%   | 71%   | 71%   | 74%          |
|                                                       | 600K | 98%        | 88%   | 91%   | 89%   | 90%   | 84%   | 81%   | 90%   | 87%   | 84%   | 89%          |
|                                                       | GBS  | 92%        | 81%   | 84%   | 83%   | 83%   | 77%   | 77%   | 81%   | 79%   | 76%   | 82%          |
|                                                       | ALL  | 98%        | 90%   | 92%   | 90%   | 91%   | 87%   | 83%   | 92%   | 88%   | 85%   | 90%          |

|                                |      |     |     |     |     |     |     |     |     |     |     |     |
|--------------------------------|------|-----|-----|-----|-----|-----|-----|-----|-----|-----|-----|-----|
| Percent of genetic map covered | 50K  | 72% | 41% | 44% | 38% | 41% | 32% | 24% | 46% | 32% | 27% | 42% |
|                                | 600K | 96% | 71% | 76% | 68% | 72% | 62% | 47% | 78% | 63% | 53% | 71% |
|                                | GBS  | 86% | 58% | 61% | 53% | 61% | 48% | 37% | 63% | 48% | 40% | 58% |
|                                | ALL  | 97% | 74% | 78% | 72% | 74% | 65% | 51% | 81% | 66% | 57% | 74% |

258 Genetic and Physical LD extent were obtained by adjusting Hill and Weir model's on 100  
 259 different sets of 500,000 loci randomly sampled in high ( $>0.5$  cM / Mbp) and low ( $<0.5$  cM /  
 260 Mbp) recombination regions, respectively. The value represented the average across these 100  
 261 sets. The percentage of genome coverage was estimated using markers with  $MAF > 5\%$  and  
 262  $E(r^2k) = 0.1$ , for each technology and for the three technologies combined (ALL:  
 263 GBS+600K+50K).

265

266 Large differences in genome coverage between technologies

267 We estimated the percentage of the genome that was covered by LD windows around SNPs,  
 268 calculated by using either physical or genetic distances (Figure 3, Table 2). We observed a  
 269 strong difference in coverage between the three technologies at both genome-wide and  
 270 chromosome scale, as illustrated in Figure 1 on chromosome 3 (Table 2, and Additional file  
 271 3: Figure S3). For a LD extent of  $r^2K = 0.1$ , 74%, 82% and 89% of the physical map, and  
 272 42%, 58% and 71% of the genetic map were covered by the 50K, the GBS and the 600K,  
 273 respectively (Table 2). For the combined data (ALL: 50K + 600K + GBS), the coverage  
 274 strongly varied between chromosomes, ranging from 83% (chromosome 7) to 98%  
 275 (chromosome 1) of the physical map, and from 51% (chromosome 7) to 97% (chromosome 1)  
 276 of the genetic map (Table 2). For the physical map, increasing the LD extent threshold to  
 277  $r^2K=0.4$  reduced the genome coverage from 89% to 49% for 600K, 82% to 28% for GBS,  
 278 74% to 20% for 50K and 90% to 52% for the combined data. Increasing the MAF threshold  
 279 reduced slightly the genome coverage, with smaller reduction for the physical map than  
 280 genetic map. Surprisingly, increasing the SNP number by combining the markers from the  
 281 arrays and GBS did not strongly increase the genome coverage as compared to the 600K,

282 regardless of the threshold for LD extent (Figure 1 and Additional file 3: Figure S3).  
283 We observed a strong variation of genome coverage along each chromosome with contrasted  
284 patterns in low and high recombinogenic regions (Figure 1 Additional file 3: Figure S3).  
285 While low recombinogenic regions were totally covered with all the technologies (except for  
286 few intervals using the 50K), the genome coverage in high recombinogenic regions varied  
287 depending on both technology and SNP distribution. 47% of the 2Mbp intervals in high  
288 recombination regions were better covered by the 600K than the GBS against only 1%, which  
289 were better covered by GBS than 600K. When exploring smaller window sizes (20, 100, 500  
290 kb), the number of intervals better covered by 600K than GBS decreased strongly when the  
291 intervals were shortened (17.1% of 20kbp-intervals vs 47.1% of 2Mbp-intervals). In the  
292 contrary, the intervals better covered by GBS than 600K increased slightly (4.1% vs 1.1% of  
293 2Mbp-intervals). The number of interval with no or weak coverage differences between GBS  
294 and 600K increased strongly: 84.5% of 20kbp-intervals vs 68% of 2Mbp-intervals with  
295 coverage differences inferior to 10%. Interestingly, the proportion of interval with strong  
296 coverage differences (>50%) increased when the intervals were shortened (7.8% of 20kbp-  
297 intervals vs 0% of 2Mbp-intervals).  
298

### **Number of QTLs detected using genome-wide association studies increases with markers density**

299 We observed a strong variation in the number of SNP significantly associated with the three  
300 traits across the 22 environments (Table 3). The mean number of significant SNPs per  
301 environment and trait was 3.7, 44.7, 17.9 and 62.4 for the 50K, 600K, GBS and the three  
302 technologies combined, respectively (Table 4). Considering the p-value threshold used, 28,

303 303 and 204 false positives were expected among the 243, 2,953 and 1,182 associations  
 304 detected for 50K, 600K and GBS, respectively. False discovery rate appeared therefore higher  
 305 for GBS (17.2%) than for DNA arrays (11.5% and 10.2% for 50K and 600K, respectively). It  
 306 could be explained by the higher genotyping error rate of GBS due to imputation and/or by its  
 307 higher number of markers with a low MAF. Both reduce the power of GBS compared to DNA  
 308 arrays and therefore lead to a higher false discovery rate. Proportionally to the SNP number,  
 309 the 50K and 600K resulted in 1.5- and 1.7-fold more associated SNPs per situation  
 310 (environment  $\times$  trait) than GBS ( $p$ -value $<2 \times 10^{-6}$ , Table 4). This difference between SNP-  
 311 arrays and GBS was higher for grain yield (GY) and plant height (plantHT) than for male  
 312 flowering time (DTA, Table 4).  
 313

314 **Table 3:** Number of significant SNPs per environment, per technology and for the combined  
 315 technologies.

| Env.   | Flowering Time |     |      |     |     | Plant Height |     |      |     |     | Grain Yield |     |      |     |     |
|--------|----------------|-----|------|-----|-----|--------------|-----|------|-----|-----|-------------|-----|------|-----|-----|
|        | Herit.         | 50K | 600K | GBS | ALL | Herit.       | 50K | 600K | GBS | ALL | Herit.      | 50K | 600K | GBS | ALL |
| Cam12R | 0.40           | 0   | 3    | 1   | 4   | 0.57         | 23  | 209  | 88  | 289 | 0.37        | 21  | 286  | 102 | 381 |
| Cam12W | 0.60           | 1   | 18   | 13  | 31  | 0.39         | 22  | 270  | 72  | 339 | 0.54        | 41  | 525  | 167 | 684 |
| Cam13R | 0.46           | 0   | 9    | 7   | 16  | 0.21         | 0   | 2    | 3   | 5   | 0.19        | 0   | 1    | 3   | 4   |
| Cra12R | 0.69           | 1   | 40   | 18  | 59  | 0.32         | 0   | 6    | 3   | 9   | 0.25        | 3   | 57   | 45  | 103 |
| Cra12W | 0.72           | 3   | 25   | 19  | 43  | 0.19         | 10  | 69   | 16  | 83  | 0.53        | 12  | 98   | 53  | 150 |
| Deb12R | 0.63           | 1   | 14   | 16  | 30  | 0.33         | 0   | 1    | 0   | 1   | 0.57        | 2   | 14   | 0   | 16  |
| Deb12W | 0.71           | 0   | 25   | 38  | 61  | 0.37         | 0   | 6    | 7   | 7   | 0.47        | 0   | 6    | 2   | 8   |
| Deb13R | 0.59           | 1   | 17   | 5   | 23  | 0.08         | 0   | 33   | 9   | 42  | 0.37        | 1   | 22   | 15  | 37  |
| Gai12R | 0.64           | 8   | 80   | 24  | 104 | 0.18         | 1   | 47   | 41  | 89  | 0.31        | 0   | 23   | 8   | 31  |
| Gai12W | 0.66           | 5   | 42   | 15  | 59  | 0.46         | 0   | 1    | 3   | 4   | 0.58        | 3   | 71   | 14  | 85  |
| Gai13R | 0.62           | 0   | 24   | 8   | 31  | 0.66         | 0   | 6    | 6   | 11  | 0.63        | 0   | 4    | 5   | 9   |
| Gai13W | 0.73           | 1   | 45   | 9   | 54  | 0.33         | 0   | 1    | 3   | 4   | 0.76        | 2   | 7    | 1   | 9   |
| Kar12R | 0.72           | 4   | 30   | 21  | 52  | 0.30         | 0   | 4    | 3   | 7   | 0.71        | 0   | 5    | 6   | 11  |
| Kar12W | 0.77           | 8   | 60   | 10  | 73  | 0.23         | 1   | 10   | 4   | 14  | 0.53        | 2   | 19   | 11  | 29  |
| Kar13R | 0.68           | 3   | 65   | 11  | 77  | 0.31         | 0   | 4    | 2   | 6   | 0.75        | 4   | 37   | 24  | 62  |
| Kar13W | 0.73           | 0   | 17   | 12  | 29  | 0.26         | 0   | 2    | 7   | 9   | 0.67        | 4   | 12   | 6   | 19  |
| Mur13R | 0.83           | 3   | 48   | 19  | 68  | 0.32         | 7   | 61   | 7   | 68  | 0.84        | 14  | 90   | 28  | 116 |
| Mur13W | 0.76           | 0   | 11   | 8   | 19  | 0.32         | 3   | 4    | 2   | 9   | 0.74        | 10  | 80   | 25  | 104 |
| Ner12R | 0.72           | 7   | 23   | 18  | 45  | 0.34         | 0   | 7    | 3   | 10  | 0.54        | 1   | 10   | 6   | 16  |



|         |      |     |      |      |      |      |     |      |      |      |      |     |       |      |       |
|---------|------|-----|------|------|------|------|-----|------|------|------|------|-----|-------|------|-------|
| Ner12W  | 0.81 | 1   | 80   | 30   | 107  | 0.24 | 0   | 2    | 2    | 4    | 0.59 | 1   | 8     | 6    | 15    |
| Ner13R  | 0.76 | 3   | 60   | 26   | 88   | 0.26 | 1   | 25   | 13   | 38   | 0.32 | 0   | 13    | 7    | 20    |
| Ner13W  | 0.81 | 2   | 23   | 17   | 42   | 0.20 | 0   | 8    | 5    | 13   | 0.73 | 2   | 28    | 4    | 32    |
| Average | 0.68 | 2.4 | 34.5 | 15.7 | 50.7 | 0.31 | 3.1 | 35.4 | 13.6 | 48.2 | 0.55 | 5.6 | 64.4  | 24.5 | 88.2  |
| Median  | 0.71 | 1   | 25   | 15.5 | 47.5 | 0.32 | 0   | 6    | 4.5  | 9.5  | 0.56 | 2   | 20.5  | 7.5  | 30    |
| SD      | 0.11 | 2.6 | 22.7 | 8.7  | 27.7 | 0.13 | 6.8 | 69.6 | 23.2 | 90.2 | 0.18 | 9.6 | 120.1 | 39.5 | 156.8 |

316 The average, median and standard deviation (SD) per environment are calculated for each  
 317 trait (male Flowering Time, Plant Height, Grain Yield). “Herit.”: narrow sense heritability.  
 318 “Env.” : Environment.

319

320 **Table 4:** Comparison of associated SNPs and QTLs detected between traits and three  
 321 technologies.

| Technology              |           | Significant SNPs |        |        |        | QTLs  |        |        |        |
|-------------------------|-----------|------------------|--------|--------|--------|-------|--------|--------|--------|
|                         |           | 50K              | 600K   | GBS    | ALL    | 50K   | 600K   | GBS    | ALL    |
| Marker Nb               |           | 42046            | 459191 | 308929 | 810580 | 42046 | 459191 | 308929 | 810580 |
| Total Nb                | DTA       | 52               | 759    | 345    | 1115   | 20    | 130    | 133    | 226    |
|                         | plantHT   | 68               | 778    | 299    | 1061   | 16    | 96     | 90     | 160    |
|                         | GY        | 123              | 1416   | 538    | 1941   | 33    | 166    | 120    | 238    |
|                         | Per trait | 81               | 984    | 394    | 1372   | 23    | 131    | 114    | 208    |
| Average per en-<br>vir. | DTA       | 2.4              | 34.5   | 15.7   | 50.7   | 0.9   | 5.9    | 6.0    | 10.3   |
|                         | plantHT   | 3.1              | 35.4   | 13.6   | 48.2   | 0.7   | 4.4    | 4.1    | 7.3    |
|                         | GY        | 5.6              | 64.4   | 24.5   | 88.2   | 1.5   | 7.5    | 5.5    | 10.8   |
|                         | Per trait | 3.7              | 44.7   | 17.9   | 62.4   | 1.0   | 5.9    | 5.2    | 9.5    |

322 QTLs were obtained by grouping associated SNPs with overlapping LD windows ( $LD_{win}$ )  
 323 for the three traits (DTA: male flowering time; PlantHT: plant height; GY: grain yield).  
 324 “Marker Nb” indicates the number of markers tested in GWAS. “Total number”: is the sum of  
 325 associated SNPs or QTLs across environments. “Average per envir” indicates the average  
 326 number of QTLs obtained in 22 environments for three traits (66 trait-environments  
 327 combinations). *Average per SNP tested* indicates the number of associated SNPs or QTLs  
 328 detected divided by the number of SNP tested.

329

330 We used two approaches based on LD for grouping significant SNPs (Figure 3): (i)  
 331 considering that all SNPs with overlapping LD windows for  $r^2K=0.1$  belong to the same QTL  
 332 ( $LD_{win}$ ) and (ii) grouping significant SNPs that are adjacent on the physical map and are in  
 333 LD ( $r^2K > 0.5$ ,  $LD_{adj}$ ). The QTLs defined by using the two approaches were globally



334 consistent since significant SNPs within QTLs were in high LD whereas SNPs from different  
335 adjacent QTLs were not (Additional file 7: Figure S7-LD-Adjacent and Additional file 8:  
336 Figure S8-LD-Windows). *LD\_adj* detected more QTLs than *LD\_win* for flowering time (242  
337 vs 226), plant height (240 vs 160) and grain yield (433 vs 237). The number of QTLs detected  
338 with the *LD\_adj* approach increased strongly when the LD threshold was set above 0.5.  
339 Differences in QTL groupings between the two methods were observed for specific LD and  
340 recombination patterns. This occurred for instance on chromosome 6 for grain yield  
341 (Additional file 7: Figure S7-LD-Adjacent and Additional file 8: Figure S8-LD-Windows).  
342 Within this region, the recombination rate was low and the LD pattern between associated  
343 SNPs was complex (Additional file 1: Figure S1). While *LD\_adj* splitted several SNPs in high  
344 LD into different QTLs (for instance QTL 232, 235, 237, 249), *LD\_win* grouped together  
345 associated SNPs that are genetically close but displayed a low LD (Additional file 7: Figure  
346 S7-LD-Adjacent and Additional file 8: Figure S8-LD-Windows). Reciprocally, for flowering  
347 time, we observed different cases where *LD\_win* separated distant SNPs in high LD into  
348 different QTLs whereas *LD\_adj* grouped them (QTL 25 and 26, 51 to 53, 95 to 97, 208 and  
349 209, 218 and 219). As these differences were specific to complex LD and recombination  
350 patterns, we used the *LD\_win* approach for the rest of the analyses.

351

352 Although a large difference in number of associated SNPs was observed between 600K and  
353 GBS, little difference was observed between QTL number after grouping SNPs (Table 3,  
354 Table 4). The mean number of QTLs was indeed 1.0, 5.9, 5.2 and 9.5 for the 50K, 600K,  
355 GBS, and the three technologies combined, respectively (Table 4). Note that the number of  
356 QTLs continued to increase with marker density when SNPs from GBS, 50K and 600K were  
357 combined (Additional file 9: Figure S9). The number of SNPs associated with each QTL

358 varied according to the technology (on average 3.7, 7.6, 3.4 and 6.6 significant SNPs for the  
359 50K, 600K, GBS, and the combined technologies, respectively). The total number of QTLs  
360 detected over all environments by using the 600K and GBS was close for flowering time (130  
361 vs 133) and plant height (96 vs 90). It was 1.4-fold higher for the 600K than GBS for grain  
362 yield (166 vs 120).  
363

### **The 600K and GBS were highly complementary for association mapping**

364 Seventy eight percent, 76% and 71% of the QTLs of flowering time, plant height and grain  
365 yield were specifically detected by 600K or GBS, respectively (Figure 4). On the contrary,  
366 50K displayed very few specific QTLs. When we combined the GBS and 600K markers, 7%  
367 of their common QTLs had  $-\log_{10}(Pval)$  increased by 2 and 21% by 1, potentially indicating a  
368 gain in accuracy of the position of the causal polymorphism (Additional file 10: Table S1).  
369 This complementarity between GBS and 600K is well exemplified with two strong  
370 association peaks for flowering time on chromosome 1 (QTL32) and 3 (QTL95) detected in  
371 several environments (Additional file 10: Table S1 and Figure 5a). In order to better  
372 understand the origin of the complementarity between GBS and 600K technologies for  
373 GWAS, we scrutinized the LD between SNPs and the haplotypes within these two QTLs  
374 (Figure 5b and c, and Additional file 11: Figure S10 for other examples). QTL95 showed a  
375 gain in power. It was only identified by the 600K although the region included numerous  
376 SNPs from GBS close to the associated peak. None of these SNPs was in high LD with the  
377 most associated marker of the QTL95 (Figure 5b). QTL32 was detected by 1 to 10 GBS  
378 markers in 9 environments with  $-\log(p\text{-value})$  ranging from 5 to 7.6, whereas it was detected  
379 by only two 600K markers in one environment (Ner12W) with  $-\log(p\text{-value})$  slightly above

380 the significance threshold (Additional file 10: Table S1 and Figure 5b).

381

382 Haplotype analyses showed that the SNPs from the GBS within QTL95 were not able to  
383 discriminate all haplotypes (Figure 5c). In QTL95, the 600K markers discriminated the three  
384 main haplotypes (H1, H2, H3), whereas using the GBS markers did not discriminate H3  
385 against H1 + H2. As H1 contributed to an earlier flowering time than H2 or H3, associations  
386 appeared more significant for the 600K than for GBS (Figure 5c). In QTL32, the use of GBS  
387 markers identified late individuals that mostly displayed H1, H2 and H3 haplotypes, against  
388 early individuals that mostly displayed H4 and H5 haplotypes (Figure 5c). The gain of power  
389 for GBS markers as compared to 600K markers for QTL32 originated from the ability to  
390 discriminate late individuals (black alleles) from early individuals (red alleles) within H4  
391 haplotypes (Figure 5c).

392 To further decipher which differences between 600K and GBS impacted GWAS, we  
393 used a resampling approach to explore the interplay between (i) MAF distribution and (ii)  
394 SNP distribution along the genome, at different SNP densities. We detected more SNP  
395 associations but less QTL with MAF distribution skewed towards low than high MAF. This  
396 difference increased as marker density increased (Additional file 12: Figure S11). As GBS has  
397 a MAF distribution skewed towards low MAF compared to 600K, GBS detected more QTLs  
398 but less associated SNPs than 600K. This discrepancy between association and QTL detection  
399 came from the fact that QTLs with low MAF were identified by less associated SNP than  
400 those with high MAF (Additional file 13: Figure S12).

401 Regarding distribution along the genome, SNPs distributed similarly to GBS  
402 detected more QTLs but less significant SNPs than those following the distribution of 600K  
403 and 50K, notably for the highest SNP density (Additional file 13: Figure S12). We observed

404 that SNP evenly distributed according to the physical distance detected more associations but  
405 less QTLs than all other SNP distributions along the genome. It was the contrary for SNP  
406 evenly distributed according to genetic distance (Additional file 12: Figure S11 C and D).  
407 This is consistent with QTL distribution along the genome being more correlated to the  
408 genetic than physical distance (see below), and the fact that recombination is higher in gene  
409 rich regions, leading to less associated SNPs per QTL. Superiority of QTL detection by GBS  
410 distribution as compared to 600K and 50K SNP distributions came from the higher proportion  
411 of SNPs in high recombinogenic regions for GBS than for 600K and 50K (Figure 1). This  
412 suggests that the complementarity of 600K and GBS in terms of QTL detected and SNP  
413 associations came also from their specificities for both SNP distributions along the genome  
414 and MAF distribution. In the end, we studied the impact of genomic coverage differences  
415 between 600K and GBS on QTL detection along the genome. QTLs detected by both 600K  
416 and GBS were located in intervals with large differences in coverage less frequently than their  
417 proportion in the entire genome (0.8% vs 7.8%, respectively). Intervals with specific QTLs  
418 showed an enrichment in such intervals with high differences in coverage (3.5%) but still  
419 below the proportion in the entire genome. It confirmed that most specific QTLs showed no  
420 strong genomic coverage differences between GBS and 600K and therefore that  
421 complementarity of QTL detection between these two technologies came from ability to tag  
422 different haplotypes.  
423

### **Colocalization of QTLs between environments and traits and distribution of QTL along the genome**

424 After combining the three technologies, we identified 226, 160, 238 QTLs for flowering time,

425 plant height and grain yield, respectively (Table 4 and Additional file 10: Table S1). We  
426 highlighted 23 QTLs with the strongest effects on flowering time, plant height and grain yield  
427 ( $-\log_{10}(Pval) \geq 8$ , Table 5). The strongest association corresponded to the QTL95 for  
428 flowering time ( $-\log_{10}(p-value) = 10.03$ ) on chromosome 3 (158,943,646 – 159,005,990 bp),  
429 the QTL135 for GY ( $-\log_{10}(p-value) = 18.7$ ) on chromosome 6 (12,258,527 – 29,438,316 bp)  
430 and QTL78 on chromosome 6 (12,258,527 – 20,758,095 bp) for plant height ( $-\log_{10}(p-value)$   
431 = 17.31). The QTL95 for flowering time trait was the most stable QTLs across environments  
432 since it was detected in 19 environments (Additional file 10: Table S1). Moreover, this QTL  
433 showed a colocalization with QTL74 for grain yield in 5 environments and QTL30 for plant  
434 height in 1 environment suggesting a pleiotropic effect. More globally, 472 QTLs appeared  
435 trait-specific whereas 70 QTLs overlapped between at least two traits (6.3%, 5.2% and 3.0%  
436 for GY and plantHT, GY and DTA, and DTA and plantHT, respectively) suggesting that some  
437 QTLs may be pleiotropic (Additional file 14: Figure S13). This was not surprising since  
438 average corresponding correlations within environments for these traits were moderate (0.47,  
439 0.54 and 0.45, respectively). Only 0.7% overlapped between the three traits (Additional file  
440 14: Figure S13). Twenty percent of QTLs were detected in at least two environments and 9%  
441 in at least three environments (Additional file 15: Table S2). We observed no significant  
442 differences of stability between the three traits ( $p-value = 0.2$ ). However, 6 out 7 most stable  
443 QTLs (Number of environments >5) were found for flowering time. This was consistent with  
444 higher average correlations between environments observed flowering time than for plant  
445 height and grain yield (0.76, 0.43, 0.48, respectively). We observed that QTLs that displayed a  
446 significant effect in more than one environment had larger effects and  $-\log(p-value)$  values  
447 than those significant in a single environment. This difference in  $-\log(p-value)$  values was  
448 stronger for grain yield and plant height than flowering time.

449 **Table 5:** Summary of the main QTLs ( $-\log_{10}(Pval) \geq 8$ ) identified for the three traits.

| Trait   | QTL | Chr | Pos         | Lower Limit | Upper Limit | R2   | Effect | Log   | Minor All | Major All | MAF  | EnvMax | Nb DiffEnv |
|---------|-----|-----|-------------|-------------|-------------|------|--------|-------|-----------|-----------|------|--------|------------|
| DTA     | 95  | 3   | 158,974,594 | 158,943,646 | 159,005,990 | 0.15 | 1.27   | 10.03 | G         | C         | 0.41 | Ner13R | 19         |
|         | 21  | 2   | 130,441,738 | 129,971,437 | 130,912,039 | 0.15 | -6.74  | 9.21  | A         | G         | 0.14 | Cam12W | 3          |
|         | 71  | 6   | 6,614,012   | 6,593,785   | 6,636,807   | 0.13 | -4.76  | 8.39  | G         | A         | 0.18 | Cam12R | 2          |
|         | 72  | 6   | 6,807,230   | 6,793,841   | 6,837,747   | 0.14 | -4.87  | 8.77  | T         | G         | 0.18 | Cam12R | 2          |
|         | 78  | 6   | 20,330,595  | 12,258,527  | 20,758,095  | 0.27 | -8.99  | 17.31 | C         | T         | 0.26 | Cam12W | 4          |
|         | 79  | 6   | 22,905,376  | 21,037,721  | 23,951,687  | 0.19 | -5.45  | 11.42 | T         | G         | 0.31 | Cam12R | 3          |
|         | 80  | 6   | 25,3178,25  | 24,184,017  | 26,606,537  | 0.13 | -4.41  | 8.17  | T         | C         | 0.2  | Cam12R | 2          |
|         | 81  | 6   | 28,130,108  | 26,695,327  | 28,659,766  | 0.16 | -5.14  | 9.84  | C         | G         | 0.44 | Cam12R | 2          |
|         | 94  | 6   | 101,482,646 | 101,463,249 | 101,501,936 | 0.14 | -5.98  | 8.22  | T         | A         | 0.17 | Cam12W | 2          |
|         | 110 | 8   | 12,782,777  | 12,767,198  | 12,798,330  | 0.19 | -7.67  | 12.44 | C         | T         | 0.22 | Cam12W | 3          |
| plantHT | 65  | 3   | 141,621,777 | 140,505,559 | 144,210,207 | 0.12 | 0.42   | 8.13  | A         | C         | 0.27 | Gai12W | 5          |
|         | 85  | 3   | 187,028,970 | 186,994,852 | 187057,772  | 0.12 | -0.48  | 8.49  | A         | C         | 0.28 | Kar12W | 1          |
|         | 120 | 6   | 5,155,708   | 5,131,927   | 5,177,694   | 0.12 | -0.58  | 8.24  | C         | T         | 0.42 | Cam12W | 2          |
|         | 122 | 6   | 5,638,516   | 5,623,945   | 5,659,803   | 0.12 | -0.57  | 8.11  | T         | G         | 0.23 | Cam12W | 2          |
|         | 124 | 6   | 5,871,000   | 5,855,407   | 5,887,383   | 0.12 | -0.56  | 8.4   | T         | G         | 0.42 | Cam12W | 2          |
|         | 127 | 6   | 6,612,654   | 6,593,785   | 6,636,807   | 0.16 | -0.65  | 10.44 | C         | A         | 0.32 | Cam12W | 2          |
|         | 128 | 6   | 6,807,462   | 6,793,841   | 6,837,747   | 0.12 | -0.54  | 8.41  | A         | C         | 0.26 | Cam12W | 2          |
|         | 129 | 6   | 6,890,199   | 6,878,877   | 6,930,838   | 0.12 | 0.63   | 8.06  | T         | A         | 0.48 | Cam12W | 3          |
|         | 130 | 6   | 7,046,773   | 7,027,497   | 7,088,575   | 0.13 | 0.62   | 8.71  | A         | G         | 0.4  | Cam12W | 3          |
|         | 131 | 6   | 7,159,714   | 7,113,662   | 7,200,479   | 0.12 | 0.59   | 8.24  | T         | C         | 0.39 | Cam12W | 3          |
|         | 135 | 6   | 18,528,943  | 12,258,527  | 29,438,316  | 0.28 | -0.78  | 18.7  | G         | C         | 0.31 | Cam12W | 6          |
|         | 147 | 6   | 101,482,646 | 101,463,249 | 101,501,936 | 0.22 | -0.65  | 15.04 | T         | A         | 0.17 | Cam12W | 5          |
|         | 173 | 8   | 12,782,777  | 12,767,198  | 12,798,330  | 0.17 | -0.61  | 11.8  | C         | T         | 0.22 | Cam12W | 4          |

450 “Pos” indicates the physical position in base pair of the SNP with the strongest association on the V2 of reference genome. *LowerLimit* and  
 451 *UpperLimit* indicate the lower and upper physical limits estimated by LD windows (*LD\_win*) for each QTL. The proportion of the variance  
 452 explained ( $R^2$ ), the effect of the major allele (*Effect*) as outputted by FastLMM,  $-\log_{10}(Pval)$  (*Log*), the minor and major alleles (Minor All  
 453 and Major All) and the minor allele frequency (*MAF*) of the most significant SNP within the QTL are shown. The following columns

454 represent environment for which the most associated QTL was observed (EnvMax) and the number of different environments in which  
455 QTL are detected (NbDiffEnv) are shown. Note that QTLs 71-72 for the plant height and QTLs 129-130 for the grain yield are genetically  
456 close (<1cM) and display high mean LD ( $r^2K>0.5$ ). Hence, QTLs 71-72 and 129-130 can potentially be merged.

457 The distribution of QTLs was not homogeneous along the genome since 82%, 77% and 79%  
458 of flowering time, plant height and grain yield QTLs, respectively, were located in the high  
459 recombinogenic regions, whereas they represented 46% of the physical genome (Additional  
460 file 16: Table S3). The QTLs were more stable ( $\geq 2$  environments) in low than in high  
461 recombinogenic regions (12.8% vs 5.8%,  $p$ -value = 0.03).

## 462 Discussion

### GBS required massive imputation but displayed similar global trends than DNA arrays for genetic diversity organization

463 In order to reduce genotyping cost, GBS is most often performed at low depth leading to a  
464 high proportion of missing data, thereby requiring imputation in order to perform GWAS.  
465 Imputation can produce genotyping errors that can cause false associations and introduce bias  
466 in diversity analysis [33]. We evaluated the quality of genotyping and imputation obtained by  
467 different approaches, taking the 50K or 600K as references. The best imputation method that  
468 yielded a fully genotyped matrix with the lowest error rate for the prediction of both  
469 heterozygotes and homozygotes was the approach merging the homozygous genotypes from  
470 TASSEL and the imputation of Beagle for the other data (GBS<sub>5</sub> Table 1). The quality of  
471 imputation was high with 96% of allelic values consistent with those of the 50K and 600K.  
472 This level of concordance is identical to a study of USA national maize inbred seed bank by  
473 Romay *et al.* [32]. It is higher than in a diversity study of European flint maize collection  
474 (93%) by Gouesnard *et al.* [33], which was more distant from the reference AllZeaGBSv2.7  
475 database than for the panel presented here. For further studies, integrating genotyping data  
476 from the three technologies may reduce imputation errors for missing data of GBS [35].

477



478 The ascertainment bias of SNP-arrays due to the limited number of lines used for SNP  
479 discovery was reinforced by counter-selection of rare alleles during the design process of  
480 DNA arrays [3, 4]. For GBS, the polymorphism database to call polymorphisms included  
481 thousands of diverse lines [38]. In our study, we used AllZeaGBSv2.7 database. After a first  
482 step of GBS imputation (GBS<sub>2</sub>), missing data dropped to 11.9% *i.e.* only slightly more than  
483 in Romay *et al.* (10%) [32]. This confirms that the polymorphism database (AllZeaGBSv2.7)  
484 covered adequately the genetic diversity of our genetic material.

485

486 Although, we observed differences of allelic frequency spectrum between GBS and DNA  
487 arrays, these technologies revealed similar trends in the organization of population structure  
488 and relatedness (Figure 2, Additional file 4: Figure S4) suggesting no strong ascertainment  
489 bias for deciphering global genetic structure trends in the panel. However, although highly  
490 correlated, level of relatedness differed between GBS and DNA arrays, especially when the  
491 lines were less related as showed by the deviation (to the left) of the linear regression from the  
492 bisector (Additional file 5: Figure S5).

### **The extent of linkage disequilibrium strongly varied along and between chromosomes**

493 Linkage disequilibrium extent in high recombinogenic regions varied to a large extent among  
494 chromosomes, ranging from 0.012 to 0.062 cM. Similar variation of genetic LD extent  
495 between maize chromosomes has been previously observed by Rincent *et al.* [14], but their  
496 classification of chromosomes was different from ours. This difference could be explained by  
497 the fact that we analyzed specifically high and low recombination regions. According to Hill  
498 and Weir Model [40], the physical LD extent in a genomic region increased when the local  
499 recombination rate decreased. As a consequence, chromosome 1 and 9 had the lowest and

500 highest physical LD extent and displayed the highest and one of the lowest recombination rate  
501 in pericentromeric regions, respectively (0.26 vs 0.11 cM / Mbp, Table 2 and Additional file  
502 16: Table S3). Unexpectedly, the genetic LD extent also correlated negatively with the  
503 recombination rate. It suggested that chromosomes with a low recombination rate also display  
504 a low effective population size. Background selection against deleterious alleles could explain  
505 this pattern since it reduces the genetic diversity in low recombinogenic regions [41, 42].  
506 Finally, we observed a strong variation of the LD extent along each chromosome . As we used  
507 a consensus genetic map [43] that represents well the recombination within our population, it  
508 suggested, according to Hill and Weir's model, that the number of ancestors contributing to  
509 genetic diversity varied strongly along the chromosomes. This likely reflects the selection of  
510 genomic regions for adaptation to environment or agronomic traits [41], that leads to a  
511 differential contribution of ancestors according to their allelic effects. Ancestors with strong  
512 favorable allele(s) in a genomic region may lead ultimately to large identical by descent  
513 genomic segments [44].

### **SNPs were clustered into QTL highlighting interesting genomic regions**

514 In previous GWAS studies, the closest associated SNPs were grouped into QTLs  
515 according to either a fixed physical distance [1] or a fixed genetic distance [30, 43]. These  
516 approaches suffer of two drawbacks. First, the physical LD extent can vary strongly along  
517 chromosomes according to the variation of recombination rate (Figure 1 and Additional file 3:  
518 Figure S3). Second, the genetic LD extent depends both on panel composition and the  
519 position along the genome (Table 2). These approaches may therefore strongly overestimate  
520 or underestimate the number of QTLs. To address both issues Cormier *et al.* [46] proposed to  
521 group associated SNPs by using a genetic window based on the genetic LD extent estimated

522 by Hill and Weir model in the genomic regions around the associated peaks [40]. In our study,  
523 we improved this last approach (*LD\_win*):

524 - First, we used  $r^2K$  that corrected  $r^2$  for kinship rather than the classical  $r^2$  since  $r^2K$   
525 reflected the LD addressed in our GWAS mixed models to map QTL [17].

526 - Second, we took advantage of the availability of both physical and genetic maps of  
527 maize to project the genetic LD extent on the physical map. This physical window was useful  
528 to retrieve the annotation from B73 reference genome, decipher local haplotype diversity  
529 (Figure 5) and estimate physical genome coverage (Table 2, 1, Additional file 3: Figure S3).

530 - Third, we considered an average LD extent estimated separately in the high and low  
531 recombinogenic genomic regions. This average was estimated by using several large random  
532 sets of pairs of loci in these regions rather than the local LD extent in the genomic regions  
533 around each associated peaks.

534

535 We preferred this approach rather than using local LD extent in order to limit the effect of (i)  
536 the strong variation of marker density along the chromosome (Additional file 3: Figure S3),  
537 (ii) the local ascertainment bias due to the markers sampling (iii) the poor estimation of the  
538 local recombination rate using a genetic map, notably for low recombination regions [3, 44]  
539 (iv) errors in locus order due to assembly errors or chromosomal rearrangements.

540

541 We compared *LD\_win* with *LD\_adj*, another approach based on LD to group the SNPs  
542 associated to trait variation into QTL. The discrepancies between the two approaches can be  
543 explained by the local recombination rate and LD pattern. Since *LD\_adj* approach was based  
544 on the grouping of contiguous SNPs according to their LD, this approach was highly sensitive  
545 to (i) error in marker order or position due to genome assembly errors or structural variations,

546 which are important in maize [47] (ii) genotyping or imputation errors, which we estimated at  
547 *ca.* 1% and *ca.* 4%, respectively, for GBS (Table 1), (iii) presence of allelic series with  
548 contrasted effects in different experiments which are currently observed in maize [45], (iv)  
549 LD threshold used. On the other hand, *LD\_win* lead either to inflate the number of QTLs in  
550 high recombinogenic regions in which SNPs were too distant genetically to be grouped, or  
551 deflated their number by grouping associated SNPs in low recombinogenic regions. Since  
552 *LD\_win* considered the average LD extent, this method could conduct either to separate or  
553 group abusively SNPs when local LD extent was different than the global LD extent.  
554 Simulations will be carried out in further research to better understand the properties of  
555 *LD\_win* and *LD\_adj* approach.

556

557 Note that LD windows should not be considered as confidence intervals since the  
558 relationship between LD and recombination is complex due to demography, drift and  
559 selection in association panels, contrary to linkage based QTL mapping [17]. The magnitude  
560 of the effect of causal polymorphism in the estimation of these intervals, which is well  
561 established for linkage mapping, should be explored further [48]. Other approaches have been  
562 proposed to cluster SNPs according to LD [45, 46]. These approaches aim at segmenting the  
563 genome in different haplotype blocks separating by high recombination regions. These  
564 methods are difficult to use for estimating putative windows inside which the causal  
565 polymorphisms are located because such approaches are not centered on the associated SNP.

566 Several QTLs identified by *LD\_win* in our study correspond to regions previously  
567 identified: in particular six regions associated with female flowering time [27] and 30 regions  
568 associated with different traits in the Cornfed dent panel [11]. Conversely, we did not identify  
569 in our study any QTL associated to the florigen *ZCN8*, which showed significant effect in

570 these two previous studies. One of the explanation is that we narrowed the flowering time  
571 range in our study, in particular by eliminating early lines. This reduced the representation of  
572 the early allele at the *Zcn8* locus, leading to a MAF of 0.27 in our study vs. 0.35 in Rincent *et*  
573 *al.* [11], which can slightly diminish the power of the tests [14]. Also, this effect may have  
574 strengthened by frequency evolution at loci involved in epistatic interactions with *Zcn8* (see  
575 [47] for a recent demonstration of such effects).

**Complementarity of 600K and GBS for QTL detection resulted mostly from the tagging of different haplotypes rather than the coverage of different genomic regions.**

576 Number of significant SNPs and QTLs increased with the increase in marker number (Table  
577 4, Additional file 9: Figure S9). This could be explained partly by a better coverage of some  
578 genomic regions by SNPs, notably in high recombinogenic regions which showed a very short  
579 LD extent and were enriched in QTLs (Additional file 16 Table S3). Numerous new QTLs  
580 identified by the 600K and GBS as compared with those identified by the 50K were detected  
581 in high recombinogenic regions that were considerably less covered by the 50K than the 600K  
582 or GBS (Figure 1 and Additional file 3: Figure S3).

583

584 The high complementarity for QTL detection between GBS and 600K was only explained to a  
585 limited extent by the difference of the SNP distribution and density along the genome, since  
586 these two technologies targeted similar regions as showed by coverage analysis (Figure 1 and  
587 Additional file 3: Figure S3). However, at a finer scale, SNPs from the 600K and GBS could  
588 tag close but different genomic regions around genes. SNPs from the 600K were mostly  
589 selected within coding regions of genes [4], whereas SNP from GBS targeted more largely  
590 low copy regions, which included coding but also regulatory regions of genes [32, 38]. To

591 further analyse the complementarity of the technologies, we analysed local haplotypes and the  
592 effect of genome coverage differences between technologies on QTL detection. We showed  
593 that both technologies captured different haplotypes when similar genomic regions were  
594 targeted (Figure 5). In this figure, two QTLs were specifically detected by markers from  
595 either 600K or GBS although there are several markers from other technology very close from  
596 the most associated marker, considering the size of LD windows around it . Additionally, we  
597 did not observe an enrichment of QTL specifically detected by one technology in 20kbp-  
598 intervals with high genomic coverage difference between 600K and GBS Hence, we  
599 pinpointed that GBS and DNA arrays are highly complementary for QTL detection because  
600 they tagged different haplotypes rather than different regions (Figure 5). Based on the L-  
601 shaped MAF distribution, which suggests no ascertainment bias, and the high number of  
602 sequenced lines used for the GBS, we expect a closer representation of the variation present in  
603 our panel by this technology compared to the 600K, but this comes to the cost of an  
604 enrichment in rare alleles. Both factors tend to counterbalance each other in terms of GWAS  
605 power (Additional file 13: Figure S12).

606

607 Our results suggest that we did not reach saturation with our *c.* 800,000 SNPs because (i)  
608 some haplotypes certainly remain not tagged (ii) the genome coverage was not complete, and  
609 (iii) the number of significant SNPs and QTLs continued to increase with marker density  
610 (Additional file 9: Figure S9). Considering LD and marker density, the genotypic data  
611 presently available were most likely enough to well represent polymorphisms in the  
612 centromeric regions, whereas using more markers would be beneficial for telomeric regions.  
613 New approaches based on resequencing of representative lines and imputation are currently  
614 developed to achieve this goal.

615

## 616 **Methods**

### **Plant Material and Phenotypic Data**

617 The panel involves 247 maize inbred lines, further referred to as DROPS panel (Additional  
618 file 17: Table S4). They include 164 lines from a wider panel of lines from Europe and  
619 America [11] and 83 additional lines derived from public breeding programs in Hungary, Italy  
620 and Spain and recent lines free of patent from the USA. All lines belong to the dent genetic  
621 group, which can be subdivided in different sub-groups (see [11, 30]). Lines were selected  
622 within a restricted flowering time window (10 days) in order to limit the effect of drought  
623 escape due to flowering time variation in the identification of genomic regions involved in  
624 drought tolerance [30]. Candidate lines with poor sample quality, i.e. high level of  
625 heterozygosity, or high relatedness with other lines were discarded in this selection. The lines  
626 selection was also guided by pedigree to avoid as far as possible over-representation of some  
627 ancestral materials.

628 The 247 inbred lines were all crossed with a common line (UH007) from the Flint genetic  
629 groups to obtain 247 hybrids (hybrid panel). Dent and Flint genetic groups are known to be  
630 complementary to produce hybrids [48]. Further, as UH007 is unrelated to any line in the  
631 panel, no hybrid is affected by inbreeding depression. This guarantees that hybrids have a  
632 level of performance and an overall physiology comparable to that of varieties used in  
633 agriculture. Conversely, field evaluation of inbred lines per se would have diminished yield by  
634 more than 50%.

635 Experimental design and model used for obtaining adjusted means for male flowering time  
636 (Day To Anthesis, DTA), plant height (plantHT), and grain yield (GY) were previously

637 described [30]. While DTA and GY were previously analyzed in [30], PlantHT was not.  
638 Briefly, the hybrid panel were evaluated for these three traits in 22 experiments (combination  
639 year x site x water regime), *i.e.* at seven sites in Europe, during two years (2012 and 2013),  
640 and for two water treatments (watered and rainfed) [30]. Experiments were designed as alpha-  
641 lattice designs with two and three replicates for watered and rain-fed regimes, respectively.  
642 Grain yield ( $\text{t ha}^{-1}$ ) was adjusted to 15% moisture. The adjusted mean (Best Linear Unbiased  
643 Estimation, BLUEs, <https://doi.org/10.15454/IASSTN>) of the three traits were estimated per  
644 environment (site  $\times$  year  $\times$  water regime) using a mixed model based on fixed hybrid and  
645 replicate effects, random spatial effects (rows and columns), and spatially correlated errors in  
646 order to take into account spatial variation of micro-environment in each field trial (see [30]  
647 for more details). The same model, but with random hybrids effects, was used to estimate  
648 variance components. Models were fitted with ASReml-R [49]. Narrow-sense heritability of  
649 each trait in each environment were also estimated as in [30] (Additional file 18: Table S5).  
650 As all hybrids share a common parent (UH007), adjusted means (BLUEs) of hybrids were  
651 combined with genotyping data of the corresponding dent inbred lines of the panel to perform  
652 GWAS, following a usual practice in maize genetics [11].

### **Genotyping and Genotyping-By-Sequencing Data**

653 The 247 inbred lines were genotyped using three technologies: a maize Illumina Infinium HD  
654 50K array [3], a maize Affymetrix Axiom 600K array [4], and Genotyping-By-Sequencing [2,  
655 38]. In the arrays, DNA fragments are hybridized with probes attached to the array  
656 (Additional file 19: Notes S1 for the description of the data from the two SNP-arrays).  
657 Genotyping-by-sequencing technology is based on multiplex resequencing of tagged DNA  
658 using restriction enzyme (Keygene N.V. owns patents and patent applications protecting its



659 Sequence Based Genotyping technologies) [2]. Cornell Institute (NY, USA) processed raw  
660 sequence data using a multi-step Discovery and a one-step Production pipeline (*TASSEL-*  
661 *GBS*) in order to obtain genotypes (Additional file 19: Notes S1). An imputation step of  
662 missing genotypes was carried out by Cornell Institute [39], which utilized an algorithm that  
663 searches for the closest neighbour in small SNP windows across the haplotype library [38].

664

665 We applied different filters (heterozygosity rate, missing data rate, minor allele frequency) for  
666 a quality control of the genetic data before performing the diversity and association genetic  
667 analyses. For GBS data, the filters were applied after imputation using the method  
668 “Compilation of Cornell homozygous genotypes and Beagle genotypes” (GBS<sub>5</sub> in Additional  
669 file 1: Figure S1; See section “Evaluating Genotyping and Imputation Quality”). We  
670 eliminated markers that had an average heterozygosity and missing data rate higher than 0.15  
671 and 0.20, respectively, and a Minor Allele Frequency (MAF) lower than 0.01 for the diversity  
672 analyses and 0.05 for the GWAS (Additional file 20: Table S6). Individuals which had  
673 heterozygosity and/or missing data rate higher than 0.06 and 0.10, respectively, were  
674 eliminated.

675

### **Evaluating Genotyping and Imputation Quality**

676 Estimation of genotyping and imputation quality was performed using the entire panel except  
677 two inbred lines that had different seedlots between technologies. The 50K and the 600K were  
678 taken as reference to compare the concordance of genotyping (genotype matches) with the im-  
679 putation of GBS based on their position. While SNP positions and orientation from GBS were  
680 called on the reference maize genome B73 AGP\_v2 (release 5a) [50], flanking sequences of

681 SNPs in the 50K were primary aligned on the first maize genome reference assembly B73  
682 AGP\_v1 (release 4a.53) [51]. Both position and orientation scaffold carrying SNPs from the  
683 50K can be different in the AGP\_v2, which could impair correct comparison of genotype  
684 between the 50K and GBS. Hence, we aligned flanking sequences of SNPs from the 50K on  
685 maize B73 AGP\_v2 using the Basic Local Alignment Search Tool (BLAST) to retrieve both  
686 positions and genotype in the same and correct strand orientation (forward) to compare geno-  
687 typing. The number of common markers between the 50K/600K, 50K/GBS, GBS/600K and  
688 50K/600K/GBS was 36,395, 7,018, 25,572 and 5,947 SNPs, respectively. The comparison of  
689 the genotyping and imputation quality between the 50K/GBS, 50K/600K and 600K/GBS was  
690 done on 5,336 and 24,286 and 26,154 common markers, respectively. The comparison for the  
691 50K involved PANZEA markers, prefixed as “PZE” [52]. In order to achieve these comparis-  
692 ons, we considered the direct reads from GBS (**GBS<sub>1</sub>**) and four approaches for imputation  
693 (**GBS<sub>2</sub>** to **GBS<sub>5</sub>**, Additional file 1: Figure S1). **GBS<sub>2</sub>** approach consisted of one imputation  
694 step from the direct read by Cornell University, using *TASSEL* software, but missing data was  
695 still present. **GBS<sub>3</sub>** approach consisted of imputation by *Beagle v3* [13] of the missing data of  
696 **GBS<sub>1</sub>**. To compare data from **GBS<sub>3</sub>** and **GBS<sub>2</sub>** to those of the 50K and 600K, missing data in  
697 **GBS<sub>2</sub>** were excluded from **GBS<sub>3</sub>**. In **GBS<sub>4</sub>**, genotype imputation by Beagle was performed on  
698 Cornell imputed data after replacing the heterozygous genotypes with missing data. **GBS<sub>5</sub>**,  
699 consisted of homozygous genotypes of **GBS<sub>2</sub>** completed by values imputed in **GBS<sub>3</sub>**, no miss-  
700 ing data remained (Additional file 1: Figure S1).

### Diversity Analyses

701 After excluding the unplaced SNPs and applying the filtering criteria for the diversity  
702 analyses ( $MAF > 0.01$ ), we obtained the final genotyping data of the 247 lines with 44,729

703 SNPs from the 50K, 506,662 SNPs from the 600K array, and 395,024 SNPs from the GBS  
704 (Additional file 20: Table S6). All markers of the 600K and GBS<sub>s</sub> that passed the quality  
705 control were used to perform the diversity analyses (estimation of Q genetic groups and K  
706 kinships). For the 50K, we used only the PANZEA markers (29,257 SNPs) [52] in order to  
707 reduce the ascertainment bias noted by Ganal *et al.* [3] when estimating Nei's index of  
708 diversity [53] and relationship coefficients. Genotypic data generated by the three  
709 technologies were organized as  $G$  matrices with  $N$  rows and  $L$  columns,  $N$  and  $L$  being the  
710 panel size and number of markers, respectively. Genotype of individual  $i$  at marker  $l$  ( $G_{i,l}$ ) was  
711 coded as 0 (the homozygote for an arbitrarily chosen allele), 0.5 (heterozygote), or 1 (the  
712 other homozygote). Identity-By-Descent (IBD) was estimated according to Astle and Balding  
713 [19]:

$$714 \quad K\_Freq_{i,j} = \frac{1}{L} \sum_{l=1}^L \frac{(G_{i,l} - p_l)(G_{j,l} - p_l)}{p_l(1 - p_l)},$$

715 where  $p_l$  is the frequency of the allele coded 1 of marker  $l$  in the panel of interest,  $i$   
716 and  $j$  indicate the inbred lines for which the kinship was estimated. We also estimated the  
717 Identity-By-State (IBS) by estimating the proportion of shared alleles. For GWAS, we used  
718  $K\_Chr$  [14] that are computed using similar formula as  $K\_Freq$ , but with the genotype data of  
719 all the chromosomes except the chromosome of the SNP tested. This formula provides an  
720 unbiased estimate of the kinship coefficient and weights by allelic frequency assuming Hardy-  
721 Weinberg equilibrium. Hence, relatedness is higher if two individuals share rare alleles than  
722 common alleles.

723

724 Genetic structure was analysed using the software *ADMIXTURE v1.22* [18] with a  
725 number of groups varying from 2 to 10 for the three technologies. We compared assignment  
726 by *ADMIXTURE* of inbred lines between the three technologies by estimating the proportion

727 of inbred lines consistently assigned between technologies two by two (50K vs GBS<sub>5</sub>, 50K vs  
728 600K, 600K vs GBS<sub>5</sub>) using a threshold of 0.5 for admixture.

729

730 Expected heterozygosity ( $H_e$ ) [53] was estimated at each marker as  $2p_i(1 - p_i)$  and  
731 was averaged on all the markers for a global characterization of the panel for the three  
732 technologies. Principal Coordinate Analyses (PCoA) were performed on the genetic distance  
733 matrices [54], estimated as  $I_{N,N} - K\_Freq$ , where  $I_{N,N}$  is a matrix of ones of the same size as  
734  $K\_Freq$ .

### Linkage Disequilibrium Analyses

735 We first analyzed the effect of the genetic structure and kinship on linkage disequilibrium  
736 (LD) extent within and between chromosomes by estimating genome-wide linkage  
737 disequilibrium using the 29,257 PANZEA SNPs from the 50K. Four estimates of LD were  
738 used: the squared correlation ( $r^2$ ) between allelic dose at two markers [55], the squared  
739 correlation taking into account global kinship with  $K\_Freq$  estimator ( $r^2K$ ), the squared  
740 correlation taking into account population structure ( $r^2S$ ), and the squared correlation taking  
741 into account both ( $r^2KS$ ) [17].

742

743 To explore the variation of LD decay and the stability of LD extent along the chromosomes,  
744 we estimated LD between a non-redundant set of 810,580 loci from the GBS, the 50K and  
745 600K. To save computation time, we calculated LD between loci within a sliding window of 1  
746 cM. Genetic position was obtained by projecting the physical position of each locus using a  
747 *smooth.spline* function R calibrated on the genetic consensus map of the Cornfed Dent Nested  
748 Association Mapping (NAM) design [56]. We used the estimator  $r^2$  and  $r^2K$  using 10 different

749 kinships  $K_{Chr}$ . This last estimator was calculated because it corresponds exactly to the LD  
750 used to map QTL in our GWAS model. It determines the power of GWAS to detect QTL  
751 considering that causal polymorphisms were in LD with some polymorphisms genotyped in  
752 our panel [17]. To study LD extent variation, we estimated LD extent by adjusting Hill and  
753 Weir's model [40] using non-linear regression (*nls* function in R-package *nlme*) against both  
754 physical and genetic position within each chromosome. Since recombination rate (cM / Mbp)  
755 varied strongly along the genome (Figure 1 and Additional file 3: Figure S3), we defined high  
756 ( $>0.5$  cM / Mbp) and low ( $<0.5$  cM / Mbp) recombinogenic genomic regions within each  
757 chromosome. We adjusted Hill and Weir's model [40] separately in low and high  
758 recombinogenic regions (Additional file 16: Table S3) by randomly sampling 100 sets of  
759 500,000 pairs of loci distant from less than 1 cM. This random sampling avoided over-  
760 representation of pairs of loci from low recombinogenic regions due to the sliding-window  
761 approach (Figure 3). 500,000 pairs of loci represented 0.36% (Chromosome 3 / High rec) to  
762 1.20% of all pairs of loci (Chromosome 8 / High rec).

763 For all analyses, we estimated LD extent by calculating the genetic and physical distance for  
764 the fitted curve of Hill and Weir's Model that reached  $r^2K=0.1$ ,  $r^2K=0.2$  and  $r^2K=0.4$ .

### Genome coverage estimation

765 In order to estimate the genomic regions in which the effect of an underlying causal  
766 polymorphisms could be captured by GWAS using LD with SNP from three technologies, we  
767 developed an approach to define LD windows around each SNP with  $MAF \geq 5\%$  based on LD  
768 extent (Figure 3). To set the LD window around each SNP, we used LD extent with  $r^2K=0.1$   
769 (negligible LD),  $r^2K=0.2$  (intermediate LD) and  $r^2K=0.4$  (high LD) estimated in low and high  
770 recombinogenic regions for each chromosome. We used the global LD decay estimated for

771 these large chromosomal regions rather than local LD extent (i) to avoid bias due to SNP  
772 sampling within small genomic regions, (ii) to reduce computational time, and (iii) to limit the  
773 impact of possible local error in genome assembly. In low recombinogenic regions, we used  
774 the physical LD extent, hypothesizing that recombination rate is constant along physical  
775 distance in these regions. In high recombinogenic regions, we used the genetic LD extent  
776 since there is a strong variation of recombination rate by base pair along the physical position  
777 (Figure 1 and Additional file 3: Figure S3). We then converted genetic LD windows into  
778 physical windows by projecting the genetic positions on the physical map using the  
779 *smooth.spline* function implemented in R, calibrated on the NAM dent consensus map [56].  
780 Reciprocally, we obtained the genetic positions of LD windows in low recombinogenic  
781 regions by projecting the physical boundaries of LD windows on the genetic map.

782

783 To estimate coverage of the three technologies to detect QTLs based on their SNP distribution  
784 and density, we calculated cumulative genetic and physical lengths that are covered by LD  
785 windows around the markers, considering different LD extents for each chromosome  
786 ( $r^2K=0.1$ ,  $r^2K=0.2$ ,  $r^2K=0.4$ ). In order to explore variation of genome coverage along the  
787 chromosome, we estimated the proportion of genome covered using a sliding-windows  
788 approach based on variable physical distances (20, 100, 500, 2000 kbp) considering LD extent  
789 for a  $r^2K = 0.1$ .

### **Statistical Models for Association Mapping**

790 We used four models to determine the statistical models that control best the confounding  
791 factors (*i.e.* population structure and relatedness) in GWAS (Additional file 21: Notes S2). We  
792 tested different software implementing either approximate (EMMAX) [8] or exact

793 computation of standard test statistics (ASReml and FaST-LMM) [6, 49] for computational  
794 time and GWAS results differences. Single-trait, single-environment GWAS was performed  
795 for each marker for each environment and all traits using FaST-LMM. We selected the mixed  
796 model using  $K\_Chr$ , estimated from PANZEA markers of the 50K to perform GWAS on 66  
797 situations (environment  $\times$  trait) (Additional file 21: Notes S2). We developed a GWAS  
798 pipeline in *R* v3.2.1 [55] calling FaST-LMM software and implementing [14] approaches to  
799 conduct single trait and single environment association tests.

800

801 To take into account multiple tests in GWAS and their dependence, we applied the methods of  
802 Moskvina and Schmidt [56] and Gao *et al.* [57, 58] to infer the number of independent tests to  
803 be considered in the Bonferroni formula. Using the Gao *et al.* [57, 58] approaches, we  
804 estimated the number of independent tests for GWAS at 15,780 for the 50K, 92,752 for the  
805 600K, 109,117 for the GBS<sub>5</sub> and 191,026 for the combined genetic data (i.e. merging of 50K,  
806 600K, GBS), leading to different  $-\log_{10}(p\text{-value})$  thresholds: 5.49, 6.27, 6.34 and 6.58,  
807 respectively. Because of these differences, we used two thresholds of  $-\log_{10}(p\text{-value}) = 5$  (less  
808 stringent) and 8 (highly conservative and slightly above Bonferroni) for comparing GWAS to  
809 avoid the differences of identification of significant SNPs between the technologies due to the  
810 choice of the threshold.

811

### **Methods for grouping associated SNPs into QTLs**

812 We used two approaches based on LD for grouping significant SNPs. The first approach  
813 (*LD\_win*) used LD windows, previously described, to group significant SNPs into QTLs  
814 considering that all significant SNPs with overlapping LD windows of  $r^2K=0.1$  belong to the

815 same QTL (Figure 3). We hypothesized that significant SNPs with overlapping LD windows  
816 at  $r^2K=0.1$  captured the same causal polymorphism and were therefore a single and unique  
817 QTL. For the second approach (*LD\_adj*), significant SNPs were grouped into a same QTL if  
818 they were connected in terms of LD ( $r^2K$  between adjacent significant SNPs superior to 0.5).  
819 We used LD heatmaps for comparing the SNP grouping produced by the two approaches on  
820 the three different traits across all environments (Additional file 7: Figure S7-LD-Adjacent  
821 and Additional file 8: Figure S8-LD-Windows). All scripts are implemented in R software  
822 [59].

### **Resampling approach to analyze effect of MAF distribution, SNP distribution along the genome, SNP density on QTL detection**

823 To study the effect of SNP density, MAF distribution and SNP distribution along the  
824 genome on association and QTL detection, we used a resampling approach of several sets of  
825 SNPs displaying different MAF distribution and SNP distribution along the chromosome. We  
826 compared these modalities with different SNP densities (50,000, 100,000, 150,000, 200,000,  
827 250,000 markers). In this resampling approach, we considered all markers together and that  
828 both associations and QTLs detected by the whole SNP sets are true. We selected only  
829 markers having MAF above 5%. To study the effect of MAF distribution on QTL detection  
830 SNPs were classified in 5 MAF classes (0-0.1, 0.1-0.2, 0.2-0.3, 0.3-0.4 and 0.4, 0.5) and SNP  
831 were randomly selected in each classes according to MAF distribution t1) similar to GBS  
832 (GBS\_MAF) 2) similar to 600K (600K\_MAF) 3) with equal frequency for 5 MAF classes  
833 (Flat\_MAF) 4) skewed towards high MAF (High\_MAF) with SNP frequency of 0, 0, 0.2,  
834 0.4, 0.4 in (0-0.1], (0.1-0.2], (0.2-0.3], (0.3-0.4], (0.4-0.5] MAF classes, respectively 5)



835 skewed towards low MAF (Low\_MAF) with SNP frequency of 0, 0, 0.2, 0.4, 0.4 in (0-0.1],  
836 (0.1-0.2], (0.2-0.3], (0.3-0.4], (0.4-0.5] MAF classes, respectively.

837 To study the effect of SNP distribution along the genome on QTL detection, we compared  
838 5 different SNP distributions along the chromosome: 1) evenly distributed according to the  
839 physical distance (Dens\_Phys), 2) evenly distributed according to the genetic distance  
840 (Dens\_Gen), 3) distributed like GBS (Dens\_GBS), 4) distributed similarly to 600K  
841 (Dens\_600K) 5) distributed like 50K (Dens\_50K). SNPs were sampled randomly according to  
842 the different densities in contiguous windows of 10Mbp.

#### 843 **List of abbreviations**

844 DTA = Day to Anthesis

845 GY = Grain Yield adjusted at 15% moisture

846 plantHT = Plant Height

847 GBS = Genotyping By Sequencing

848 LD = Linkage disequilibrium

849 GWAS = Genome-Wide Association Studies

850 MAF = Minimum Allelic Frequency

851 SNP = Single Nucleotide Polymorphism

852 HRR = High Recombinogenic Regions

853 LRR = Low Recombinogenic Regions

854 QTL = Quantitative Trait Locus

855

## 856 **Declarations**

### **Ethics approval and consent to participate**

857 Not applicable.

### **Consent for publication**

858 Not applicable.

### **Availability of data and material**

859 The following links toward the data will be available upon publication of this paper.

860 All the genotyping data used in this study can be found at <https://doi.org/10.15454/AEC4BN>.

861 *Genotyping data will become publicly available upon the publication with link above.*

862 *Genotyping data will be accessible anonymously with following private link for reviewers:*

863 *<https://data.inra.fr/privateurl.xhtml?token=dc792926-6996-4767-bbbe-bb347fd1edd4>*

864 The GWAS results can be found at <https://doi.org/10.15454/6TL2N4>.

865 *GWAS results will become publicly available upon the publication with link below. GWAS*

866 *results will be accessible anonymously with following private link for reviewers:*

867 *<https://data.inra.fr/privateurl.xhtml?token=1b99f286-94c8-40d1-a289-c18db1d6e646>*

868 The phenotypic dataset can be found at <https://doi.org/10.15454/IASSTN>.

### **Competing interests**

869 The authors declare that they have no competing interests.

## Funding

870 This project (Project ID: 244374) was funded under the European FP7- KBBE (CP – IP –  
871 Large-scale integrating project, DROPS) and the *Agence Nationale de la Recherche* project  
872 ANR-10-BTBR-01 (ANR-PIA AMAIZING).

## Authors' contributions

873 S.S.N., S.D.N. and A.C., designed the studied and wrote the article. S.S.N. performed  
874 genotyping data quality control, imputation and genetic analyses. S.D.N. developed and  
875 performed LD analyses. A.C. designed the association panel with the help of S.D.N. and C.W.  
876 C.B. participated in assembling the dent inbred lines panel, organizing the germplasms and  
877 field work for seeds production. E.J.M., C.W. and F.T. collected and analysed the phenotypic  
878 data. V.C. and D.M. performed DNA extraction and prepared the samples. All authors  
879 critically reviewed and approved the final manuscript.

## Acknowledgements

880 We are grateful to key partners from the field: Pierre Dubreuil, Cécile Richard, Jérémy Lopez  
881 (Biogemma), Tamás Spitzkó (MTA ATK), Therese Welz (KWS), Franco Tanzi, Ferenc Racz,  
882 Vincent Schlegel (Syngenta) and Maria Angela Canè (UNIBO). We also acknowledge Björn  
883 Usadel and Axel Nagel (MPI) for data management. We thank Willem Kruijer, Fred Van  
884 Eeuwijk (WUR), Tristan Mary-Huard and Laurence Moreau (INRA) for helpful discussions  
885 and statistical advice. We are grateful to Chris-Carolin Schön (TUM) for providing an early  
886 access to the Affymetrix Axiom 600K array and Edward Buckler (USDA) for providing  
887 genotyping using GBS. We are also grateful to partners of the CornFed project, Univ.  
888 Hohenheim (Germany), CSIC (Spain), CRAG (Spain), MTA ATK (Hungary), NCRPIS

889 (USA), CRB Maize (France) and CRA-MAC (Italy) who contributed to the genetic material.

### Authors' information (optional)

890 Not applicable.

### 891 References

- 892 1. Tian F, Bradbury PJ, Brown PJ, Hung H, Sun Q, Flint-Garcia S, Rocheford TR,  
893 McMullen MD, Holland JB, Buckler ES: **Genome-wide association study of leaf**  
894 **architecture in the maize nested association mapping population.** *Nature Genetics*  
895 2011, **43**:159.
- 896 2. Elshire RJ, Glaubitz JC, Sun Q, Poland JA, Kawamoto K, Buckler ES, Mitchell SE: **A**  
897 **Robust, Simple Genotyping-by-Sequencing (GBS) Approach for High Diversity**  
898 **Species.** *PLoS ONE* 2011, **6**(5): e19379.
- 899 3. Ganai MW, Durstewitz G, Polley A, Bérard A, Buckler ES, Charcosset A, Clarke JD,  
900 Graner E-M, Hansen M, Joets J *et al*: **A Large Maize (*Zea mays* L.) SNP**  
901 **Genotyping Array: Development and Germplasm Genotyping, and Genetic**  
902 **Mapping to Compare with the B73 Reference Genome.** *PLoS ONE* 2011, **6**(11):  
903 e28334.
- 904 4. Unterseer S, Bauer E, Haberer G, Seidel M, Knaak C, Ouzunova M, Meitinger T,  
905 Strom TM, Fries R, Pausch H *et al*: **A powerful tool for genome analysis in maize:**  
906 **development and evaluation of the high density 600 k SNP genotyping array.**  
907 *BMC Genomics* 2014, **15**(1):823.
- 908 5. Zhou X, Stephens M: **Genome-wide efficient mixed-model analysis for association**  
909 **studies.** *Nature Genetics* 2012, **44**:821.
- 910 6. Lippert C, Listgarten J, Liu Y, Kadie CM, Davidson RI, Heckerman D: **FaST linear**  
911 **mixed models for genome-wide association studies.** *Nature Methods* 2011, **8**:833.
- 912 7. Listgarten J, Lippert C, Kadie CM, Davidson RI, Eskin E, Heckerman D: **Improved**  
913 **linear mixed models for genome-wide association studies.** *Nature Methods* 2012,  
914 **9**:525.
- 915 8. Kang HM, Sul JH, Service SK, Zaitlen NA, Kong S-y, Freimer NB, Sabatti C, Eskin  
916 E: **Variance component model to account for sample structure in genome-wide**  
917 **association studies.** *Nature Genetics* 2010, **42**:348.
- 918 9. Flint-Garcia SA, Thornsberry JM, Buckler ES: **Structure of Linkage Disequilibrium**  
919 **in Plants.** *Annual Review of Plant Biology* 2003, **54**(1):357-374.
- 920 10. Remington DL, Thornsberry JM, Matsuoka Y, Wilson LM, Whitt SR, Doebley J,  
921 Kresovich S, Goodman MM, Buckler ES: **Structure of linkage disequilibrium and**  
922 **phenotypic associations in the maize genome.** *Proceedings of the National Academy*  
923 *of Sciences* 2001, **98**(20):11479.
- 924 11. Rincent R, Nicolas S, Bouchet S, Altmann T, Brunel D, Revilla P, Malvar RA,  
925 Moreno-Gonzalez J, Campo L, Melchinger AE *et al*: **Dent and Flint maize diversity**  
926 **panels reveal important genetic potential for increasing biomass production.**

- 927 *Theoretical and Applied Genetics* 2014, **127**(11):2313-2331.
- 928 12. Yu J, Pressoir G, Briggs WH, Vroh Bi I, Yamasaki M, Doebley JF, McMullen MD,  
929 Gaut BS, Nielsen DM, Holland JB *et al*: **A unified mixed-model method for**  
930 **association mapping that accounts for multiple levels of relatedness.** *Nature*  
931 *Genetics* 2006, **38**:203.
- 932 13. Browning SR, Browning BL: **Rapid and Accurate Haplotype Phasing and Missing-**  
933 **Data Inference for Whole-Genome Association Studies By Use of Localized**  
934 **Haplotype Clustering.** *The American Journal of Human Genetics* 2007, **81**(5):1084-  
935 1097.
- 936 14. Rincet R, Moreau L, Monod H, Kuhn E, Melchinger AE, Malvar RA, Moreno-  
937 Gonzalez J, Nicolas S, Madur D, Combes V *et al*: **Recovering Power in Association**  
938 **Mapping Panels with Variable Levels of Linkage Disequilibrium.** *Genetics* 2014,  
939 **197**(1):375.
- 940 15. Van Inghelandt D, Melchinger AE, Lebreton C, Stich B: **Population structure and**  
941 **genetic diversity in a commercial maize breeding program assessed with SSR and**  
942 **SNP markers.** *Theoretical and Applied Genetics* 2010, **120**(7):1289-1299.
- 943 16. Nicolas SD, Péros J-P, Lacombe T, Launay A, Le Paslier M-C, Bérard A, Mangin B,  
944 Valière S, Martins F, Le Cunff L *et al*: **Genetic diversity, linkage disequilibrium and**  
945 **power of a large grapevine (*Vitis vinifera* L) diversity panel newly designed for**  
946 **association studies.** *BMC Plant Biology* 2016, **16**(1):74.
- 947 17. Mangin B, Siberchicot A, Nicolas S, Doligez A, This P, Cierco-Ayrolles C: **Novel**  
948 **measures of linkage disequilibrium that correct the bias due to population**  
949 **structure and relatedness.** *Heredity* 2012, **108**:285.
- 950 18. Alexander DH, Novembre J, Lange K: **Fast model-based estimation of ancestry in**  
951 **unrelated individuals.** *Genome Research* 2009, **19**(9):1655-1664.
- 952 19. Astle W, Balding DJ: **Population Structure and Cryptic Relatedness in Genetic**  
953 **Association Studies.** *Statistical Science* 2009, **24**(4):451-471.
- 954 20. Pritchard JK, Stephens M, Rosenberg NA, Donnelly P: **Association Mapping in**  
955 **Structured Populations.** *The American Journal of Human Genetics* 2000, **67**(1):170-  
956 181.
- 957 21. VanRaden PM: **Efficient Methods to Compute Genomic Predictions.** *Journal of*  
958 *Dairy Science* 2008, **91**(11):4414-4423.
- 959 22. Bernardo R: **Genomewide Markers for Controlling Background Variation in**  
960 **Association Mapping.** *The Plant Genome* 2013, **6**.
- 961 23. Thornsberry JM, Goodman MM, Doebley J, Kresovich S, Nielsen D, Buckler Iv ES:  
962 **Dwarf8 polymorphisms associate with variation in flowering time.** *Nature*  
963 *Genetics* 2001, **28**:286.
- 964 24. Hufford MB, Lubinsky P, Pyhäjärvi T, Devengenzo MT, Ellstrand NC, Ross-Ibarra J:  
965 **The Genomic Signature of Crop-Wild Introgression in Maize.** *PLOS Genetics*  
966 2013, **9**(5):e1003477.
- 967 25. Rincet R, Laloë D, Nicolas S, Altmann T, Brunel D, Revilla P, Rodríguez VM,  
968 Moreno-Gonzalez J, Melchinger A, Bauer E *et al*: **Maximizing the Reliability of**  
969 **Genomic Selection by Optimizing the Calibration Set of Reference Individuals:**  
970 **Comparison of Methods in Two Diverse Groups of Maize Inbreds (*Zea mays* L.).**  
971 *Genetics* 2012, **192**(2):715.
- 972 26. Bouchet S, Bertin P, Presterl T, Jamin P, Coubriche D, Gouesnard B, Laborde J,  
973 Charcosset A: **Association mapping for phenology and plant architecture in maize**  
974 **shows higher power for developmental traits compared with growth influenced**

- 975 **traits. *Heredity* 2017, 118:249-259.**
- 976 27. Bouchet S, Servin B, Bertin P, Madur D, Combes V, Dumas F, Brunel D, Laborde J,  
977 Charcosset A, Nicolas S: **Adaptation of Maize to Temperate Climates: Mid-Density**  
978 **Genome-Wide Association Genetics and Diversity Patterns Reveal Key Genomic**  
979 **Regions, with a Major Contribution of the Vgt2 (ZCN8) Locus. *PLoS ONE* 2013,**  
980 **8(8):e71377.**
- 981 28. Messing J, Dooner HK: **Organization and variability of the maize genome. *Current***  
982 ***Opinion in Plant Biology* 2006, 9(2):157-163.**
- 983 29. Hu H, Schrag TA, Peis R, Unterseer S, Schipprack W, Chen S, Lai J, Yan J, Prasanna  
984 BM, Nair SK *et al*: **The Genetic Basis of Haploid Induction in Maize Identified**  
985 **with a Novel Genome-Wide Association Method. *Genetics* 2016, 202(4):1267.**
- 986 30. Millet EJ, Welcker C, Kruijjer W, Negro S, Coupel-Ledru A, Nicolas SD, Laborde J,  
987 Bauland C, Praud S, Ranc N *et al*: **Genome-Wide Analysis of Yield in Europe:**  
988 **Allelic Effects Vary with Drought and Heat Scenarios. *Plant Physiology* 2016,**  
989 **172(2):749.**
- 990 31. Crossa J, Beyene Y, Kassa S, Pérez P, Hickey JM, Chen C, de los Campos G,  
991 Burgueño J, Windhausen VS, Buckler E *et al*: **Genomic Prediction in Maize**  
992 **Breeding Populations with Genotyping-by-Sequencing. *G3: Genes|Genomes|***  
993 ***Genetics* 2013, 3(11):1903.**
- 994 32. Romay MC, Millard MJ, Glaubitz JC, Peiffer JA, Swarts KL, Casstevens TM, Elshire  
995 RJ, Acharya CB, Mitchell SE, Flint-Garcia SA *et al*: **Comprehensive genotyping of**  
996 **the USA national maize inbred seed bank. *Genome Biology* 2013, 14(6):R55.**
- 997 33. Gouesnard B, Negro S, Laffray A, Glaubitz J, Melchinger A, Revilla P, Moreno-  
998 Gonzalez J, Madur D, Combes V, Tollon-Cordet C *et al*: **Genotyping-by-sequencing**  
999 **highlights original diversity patterns within a European collection of 1191 maize**  
1000 **flint lines, as compared to the maize USDA genebank. *Theoretical and Applied***  
1001 ***Genetics* 2017, 130(10):2165-2189.**
- 1002 34. Elbasyoni IS, Lorenz AJ, Guttieri M, Frels K, Baenziger PS, Poland J, Akhunov E: **A**  
1003 **comparison between genotyping-by-sequencing and array-based scoring of SNPs**  
1004 **for genomic prediction accuracy in winter wheat. *Plant Science* 2018, 270:123-130.**
- 1005 35. Liu H, Luo X, Niu L, Xiao Y, Chen L, Liu J, Wang X, Jin M, Li W, Zhang Q *et al*:  
1006 **Distant eQTLs and Non-coding Sequences Play Critical Roles in Regulating Gene**  
1007 **Expression and Quantitative Trait Variation in Maize. *Molecular Plant* 2017,**  
1008 **10(3):414-426.**
- 1009 36. Torkamaneh D, Belzile F: **Scanning and Filling: Ultra-Dense SNP Genotyping**  
1010 **Combining Genotyping-By-Sequencing, SNP Array and Whole-Genome**  
1011 **Resequencing Data. *PLOS ONE* 2015, 10(7):e0131533.**
- 1012 37. Frascaroli E, Schrag TA, Melchinger AE: **Genetic diversity analysis of elite**  
1013 **European maize (*Zea mays* L.) inbred lines using AFLP, SSR, and SNP markers**  
1014 **reveals ascertainment bias for a subset of SNPs. *Theoretical and Applied Genetics***  
1015 **2013, 126(1):133-141.**
- 1016 38. Glaubitz JC, Casstevens TM, Lu F, Harriman J, Elshire RJ, Sun Q, Buckler ES:  
1017 **TASSEL-GBS: A High Capacity Genotyping by Sequencing Analysis Pipeline.**  
1018 ***PLoS ONE* 2014, 9(2):e90346.**
- 1019 39. Swarts K, Li H, Romero Navarro JA, An D, Romay MC, Hearne S, Acharya C,  
1020 Glaubitz JC, Mitchell S, Elshire RJ *et al*: **Novel Methods to Optimize Genotypic**  
1021 **Imputation for Low-Coverage, Next-Generation Sequence Data in Crop Plants.**  
1022 ***The Plant Genome* 2014, 7(3).**



- 1023 40. Hill WG, Weir BS: **Variations and covariances of squared linkage disequilibria in**  
1024 **finite populations.** *Theoretical Population Biology* 1988, **33**(1):54-78.
- 1025 41. Charlesworth D, Willis JH: **The genetics of inbreeding depression.** *Nature Reviews*  
1026 *Genetics* 2009, **10**:783.
- 1027 42. Hudson RR, Kaplan NL: **Deleterious background selection with recombination.**  
1028 *Genetics* 1995, **141**(4):1605.
- 1029 43. Le Gouis J, Bordes J, Ravel C, Heumez E, Faure S, Praud S, Galic N, Remoué C,  
1030 Balfourier F, Allard V *et al*: **Genome-wide association analysis to identify**  
1031 **chromosomal regions determining components of earliness in wheat.** *Theoretical*  
1032 *and Applied Genetics* 2012, **124**(3):597-611.
- 1033 44. Bauer E, Falque M, Walter H, Bauland C, Camisan C, Campo L, Meyer N, Ranc N,  
1034 Rincent R, Schipprack W *et al*: **Intraspecific variation of recombination rate in**  
1035 **maize.** *Genome Biology* 2013, **14**(9):R103.
- 1036 45. Gabriel SB, Schaffner SF, Nguyen H, Moore JM, Roy J, Blumenstiel B, Higgins J,  
1037 DeFelice M, Lochner A, Faggart M *et al*: **The Structure of Haplotype Blocks in the**  
1038 **Human Genome.** *Science* 2002, **296**(5576):2225.
- 1039 46. Wang H, Chu WS, Hemphill C, Elbein SC: **Human Resistin Gene: Molecular**  
1040 **Scanning and Evaluation of Association with Insulin Sensitivity and Type 2**  
1041 **Diabetes in Caucasians.** *The Journal of Clinical Endocrinology & Metabolism* 2002,  
1042 **87**(6):2520-2524.
- 1043 47. Liang Y, Liu Q, Wang X, Huang C, Xu G, Hey S, Lin H-Y, Li C, Xu D, Wu L *et al*:  
1044 **ZmMADS69 functions as a flowering activator through the ZmRap2.7-ZCN8**  
1045 **regulatory module and contributes to maize flowering time adaptation.** *New*  
1046 *Phytologist* 2019, **221**(4):2335-2347.
- 1047 48. Lariépe A, Mangin B, Jasson S, Combes V, Dumas F, Jamin P, Lariagon C, Jolivot D,  
1048 Madur D, Fiévet J *et al*: **The Genetic Basis of Heterosis: Multiparental**  
1049 **Quantitative Trait Loci Mapping Reveals Contrasted Levels of Apparent**  
1050 **Overdominance Among Traits of Agronomical Interest in Maize (&lt;em&gt;Zea**  
1051 **mays&lt;/em&gt; L.).** *Genetics* 2012, **190**(2):795.
- 1052 49. Butler DG, Cullis BR, Gilmour AR, Gogel BJ: **ASReml-R reference manual.** *The*  
1053 *State of Queensland, Department of Primary Industries and Fisheries, Brisbane,*  
1054 *Australia* 2009.
- 1055 50. Schnable PS, Ware D, Fulton RS, Stein JC, Wei F, Pasternak S, Liang C, Zhang J,  
1056 Fulton L, Graves TA *et al*: **The B73 Maize Genome: Complexity, Diversity, and**  
1057 **Dynamics.** *Science* 2009, **326**(5956):1112.
- 1058 51. Ganai MW, Altmann T, Röder MS: **SNP identification in crop plants.** *Current*  
1059 *Opinion in Plant Biology* 2009, **12**(2):211-217.
- 1060 52. Gore MA, Chia J-M, Elshire RJ, Sun Q, Ersoz ES, Hurwitz BL, Peiffer JA, McMullen  
1061 MD, Grills GS, Ross-Ibarra J *et al*: **A First-Generation Haplotype Map of Maize.**  
1062 *Science* 2009, **326**(5956):1115.
- 1063 53. Nei M: **Estimation of Average Heterozygosity and Genetic Distance from a Small**  
1064 **Number of Individuals.** *Genetics* 1978, **89**(3):583.
- 1065 54. Gower JC: **Some distance properties of latent root and vector methods used in**  
1066 **multivariate analysis.** *Biometrika* 1966, **53**(3-4):325-338.
- 1067 55. Hill WG, Robertson A: **Linkage disequilibrium in finite populations.** *Theoretical*  
1068 *and Applied Genetics* 1968, **38**(6):226-231.
- 1069 56. Moskvina V, Schmidt KM: **On multiple-testing correction in genome-wide**  
1070 **association studies.** *Genetic Epidemiology* 2008, **32**(6):567-573.

- 1071 57. Gao X, Becker LC, Becker DM, Starmer JD, Province MA: **Avoiding the high**  
1072 **Bonferroni penalty in genome-wide association studies.** *Genetic Epidemiology*  
1073 2010, **34**(1):100-105.
- 1074 58. Gao X, Starmer J, Martin ER: **A multiple testing correction method for genetic**  
1075 **association studies using correlated single nucleotide polymorphisms.** *Genetic*  
1076 *Epidemiology* 2008, **32**(4):361-369.
- 1077 59. R Core Team: **R: A language and environment for statistical computing.** *R*  
1078 *Foundation for Statistical Computing, Vienna, Austria* 2015:URL [https://www.R-](https://www.R-project.org/)  
1079 [project.org/](https://www.R-project.org/).
- 1080 60. Giraud H, Bauland C, Falque M, Madur D, Combes V, Jamin P, Monteil C, Laborde J,  
1081 Palaffre C, Gaillard A *et al*: **Reciprocal Genetics: Identifying QTL for General and**  
1082 **Specific Combining Abilities in Hybrids Between Multiparental Populations from**  
1083 **Two Maize (*Zea mays* L.) Heterotic Groups.** *Genetics* 2017, **207**(3):1167.
- 1084 61. Cormier F, Le Gouis J, Dubreuil P, Lafarge S, Praud S: **A genome-wide identification**  
1085 **of chromosomal regions determining nitrogen use efficiency components in wheat**  
1086 **(*Triticum aestivum* L.).** *Theoretical and Applied Genetics* 2014, **127**(12):2679-2693.
- 1087 62. Springer NM, Ying K, Fu Y, Ji T, Yeh C-T, Jia Y, Wu W, Richmond T, Kitzman J,  
1088 Rosenbaum H *et al*: **Maize Inbreds Exhibit High Levels of Copy Number Variation**  
1089 **(CNV) and Presence/Absence Variation (PAV) in Genome Content.** *PLOS*  
1090 *Genetics* 2009, **5**(11):e1000734.
- 1091 63. Darvasi A, Weinreb A, Minke V, Weller JI, Soller M: **Detecting marker-QTL linkage**  
1092 **and estimating QTL gene effect and map location using a saturated genetic map.**  
1093 *Genetics* 1993, **134**(3):943.
- 1094  
1095

## 1096 **Figure legends**

1097 **Figure 1:** Variation of the markers density, the recombination rate and the genome coverage  
1098 in non-overlapping 2 Mbp windows along chromosome 3. Markers have MAF above 5%. Top  
1099 panel shows the variation of SNP number. In the bottom panel, dotted line represents the  
1100 variation of recombination rate (cM / Mbp) and solid lines the proportion of genome covered  
1101 by the SNPs using the cumulated length of physical LD windows around each SNP in each  
1102 2Mbp-windows. In these two panels, green, blue, red and black lines represent variation for  
1103 GBS, 600K, 50K and combined technologies, respectively. Vertical dotted gray lines indicate  
1104 limits of centromeric regions. Vertical lines between the two panels indicate the position of  
1105 QTLs for flowering time (DTA), grain yield (GY) and Plant Height (PHT). Green, blue, red



1106 vertical lines indicate QTLs detected only by GBS, 600K and 50K technologies, respectively.  
1107 Grey lines indicated QTLs detected by at least two technologies. Only QTL including a  
1108 marker associated with  $-\log_{10}(p\text{val})$  above 6 were shown.

1109 **Figure 2:** Principal coordinate analysis (PCoA) of the DROPS panel. The PCoA was based on  
1110 the covariance matrix  $K\_Freq$  estimated from the 50K Illumina array. The genetic groups  
1111 identified by ADMIXTURE ( $N_Q = 4$ ) are colored. Three key founders are indicated (Iodent:  
1112 PH207 in red, Stiff Stalk: B73 in blueviolet, Lancaster: Mo17 in turquoise).

1113 **Figure 3:** Linkage disequilibrium based approach to delineate a physical window around each  
1114 SNP, exemplified with chromosome 3. Linkage disequilibrium (LD) windows were defined  
1115 for each SNP based on physical LD extent in low recombinogenic regions (left part) and  
1116 based on genetic LD extent in high recombinogenic regions (right part). These LD windows  
1117 were used (i) to group significant SNPs into QTLs when they overlapped, (ii) to estimate  
1118 genome coverage region covered by LD windows around SNPs, and (iii) identify putative  
1119 genes underlying QTLs involved in trait variations.

1120 **Figure 4:** Complementarity of the three technologies to detect QTLs. The numbers of specific  
1121 QTLs detected by each technology for the three traits (flowering time, plant height, grain  
1122 yield) are shown.

1123 **Figure 5:** Complementarity of QTLs detection between the 600K array and the GBS for two  
1124 regions (QTL 32/QTL95). **(a)** Manhattan plot of the  $-\log_{10}(p\text{-value})$  along the genome. Dotted  
1125 red lines correspond to QTL32 and QTL95 located on chromosome 1 and 3, respectively, for  
1126 the flowering time in one environment (Ner13R). **(b)** Local manhattan plot of the  $-\log_{10}(p\text{-}$   
1127  $value)$  (top) and linkage disequilibrium corrected by the kinship ( $r^2K$ ) (bottom) of all SNPs  
1128 with the strongest associated marker within QTL 32 (left) and QTL 95 (right). Colored  
1129 vertical lines between manhattan plot and linkage disequilibrium plot represents the

1130 distribution of markers for different technologies. Dotted lines between panels b and c linked  
1131 the first marker, the most associated marker, and the last marker of each QTL (c) Local  
1132 haplotypes displayed by all SNPs within the QTLs 32 (left) and 95 (right) with MAF>5%.  
1133 Inbred lines are in rows and SNPs are in columns. Inbred lines were ordered by hierarchical  
1134 clustering based on local dissimilarity estimated by all SNPs within each QTL. Genotyping  
1135 matrix is colored according to their allelic dose at each SNP. Red and black represent  
1136 homozygotes and gray represent heterozygotes. The associated peaks (red vertical lines) and  
1137 other associated SNPs with  $-\log_{10}(p\text{-value}) > 5$  (orange vertical lines) are indicated above the  
1138 genotyping matrix. H1, H2, H3, H4, H5 represent the 5 and 3 haplotypes obtained by cutting  
1139 the dendograms with the most 5 and 3 dissimilar clusters within QTL32 and QTL95,  
1140 respectively.

1141

## 1142 **Additional file legends**

### 1143 **Additional file 1 (.docx):**

1144 **Figure S1:** Different approaches used to impute missing data of the GBS. We considered the  
1145 direct reads from GBS (**GBS<sub>1</sub>**) and four approaches for imputation (**GBS<sub>2</sub>** to **GBS<sub>5</sub>**). **GBS<sub>2</sub>**  
1146 approach consisted in one imputation step from the direct read by Cornell University, using  
1147 *TASSEL* software, but missing data was still present. **GBS<sub>3</sub>** approach consisted in a genotype  
1148 imputation of the whole missing data of the direct read by *Beagle v3*. In **GBS<sub>4</sub>**, genotype  
1149 imputation by *Beagle* was performed on Cornell imputed data after replacing the  
1150 heterozygous genotypes into missing data. **GBS<sub>5</sub>**, consisted in homozygous genotypes of  
1151 **GBS<sub>2</sub>** completed by values imputed in **GBS<sub>3</sub>**.

### 1152 **Additional file 2 (.docx):**

1153 **Figure S2:** Comparison of genotyping data between 50K and 600K arrays, and GBS. (a)  
1154 Distribution of minor allele frequency per SNP before filtering (monomorphic SNPs  
1155 removed). (b) Distribution of SNP missing data proportion for the 50K array, 600K array,  
1156 GBS direct reads (GBS<sub>1</sub>) and GBS after imputation by Cornell Institute (GBS<sub>2</sub>, note that the  
1157 scale of the x-axes is different). (c) Relatedness distribution (Identity-By-State, IBS) after QC  
1158 filtering with MAF $\geq$ 1% (IBS using GBS<sub>1</sub> was not estimated because of the low calling rate).

1159 **Additional file 3 (.pdf):**

1160 **Figure S3:** Variation of the markers density, the recombination rate and the genome coverage  
1161 in non-overlapping 2 Mbp windows along each chromosome except chromosome 3 (presented  
1162 in Figure 1). Markers have MAF above 5%. Top panel shows the variation of SNP number. In  
1163 the bottom panel, dotted line represents the variation of recombination rate (cM / Mbp) and  
1164 solid lines the proportion of genome covered by the SNPs using the cumulated length of  
1165 physical LD windows around each SNP in each 2Mbp-windows. In these two panel, green,  
1166 blue, red and black lines represent variation for GBS, 600K, 50K and combined technologies,  
1167 respectively. Vertical dotted gray lines indicate limits of centromeric regions. Vertical lines  
1168 between the two panels indicate the position of QTLs for flowering time (DTA), grain yield  
1169 (GY) and Plant Height (PHT). Green, blue, red vertical lines indicate QTLs detected only by  
1170 GBS, 600K and 50K technologies, respectively. Grey vertical lines indicate QTL detected by  
1171 at least two technologies. Only QTL including a marker associated with  $-\log_{10}(pval)$  above 6  
1172 were shown.

1173 **Additional file 4 (.docx):**

1174 **Figure S4:** Contribution of four ancestral populations to 247 inbred lines after ADMIXTURE  
1175 analysis. Markers from the 50K (top), 600K (middle) and GBS (bottom) were used. One  
1176 vertical bar corresponds to one individual. Lines were ordered according to contributions

1177 observed for the 50K. From left to right, we have Stiff Stalk lines type B73 and B14a (blue),  
1178 Iodent lines type PH207 (red), Lancaster lines type Mo17 and Oh43 (turquoise), a group of  
1179 lines assembling W117, F7057 type lines (green).

1180 **Additional file 5 (.docx):**

1181 **Figure S5:** Correlation between kinship matrix estimated by different technologies.  
1182 Correlation ( $r$ ) between the IBS and IBD ( $K\_Freq$ ) for each technology (A) and correlation of  
1183 IBD (B) and IBS (D) between the three technologies (after imputation). (C) Correlation of  
1184 IBD between the three technologies after removing the excess of rare alleles in the GBS to  
1185 have the same distribution of MAF as in the 50K and the 600K. The red line is the bisector.

1186 **Additional file 6 (.docx):**

1187 **Figure S6:** Heatmap of genome-wide linkage disequilibrium (LD) between all markers within  
1188 and between chromosomes using PANZEA SNPs from the 50K. All SNPs were ordered  
1189 according to their position on the genome. Dots represent LD between two loci and were  
1190 colored according to their strength. Classical LD measurement  $r^2$  between loci were  
1191 represented within triangle below the diagonal. Linkage disequilibrium corrected for structure  
1192 ( $r^2S$ , A), relatedness ( $r^2K$ , B) or both ( $r^2KS$ , C) were represented within triangle above the  
1193 diagonal.

1194 **Additional file 7 (.pdf):**

1195 **Figure S7:** QTL limits obtained by the  $LD\_Adj$  approach projected on heatmaps representing  
1196 the level of LD between associated SNPs for each trait (DTA: male flowering time, plantHT:  
1197 plant height and GY: grain yield) for each chromosome. Upper and lower triangles on the  
1198 heatmaps represent the  $r^2$  and  $r^2K$  values between associated SNPs, respectively. Linkage  
1199 disequilibrium between loci was colored according to values from weak LD (yellow) to high  
1200 LD (red). The significant markers were ordered according to their physical positions on the

1201 chromosome and were represented by ticks on the four sides of the heatmaps. Limits of QTLs  
1202 were displayed by gray dotted lines. QTL numbers were indicated in gray on the top and the  
1203 right of each heatmap.

1204 **Additional file 8 (.pdf):**

1205 **Figure S8-LD\_Windows:** QTL limits obtained by the *LD\_win* approach projected on  
1206 heatmaps representing the level of LD between associated SNPs for each trait (DTA: male  
1207 flowering time, plantHT: plant height and GY: grain yield) and each chromosome. Upper and  
1208 lower triangles on the heatmaps represented the  $r^2$  and  $r^2K$  values between associated SNPs,  
1209 respectively. Linkage disequilibrium between loci was colored according to values from weak  
1210 LD (yellow) to high LD (red). The significant markers were ordered according to their  
1211 physical positions on the chromosome and were represented by ticks on the four sides of the  
1212 heatmaps. Limits of QTLs were displayed by gray dotted lines. QTL numbers were indicated  
1213 in gray on the top and the right of each heatmap.

1214 **Additional file 9 (.docx):**

1215 **Figure S9:** Number of significant SNPs (blue line) and QTLs (red line) identified as a  
1216 function of SNP density (x-axis) for the three traits (DTA, male flowering time; plantHT,  
1217 plant height; GY, grain yield).

1218 **Additional file 10 (.csv):**

1219 **Table S1:** Summary of all the QTLs identified for the male flowering time (DTA), plant  
1220 height (plantHT) and grain yield (GY). “LowerLimit” and “UpperLimit” columns are the  
1221 lower and upper physical limits for each QTL. The “Rec” column indicates if the QTL is  
1222 located in a high or low region of recombination. “NbSNP50”, “LogPvaMax50”,  
1223 “NbSNP600”, “LogPvaMax600”, “NbSNPGBS”, “LogPvaMaxGBS” are the number of  
1224 significant SNPs and the most significant  $-\log_{10}(Pval)$  within the QTL for each technology

1225 across all environments. The physical position (“PosMax”), the proportion of the variance  
1226 explained (“R2\_LDMax”) and the effect (“EffectMax”) of the most significant SNP within  
1227 the QTL is shown. “NbDiffEnv” gives the number of different situations that detected the  
1228 QTL.

1229 **Additional file 11 (.docx):**

1230 **Figure S10:** Examples of QTL detection on Chromosome 3, 6 and 8 for the different traits.  
1231 The top panel represents the distribution of the QTLs along the chromosome of interest, for  
1232 the different technologies. The vertical red line in this panel localizes the SNP chosen as  
1233 reference for the QTL (marker with the strongest association). The middle panel is a zoom in  
1234 the vicinity of the reference SNP, showing the Local distribution of the  $-\log_{10}(p\text{-value})$ . The  
1235 bottom panel is the same zoom as the middle panel and shows the local linkage disequilibrium  
1236 corrected by the kinship ( $r^2k$ ) of all SNPs, within this region, within the reference SNP. Ticks  
1237 on different x-axes show the marker density of the three technologies (red for the 50K, blue  
1238 for the 600K and green for the GBS).

1239 **Additional File 12 (.pdf)**

1240 **Figure S11:** Effect of minor allelic frequency distribution, SNP distributions along the  
1241 genome and SNP densities on the number of associated SNP and QTL detected. Boxplot were  
1242 drawn on 100 sets of 50 000 to 250 000 markers sampled according to different MAF  
1243 distributions (A, B) and different SNP distributions along the genome (C, D). A, C: number of  
1244 SNP associated; B, D: Number of QTL detected. In A and B, 600K\_MAF (yellow),  
1245 GBS\_MAF (green), Low\_MAF (cyan), Flat\_MAF (blue), High\_MAF (pink) on x axis  
1246 indicate boxplots corresponding to MAF distribution similar to 600K, similar to GBS, skewed  
1247 towards low MAF, flat MAF and skewed toward high MAF, respectively. In C and D,  
1248 Dens\_50K (red), Dens\_600K (yellow), Dens\_GBS (cyan), Dens\_Gen (blue), Dens\_Phys

1249 (pink) on x axis indicate distribution of SNPs along the genome corresponding to 50K, GBS,  
1250 600K, even genetic and physical distances, respectively. For A, B, C and D, modalities  
1251 indicated as “Random” in x axis correspond to random sample of SNP. Number of markers  
1252 for each boxplot are indicated after the point.

1253 **Additional file 13 (.pdf)**

1254 **Figure S12:** Distribution of markers, associations and QTLs according to MAF for 50K,  
1255 600K GBS, and ALL technologies. A) Number of markers, B) Proportion of markers, C)  
1256 Proportion of Association, D) Proportion of QTLs

1257 **Additional file 14 (.docx):**

1258 **Figure S13:** Colocalization of QTLs between the traits. Number of QTLs specific and shared  
1259 by the three traits across all environments. Note that several QTLs from one trait were  
1260 sometimes included in a single QTL of another trait.

1261 **Additional file 15:**

1262 **Table S2:** Stability of QTLs across environments for the three traits (DTA: male flowering  
1263 time, plantHT: Plant Height, GY: Grain Yield) and all traits. “Env. Nb” indicates the number  
1264 of environment in which a QTL was detected. Next four columns indicate the number of QTL  
1265 corresponding to each cartegory

1266 **Additional file 16:**

1267 **Table S3:** Proportion of low and high recombination regions, recombination rate and  
1268 percentage of QTLs located in these regions for the three traits.

1269 “Chr” indicates the chromosome. Physical and genetic size columns indicated the size of each  
1270 chromosome in bp and cM, respectively. Average recombination rate (“RecRate”) and  
1271 proportion of the physical (“Phys”) and genetic (“Genetic) map in high recombination regions  
1272 (“HighRec”, >0.5 cM / Mbp) for each chromosome are shown. Percentage of QTL in high  
1273 recombination regions were displayed for three traits (DTA PlantHT, GY)

1274

1275

1276 **Additional file 17 (.xlsx):**

1277 **Table S4:** Description of inbred lines. Variety and accession along with the breeders, seeds  
1278 providers and genetic groups obtained using ADMIXTURE for K=4 (Stiff Stalk, Iodent,  
1279 Lancaster, Other).

1280 **Additional file 18 (.docx):**

1281 **Table S5:** Narrow sense heritability ( $h^2$ ) and variance components ( $V_g$ , genetic variance;  $V_e$ ,  
1282 residual variance). The heritability and variance components were estimated for all traits  
1283 (grain yield, male flowering time and plant height) using the R package Heritability [1].

1284 **Additional file 19(.docx):**

1285 **Notes S1:** Differences between arrays and GBS discovery / pipelines and.

1286 **Additional file 20:**

1287 **Table S6:** Number of SNPs called, after QC filtering ( $MAF > 1\%$ ) and useful for GWAS  
1288 ( $MAF \geq 5\%$ ). Note that GBS1 have SNPs with 100% missing genotypes which were removed  
1289 while GBS2 used external haplotype library which allow to impute loci with 100% missing  
1290 data. It conducted to a smaller number of SNPs for GBS1 than GBS2.

1291 **Additional file 21:**

1292 **Notes S2:** GWAS statistical models and effects of confounding factors on GWAS.

1293



# Chromosome 3

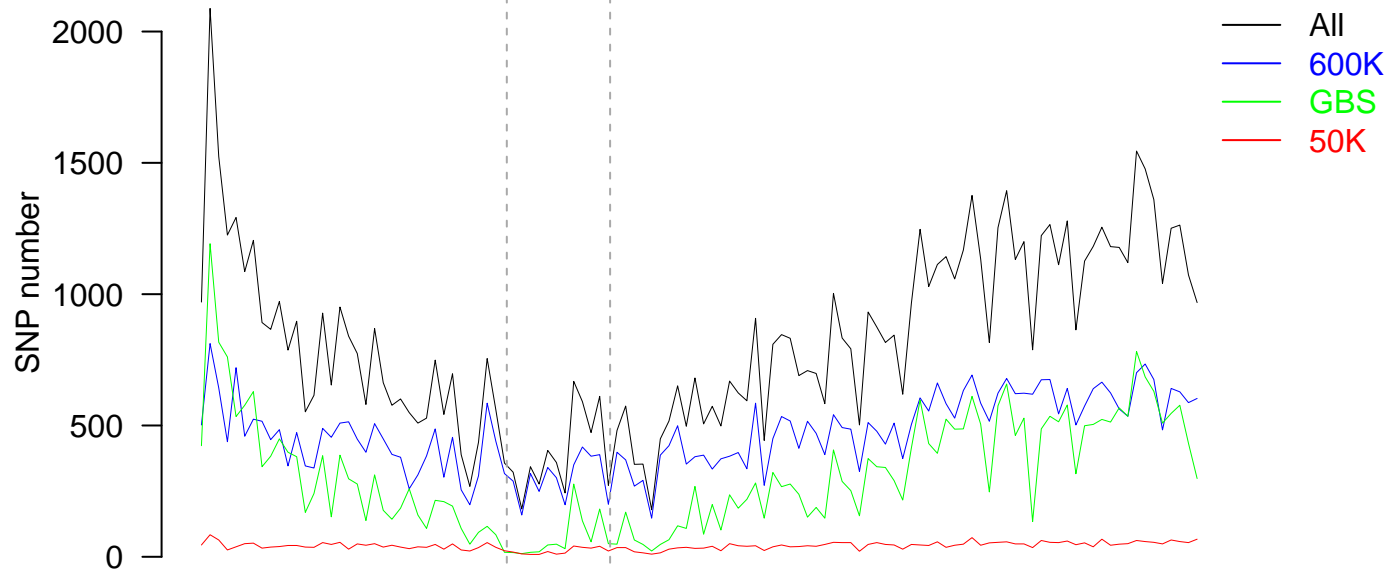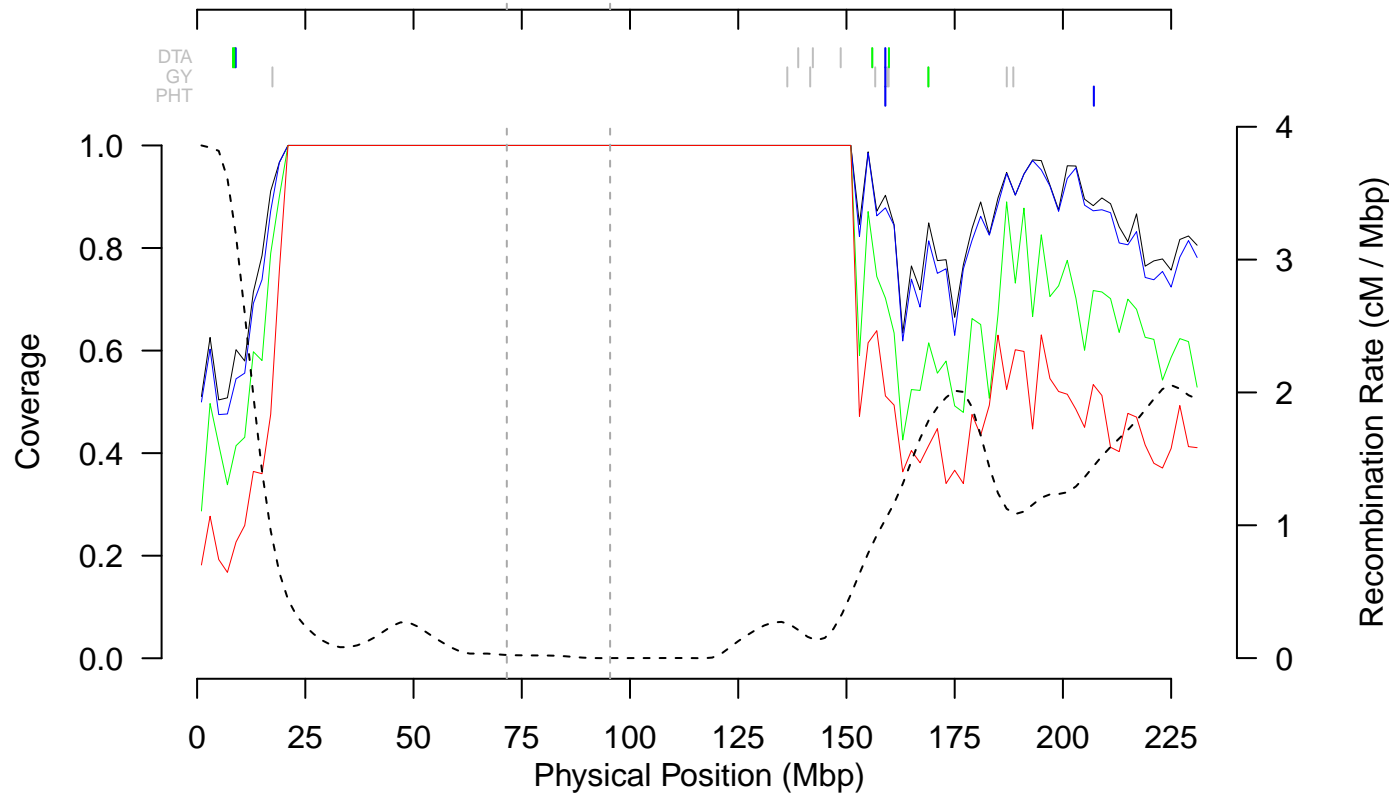

**Figure 1:** Variation of the markers density, the recombination rate and the genome coverage in non-overlapping 2 Mbp windows along chromosome 3. Markers have MAF above 5%. Top panel shows the variation of SNP number. In the bottom panel, dotted line represents the variation of recombination rate (cM / Mbp) and solid lines the proportion of genome covered by the SNPs using the cumulated length of physical LD windows around each SNP in each 2Mbp-windows. In these two panels, green, blue, red and black lines represent variation for GBS, 600K, 50K and combined technologies, respectively. Vertical dotted gray lines indicate limits of centromeric regions. Vertical lines between the two panels indicate the position of QTLs for flowering time (DTA), grain yield (GY) and Plant Height (PHT). Green, blue, red vertical lines indicate QTLs detected only by GBS, 600K and 50K technologies, respectively. Grey lines indicated QTLs detected by at least two technologies. Only QTL including a marker associated with  $-\log_{10}(p\text{val})$  above 6 were shown.

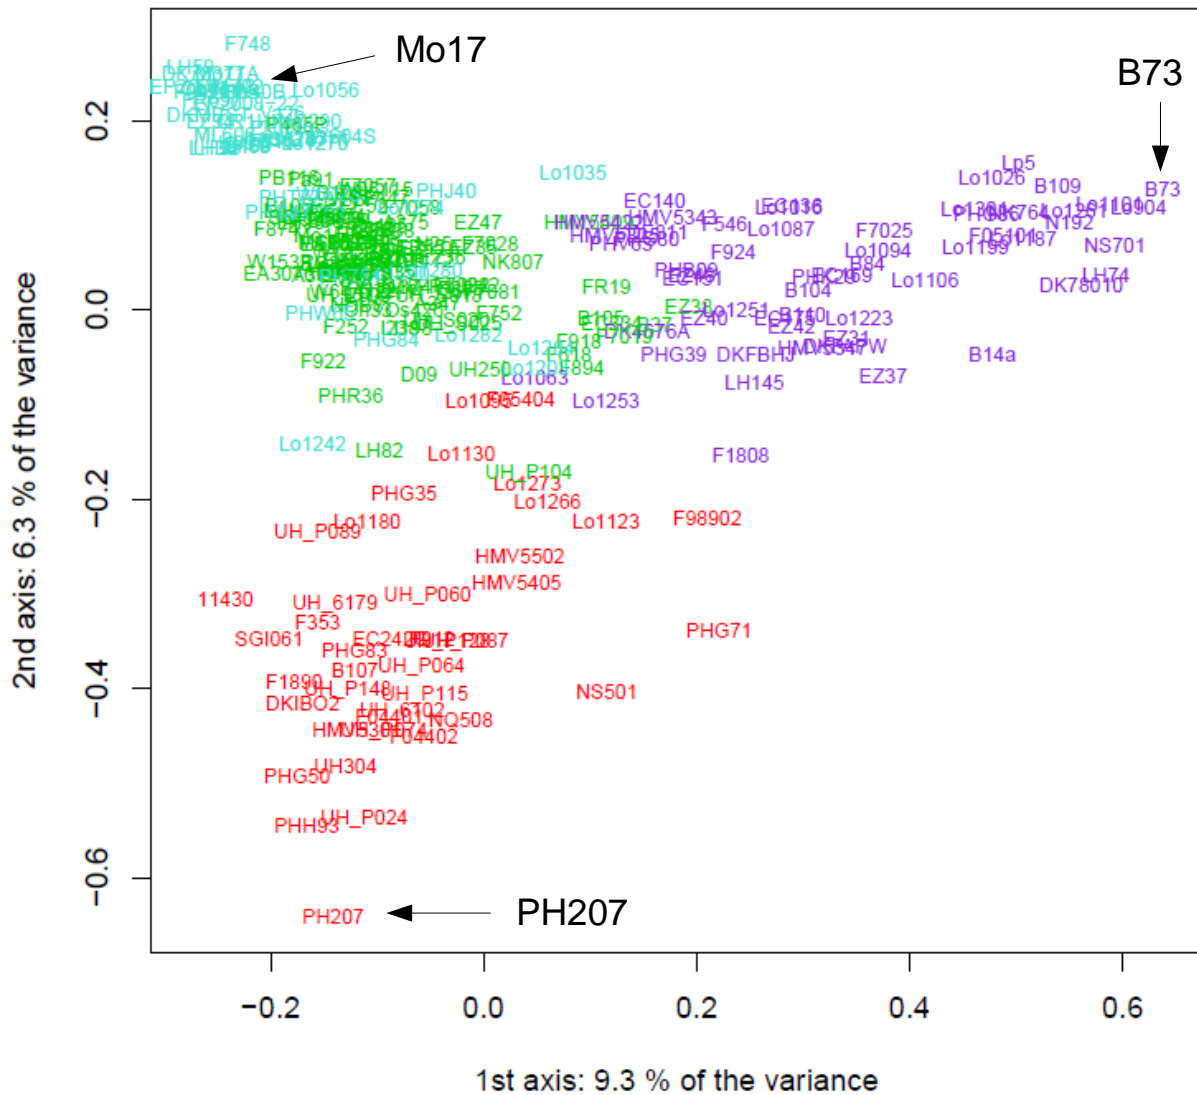

**Figure 2:** Principal coordinate analyses (PCoA) of the DROPS panel. The PCoA were based on the covariance matrix  $K_{Freq}$  estimated from the 50K Illumina array. The genetic groups identified by ADMIXTURE ( $N_Q = 4$ ) are colored. Three key founders are indicated (Iodent: PH207 in red, Stiff Stalk: B73 in blueviolet, Lancaster: Mo17 in turquoise).

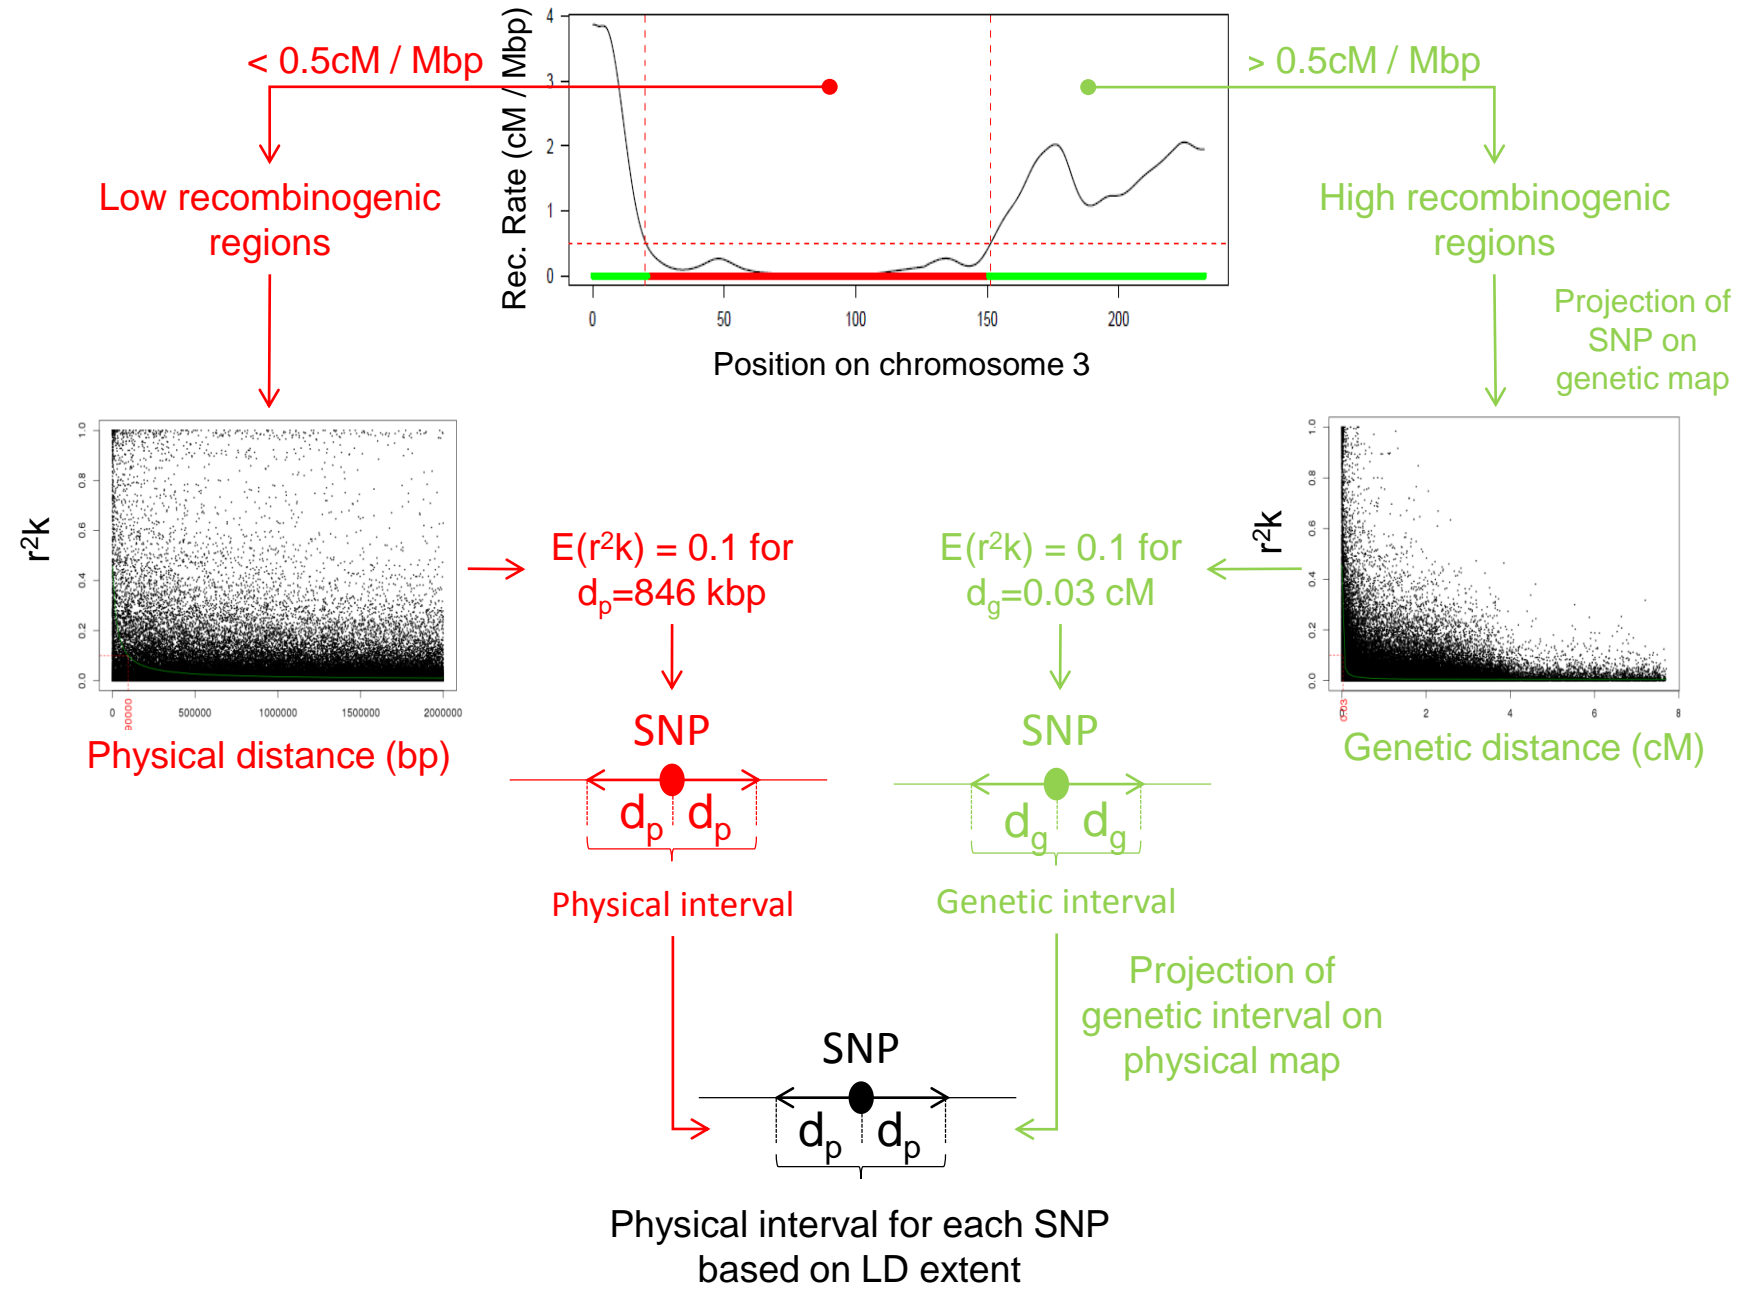

**Figure 3:** Linkage disequilibrium based approach to delineate a physical window around each SNP, exemplified with chromosome 3. Linkage disequilibrium (LD) windows were defined for each SNP based on physical LD extent in low recombinogenic regions (left part) and based on genetic LD extent in high recombinogenic regions (right part). These LD windows were used (i) to group significant SNPs into QTLs when they overlapped, (ii) to estimate genome coverage region covered by LD windows around SNPs, and (iii) identify putative genes underlying QTLs involved in trait variations.

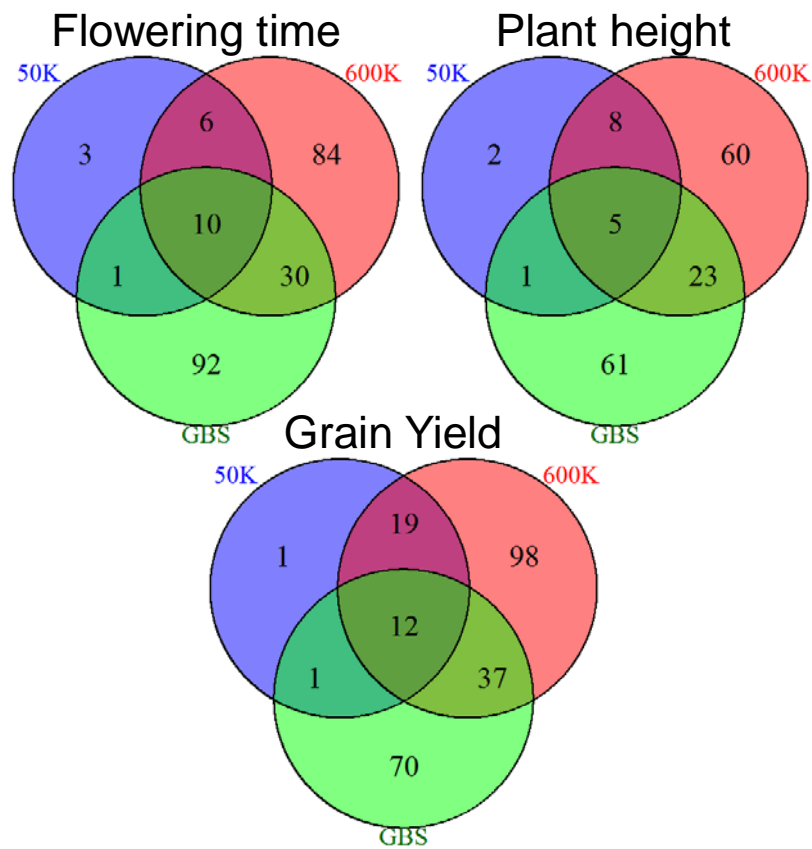

**Figure 4:** Complementarity of the three technologies to detect QTLs. The numbers of specific QTLs detected by each technology for the three traits (flowering time, plant height, grain yield) are shown.

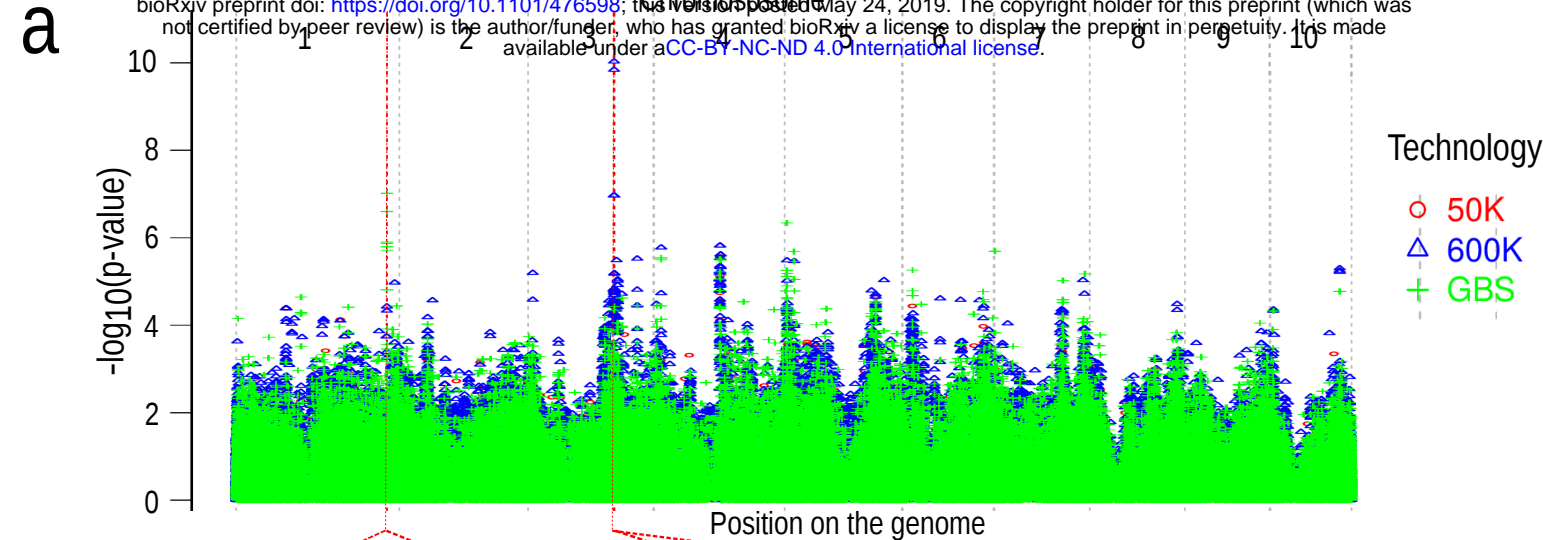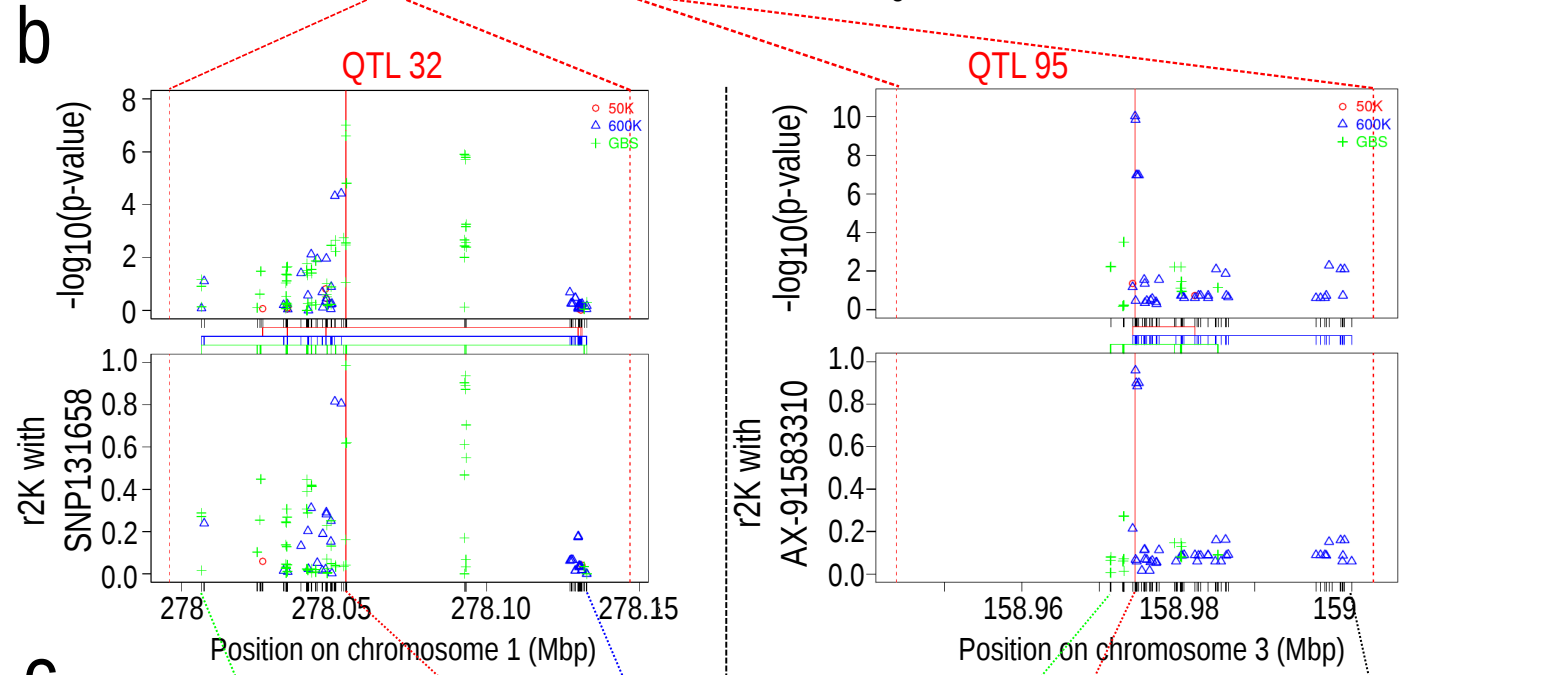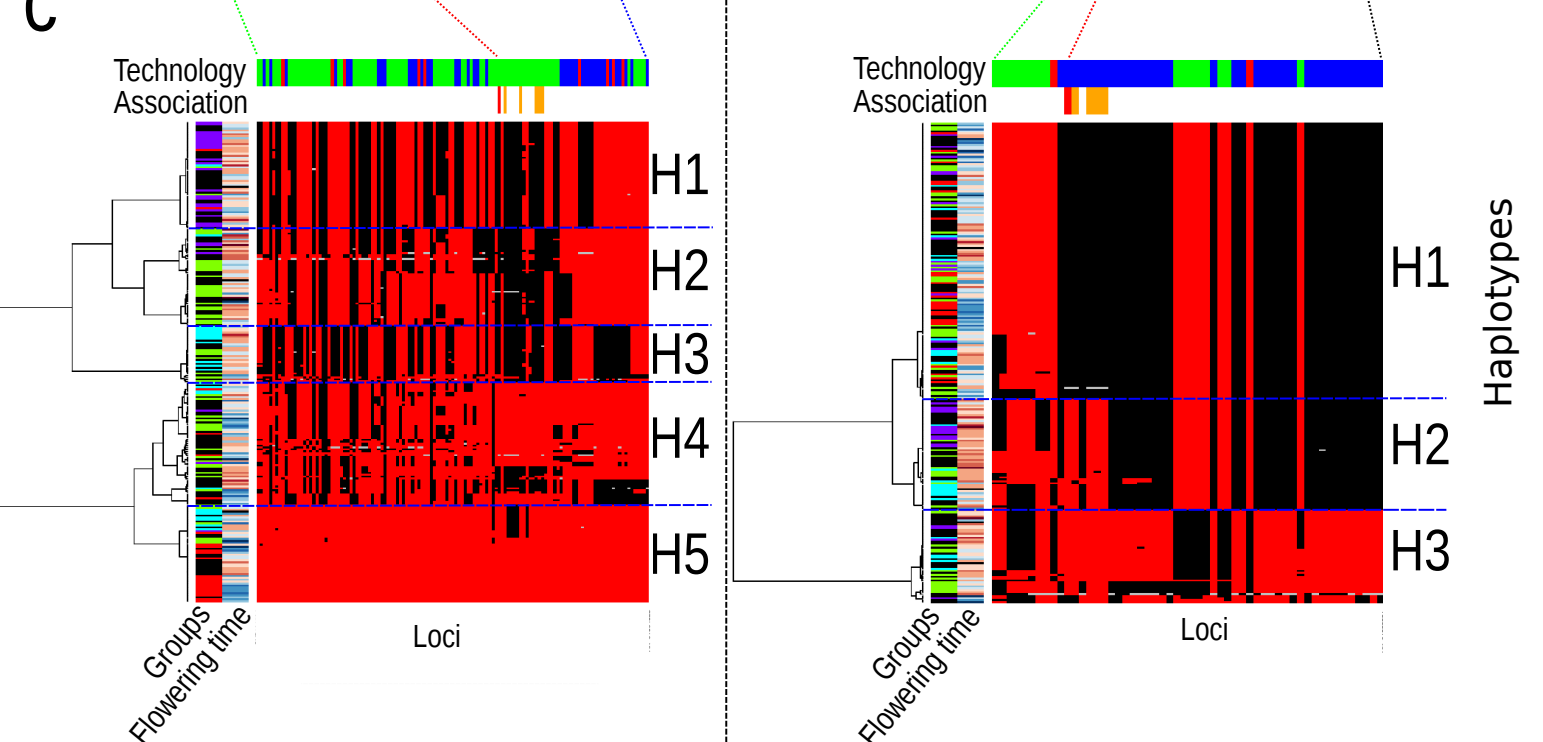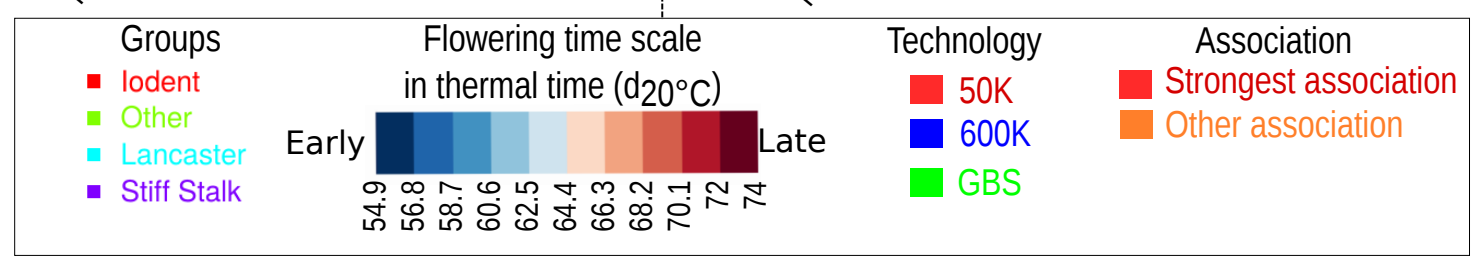

**Figure 5:** Complementarity of QTLs detection between the 600K array and the GBS for two regions (QTL 32/QTL95). **(a)** Manhattan plot of the  $-\log_{10}(p\text{-value})$  along the genome. Dotted red lines correspond to QTL32 and QTL95 located on chromosome 1 and 3, respectively, for the flowering time in one environment (Ner13R). **(b)** Local manhattan plot of the  $-\log_{10}(p\text{-value})$  (top) and linkage disequilibrium corrected by the kinship ( $r^2K$ ) (bottom) of all SNPs with the strongest associated marker within QTL 32 (left) and QTL 95 (right). Colored vertical lines between manhattan plot and linkage disequilibrium plot represents the distribution of markers for different technologies. Dotted lines between panels b and c linked the first marker, the most associated marker, and the last marker of each QTL **(c)** Local haplotypes displayed by all SNPs within the QTLs 32 (left) and 95 (right) with MAF>5%. Inbred lines are in rows and SNPs are in columns. Inbred lines were ordered by hierarchical clustering based on local dissimilarity estimated by all SNPs within each QTL. Genotyping matrix is colored according to their allelic dose at each SNP. Red and black represent homozygotes and gray represent heterozygotes. The associated peaks (red vertical lines) and other associated SNPs with  $-\log_{10}(p\text{-value}) > 5$  (orange vertical lines) are indicated above the genotyping matrix. H1, H2, H3, H4, H5 represent the 5 and 3 haplotypes obtained by cutting the dendograms with the most 5 and 3 dissimilar clusters within QTL32 and QTL95, respectively.
