1           **Genotyping-by-sequencing and microarrays are complementary for detecting**  
2           **quantitative trait loci by tagging different haplotypes in association studies**

3

4   Sandra Silvia Negro<sup>1,3</sup>, Emilie Millet<sup>2,4</sup>, Delphine Madur<sup>1</sup>, Cyril Bauland<sup>1</sup>, Valérie Combes<sup>1</sup>,  
5           Claude Welcker<sup>2</sup>, François Tardieu<sup>2</sup>, Alain Charcosset<sup>1</sup>, Stéphane Dimitri Nicolas<sup>1</sup>

6

7   Affiliations :

8   <sup>1</sup> GQE – Le Moulon, INRA, Univ. Paris-Sud, CNRS, AgroParisTech, Université Paris-Saclay,  
9   91190 Gif-sur-Yvette, France.

10 <sup>2</sup> Laboratoire d'Ecophysiologie des Plantes sous Stress Environnementaux (LEPSE),  
11 UMR759, INRA-SupAgro, 34060 Montpellier, France.

12 <sup>3</sup> Present address: GIGA-R Medical Genomics, University of Liège, Belgium.

13 <sup>4</sup> Present address: Biometris, Department of Plant Science, Wageningen University &  
14 Research, 6700 AA Wageningen, The Netherlands.

15

16   E-mail addresses:

17   [snegro@uliege.be](mailto:snegro@uliege.be); [emilie.millet@wur.nl](mailto:emilie.millet@wur.nl); [delphine.madur@inra.fr](mailto:delphine.madur@inra.fr); [cyril.bauland@inra.fr](mailto:cyril.bauland@inra.fr);

18   [valerie.combes@inra.fr](mailto:valerie.combes@inra.fr); [claudewelcker@inra.fr](mailto:claudewelcker@inra.fr); [francois.tardieu@inra.fr](mailto:francois.tardieu@inra.fr);

19   [alain.charcosset@inra.fr](mailto:alain.charcosset@inra.fr); [stephane.nicolas@inra.fr](mailto:stephane.nicolas@inra.fr)

20   Corresponding author:

21   [stephane.nicolas@inra.fr](mailto:stephane.nicolas@inra.fr)

22

23        **Abstract**

24        **Background:** Single Nucleotide Polymorphism (SNP) array and re-sequencing technologies  
25        have different properties (*e.g.* calling rate, minor allele frequency profile) and drawback (*e.g.*  
26        ascertainment bias), which lead us to study the complementarity and consequences of using  
27        them separately or combined in diversity analyses and Genome-Wide Association Studies  
28        (GWAS). We performed GWAS on three traits (grain yield, plant height and male flowering  
29        time) measured in 22 environments on a panel of 247 diverse dent maize inbred lines using  
30        three genotyping technologies (Genotyping-By-Sequencing, Illumina Infinium 50K and  
31        Affymetrix Axiom 600K arrays).

32        **Results:** The effects of ascertainment bias of both arrays were negligible for deciphering  
33        global genetic trends of diversity in this panel and for estimating relatedness. We developed  
34        an original approach based on linkage disequilibrium (LD) extent in order to determine  
35        whether SNPs significantly associated with a trait and that are physically linked should be  
36        considered as a single QTL or several independent QTLs. Using this approach, we showed  
37        that the combination of the three technologies, which have different SNP distribution and  
38        density, allowed us to detect more Quantitative Trait Loci (QTLs, gain in power) and  
39        potentially refine the localization of the causal polymorphisms (gain in position).

40        **Conclusions:** Conceptually different technologies are complementary for detecting QTLs by  
41        tagging different haplotypes in association studies. Considering LD, marker density and the  
42        combination of different technologies (arrays and re-sequencing), the genotypic data presently  
43        available were most likely enough to well represent polymorphisms in the centromeric  
44        regions, whereas using more markers would be beneficial for telomeric regions.

45        **Keywords:** GWAS, linkage disequilibrium, genome coverage, maize, high-throughput  
46        genotyping technologies.

## 47      **Background**

48      Understanding the genetic bases of complex traits involved in the adaptation to biotic and  
49      abiotic stress in plants is a pressing concern, with world-wide drought due to climate change  
50      as a major source of human food and agriculture threats. Recent progress in next generation  
51      sequencing and genotyping array technologies contribute to a better understanding of the  
52      genetic basis of quantitative trait variation by performing Genome-Wide Association Studies  
53      (GWAS) on large diversity panels [1]. Single Nucleotide Polymorphism (SNP)-based  
54      techniques became the most commonly used genotyping methods for GWAS because SNPs  
55      are cheap, numerous, codominant and can be automatically analysed with SNP-arrays or  
56      produced by genotyping-by-sequencing (GBS), or sequencing [2-4]. The decreasing cost of  
57      genotyping technologies have led to an exponential increase in the number of markers used  
58      for the GWAS in association panels, thereby raising the question of computation time to  
59      perform the association tests. Computational issues were addressed by using either  
60      approximate methods by avoiding re-estimating variance component for each SNP [5] or  
61      exact methods using mathematical tools for sparing time in matrix inversion [6, 7]. It is  
62      noteworthy that using approximate computation in GWAS can produce inaccurate p-values  
63      when the SNP effect size is large or/and when the sample structure is strong [8].

64      Several causes may impact the power of Quantitative Trait Locus (QTL, locus involved in  
65      quantitative trait variation) detection in GWAS. Highly diverse panels have in general  
66      undergone multiple historical recombinations, leading to a low extent of linkage  
67      disequilibrium (LD). However, these panels can present different average and local patterns  
68      of LD [9-11]. A high marker density and a proper distribution of SNPs are therefore essential  
69      to capture causal polymorphisms. Furthermore, minor allele frequencies (MAF), population  
70      stratification and cryptic relatedness are three other important parameters affecting power and

71 false positive detection [12, 14]. These last two factors are substantial in several cultivated  
72 species such as maize [15] and grapevine [16], and their impact on LD can be statistically  
73 evaluated [17]. Population structure and kinship can be estimated using molecular markers  
74 [18-21] and can be modelled to efficiently detect marker-trait associations due to linkage only  
75 [12, 22, 23]. These advances have largely increased the power and effectiveness of linear  
76 mixed models that can now efficiently account for population structure and relatedness in  
77 GWAS [12, 8].

78

79 In maize, an Illumina Infinium HD 50,000 SNP-array (50K array) was developed by Ganai *et*  
80 *al.* [3] and has been used extensively for diversity and association studies [24, 25]. For  
81 example, GWAS were conducted to unravel the genetic architecture of phenology, yield  
82 component traits and to identify several flowering time QTLs linked to adaptation of tropical  
83 maize to temperate climate [26, 27]. With the same array, Rincent *et al.* [11] showed that LD  
84 occurs over a longer distance in a dent than in a flint panel, with appreciable effects on the  
85 power of QTL detection. Comparison of LD extent between association panels suggests that  
86 genotyping with 50K markers causes a limited power of GWAS in many panels due to the  
87 low LD extent and the correlation between allelic values at some SNPs due to the kinship and  
88 population structure [14, 27]. Therefore, higher marker densities are desirable because the  
89 maize genome size is large (2.4 Gb), the level of diversity is high, and LD extent is low (more  
90 than one substitution per hundred nucleotides) [28]. As a consequence, an Affymetrix Axiom  
91 600,000 SNP-array (600K array) was developed and used in association genetics [29, 30] and  
92 detection of selective sweep [4]. Another possibility is whole genome sequencing, but this is  
93 currently unpractical for large genomes such as maize because of the associated cost. Hence, a  
94 Genotyping-By-Sequencing (GBS) procedure has been developed [2] that targets low-copy

95 genomic regions by using cheap restriction enzymes. Genotyping-by-sequencing has been  
96 successfully used in maize for genomic prediction [31]. Romay *et al.* [32] and Gouesnard *et*  
97 *al.* [33] highlighted the interest of the GBS for (i) deciphering and comparing the genetic  
98 diversity of the inbred lines in seedbanks and (ii) identifying QTLs by GWAS for kernel  
99 colour, sweet corn and flowering time. To our knowledge, the respective interests of DNA  
100 arrays and GBS for diversity analyses and GWAS have never been compared in plants.

101

102 The main drawback of the DNA arrays is that they do not allow to discover new SNPs. This  
103 possibly leads to some ascertainment bias in diversity analysis when the SNPs selected for  
104 building arrays come from (i) the sequencing of a set of individuals who did not well  
105 represent the diversity explored in the studied panel, (ii) a subset of SNPs that skews the  
106 allelic frequency profile towards the intermediate frequencies [27, 34]. Ascertainment bias  
107 can compromise the ability of the SNP arrays to reveal an exact view of the genetic diversity  
108 [34]. Genotyping-by-sequencing can overcome ascertainment bias since it is based on  
109 sequencing and therefore allows the discovery of alleles in the diversity panel analysed. It can  
110 be generalized to any species at a low cost providing that numerous individuals have been  
111 sequenced in order to build a representative library of short haplotypes to call SNPs [35].  
112 Non-repetitive regions of genomes can be targeted with two- to three-fold higher efficiency,  
113 thereby considerably reducing the computationally challenging problems associated with  
114 alignment in species with high repeat content. However, GBS may have a low-coverage  
115 leading to a high missing data rate (65% in both studies; [32, 33]) and heterozygote under-  
116 calling, depending on genome size and structure, and on the number of samples combined in  
117 the flow-cell. Furthermore, GBS requires the establishment of demanding bioinformatic  
118 pipelines and imputation algorithms [36]. Pipelines have been developed to call SNP

119 genotypes from raw GBS sequence data and to impute the missing data from a haplotype  
120 library [35, 36].

121 Here, we investigated the impact of using GBS and DNA arrays on the quality of the  
122 genotyping data, together with the biological properties of data generated by these  
123 technologies, and the potential complementarity of these approaches. In particular, we  
124 analyzed the impact of increasing the marker density and using different genotyping  
125 technologies (sequencing *vs* array) on (i) the estimates of relatedness and population structure,  
126 (ii) the detection of QTLs (power). To address these issues, we performed a GWAS based on  
127 genotypic datasets obtained using either GBS or DNA arrays with low (50k) or high (600k)  
128 densities on a diversity panel of maize hybrids obtained from a cross of dent lines with a  
129 common flint tester. Three traits were considered, namely grain yield, plant height and male  
130 flowering time (day to anthesis), measured in 22 different environments (sites  $\times$  years  $\times$   
131 treatments) over Europe. We developed an original approach based on LD extent in order to  
132 determine whether SNPs significantly associated with a trait should be considered as a single  
133 QTL or several independent QTLs.

134

## 135 **Results**

### **Combining Tassel and Beagle imputations improved the genotyping quality for GBS**

136 We estimated the genotyping and imputation concordance of the GBS based on common  
137 markers with the 50K or 600K arrays (Additional file 1: Figure S1 and Table S1). After SNP  
138 calling from reads using AllZeaGBSv2.7 database (direct reads, GBS<sub>1</sub>, Additional file 1:  
139 Figure S1), the call rate was 33.81% on the common SNPs with the 50K array, *vs* 37% for the

140 whole GBS dataset. The genotyping concordance rate was 98.88% (Additional file 1: Table  
141 S1). After imputation using *TASSEL* by Cornell Institute (GBS<sub>2</sub>), the concordance rate was  
142 96.04% on the common markers with the 50K array and 11.91% of missing data remained for  
143 the whole GBS dataset. In GBS<sub>3</sub>, all missing data were imputed by *Beagle* but yielded a lower  
144 concordance rate (92.14% and 91.58% for the 50K and the 600K arrays). In an attempt to  
145 increase the concordance rate of the genotyping while removing missing data, we tested two  
146 additional methods, namely GBS<sub>4</sub> where the missing data and heterozygotes of Cornell  
147 imputed data (GBS<sub>2</sub>) were replaced by *Beagle* imputation, and GBS<sub>5</sub> where Cornell  
148 homozygous genotypes (GBS<sub>2</sub>) were completed by imputations from GBS<sub>3</sub> (Additional file 1:  
149 Figure S1 and Table S1). GBS<sub>5</sub> displayed a slightly better concordance rate than GBS<sub>2</sub>  
150 (96.25% vs 96.04%) and predicted heterozygotes with a higher quality than GBS<sub>4</sub>. GBS<sub>5</sub> was  
151 therefore used for all genetic analyses and named GBS hereafter.

### **GBS displayed more rare alleles and lower call rate than microarrays**

152 The SNP call rate was higher for the arrays (average values of 96% and >99% for the 50K  
153 and 600K arrays, respectively), than for the GBS (37% for the direct reads). The MAF  
154 distribution differed between the technologies (Figure 1): while the use of arrays resulted in a  
155 near-uniform distribution, GBS resulted in an excess of rare alleles with a L-shaped  
156 distribution (22% of SNPs with MAF < 0.05 for the GBS *versus* 6% and 9% for the 50K and  
157 600K, respectively). This is not surprising since the 50K array was based on 27 sequenced  
158 lines for SNPs discovery [3], the 600K array was based on 30 lines for [4], whereas GBS was  
159 based on 31,978 lines, thereby leading to higher discovery of rare alleles. Consistent with  
160 MAF distribution, the average gene diversity (*He*) was lower for GBS (0.27) than for arrays  
161 (0.35 and 0.34 for the 50K and 600K arrays, respectively). The distribution of SNP

162 heterozygosity was similar for the three technologies, with a mean of 0.80%, 0.89% and 0.22  
163 % for the 50K and 600K arrays and GBS, respectively. The heterozygosity of inbred lines was  
164 highly correlated between technologies with large coefficients of Spearman correlation:  $r_{50K-}$   
165  $600K = 0.90$ ,  $r_{50K-GBS} = 0.76$ ,  $r_{600K-GBS} = 0.83$ . The distribution of the SNPs along the genome  
166 was denser in the telomeres for the GBS and in the peri-centromeric regions for the 600K  
167 array, whereas the 50K array exhibited a more uniform distribution (top graph in Figure 2 and  
168 in Additional file 2: Figure S2).

### **Population structure and relatedness were consistent between the three technologies**

169 We used the ADMIXTURE software to analyse the genetic structure within the studied panel  
170 based on SNPs from the three technologies, by using two to ten groups. Based on a K-fold  
171 cross-validation, the clustering in four genetic groups ( $N_Q = 4$ ) was identified as the best one  
172 in the datasets resulting from the three technologies. Considering a threshold of 0.5 (ancestral  
173 fraction), the assignation to the four groups was identical except for a few admixed inbred  
174 lines (Additional file 3: Figure S3). Based on the 50K, the four groups were constituted by (i)  
175 39 lines in the Non Stiff Stalk (Iodent) family traced by PH207, (ii) 46 lines in the Lancaster  
176 family traced by Mo17 and Oh43, and (iii) 55 lines in the stiff stalk families traced by B73  
177 and (iv) 107 lines that did not fit into the three primary heterotic groups, such as W117 and  
178 F7057. This organization appeared consistent with the organization of breeding programs into  
179 heterotic groups, generally related to few key founder lines.

180

181 We compared two estimators of relatedness between inbred lines, IBS (Identity-By-State) and  
182  $K\_Freq$  (Identity-By-Descend), calculated per technology. For IBS, pairs of individuals were



183 on average more related using the GBS data than those from arrays (Additional file 3: Table  
184 S2). Relatedness estimated with the two arrays were highly correlated:  $r = 0.95$  and  $0.98$  for  
185 IBS and  $K\_Freq$ , respectively (Figure 3 and Additional file 3: Figure S4b). The differences  
186 between the kinships estimated from the three technologies were reduced if the excess of rare  
187 alleles in the GBS was removed (Additional file 3: Figure S4c).

188

189 We further carried out diversity analyses by performing Principal Coordinate Analyses  
190 (PCoA) on IBD ( $K\_Freq$ , weights by allelic frequency) estimated from the three technologies.  
191 The two first PCoA axes explained 12.9%, 15.6% and 16.3% of the variability for the GBS,  
192 50K and 600K arrays, respectively. The same pattern was observed regardless of the  
193 technology with the first axis separating the Stiff Stalk from the Iodent lines and the second  
194 axis separating the Lancaster from the Stiff Stalk and Iodent lines (see illustration with the  
195 50K kinship, Additional File 3: Figure S5). Key founders lines of the three heterotic groups  
196 (Iodent: PH207, Stiff Stalk: B73, Lancaster: Mo17) were found at extreme positions along the  
197 axes, which was consistent with the admixture groups previously described.

### **Long distance linkage disequilibrium was removed by taking into account population structure or relatedness**

198 In order to evaluate the effect of kinship and the genetic structure on linkage disequilibrium  
199 (LD), we studied genome-wide LD between 29,257 PANZEA markers from the 50K array  
200 within and between chromosomes before and after taking into account the kinship ( $K\_Freq$   
201 estimated from the 50K array), structure (Number of groups = 4) or both (Additional file 4:  
202 Figure S6). Whereas inter-chromosomal LD was only partially removed when the genetic  
203 structure was taken into account, it was mostly removed when either the kinship or both

204 kinship and structure were considered (Additional file 4: Figure S6b and c). Accordingly, long  
205 distance intra-chromosomal LD was almost totally removed for all chromosomes by  
206 accounting for the kinship, structure or both. Interestingly, some pairs of loci located on  
207 different chromosomes or very distant on a same chromosome remained in high LD despite  
208 correction for genetic structure and kinship (Additional file 4: Figure S6). This can be  
209 explained either by genome assembly errors, by chromosomal rearrangements such as  
210 translocations or by strong epistatic interactions. Linkage disequilibrium decreased with  
211 genetic or physical distance, Additional file 4: Figure S7). The majority of pairs of loci with  
212 high LD ( $r^2K > 0.4$ ) in spite of long physical distance ( $> 30\text{Mbp}$ ), were close genetically  
213 ( $< 3\text{cM}$ ), notably on chromosome 3, 5, 7 and to a lesser extent 9 and 10. These loci were  
214 located in centromeric and peri-centromeric regions that displayed low recombination rate,  
215 suggesting that this pattern was due to variation of recombination rate along the chromosome.  
216 Only very few pairs of loci in high LD were genetically distant ( $> 5\text{cM}$ ) but physically close  
217 ( $< 2\text{Mbp}$ ). Linkage disequilibrium ( $r^2K$  and  $r^2KS$ ) was negligible beyond 1 cM since 99% of  
218 LD values were less than 0.12 in this case. Note that some unplaced SNPs remained in LD  
219 after taking into account the kinship and structure with some SNPs with known positions on  
220 chromosome 1, 3 and 4 (Additional File 4: Figure S6). Therefore, LD measurement  
221 corrected by the kinship can help to map unplaced SNPs.

### **Linkage disequilibrium strongly differed between and within chromosomes**

222 We combined the three technologies together to calculate the  $r^2K$  for all pairs of SNPs, which  
223 were genetically distant by less than 1 cM. For any chromosome region, LD extent in terms of  
224 genetic and physical distance showed a limited variation over the 100 sets of 500,000 loci  
225 pairs (cf. Material). This suggests that the estimation of LD extent did not strongly depend on

226 our set of loci. LD extent varied significantly between chromosomes for both high  
 227 recombinogenic (>0.5 cM/Mbp) and low recombinogenic regions (<0.5 cM/Mbp, Table 1).  
 228 Chromosome 1 had the highest LD extent in high recombination regions (0.062 ±0.007 cM)  
 229 and chromosome 9 the highest LD extent in low recombinogenic regions (898.6±21.7 kbp)  
 230 (Table 1). Linkage disequilibrium extent relative to genetic and physical distances was highly  
 231 and positively correlated in high recombinogenic regions ( $r = 0.86$ ), whereas it was not in low  
 232 recombinogenic regions ( $r = -0.64$ ).

233

234 **Table 1:** Variation of LD extent, and percentage of genome covered.

|                                                                       |          | Chromosome |         |         |         |         |         |         |         |         |         | Whole Genome |
|-----------------------------------------------------------------------|----------|------------|---------|---------|---------|---------|---------|---------|---------|---------|---------|--------------|
|                                                                       |          | 1          | 2       | 3       | 4       | 5       | 6       | 7       | 8       | 9       | 10      |              |
| Physical Size (kbp)                                                   |          | 301,354    | 237,069 | 232,140 | 241,474 | 217,873 | 169,174 | 176,765 | 175,794 | 156,751 | 150,189 | 2,058,583    |
| Genetic Size (cM)                                                     |          | 268        | 211     | 188     | 150     | 205     | 129     | 148     | 182     | 145     | 139     | 1766         |
| Physical LD extent (kbp) in Low Recombination regions (<0.5 cM / Mbp) |          | 306        | 491     | 846     | 808     | 658     | 418     | 547     | 497     | 899     | 815     | 629          |
| Genetic LD Extent (cM) in High Recombination regions (>0.5 cM / Mbp)  |          | 0.062      | 0.027   | 0.033   | 0.022   | 0.031   | 0.019   | 0.012   | 0.038   | 0.023   | 0.019   | 0.029        |
| Percent of physical genome covered                                    | 50K      | 81%        | 72%     | 76%     | 77%     | 74%     | 67%     | 71%     | 73%     | 71%     | 71%     | 74%          |
|                                                                       | 600K     | 98%        | 88%     | 91%     | 89%     | 90%     | 84%     | 81%     | 90%     | 87%     | 84%     | 89%          |
|                                                                       | GBS      | 92%        | 81%     | 84%     | 83%     | 83%     | 77%     | 77%     | 81%     | 79%     | 76%     | 82%          |
| Percent of genetic map covered                                        | Combined | 98%        | 90%     | 92%     | 90%     | 91%     | 87%     | 83%     | 92%     | 88%     | 85%     | 90%          |
|                                                                       | 50K      | 72%        | 41%     | 44%     | 38%     | 41%     | 32%     | 24%     | 46%     | 32%     | 27%     | 42%          |
|                                                                       | 600K     | 96%        | 71%     | 76%     | 68%     | 72%     | 62%     | 47%     | 78%     | 63%     | 53%     | 71%          |
| Percent of genetic map covered                                        | GBS      | 86%        | 58%     | 61%     | 53%     | 61%     | 48%     | 37%     | 63%     | 48%     | 40%     | 58%          |
|                                                                       | Combined | 97%        | 74%     | 78%     | 72%     | 74%     | 65%     | 51%     | 81%     | 66%     | 57%     | 74%          |

235 Genetic and Physical LD extent were obtained by adjusting Hill and Weir model's on  
 236 100 different sets of 500,000 loci randomly sampled in high and low recombination  
 237 regions, respectively. The value represented the average across these 100 sets. The  
 238 percentage of genome coverage was estimated using markers with MAF > 5% and  
 239  $E(r^2k) = 0.1$ , for each technology and for the three technologies combined  
 240 (GBS+600K+50K).

241

242 The effective population size ( $N_e$ ) estimated from the Hill and Weir's model [37] using  
 243 genetic distance varied from 7.9±0.04 (Chromosome 1) to 41.2±0.12 (Chromosome 7) in high  
 244 recombinogenic regions. Noteworthy, the same approach lead to unrealistic values in low

245 recombinogenic regions (from 961 on Chromosome 6 to more than 1 million for chromosome  
246 2 and 10), thereby confirming that the use of genetic distance is not well suited to model local  
247 LD in low recombinogenic regions.

248 Finally, we studied the variation of local LD extent along each chromosome by adjusting the  
249 Hill and Weir's model against genetic distance within a sliding windows of 1cM (Additional  
250 file 4: Figure S8). After removing intervals that did not reach our criteria (Absence of model  
251 convergence, effective population size  $> 247$ , low number of loci), the 3,205 remaining  
252 intervals (90%) showed a high variation for genetic LD extent along each chromosome, with  
253 LD extent varying from 0.019 ( $N_e = 246$ ) to 0.997 cM ( $N_e = 0.06$ ) (Additional file 4: Figure  
254 S8).

### **Large differences in genome coverage between technologies**

255 We estimated the percentage of the genome that was covered by LD windows around SNPs,  
256 calculated by using either physical or genetic distances (Table 1). We observed a strong  
257 difference in coverage between the three technologies at both genome-wide and chromosome  
258 scale, as illustrated in Figure 2 on chromosome 3 (Table 1, and Additional file 2: Figure S2).  
259 For a LD extent of  $r^2K = 0.1$ , 74%, 82% and 89% of the physical map, and 42%, 58% and  
260 71% of the genetic map were covered by the 50K array, the GBS and the 600K array,  
261 respectively (Table 1). For the combined data (50K + 600K + GBS), the coverage strongly  
262 varied between chromosomes, ranging from 83% (chromosome 7) to 98% (chromosome 1) of  
263 the physical map, and from 51% (chromosome 7) to 97% (chromosome 1) of the genetic map  
264 (Table 1). For the physical map, increasing the LD extent threshold to  $r^2K=0.4$  reduced the  
265 genome coverage from 89% to 49% for 600K, 82% to 28% for GBS, 74% to 20% for 50K  
266 and 90% to 52% for the combined data. Increasing the MAF threshold reduced slightly the

267 genome coverage, with smaller reduction for the physical map than genetic map. Surprisingly,  
268 increasing the SNP number by combining the markers from the arrays and GBS did not  
269 strongly increase the genome coverage as compared to the 600K, regardless of the threshold  
270 for LD extent (Figure 2 and Additional file 2: Figure S2).  
271 We observed a strong variation of genome coverage along each chromosome with contrasted  
272 patterns in low and high recombinogenic regions (Figure 2 and Additional file 2: Figure S2).  
273 While low recombinogenic regions were totally covered with all the technologies (except for  
274 few intervals using the 50K array), the genome coverage in high recombinogenic regions  
275 varied depending on both technology and SNP distribution. 47% of the 2Mbp intervals in  
276 high recombination regions were better covered by the 600K array than the GBS against only  
277 1%, which were better covered by GBS than 600K.  
278

### **Number of QTLs detected using genome-wide association studies increases with markers density**

279 We observed a strong variation in the number of SNP significantly associated with the three  
280 traits across the 22 environments (Table 2). The mean number of significant SNPs per  
281 environment and trait was 3.7, 44.7, 17.9 and 62.3 for the 50K, 600K, GBS and the three  
282 technologies combined, respectively (Table 3). Considering the p-value threshold used, 28,  
283 303 and 204 false positives were expected among the 243, 2,953 and 1,182 associations  
284 detected for 50K, 600K and GBS, respectively. False discovery rate appeared therefore higher  
285 for GBS (17.2%) than for DNA arrays (11.5% and 10.2% for 50K and 600K, respectively). It  
286 could be explained by the higher genotyping error rate of GBS due to imputation and/or by its  
287 higher number of makers with a lower MAF. Both reduce the power of GBS compared to

288 DNA arrays and therefore lead to a higher false discovery rate. Proportionally to the SNP  
 289 number, 50K and 600K arrays resulted in 1.5- and 1.7-fold more associated SNPs per  
 290 situation (environment  $\times$  trait) than GBS (p-value $<2 \times 10^{-6}$ , Table 3). This difference between  
 291 arrays and GBS was higher for grain yield (GY) and plant height (plantHT) than for male  
 292 flowering time (DTA, Table3).

293

294

295 **Table 2:** Number of significant SNPs per environment, per technology and for the  
 296 combined technologies.

| Environment | Flowering Time |     |      |      |          | Plant Height |     |      |      |          | Grain Yield  |     |       |      |          |
|-------------|----------------|-----|------|------|----------|--------------|-----|------|------|----------|--------------|-----|-------|------|----------|
|             | Heritability   | 50K | 600K | GBS  | Combined | Heritability | 50K | 600K | GBS  | Combined | Heritability | 50K | 600K  | GBS  | Combined |
| Gai12R      | 0.62           | 8   | 80   | 24   | 104      | 0.15         | 1   | 47   | 41   | 89       | 0.31         | 0   | 23    | 8    | 31       |
| Gai12W      | 0.66           | 5   | 42   | 15   | 59       | 0.40         | 0   | 1    | 3    | 4        | 0.56         | 3   | 71    | 14   | 85       |
| Gai13R      | 0.58           | 0   | 24   | 8    | 31       | 0.56         | 0   | 6    | 6    | 11       | 0.66         | 0   | 4     | 5    | 9        |
| Gai13W      | 0.78           | 1   | 45   | 9    | 54       | 0.40         | 0   | 1    | 3    | 4        | 0.81         | 2   | 7     | 1    | 9        |
| Ner12R      | 0.70           | 7   | 23   | 18   | 43       | 0.22         | 0   | 7    | 3    | 10       | 0.53         | 1   | 10    | 6    | 16       |
| Ner12W      | 0.80           | 1   | 80   | 30   | 108      | 0.28         | 0   | 2    | 2    | 4        | 0.60         | 1   | 8     | 6    | 15       |
| Ner13R      | 0.77           | 3   | 60   | 26   | 88       | 0.22         | 1   | 25   | 13   | 38       | 0.35         | 0   | 13    | 7    | 20       |
| Ner13W      | 0.81           | 2   | 23   | 17   | 42       | 0.27         | 0   | 8    | 5    | 13       | 0.76         | 2   | 28    | 4    | 32       |
| Cra12R      | 0.64           | 1   | 40   | 18   | 59       | 0.26         | 0   | 6    | 3    | 9        | 0.23         | 3   | 57    | 45   | 100      |
| Cra12W      | 0.69           | 3   | 25   | 19   | 44       | 0.18         | 10  | 69   | 16   | 83       | 0.54         | 12  | 98    | 53   | 149      |
| Kar12R      | 0.71           | 4   | 30   | 21   | 51       | 0.26         | 0   | 4    | 3    | 7        | 0.73         | 0   | 5     | 6    | 11       |
| Kar12W      | 0.77           | 8   | 60   | 10   | 73       | 0.22         | 1   | 10   | 4    | 14       | 0.54         | 2   | 19    | 11   | 29       |
| Kar13R      | 0.66           | 3   | 65   | 11   | 77       | 0.27         | 0   | 4    | 2    | 6        | 0.92         | 4   | 37    | 24   | 62       |
| Kar13W      | 0.81           | 0   | 17   | 12   | 29       | 0.26         | 0   | 2    | 7    | 9        | 0.67         | 4   | 12    | 6    | 19       |
| Mur13R      | 0.85           | 3   | 48   | 19   | 68       | 0.26         | 7   | 61   | 7    | 68       | 0.84         | 14  | 90    | 28   | 116      |
| Mur13W      | 0.8            | 0   | 11   | 8    | 19       | 0.33         | 3   | 4    | 2    | 9        | 0.74         | 10  | 80    | 25   | 103      |
| Deb12R      | 0.58           | 1   | 14   | 16   | 30       | 0.25         | 0   | 1    | 0    | 1        | 0.56         | 2   | 14    | 0    | 16       |
| Deb12W      | 0.73           | 0   | 25   | 38   | 61       | 0.41         | 0   | 6    | 7    | 12       | 0.47         | 0   | 6     | 2    | 8        |
| Deb13R      | 0.60           | 1   | 17   | 5    | 23       | 0.08         | 0   | 33   | 9    | 42       | 0.35         | 1   | 22    | 15   | 37       |
| Cam12R      | 0.36           | 0   | 3    | 1    | 4        | 0.52         | 23  | 209  | 88   | 289      | 0.35         | 21  | 286   | 102  | 379      |
| Cam12W      | 0.60           | 1   | 18   | 13   | 31       | 0.43         | 22  | 270  | 72   | 338      | 0.52         | 41  | 525   | 167  | 684      |
| Cam13R      | 0.45           | 0   | 9    | 7    | 16       | 0.15         | 0   | 2    | 3    | 5        | 0.18         | 0   | 1     | 3    | 4        |
| Average     |                | 2.4 | 34.5 | 15.7 | 50.6     |              | 3.1 | 35.4 | 13.6 | 48.4     |              | 5.6 | 64.4  | 24.5 | 87.9     |
| Median      |                | 1   | 25   | 15.5 | 47.5     |              | 0   | 6    | 4    | 5        |              | 2   | 19    | 7    | 156.6    |
| SD          |                | 2.6 | 22.7 | 8.7  | 27.8     |              | 6.8 | 69.6 | 23.2 | 90.0     |              | 9.6 | 120.1 | 39.5 | 156.6    |

297 The average, median and standard deviation (SD) per environment are calculated for  
 298 each trait (male Flowering Time, Plant Height, Grain Yield).

299

300 **Table 3:** Comparison of associated SNPs and QTLs detected between traits and  
 301 three technologies.

| Technology             | Significant SNPs |         |         |          | QTLs    |         |         |          |         |
|------------------------|------------------|---------|---------|----------|---------|---------|---------|----------|---------|
|                        | 50K              | 600K    | GBS     | Combined | 50K     | 600K    | GBS     | Combined |         |
| Marker Nb              | 42049            | 459191  | 308946  | 810580   | 42049   | 459191  | 308946  | 810580   |         |
| Total Nb               | DTA              | 52      | 759     | 345      | 1114    | 20      | 130     | 133      | 226     |
|                        | plantHT          | 68      | 778     | 299      | 1065    | 16      | 96      | 90       | 160     |
|                        | GY               | 123     | 1416    | 538      | 1934    | 33      | 166     | 120      | 238     |
|                        | Per trait        | 81      | 984     | 394      | 1371    | 23      | 131     | 114      | 208     |
| Average per envir.     | DTA              | 2.4     | 34.5    | 15.7     | 50.6    | 0.9     | 5.9     | 6.0      | 10.3    |
|                        | plantHT          | 3.1     | 35.4    | 13.6     | 48.4    | 0.7     | 4.4     | 4.1      | 7.3     |
|                        | GY               | 5.6     | 64.4    | 24.5     | 87.9    | 1.5     | 7.5     | 5.5      | 10.8    |
|                        | Per trait        | 3.7     | 44.7    | 17.9     | 62.3    | 1.0     | 5.9     | 5.2      | 9.5     |
| Average per SNP tested | DTA              | 5.70E-5 | 7.50E-5 | 5.10E-5  | 2.10E-5 | 2.20E-5 | 1.30E-5 | 2.00E-5  | 1.30E-5 |
|                        | plantHT          | 7.40E-5 | 7.70E-5 | 4.40E-5  | 2.00E-5 | 1.70E-5 | 9.50E-6 | 1.30E-5  | 9.00E-6 |
|                        | GY               | 1.30E-4 | 1.40E-4 | 7.90E-5  | 3.60E-5 | 3.60E-5 | 1.60E-5 | 1.80E-5  | 1.30E-5 |
|                        | Per trait        | 8.80E-5 | 9.70E-5 | 5.80E-5  | 7.70E-5 | 2.50E-5 | 1.30E-5 | 1.70E-5  | 3.50E-5 |

302 QTLs were obtained by grouping associated SNPs with overlapping LD windows  
303 (*LD\_win*) for the three traits (DTA: male flowering time; PlantHT: plant height; GY:  
304 grain yield). *Marker Nb*: is the number of markers tested in GWAS. *Total number*: is  
305 the sum of associated SNPs or QTLs across environments. *Average per envir.*: is the  
306 average number of QTLs obtained in 22 environments for three traits (66 trait-  
307 environments combinations). *Average per SNP tested*: is the number of associated  
308 SNPs or QTLs detected divided by the number of SNP tested.

309

310

311 We used two approaches based on LD for grouping significant SNPs: (i) considering that all  
312 SNPs with overlapping LD windows for  $r^2K=0.1$  belong to the same QTL (*LD\_win*) and (ii)  
313 grouping significant SNPs that are adjacent on the physical map and are in LD ( $r^2K > 0.5$ ,  
314 *LD\_adj*). The QTLs defined by using the two approaches were globally consistent since  
315 significant SNPs within QTLs were in high LD whereas SNPs from different adjacent QTLs  
316 were not (Additional file 6: Figure S9-LD-Adjacent and Additional file 7: Figure S9-LD-  
317 Windows). *LD\_adj* detected more QTLs than *LD\_win* for flowering time (242 vs 226), plant  
318 height (240 vs 160) and grain yield (433 vs 237). The number of QTLs detected with the  
319 *LD\_adj* approach increased strongly when the LD threshold was set above 0.5. Differences in  
320 QTL groupings between the two methods were observed for specific LD and recombination

321 patterns. This occurred for instance on chromosome 6 for grain yield (Additional file 6:  
322 Figure S9-LD-Adjacent and Additional file 7: Figure S9-LD-Windows). Within this region,  
323 the recombination rate was low and the LD pattern between associated SNPs was complex.  
324 While *LD\_adj* splitted several SNPs in high LD into different QTLs (for instance QTL 232,  
325 235, 237, 249), *LD\_win* grouped together associated SNPs that are genetically close but  
326 displayed a low LD (Additional file 6: Figure S9-LD-Adjacent and Additional file 7: Figure  
327 S9-LD-Windows). Reciprocally, for flowering time, we observed different cases where  
328 *LD\_win* separated distant SNPs in high LD into different QTLs whereas *LD\_adj* grouped  
329 them (QTL 25 and 26, 51 to 53, 95 to 97, 208 and 209, 218 and 219). As these differences  
330 were specific to complex LD and recombination patterns, we used the *LD\_win* approach for  
331 the rest of the analyses.

332

333 Although a large difference in number of associated SNPs was observed between 600K and  
334 GBS, little difference was observed between QTL number after grouping SNPs (Table 2,  
335 Table 3). The mean number of QTLs was indeed 1.0, 5.9 and 5.2 and 9.5 for the 50K, 600K,  
336 GBS, and the three technologies combined, respectively (Table 3). Note that the number of  
337 QTLs continued to increase with marker density when SNPs from GBS, 50K and 600K were  
338 combined (Figure 4). The number of SNPs associated with each QTL varied according to the  
339 technology (on average 3.7, 7.6, 3.4 and 6.6 significant SNPs for the 50K, 600K, GBS, and  
340 the combined technologies, respectively). The total number of QTLs detected over all  
341 environments by using the 600K array and GBS was close for flowering time (130 vs 133)  
342 and plant height (96 vs 90). It was 1.4-fold higher for the 600K than GBS for grain yield (166  
343 vs 120).

344



## The 600K and GBS were highly complementary for association mapping

345 The 600K and GBS technologies were highly complementary to detect QTLs for the three  
346 traits: 78%, 76% and 71% of the QTLs of flowering time, plant height and grain yield,  
347 respectively, were specifically detected by 600K or GBS (Figure 5). On the contrary, 50K  
348 displayed very few specific QTLs. While only 9 out 69 QTLs from the 50K array were not  
349 detected when the 600K array was used, 39 QTLs detected using the 50K array were not  
350 detected when using GBS. When we combined the GBS and 600K markers, 7% of their  
351 common QTLs had  $-\log_{10}(Pval)$  increased by 2 and 21% by 1 potentially indicating a gain in  
352 accuracy of the position of the causal polymorphism (Additional file 8: Table S3).

353 This complementarity between GBS and 600K is well exemplified with two strong  
354 association peaks for flowering time on chromosome 1 (QTL32) and 3 (QTL95) detected in  
355 several environments (Additional file 8: Table S3 and Figure 6a). In order to better understand  
356 the origin of the complementarity between GBS and 600K technologies for GWAS, we  
357 scrutinized the LD between SNPs and the haplotypes within these two QTLs (Figure 6b and c,  
358 and Additional file 9: Figure S10 for other examples). For example, QTL95 showed a gain in  
359 power. It was only identified by the 600K array although the region included numerous SNPs  
360 from GBS close to the associated peak. None of these SNPs was in high LD with the most  
361 associated marker of the QTL95 (Figure 6b). Another example is QTL32, which was detected  
362 by 1 to 10 GBS markers in 9 environments with  $-\log(p\text{-value})$  ranging from 5 to 7.6, whereas  
363 it was detected by only two 600K markers in one environment (Ner12W) with  $-\log(p\text{-value})$   
364 slightly above the significance threshold (Additional file 8: Table S3 and Figure 6b).

365

366 Haplotype analyses showed that the SNPs from the GBS within QTL95 were not able to  
367 discriminate all haplotypes (Figure 6c). In QTL95, using the 600K markers allowed one to

368 discriminate the three main haplotypes (H1, H2, H3), whereas using the GBS markers did not  
369 allow discrimination of H3 against H1 + H2. As H1 contributed to an earlier flowering time  
370 than H2 or H3, associations appeared more significant for the 600K than for GBS (Figure 6c).  
371 In QTL32, the use of GBS markers allowed identifying late individuals that mostly displayed  
372 H1, H2 and H3 haplotypes, against early individuals that mostly displayed H4 and H5  
373 haplotypes (Figure 6c). The gain of power for GBS markers as compared to 600K markers for  
374 QTL32 originated from the ability to discriminate late individuals (black alleles) from early  
375 individuals (red alleles) within H4 haplotypes (Figure 6c).

### **Stability, pleiotropy and distribution of QTL detected across environments**

376 After combining the three technologies, we identified 226, 160, 238 QTLs for the flowering  
377 time, plant height and grain yield, respectively (Table 3 and Additional file 8: Table S3). We  
378 highlighted 23 QTLs with the strongest effects on flowering time, plant height and grain yield  
379 ( $-\log_{10}(Pval) \geq 8$ , Table 4). The strongest association corresponded to the QTL95 for  
380 flowering time ( $-\log_{10}(p\text{-value}) = 10.03$ ) on chromosome 3 (158,943,646 – 159,005,990 bp),  
381 the QTL135 for GY ( $-\log_{10}(p\text{-value}) = 18.7$ ) on chromosome 6 (12,258,527 – 29,438,316 bp)  
382 and QTL78 on chromosome 6 (12,258,527 – 20,758,095 bp) for plant height ( $-\log_{10}(p\text{-value})$   
383  $= 17.31$ ). The QTL95 for flowering time trait was the most stable QTLs across environments  
384 since it was detected in 19 environments (Additional file 8: Table S3). Moreover, this QTL  
385 showed a colocalization with QTL74 for grain yield in 5 environments and QTL30 for plant  
386 height in 1 environment suggesting a pleiotropic effect. More globally, 472 QTLs appeared  
387 trait-specific whereas 70 QTLs overlapped between at least two traits (6,3%, 5.2% and 3.0%  
388 for GY and plantHT, GY and DTA, and DTA and plantHT, respectively) suggesting that  
389 some QTLs are pleiotropic (Additional file 10: Figure S11). This is not surprising since

390 average corresponding correlations within environments for these traits were moderate (0.47,  
 391 0.54 and 0.45, respectively). Only 0.7% overlapped between the three traits (Additional file  
 392 10: Figure S11). Twenty percent of QTLs were detected in at least two environments and 9%  
 393 in at least three environments (Additional file 10: Figure S12 and Table S4). We observed no  
 394 significant differences of stability between the three traits ( $p$ -value = 0.2). However, 6 out of 7  
 395 most stable QTLs (Number of environments >5) were found for flowering time and a higher  
 396 proportion of QTLs were specific for plant height than grain yield and flowering time (85% vs  
 397 77% for both flowering time and grain yield,  $p$ -value = 0.09,  $p$ -value = 0.2), respectively. We  
 398 observed that QTLs that displayed a significant effect in more than one environment had  
 399 larger effects and  $-\log(p$ -value) values than those significant in a single environment. This  
 400 difference in  $-\log(p$ -value) values was stronger for grain yield and plant height than flowering  
 401 time.

402

403 **Table 4:** Summary of the main QTLs ( $-\log_{10}(Pval) \geq 8$ ) identified for the three traits.

| Trait   | QTL | Chr | LowerLimit | UpperLimit | Pos       | R2   | Effect | Log   | MinorAll | MajorAll | MAF  | EnvMax | NbDiffEnv |
|---------|-----|-----|------------|------------|-----------|------|--------|-------|----------|----------|------|--------|-----------|
| DTA     | 95  | 3   | 158943646  | 159005990  | 158974594 | 0.15 | 1.27   | 10.03 | G        | C        | 0.41 | Ner13R | 19        |
| plantHT | 21  | 2   | 129971437  | 130912039  | 130441738 | 0.15 | -6.74  | 9.21  | A        | G        | 0.14 | Cam12W | 3         |
| plantHT | 71  | 6   | 6593785    | 6636807    | 6614012   | 0.13 | -4.76  | 8.39  | G        | A        | 0.18 | Cam12R | 2         |
| plantHT | 72  | 6   | 6793841    | 6837747    | 6807230   | 0.14 | -4.87  | 8.77  | T        | G        | 0.18 | Cam12R | 2         |
| plantHT | 78  | 6   | 12258527   | 20758095   | 20330595  | 0.27 | -8.99  | 17.31 | C        | T        | 0.26 | Cam12W | 4         |
| plantHT | 79  | 6   | 21037721   | 23951687   | 22905376  | 0.19 | -5.45  | 11.42 | T        | G        | 0.31 | Cam12R | 3         |
| plantHT | 80  | 6   | 24184017   | 26606537   | 25317825  | 0.13 | -4.41  | 8.17  | T        | C        | 0.2  | Cam12R | 2         |
| plantHT | 81  | 6   | 26695327   | 28659766   | 28130108  | 0.16 | -5.14  | 9.84  | C        | G        | 0.44 | Cam12R | 2         |
| plantHT | 94  | 6   | 101463249  | 101501936  | 101482646 | 0.14 | -5.98  | 8.22  | T        | A        | 0.17 | Cam12W | 2         |
| plantHT | 110 | 8   | 12767198   | 12798330   | 12782777  | 0.19 | -7.67  | 12.44 | C        | T        | 0.22 | Cam12W | 3         |
| GY      | 65  | 3   | 140505559  | 144210207  | 141621777 | 0.12 | 0.42   | 8.13  | A        | C        | 0.27 | Gai12W | 5         |
| GY      | 85  | 3   | 186994852  | 187057772  | 187028970 | 0.12 | -0.48  | 8.49  | A        | C        | 0.28 | Kar12W | 1         |
| GY      | 120 | 6   | 5131927    | 5177694    | 5155708   | 0.12 | -0.58  | 8.24  | C        | T        | 0.42 | Cam12W | 2         |
| GY      | 122 | 6   | 5623945    | 5659803    | 5638516   | 0.12 | -0.57  | 8.11  | T        | G        | 0.23 | Cam12W | 2         |
| GY      | 124 | 6   | 5855407    | 5887383    | 5871000   | 0.12 | -0.56  | 8.4   | T        | G        | 0.42 | Cam12W | 2         |
| GY      | 127 | 6   | 6593785    | 6636807    | 6612654   | 0.16 | -0.65  | 10.44 | C        | A        | 0.32 | Cam12W | 2         |
| GY      | 128 | 6   | 6793841    | 6837747    | 6807462   | 0.12 | -0.54  | 8.41  | A        | C        | 0.26 | Cam12W | 2         |
| GY      | 129 | 6   | 6878877    | 6930838    | 6890199   | 0.12 | 0.63   | 8.06  | T        | A        | 0.48 | Cam12W | 3         |
| GY      | 130 | 6   | 7027497    | 7088575    | 7046773   | 0.13 | 0.62   | 8.71  | A        | G        | 0.4  | Cam12W | 3         |
| GY      | 131 | 6   | 7113662    | 7200479    | 7159714   | 0.12 | 0.59   | 8.24  | T        | C        | 0.39 | Cam12W | 3         |
| GY      | 135 | 6   | 12258527   | 29438316   | 18528943  | 0.28 | -0.78  | 18.7  | G        | C        | 0.31 | Cam12W | 6         |
| GY      | 147 | 6   | 101463249  | 101501936  | 101482646 | 0.22 | -0.65  | 15.04 | T        | A        | 0.17 | Cam12W | 5         |
| GY      | 173 | 8   | 12767198   | 12798330   | 12782777  | 0.17 | -0.61  | 11.8  | C        | T        | 0.22 | Cam12W | 4         |

404 “LowerLimit” and “UpperLimit” are the lower and upper physical limits for each QTL,  
 405 followed by the physical position ( $Pos$ , bp), proportion of the variance explained ( $R^2$ ),

406 the effect of the major allele (*Effect*) as outputted by FastLMM,  $-\log_{10}(\mathbf{Pval})$  (*Log*), the  
407 minor and major alleles and the minor allele frequency (*MAF*) of the most significant  
408 SNP within the QTL. The environment for which the most associated QTL was  
409 observed (*EnvMax*) and the number of different environments (*NbDiffEnv*) that  
410 detected the QTL are shown. Note that QTLs 71-72 for the plant height and QTLs  
411 129-130 for the grain yield are genetically close ( $<1\text{cM}$ ) and display high mean LD  
412 ( $r^2K>0.5$ ). Hence, QTLs 71-72 and 129-130 can potentially be merged.

413

414 The distribution of QTLs was not homogeneous along the genome since 82%, 77% and 79%  
415 of flowering time, plant height and grain yield QTLs, respectively, were located in the high  
416 recombinogenic regions, whereas they represented 46% of the physical genome (Additional  
417 file 10: Table S5 and Figure S13). The QTLs were more stable ( $\geq 2$  environments) in low than  
418 in high recombinogenic regions (12.8% vs 5.8%,  $p\text{-value} = 0.03$ ).

## 419 **Discussion**

### **GBS required massive imputation but displayed similar global trends than DNA arrays for genetic diversity organization**

420 In order to reduce genotyping cost, GBS is most often performed at low depth leading to a  
421 high proportion of missing data, thereby requiring imputation in order to perform GWAS.  
422 Imputation can produce genotyping errors that can cause false associations and introduce bias  
423 in diversity analysis [33]. We evaluated the quality of genotyping and imputation obtained by  
424 different approaches, taking the 50K or 600K arrays as references. The best imputation  
425 method that yielded a fully genotyped matrix with a low error rate for the prediction of both  
426 heterozygotes and homozygotes was the approach merging the homozygous genotypes from  
427 Tassel and the imputation of Beagle for the other data (GBS<sub>5</sub> in Additional file 1: Table S1).

428 The quality of imputation was high with 96% of allelic values consistent with those of the  
429 50K and 600K arrays. This level of concordance is identical than in a study of USA national  
430 maize inbred seed bank by Romay *et al.* [32]. It is higher than in a diversity study of  
431 European flint maize collection (93%) by Gouesnard *et al.* [33], which was more distant from  
432 the reference AllZeaGBSv2.7 database than for the panel presented here.

433

434 The ascertainment bias of arrays due to the limited number of lines used for SNP discovery  
435 was reinforced by counter-selection of rare alleles during the design process of DNA arrays  
436 [3, 4]. For GBS, the polymorphism database to call polymorphisms included thousands of  
437 diverse lines [35]. In our study, we used AllZeaGBSv2.7 database. After a first step of GBS  
438 imputation (GBS<sub>2</sub>), missing data dropped to 11.9% *i.e.* only slightly more than in Romay *et*  
439 *al.* (10%) [34]. This confirms that the polymorphism database (AllZeaGBSv2.7) covered  
440 adequately the genetic diversity of our genetic material.

441

442 Although, we observed differences of allelic frequency spectrum between GBS and DNA  
443 arrays, these technologies revealed similar trends in the organization of population structure  
444 and relatedness (Figure 1, Additional file 3: Figure S3 and S4 and Table S2) suggesting no  
445 strong ascertainment bias for deciphering global genetic structure trends in the panel.  
446 However, although highly correlated, level of relatedness differed between GBS and DNA  
447 arrays, especially when the lines were less related as showed by the deviation (to the left) of  
448 the linear regression from the bisector (Figure 3).

### **The extent of linkage disequilibrium strongly varied along and between chromosomes**

449 Linkage disequilibrium extent in high recombinogenic regions varied to a large extent among

450 chromosomes, ranging from 0.012 to 0.062 cM. Similar variation of genetic LD extent  
451 between maize chromosomes has been previously observed by Rincent et al. [14], but their  
452 classification of chromosomes was different from ours. This difference could be explained by  
453 the fact that we analyzed specifically high and low recombination regions. According to Hill  
454 and Weir Model [37], the physical LD extent in a genomic region increased when the local  
455 recombination rate decreased. As a consequence, chromosome 1 and 9 had the lowest and  
456 highest physical LD extent and displayed the highest and one of the lowest recombination rate  
457 in pericentromeric regions, respectively (0.26 vs 0.11 cM / Mbp, Table 1 and Additional file  
458 10: Table S5). Unexpectedly, the genetic LD extent also correlated negatively with the  
459 recombination rate. It suggested that chromosomes with a low recombination rate also display  
460 a low effective population size. Background selection for deleterious alleles could explain this  
461 pattern since it reduced the genetic diversity in low recombinogenic regions [38, 39]. Finally,  
462 we observed a strong variation of the LD extent along each chromosome (Additional file 4:  
463 Figure S8). As we used a consensus genetic map [40] that represents well the recombination  
464 within our population, it suggested, according to Hill and Weir's model, that the number of  
465 ancestors contributing to genetic diversity varied strongly along the chromosomes. This likely  
466 reflects the selection of genomic regions for adaptation to environment or agronomic traits  
467 [38], that leads to a differential contribution of ancestors according to their allelic effects.  
468 Ancestors with strong favorable allele(s) in a genomic region may lead ultimately to large  
469 identical by descent genomic segments [41].

### **SNPs were clustered into QTL highlighting interesting genomic regions**

470 In previous GWAS, the closest associated SNPs were grouped into QTLs according to  
471 either a fixed physical distance [1] or a fixed genetic distance [30, 42]. These approaches

472 suffer of two drawbacks. First, the physical LD extent can vary strongly along chromosomes  
473 according to the variation of recombination rate (Additional file 2: Figure S2). Second, the  
474 genetic LD extent depends both on panel composition and the position along the genome  
475 (Table 1). These approaches may therefore strongly overestimate or underestimate the number  
476 of QTLs. To address both issues Cormier *et al.* [43] proposed to group associated SNPs by  
477 using a genetic window based on the genetic LD extent estimated by Hill and Weir model in  
478 the genomic regions around the associated peaks [37]. In our study, we improved this last  
479 approach (*LD\_win*):

480 - First, we used  $r^2K$  that corrected  $r^2$  for kinship rather than the classical  $r^2$  since  $r^2K$   
481 reflected the LD addressed in our GWAS mixed models to map QTL [17].

482 - Second, we took advantage of the availability of both physical and genetic maps of  
483 maize to project the genetic LD extent on the physical map. This physical window was useful  
484 to retrieve the annotation from B73 reference genome, decipher local haplotype diversity  
485 (Figure 6) and estimate physical genome coverage (Table 1, Figure 2).

486 - Third, we considered an average LD extent estimated separately in the high and low  
487 recombinogenic genomic regions. This average was estimated by using several large random  
488 sets of pairs of loci in these regions rather than the local LD extent in the genomic regions  
489 around each associated peaks.

490

491 We preferred this approach rather than using local LD extent in order to limit the effect of (i)  
492 the strong variation of marker density along the chromosome (Additional file 2: Figure S2),  
493 (ii) the local ascertainment bias due to the markers sampling (iii) the poor estimation of the  
494 local recombination rate using a genetic map, notably for low recombination regions [3, 41]  
495 (iv) errors in locus order due to assembly errors or chromosomal rearrangements.

496

497 We compared *LD\_win* with *LD\_adj*, another approach based on LD to group the SNPs  
498 associated to trait variation into QTL. The discrepancies between the two approaches can be  
499 explained by the local recombination rate and LD pattern. Since *LD\_adj* approach was based  
500 on the grouping of contiguous SNPs according to their LD, this approach was highly sensitive  
501 to (i) error in marker order or position due to genome assembly errors or structural variations,  
502 which are important in maize [44] (ii) genotyping or imputation errors, which we estimated at  
503 *ca.* 1% and *ca.* 4%, respectively, for GBS (Additional file 1: Table S1), (iii) presence of  
504 allelic series with contrasted effects in different experiments which are currently observed in  
505 maize [40], (iv) LD threshold used. On the other hand, *LD\_win* lead either to inflate the  
506 number of QTLs in high recombinogenic regions in which SNPs were too distant genetically  
507 to be grouped, or deflated their number by grouping associated SNPs in low recombinogenic  
508 regions. Since *LD\_win* considered the average LD extent, this method could conduct either to  
509 separate or group abusively SNPs when local LD extent were different than the global LD  
510 extent.

511

512 Note that LD windows should not be considered as confidence intervals since the  
513 relationship between LD and recombination is complex due to demography, drift and  
514 selection in association panels, contrary to linkage based QTL mapping [17]. The magnitude  
515 of the effect of causal polymorphism in the estimation of these intervals which is well  
516 established for linkage mapping should be explored further [45]. Other approaches have been  
517 proposed to cluster SNPs according to LD [46, 47]. These approaches aim at segmenting the  
518 genome in different haplotype blocks separating by high recombination regions. These



519 methods are difficult to use for estimating putative windows inside which the causal  
520 polymorphisms are because such approaches are not centered on the associated SNP.

521 Several QTLs identified by *LD\_win* in our study correspond to regions previously  
522 identified: in particular six regions associated with female flowering time [27] and 30 regions  
523 associated with different traits in the Cornfed dent panel [11]. Conversely, we did not identify  
524 in our study any QTL associated to the florigen *ZCN8*, which showed significant effect in  
525 these two previous studies. This relates most likely to the fact that we narrowed the flowering  
526 time range in our study, in particular by eliminating early lines. This reduced the  
527 representation of the early allele in the *Zcn8*, leading to a MAF of 0.27 in our study vs. 0.35 in  
528 Rincent *et al.* [11], which can diminishes the power of the tests [14].

**Complementarity of 600K and GBS for QTL detection resulted mostly from the tagging  
of different haplotypes rather than the coverage of different genomic regions.**

529 Number of significant SNPs and QTLs increased with the increase in marker number (Table  
530 3, Figure 4). This could be explained partly by a better coverage of some genomic regions by  
531 SNPs, notably in high recombinogenic regions which showed a very short LD extent and were  
532 enriched in QTLs (Additional file 10: Figure S13). Numerous new QTLs identified by the  
533 600K array and GBS as compared with those identified by the 50K array were detected in  
534 high recombinogenic regions that were considerably less covered by the 50K array than the  
535 600K array or GBS (Additional file 2: Figure S2).

536

537 The high complementarity for QTL detection between GBS and 600K array was only  
538 explained to a limited extent by the difference of the SNP distribution and density along the  
539 genome, since these two technologies targeted similar regions as showed by coverage analysis

540 (Figure 2 and Additional file 2: Figure S2). However, at a finer scale, SNPs from the 600K  
541 array and GBS could tag close but different genomic regions around genes. SNPs from the  
542 600K array were mostly selected within coding regions of genes [4], whereas SNP from GBS  
543 targeted more largely low copy regions, which included coding but also regulatory regions of  
544 genes [32, 35]. To further analyse the complementarity of the technologies, we analysed local  
545 haplotypes. We showed that both technologies captured different haplotypes when similar  
546 genomic regions were targeted (Figure 6). Hence, we pinpointed that GBS and DNA arrays  
547 are highly complementary for QTL detection because they tagged different haplotypes rather  
548 than tagging different regions (Figure 6). Based on the L-shaped MAF distribution, which  
549 suggest no ascertainment bias, and the high number of sequenced lines used for the GBS, we  
550 expect a closer representation of the variation present in our panel by this technology  
551 compared to the 600K array, but this comes to the cost of an enrichment in rare alleles. Both  
552 factors tend to counterbalance each other in terms of GWAS power.

553

554 Our results suggest that we did not reach saturation with our *c.* 800,000 SNPs because (i)  
555 some haplotypes certainly remain not tagged (ii) the genome coverage was not complete, and  
556 (iii) the number of significant SNPs and QTLs continued to increase with marker density  
557 (Figure 4). Considering LD and marker density, the genotypic data presently available were  
558 most likely enough to well represent polymorphisms in the centromeric regions, whereas  
559 using more markers would be beneficial for telomeric regions. New approaches based on  
560 resequencing of representative lines and imputation are currently developed to achieve this  
561 goal.

562

## 563 **Methods**

### **Plant Material and Phenotypic Data**

564 The panel of 247 genotypes (Additional file 11: Table S6) includes 164 lines from a wider  
565 panel of the CornFed project, composed of dent lines from Europe and America [11] and 83  
566 additional lines derived from public breeding programs in Hungary, Italy and Spain and  
567 recent lines free of patent from the USA. Lines were selected within a restricted window of  
568 flowering time (10 days). Candidate lines with poor sample quality, i.e. high level of  
569 heterozygosity, or high relatedness with other lines were discarded. The lines selection was  
570 also guided by pedigree to avoid as far as possible over-representation of some parental  
571 materials. These inbred lines were crossed with a common flint tester (UH007) and the  
572 hybrids were evaluated for male flowering time (Day To Anthesis, DTA), plant height  
573 (plantHT), and grain yield (GY) at seven sites in Europe, during two years (2012 and 2013),  
574 and for two water treatments (watered and rainfed) [30]. The adjusted mean (Best Linear  
575 Unbiased Estimation, BLUEs, <https://doi.org/10.15454/IASSTN>) of the three traits were  
576 estimated per environment (site  $\times$  year  $\times$  treatment) using a mixed model with correction for  
577 blocks, repetitions and rows and columns in order to take into account spatial variation of  
578 micro-environment in each field trial [30]. Variance components and heritability of each traits  
579 in each environment were also estimated [30] (Additional file 12: Table S7). Adjusted means  
580 of hybrids were combined with genotyping data of the lines to perform GWAS.

### **Genotyping and Genotyping-By-Sequencing Data**

581 The inbred lines were genotyped using three technologies: a maize Illumina Infinium HD 50K

582 array [3], a maize Affymetrix Axiom 600K array [4], and Genotyping-By-Sequencing [2, 35].  
583 In the arrays, DNA fragments are hybridized with probes attached to the array that flanked  
584 SNPs that have been previously identified between inbred lines (Additional file 5:  
585 Supplementary Text 1 for the description of the data from the two arrays). Genotyping-by-  
586 sequencing technology is based on multiplex resequencing of tagged DNA from different  
587 individuals for which some genomic regions were targeted using restriction enzyme (Keygene  
588 N.V. owns patents and patent applications protecting its Sequence Based Genotyping  
589 technologies) [2]. Cornell Institute (NY, USA) processed raw sequence data using a multi-  
590 step Discovery and a one-top Production pipeline (*TASSEL-GBS*) in order to obtain genotypes  
591 (Additional file 5: Supplementary Text 2). An imputation step of missing genotypes was  
592 carried out by Cornell Institute [36], which utilized an algorithm that searches for the closest  
593 neighbour in small SNP windows across the haplotype library [35], allowing for a 5%  
594 mismatch. If the requirements were not met, the SNP was left ungenotyped for individuals.  
595  
596 We applied different filters (heterozygosity rate, missing data rate, minor allele frequency) for  
597 a quality control of the genetic data before performing the diversity and association genetic  
598 analyses. For GBS data, the filters were applied after imputation using the method  
599 “Compilation of Cornell homozygous genotypes and Beagle genotypes” (GBS<sub>5</sub> in Additional  
600 file 1: Figure S1; See section “Evaluating Genotyping and Imputation Quality”). We  
601 eliminated markers that had an average heterozygosity and missing data rate higher than 0.15  
602 and 0.20, respectively, and a Minor Allele Frequency (MAF) lower than 0.01 for the diversity  
603 analyses and 0.05 for the GWAS. Individuals which had heterozygosity and/or missing data  
604 rate higher than 0.06 and 0.10, respectively, were eliminated.  
605

## Evaluating Genotyping and Imputation Quality

606 Estimating the genotyping and imputation quality were performed using 245 lines since two  
607 inbred lines have different seedlots between technologies. The 50K and the 600K arrays were  
608 taken as reference to compare the concordance of genotyping (genotype matches) with the  
609 imputation of GBS based on their position. While SNP position and orientation from GBS  
610 were called on the reference maize genome B73 AGP\_v2 (release 5a) [48], flanking  
611 sequences of SNPs in the 50K array were primary aligned on the first maize genome reference  
612 assembly B73 AGP\_v1 (release 4a.53) [49]. Both position and orientation scaffold carrying  
613 SNPs from the 50K array can be different in the AGP\_v2, which could impair correct  
614 comparison of genotype between the 50K array and GBS. Hence, we aligned flanking  
615 sequences of SNPs from the 50K array on maize B73 AGP\_v2 using the Basic Local  
616 Alignment Search Tool (BLAST) to retrieve both positions and genotype in the same and  
617 correct strand orientation (forward) to compare genotyping. The number of common markers  
618 between the 50K/600K, 50K/GBS, GBS/600K and 50K/600K/GBS was 36,395, 7,018,  
619 25,572 and 5,947 SNPs, respectively. The comparison of the genotyping and imputation  
620 quality between the 50K/GBS, 50K/600K and 600K/GBS was done on 5,336 and 24,286  
621 PANZEA markers [50] in common, and 26,154 markers in common, respectively. The  
622 genotyping concordance of the 600K with the 50K array was extremely high (99.50%) but  
623 slightly lower for heterozygotes (92.88%). In order to achieve these comparisons, we  
624 considered the direct reads from GBS (**GBS<sub>1</sub>**) and four approaches for imputation (**GBS<sub>2</sub>** to  
625 **GBS<sub>5</sub>**, Additional file 1: Figure S1). **GBS<sub>2</sub>** approach consisted in one imputation step from the  
626 direct read by Cornell University, using *TASSEL* software, but missing data was still present.  
627 **GBS<sub>3</sub>** approach consisted in a genotype imputation of the whole missing data of the direct  
628 read by *Beagle v3* [13]. In **GBS<sub>4</sub>**, genotype imputation by *Beagle* was performed on Cornell

629 imputed data after replacing the heterozygous genotypes into missing data. **GBS<sub>5</sub>**, consisted in  
630 homozygous genotypes of GBS<sub>2</sub> completed by values imputed in GBS<sub>3</sub> (Additional file 1:  
631 Figure S1).

### Diversity Analyses

632 After excluding the unplaced SNPs and applying the filtering criteria for the diversity  
633 analyses (MAF  $\geq 0.01$ ), we obtained the final genotyping data of the 247 lines with 44,732  
634 SNPs from the 50K array, 506,662 SNPs from the 600K array, and 395,053 SNPs from the  
635 GBS (Figure 1). All markers of the 600K array and GBS<sub>5</sub> that passed the quality control were  
636 used to perform the diversity analyses (estimation of Q genetic groups and K kinships). For  
637 the 50K, we used only the PANZEA markers (29,257 SNPs) [50] in order to reduce the  
638 ascertainment bias noted by Ganai *et al.* [3] when estimating Nei's index of diversity [51] and  
639 relationship coefficients. Genotypic data generated by the three technologies were organized  
640 as  $G$  matrices with  $N$  rows and  $L$  columns,  $N$  and  $L$  being the panel size and number of  
641 markers, respectively. Genotype of individual  $i$  at marker  $l$  ( $G_{i,l}$ ) was coded as 0 (the  
642 homozygote for an arbitrarily chosen allele), 0.5 (heterozygote), or 1 (the other homozygote).  
643 Identity-By-Descend (IBD) was estimated according to Astle and Balding [19]:

$$644 \quad K_{Freq_{i,j}} = \frac{1}{L} \sum_{l=1}^L \frac{(G_{i,l}-p_l)(G_{j,l}-p_l)}{p_l(1-p_l)},$$

645 where  $p_l$  is the frequency of the allele coded 1 of marker  $l$  in the panel of interest,  $i$   
646 and  $j$  indicate the inbred lines for which the kinship was estimated. We also estimated the  
647 Identity-By-State (IBS) by estimating the proportion of shared alleles. For GWAS, we used  
648  $K_{Chr}$  [14] that are computed using similar formula as  $K_{Freq}$ , but with the genotyping data  
649 of all the chromosomes except the chromosome of the SNP tested. This formula provides an  
650 unbiased estimate of the kinship coefficient and weights by allelic frequency assuming Hardy-

651 Weinberg equilibrium. Hence, relatedness is higher if two individuals share rare alleles than  
652 common alleles.

653

654 Genetic structure was analysed using the software *ADMIXTURE* v1.22 [18] with a  
655 number of groups varying from 2 to 10 for the three technologies. We compared assignment  
656 by *ADMIXTURE* of inbred lines between the three technologies by estimating the proportion  
657 of inbred lines consistently assigned between technologies two by two (50K vs GBS<sub>5</sub>, 50K vs  
658 600K, 600K vs GBS<sub>5</sub>) using a threshold of 0.5 for admixture.

659

660 Expected heterozygosity (He) [51] was estimated at each marker as  $2p_i(1 - p_i)$  and  
661 was averaged on all the markers for a global characterization of the panel for the three  
662 technologies. Principal Coordinate Analyses (PCoA) were performed on the genetic distance  
663 matrices [52], estimated as  $I_{N,N} - K\_Freq$ , where  $I_{N,N}$  is a matrix of ones of the same size as  
664  $K\_Freq$ .

### Linkage Disequilibrium Analyses

665 We first analyzed the effect of the genetic structure and kinship on linkage disequilibrium  
666 (LD) extent within and between chromosomes by estimating genome-wide linkage  
667 disequilibrium using the 29,257 PANZEA SNPs from the 50K array. Four estimates of LD  
668 were used: the squared correlation ( $r^2$ ) between allelic dose at two markers [53], the squared  
669 correlation taking into account global kinship with  $K\_Freq$  estimator ( $r^2K$ ), the squared  
670 correlation taking into account population structure ( $r^2S$ ), and the squared correlation taking  
671 into account both ( $r^2KS$ ) [17].

672

673 To explore the variation of LD decay and the stability of LD extent along the chromosomes,  
674 we estimated LD between a non-redundant set of 810,580 loci from the GBS, the 50K and  
675 600K arrays. To save computation time, we calculated LD between loci within a sliding  
676 window of 1 cM. Genetic position was obtained by projecting the physical position of each  
677 locus using a *smooth.spline* function R calibrated on the genetic consensus map of the  
678 Cornfed Dent Nested Association Mapping (NAM) design [40]. We used the estimator  $r^2$  and  
679  $r^2K$  using 10 different kinships  $K_{Chr}$ . This last estimator was calculated because it  
680 corresponds exactly to LD used to map QTL in our GWAS model. It determines the power of  
681 GWAS to detect QTL considering that causal polymorphisms were in LD with some  
682 polymorphisms genotyped in our panel [17]. To study LD extent variation, we estimated LD  
683 extent by adjusting Hill and Weir's model [37] using non-linear regression (*nls* function in R-  
684 package *nlme*) against both physical and genetic position within each chromosome. Since  
685 recombination rate (cM / Mbp) varied strongly along the genome (Figure 2 and Additional  
686 file 2: Figure S2), we defined high (>0.5 cM / Mbp) and low (<0.5 cM / Mbp)  
687 recombinogenic genomic regions within each chromosome. We adjusted Hill and Weir's  
688 model [37] separately in low and high recombinogenic regions (Additional file 10: Table S5)  
689 by randomly sampling 100 sets of 500,000 pairs of loci distant from less than 1 cM. This  
690 random sampling avoided over-representation of pairs of loci from low recombinogenic  
691 regions due to the sliding-window approach (Additional file 12: Figure S14). 500,000 pairs of  
692 loci represented 0.36% (Chromosome 3 / High rec) to 1.20% of all pairs of loci (Chromosome  
693 8 / High rec).

694 For all analyses, we estimated LD extent by calculating the genetic and physical distance for  
695 the fitted curve of Hill and Weir's Model that reached  $r^2K=0.1$ ,  $r^2K=0.2$  and  $r^2K=0.4$ .



## Genome coverage estimation

696 In order to estimate the genomic regions in which the effect of an underlying causal  
697 polymorphisms could be captured by GWAS using LD with SNP from three technologies, we  
698 developed an approach to define LD windows around each SNP with  $MAF \geq 5\%$  based on  
699 LD extent (Additional file 12: Figure S14). To set the LD window around each SNP, we used  
700 LD extent with  $r^2K=0.1$  (negligible LD),  $r^2K=0.2$  (intermediate LD) and  $r^2K=0.4$  (high LD)  
701 estimated in low and high recombinogenic regions for each chromosome. We used the global  
702 LD decay estimated for these large chromosomal regions rather than local LD extent (i) to  
703 avoid bias due to SNP sampling within small genomic regions, (ii) to reduce computational  
704 time, and (iii) to limit the impact of possible local error in genome assembly. In low  
705 recombinogenic regions, we used the physical LD extent, hypothesizing that recombination  
706 rate is constant along physical distance in these regions. In high recombinogenic regions, we  
707 used the genetic LD extent since there is a strong variation of recombination rate by base pair  
708 along the physical position (Additional file 2: Figure S2). We then converted genetic LD  
709 windows into physical windows by projecting the genetic positions on the physical map using  
710 the *smooth.spline* function implemented in R calibrated on the NAM dent consensus map  
711 [40]. Reciprocally, we obtained the genetic positions of LD windows in low recombinogenic  
712 regions by projecting the physical boundaries of LD windows on the genetic map.

713

714 To estimate coverage of the three technologies to detect QTLs based on their SNP distribution  
715 and density, we calculated cumulative genetic and physical length that are covered by LD  
716 windows around the markers, considering different LD extents for each chromosome  
717 ( $r^2K=0.1$ ,  $r^2K=0.2$ ,  $r^2K=0.4$ ). In order to explore variation of genome coverage along the  
718 chromosome, we estimated the proportion of genome covered using a sliding-windows

719 approach based on physical distance (2Mbp).

### Statistical Models for Association Mapping

720 We used four models to determine the statistical models that control best the confounding  
721 factors (*i.e.* population structure and relatedness) in GWAS (Additional file 5: Supplementary  
722 Texts 3 and 4). We tested different software implementing either approximate (EMMAX) [8]  
723 or exact computation of standard test statistics (ASReml and FaST-LMM) [6, 54] for  
724 computational time and GWAS results differences (Additional file 5: Supplementary Text 5).  
725 Single-trait, single-environment GWAS was performed for each marker for each environment  
726 and all traits using FaST-LMM. We selected the mixed model using  $K_{Chr}$ , estimated from  
727 PANZEA markers of the 50K array to perform GWAS on 66 situations (environment  $\times$  trait)  
728 (Additional file 5: Supplementary Text 4, Additional file 12: Figure S15 and Additional file  
729 12: Figure S16). We developed a GWAS pipeline in *R* v3.2.1 [55] calling FaST-LMM  
730 software and implementing [14] approaches to conduct single trait and single environment  
731 association tests.

732

733 Multiple testing is a major challenge in GWAS using large numbers of markers. The  
734 experiment-wise error rate ( $\alpha_e$ ) increases with the number of tests (number of markers) carried  
735 out, even when the point-wise error rate ( $\alpha_p$ ) is maintained low. Popular methods [56, 57] are  
736 overly conservative and can result in overlooking true positive associations. In addition, these  
737 corrections assume that the hypothesis tests are independent. To take into account the  
738 dependence of the tests in GWAS,  $\alpha_p$  has to be adjusted in order to keep  $\alpha_e$  at a nominal level.  
739 Moskvin and Schmidt [58] and Gao *et al.* [59, 60] corrections can correctly infer the number  
740 of independent tests and use the Bonferroni formula to rapidly adjust for multiple testing.

741 Using Gao approaches, we estimated the number of independent tests for GWAS at 15,780  
742 for the 50K, 92,752 for the 600K, 109,117 for the GBS<sub>5</sub> and 191,026 for the combined genetic  
743 data, leading to different  $-\log_{10}(p\text{-value})$  thresholds: 5.49, 6.27, 6.34 and 6.58, respectively.  
744 Because of these differences, we used two thresholds of  $-\log_{10}(p\text{-value}) = 5$  (less stringent)  
745 and 8 (highly conservative and slightly above Bonferroni) for comparing GWAS to avoid the  
746 differences of identification of significant SNPs between the technologies due to the choice of  
747 the threshold.  
748

### Methods for grouping associated SNPs into QTLs

749 We used two approaches based on LD for grouping significant SNPs. The first approach  
750 (*LD\_win*) used LD windows, previously described, to group significant SNPs into QTLs  
751 considering that all SNPs with overlapping LD windows of  $r^2K=0.1$  belong to the same QTL.  
752 We hypothesized that significant SNPs with overlapping LD windows at  $r^2K=0.1$  captured the  
753 same causal polymorphism and were therefore a single and unique QTL. The second  
754 approach (*LD\_adj*) grouped into single QTL significant SNPs that are adjacent on the  
755 physical map providing that their LD were above a LD threshold ( $r^2K > 0.5$ ). We used LD  
756 heatmaps for comparing the SNP grouping produced by the two approaches on the three  
757 different traits across all environments (Additional file 6: Figure S9-LD-Adjacent and  
758 Additional file 7: Figure S9-LD-Windows). All scripts are implemented in R software [55].

### 759 List of abbreviations

760 DTA = Day to Anthesis

761 GY = Grain Yield adjusted at 15% moisture

762 plantHT = Plant Height  
763 GBS = Genotyping By Sequencing  
764 LD = Linkage disequilibrium  
765 GWAS = Genome-Wide Association Studies  
766 MAF = Minimum Allelic Frequency  
767 SNP = Single Nucleotide Polymorphism  
768 HRR = High Recombinogenic Regions  
769 LRR = Low Recombinogenic Regions  
770 QTL = Quantitative Trait Locus  
771

## 772 **Declarations**

### **Ethics approval and consent to participate**

773 Not applicable.

### **Consent for publication**

774 Not applicable.

### **Availability of data and material**

775 The following link toward the data will be available upon publication of this paper.

776 All the genotyping data used in this study can be found at <https://doi.org/10.15454/AEC4BN>.

777 The GWAS results can be found at <https://doi.org/10.15454/6TL2N4>.

778 The phenotypic dataset can be found at <https://doi.org/10.15454/IASSTN>.

## Competing interests

779 The authors declare that they have no competing interests.

## Funding

780 This project (Project ID: 244374) was funded under the European FP7- KBBE (CP – IP –  
781 Large-scale integrating project, DROPS) and the *Agence Nationale de la Recherche* project  
782 ANR-10-BTBR-01 (ANR-PIA AMAIZING).

## Authors' contributions

783 S.S.N., S.D.N. and A.C., designed the studied and wrote the article. S.S.N. performed  
784 genotyping data quality control, imputation and genetic analyses. S.D.N. developed and  
785 performed LD analyses. A.C. designed the association panel with the help of S.D.N. and C.W.  
786 C.B. participated in assembling the dent inbred lines panel, organizing the germplasms and  
787 field work for seeds production. E.J.M., C.W. and F.T. collected and analysed the phenotypic  
788 data. V.C. and D.M. performed DNA extraction and prepared the samples. All authors  
789 critically reviewed and approved the final manuscript.

## Acknowledgements

790 We are grateful to key partners from the field: Pierre Dubreuil, Cécile Richard, Jérémy Lopez  
791 (Biogemma), Tamás Spitkó (MTA ATK), Therese Welz (KWS), Franco Tanzi, Ferenc Racz,  
792 Vincent Schlegel (Syngenta) and Maria Angela Canè (UNIBO). We also acknowledge Björn  
793 Usadel and Axel Nagel (MPI) for data management. We thank Willem Kruijer, Fred Van  
794 Eeuwijk (WUR), Tristan Mary-Huard and Laurence Moreau (INRA) for helpful discussions

795 and statistical advice. We are grateful to Chris-Carolin Schön (TUM) for providing an early  
796 access to the Affymetrix Axiom 600K array and Edward Buckler (USDA) for providing  
797 genotyping using GBS. We are also grateful to partners of the CornFed project, Univ.  
798 Hohenheim (Germany), CSIC (Spain), CRAG (Spain), MTA ATK (Hungary), NCRPIS  
799 (USA), CRB Maize (France) and CRA-MAC (Italy) who contributed to the genetic material.

### Authors' information (optional)

800 Not applicable.

### 801 **References**

802

803

- 804 1. Tian F, Bradbury PJ, Brown PJ, Hung H, Sun Q, Flint-Garcia S, Rocheford TR,  
805 McMullen MD, Holland JB, Buckler ES: **Genome-wide association study of leaf**  
806 **architecture in the maize nested association mapping population.** *Nature Genetics*  
807 2011, **43**:159.
- 808 2. Elshire RJ, Glaubitz JC, Sun Q, Poland JA, Kawamoto K, Buckler ES, Mitchell SE: **A**  
809 **Robust, Simple Genotyping-by-Sequencing (GBS) Approach for High Diversity**  
810 **Species.** *PLoS ONE* 2011, **6**: e19379.
- 811 3. Ganai MW, Durstewitz G, Polley A, Bérard A, Buckler ES, Charcosset A, Clarke JD,  
812 Graner E-M, Hansen M, Joets J, et al: **A Large Maize (*Zea mays* L.) SNP**  
813 **Genotyping Array: Development and Germplasm Genotyping, and Genetic**  
814 **Mapping to Compare with the B73 Reference Genome.** *PLoS ONE* 2011, **6**:  
815 e28334.

- 816 4. Unterseer S, Bauer E, Haberer G, Seidel M, Knaak C, Ouzunova M, Meitinger T,  
817 Strom TM, Fries R, Pausch H, et al: **A powerful tool for genome analysis in maize:  
818 development and evaluation of the high density 600 k SNP genotyping array.**  
819 *BMC Genomics* 2014, **15**:823.
- 820 5. Zhou X, Stephens M: **Genome-wide efficient mixed-model analysis for association  
821 studies.** *Nature Genetics* 2012, **44**:821.
- 822 6. Lippert C, Listgarten J, Liu Y, Kadie CM, Davidson RI, Heckerman D: **FaST linear  
823 mixed models for genome-wide association studies.** *Nature Methods* 2011, **8**:833.
- 824 7. Listgarten J, Lippert C, Kadie CM, Davidson RI, Eskin E, Heckerman D: **Improved  
825 linear mixed models for genome-wide association studies.** *Nature Methods* 2012,  
826 **9**:525.
- 827 8. Kang HM, Sul JH, Service SK, Zaitlen NA, Kong S-y, Freimer NB, Sabatti C, Eskin  
828 E: **Variance component model to account for sample structure in genome-wide  
829 association studies.** *Nature Genetics* 2010, **42**:348.
- 830 9. Flint-Garcia SA, Thornsberry JM, Buckler ES: **Structure of Linkage Disequilibrium  
831 in Plants.** *Annual Review of Plant Biology* 2003, **54**:357-374.
- 832 10. Remington DL, Thornsberry JM, Matsuoka Y, Wilson LM, Whitt SR, Doebley J,  
833 Kresovich S, Goodman MM, Buckler ES: **Structure of linkage disequilibrium and  
834 phenotypic associations in the maize genome.** *Proceedings of the National Academy  
835 of Sciences* 2001, **98**:11479.
- 836 11. Rincent R, Nicolas S, Bouchet S, Altmann T, Brunel D, Revilla P, Malvar RA,  
837 Moreno-Gonzalez J, Campo L, Melchinger AE, et al: **Dent and Flint maize diversity  
838 panels reveal important genetic potential for increasing biomass production.**  
839 *Theoretical and Applied Genetics* 2014, **127**:2313-2331.

- 840 12. Yu J, Pressoir G, Briggs WH, Vroh Bi I, Yamasaki M, Doebley JF, McMullen MD,  
841 Gaut BS, Nielsen DM, Holland JB, et al: **A unified mixed-model method for**  
842 **association mapping that accounts for multiple levels of relatedness.** *Nature*  
843 *Genetics* 2006, **38**:203.
- 844 13. Browning SR, Browning BL. **Rapid and Accurate Haplotype Phasing and Missing-**  
845 **Data Inference for Whole-Genome Association Studies By Use of Localized**  
846 **Haplotype Clustering.** *The American Journal of Human Genetics* 2007, **81** (5): 1084-  
847 1097
- 848 14. Rincent R, Moreau L, Monod H, Kuhn E, Melchinger AE, Malvar RA, Moreno-  
849 Gonzalez J, Nicolas S, Madur D, Combes V, et al: **Recovering Power in Association**  
850 **Mapping Panels with Variable Levels of Linkage Disequilibrium.** *Genetics* 2014,  
851 **197**:375.
- 852 15. Van Inghelandt D, Melchinger AE, Lebreton C, Stich B: **Population structure and**  
853 **genetic diversity in a commercial maize breeding program assessed with SSR and**  
854 **SNP markers.** *Theoretical and Applied Genetics* 2010, **120**:1289-1299.
- 855 16. Nicolas SD, Péros J-P, Lacombe T, Launay A, Le Paslier M-C, Bérard A, Mangin B,  
856 Valière S, Martins F, Le Cunff L, et al: **Genetic diversity, linkage disequilibrium**  
857 **and power of a large grapevine (*Vitis vinifera* L) diversity panel newly designed**  
858 **for association studies.** *BMC Plant Biology* 2016, **16**:74.
- 859 17. Mangin B, Siberchicot A, Nicolas S, Doligez A, This P, Cierco-Ayrolles C: **Novel**  
860 **measures of linkage disequilibrium that correct the bias due to population**  
861 **structure and relatedness.** *Heredity* 2012, **108**:285.
- 862 18. Alexander DH, Novembre J, Lange K: **Fast model-based estimation of ancestry in**  
863 **unrelated individuals.** *Genome Research* 2009, **19**:1655-1664.



- 864 19. Astle W, Balding DJ: **Population Structure and Cryptic Relatedness in Genetic**  
865 **Association Studies.** *Statist Sci* 2009, **24**:451-471.
- 866 20. Pritchard JK, Stephens M, Rosenberg NA, Donnelly P: **Association Mapping in**  
867 **Structured Populations.** *The American Journal of Human Genetics* 2000, **67**:170-  
868 181.
- 869 21. VanRaden PM: **Efficient Methods to Compute Genomic Predictions.** *Journal of*  
870 *Dairy Science* 2008, **91**:4414-4423.
- 871 22. Bernardo R: **Genomewide Markers for Controlling Background Variation in**  
872 **Association Mapping.** *The Plant Genome* 2013, **6**.
- 873 23. Thornsberry JM, Goodman MM, Doebley J, Kresovich S, Nielsen D, Buckler ES:  
874 **Dwarf8 polymorphisms associate with variation in flowering time.** *Nature*  
875 *Genetics* 2001, **28**:286.
- 876 24. Hufford MB, Lubinsky P, Pyhäjärvi T, Devengenzo MT, Ellstrand NC, Ross-Ibarra J:  
877 **The Genomic Signature of Crop-Wild Introgression in Maize.** *PLOS Genetics*  
878 2013, **9**:e1003477.
- 879 25. Rincent R, Laloë D, Nicolas S, Altmann T, Brunel D, Revilla P, Rodríguez VM,  
880 Moreno-Gonzalez J, Melchinger A, Bauer E, et al: **Maximizing the Reliability of**  
881 **Genomic Selection by Optimizing the Calibration Set of Reference Individuals:**  
882 **Comparison of Methods in Two Diverse Groups of Maize Inbreds (*Zea Mays L.*).**  
883 *Genetics* 2012, **192**:715.
- 884 26. Bouchet S, Bertin P, Presterl T, Jamin P, Coubriche D, Gouesnard B, Laborde J,  
885 Charcosset A: **Association mapping for phenology and plant architecture in maize**  
886 **shows higher power for developmental traits compared with growth influenced**  
887 **traits.** *Heredity* 2017, **118**:249-259.

- 888 27. Bouchet S, Servin B, Bertin P, Madur D, Combes V, Dumas F, Brunel D, Laborde J,  
889 Charcosset A, Nicolas S: **Adaptation of Maize to Temperate Climates: Mid-**  
890 **Density Genome-Wide Association Genetics and Diversity Patterns Reveal Key**  
891 **Genomic Regions, with a Major Contribution of the Vgt2 (ZCN8) Locus.** *PLoS*  
892 *ONE* 2013, **8**:e71377.
- 893 28. Messing J, Dooner HK: **Organization and variability of the maize genome.** *Current*  
894 *Opinion in Plant Biology* 2006, **9**:157-163.
- 895 29. Hu H, Schrag TA, Peis R, Unterseer S, Schipprack W, Chen S, Lai J, Yan J, Prasanna  
896 BM, Nair SK, et al: **The Genetic Basis of Haploid Induction in Maize Identified**  
897 **with a Novel Genome-Wide Association Method.** *Genetics* 2016, **202**:1267.
- 898 30. Millet EJ, Welcker C, Kruijer W, Negro S, Coupel-Ledru A, Nicolas SD, Laborde J,  
899 Bauland C, Praud S, Ranc N, et al: **Genome-Wide Analysis of Yield in Europe:**  
900 **Allelic Effects Vary with Drought and Heat Scenarios.** *Plant Physiology* 2016,  
901 **172**:749.
- 902 31. Crossa J, Beyene Y, Kassa S, Pérez P, Hickey JM, Chen C, de los Campos G,  
903 Burgueño J, Windhausen VS, Buckler E, et al: **Genomic Prediction in Maize**  
904 **Breeding Populations with Genotyping-by-Sequencing.** *G3:*  
905 *Genes/Genomes/Genetics* 2013, **3**:1903.
- 906 32. Romay MC, Millard MJ, Glaubitz JC, Peiffer JA, Swarts KL, Casstevens TM, Elshire  
907 RJ, Acharya CB, Mitchell SE, Flint-Garcia SA, et al: **Comprehensive genotyping of**  
908 **the USA national maize inbred seed bank.** *Genome Biology* 2013, **14**:R55.
- 909 33. Gouesnard B, Negro S, Laffray A, Glaubitz J, Melchinger A, Revilla P, Moreno-  
910 Gonzalez J, Madur D, Combes V, Tollon-Cordet C, et al: **Genotyping-by-sequencing**  
911 **highlights original diversity patterns within a European collection of 1191 maize**

- 912            **flint lines, as compared to the maize USDA genebank.** *Theoretical and Applied*  
913            *Genetics* 2017, **130**:2165-2189.
- 914 34.        Frascaroli E, Schrag TA, Melchinger AE: **Genetic diversity analysis of elite**  
915            **European maize (*Zea mays* L.) inbred lines using AFLP, SSR, and SNP markers**  
916            **reveals ascertainment bias for a subset of SNPs.** *Theoretical and Applied Genetics*  
917            2013, **126**:133-141.
- 918 35.        Glaubitz JC, Casstevens TM, Lu F, Harriman J, Elshire RJ, Sun Q, Buckler ES:  
919            **TASSEL-GBS: A High Capacity Genotyping by Sequencing Analysis Pipeline.**  
920            *PLoS ONE* 2014, **9**:e90346.
- 921 36.        Swarts K, Li H, Romero Navarro JA, An D, Romay MC, Hearne S, Acharya C,  
922            Glaubitz JC, Mitchell S, Elshire RJ, et al: **Novel Methods to Optimize Genotypic**  
923            **Imputation for Low-Coverage, Next-Generation Sequence Data in Crop Plants.**  
924            *The Plant Genome* 2014, **7**.
- 925 37.        Hill WG, Weir BS: **Variances and covariances of squared linkage disequilibria in**  
926            **finite populations.** *Theoretical Population Biology* 1988, **33**:54-78.
- 927 38.        Charlesworth D, Willis JH: **The genetics of inbreeding depression.** *Nature Reviews*  
928            *Genetics* 2009, **10**:783.
- 929 39.        Hudson RR, Kaplan NL: **Deleterious background selection with recombination.**  
930            *Genetics* 1995, **141**:1605.
- 931 40.        Giraud H, Bauland C, Falque M, Madur D, Combes V, Jamin P, Monteil C, Laborde J,  
932            Palaffre C, Gaillard A, et al: **Reciprocal Genetics: Identifying QTL for General**  
933            **and Specific Combining Abilities in Hybrids Between Multiparental Populations**  
934            **from Two Maize (*Zea mays* L.) Heterotic Groups.** *Genetics* 2017, **207**:1167.
- 935 41.        Bauer E, Falque M, Walter H, Bauland C, Camisan C, Campo L, Meyer N, Ranc N,

- 936 Rincent R, Schipprack W, et al: **Intraspecific variation of recombination rate in**  
937 **maize.** *Genome Biology* 2013, **14**:R103.
- 938  
939  
940  
941
- 942 41. Tian F, Bradbury PJ, Brown PJ, Hung H, Sun Q, Flint-Garcia S, Rocheford TR,  
943 McMullen MD, Holland JB, Buckler ES: **Genome-wide association study of leaf**  
944 **architecture in the maize nested association mapping population.** *Nature Genetics*  
945 2011, **43**:159.
- 946 42. Le Gouis J, Bordes J, Ravel C, Heumez E, Faure S, Praud S, Galic N, Remoué C,  
947 Balfourier F, Allard V, Rousset M: **Genome-wide association analysis to identify**  
948 **chromosomal regions determining components of earliness in wheat.** *Theoretical*  
949 *and Applied Genetics* 2012, **124**:597-611.
- 950 43. Cormier F, Le Gouis J, Dubreuil P, Lafarge S, Praud S: **A genome-wide**  
951 **identification of chromosomal regions determining nitrogen use efficiency**  
952 **components in wheat (*Triticum aestivum* L.).** *Theoretical and Applied Genetics*  
953 2014, **127**:2679-2693.
- 954 44. Springer NM, Ying K, Fu Y, Ji T, Yeh C-T, Jia Y, Wu W, Richmond T, Kitzman J,  
955 Rosenbaum H, et al: **Maize Inbreds Exhibit High Levels of Copy Number**  
956 **Variation (CNV) and Presence/Absence Variation (PAV) in Genome Content.**  
957 *PLOS Genetics* 2009, **5**:e1000734.
- 958 45. Darvasi A, Weinreb A, Minke V, Weller JI, Soller M: **Detecting marker-QTL**  
959 **linkage and estimating QTL gene effect and map location using a saturated**

- 960           **genetic map.** *Genetics* 1993, **134**:943.
- 961   46.   Gabriel SB, Schaffner SF, Nguyen H, Moore JM, Roy J, Blumenstiel B, Higgins J,  
962   DeFelice M, Lochner A, Faggart M, et al: **The Structure of Haplotype Blocks in the**  
963   **Human Genome.** *Science* 2002, **296**:2225.
- 964   47.   Wang H, Chu WS, Hemphill C, Elbein SC: **Human Resistin Gene: Molecular**  
965   **Scanning and Evaluation of Association with Insulin Sensitivity and Type 2**  
966   **Diabetes in Caucasians.** *The Journal of Clinical Endocrinology & Metabolism* 2002,  
967   **87**:2520-2524.
- 968   48.   Schnable PS, Ware D, Fulton RS, Stein JC, Wei F, Pasternak S, Liang C, Zhang J,  
969   Fulton L, Graves TA, et al: **The B73 Maize Genome: Complexity, Diversity, and**  
970   **Dynamics.** *Science* 2009, **326**:1112.
- 971   49.   Ganal MW, Altmann T, Röder MS: **SNP identification in crop plants.** *Current*  
972   *Opinion in Plant Biology* 2009, **12**:211-217.
- 973   50.   Gore MA, Chia J-M, Elshire RJ, Sun Q, Ersoz ES, Hurwitz BL, Peiffer JA, McMullen  
974   MD, Grills GS, Ross-Ibarra J, et al: **A First-Generation Haplotype Map of Maize.**  
975   *Science* 2009, **326**:1115.
- 976   51.   Nei M: **Estimation of Average Heterozygosity and Genetic Distance from a Small**  
977   **Number of Individuals.** *Genetics* 1978, **89**:583.
- 978   52.   Gower JC: **Some distance properties of latent root and vector methods used in**  
979   **multivariate analysis.** *Biometrika* 1966, **53**:325-338.
- 980   53.   Hill WG, Robertson A: **Linkage disequilibrium in finite populations.** *Theoretical*  
981   *and Applied Genetics* 1968, **38**:226-231.
- 982   54.   Butler DG, Cullis BR, Gilmour AR, Gogel BJ: **ASReml-R reference manual.** *The*  
983   *State of Queensland, Department of Primary Industries and Fisheries, Brisbane,*

984 *Australia* 2009.

985 55. R Core Team: **R: A language and environment for statistical computing.** *R*

986 *Foundation for Statistical Computing, Vienna, Austria* 2015:URL [https://www.R-](https://www.R-project.org/)

987 [project.org/](https://www.R-project.org/).

988 56. Bonferroni CE: **Teoria statistica delle classi e calcolo delle probabilità.**

989 *Pubblicazioni dell'Istituto Superiore di Scienze Economiche e Commerciali di Firenze*

990 1936, **8**:3-62.

991 57. Šidák Z: **Rectangular Confidence Regions for the Means of Multivariate Normal**

992 **Distributions.** *Journal of the American Statistical Association* 1967, **62**:626-633.

993 58. Moskvina V, Schmidt KM: **On multiple-testing correction in genome-wide**

994 **association studies.** *Genetic Epidemiology* 2008, **32**:567-573.

995 59. Gao X, Becker LC, Becker DM, Starmer JD, Province MA: **Avoiding the high**

996 **Bonferroni penalty in genome-wide association studies.** *Genetic Epidemiology*

997 2010, **34**:100-105.

998 60. Gao X, Starmer J, Martin ER: **A multiple testing correction method for genetic**

999 **association studies using correlated single nucleotide polymorphisms.** *Genetic*

1000 *Epidemiology* 2008, **32**:361-369.

1001

1002

## 1003 **Figure legends**

1004 **Figure 1:** Comparison of genotyping data between 50K and 600K arrays, and GBS. (a)

1005 Distribution of minor allele frequency per SNP before filtering (monomorphic SNPs

1006 removed). (b) Distribution of SNP missing data proportion for the 50K array, 600K array,

1007 GBS direct reads (GBS<sub>1</sub>) and GBS after imputation by Cornell Institute (GBS<sub>2</sub>, note that the  
1008 scale of the x-axes is different). (c) Relatedness distribution (Identity-By-State, IBS) after QC  
1009 filtering with  $MAF \geq 1\%$  (IBS using GBS<sub>1</sub> was not estimated because of the low calling rate).

1010

1011 **Figure 2:** Variation of the markers density (top), the recombination rate (middle) and the  
1012 genome coverage (bottom). Non-overlapping 2Mbp windows along the chromosome 3 were  
1013 used. The percentage of genome coverage used the cumulative length of LD windows  
1014 calculated around each SNP. Markers along chromosome 3 have  $MAF \geq 5\%$ . Green, blue, red  
1015 and black lines represent variation of GBS, 600K, 50K and combined technologies,  
1016 respectively.

1017

1018 **Figure 3:** Correlation ( $r$ ) of the Identity-By-State (IBS) between the three technologies (after  
1019 imputation). (a) IBS<sub>600K</sub> vs IBS<sub>50K</sub>, (b) IBS<sub>GBS</sub> vs IBS<sub>50K</sub>, (c) IBS<sub>GBS</sub> vs IBS<sub>600K</sub>. The red line  
1020 indicates the bisector.

1021

1022 **Figure 4:** Number of significant SNPs (blue line) and QTLs (red line) identified as a function  
1023 of SNP density (x-axis) for the three traits (DTA, male flowering time; plantHT, plant height;  
1024 GY, grain yield).

1025 **Figure 5:** Complementarity of the three technologies to detect QTLs. The numbers of specific  
1026 QTLs detected by each technologies for the three traits (flowering time, plant height, grain  
1027 yield) are shown.

1028 **Figure 6:** Complementarity of QTLs detection between the 600K array and the GBS for two  
1029 regions (QTL 32/QTL95). (a) Manhattan plot of the  $-\log_{10}(p\text{-value})$  along the genome. Dotted  
1030 red lines correspond to QTL32 and QTL95 located on chromosome 1 and 3, respectively, for

1031 the flowering time in one environment (Ner13R). **(b)** Local manhattan plot of the  $-\log_{10}(p$ -  
1032  $value)$  (top) and linkage disequilibrium corrected by the kinship ( $r^2K$ ) (bottom) of all SNPs  
1033 with the strongest associated marker within QTL 32 (left) and QTL 95 (right). **(c)** Local  
1034 haplotypes displayed by SNPs within the QTLs 32 (left) and 95 (right). Inbred lines are in  
1035 rows and SNPs are in columns. Inbred lines were ordered by hierarchical clustering based on  
1036 local dissimilarity estimated by all SNPs within each QTLs. Genotyping matrix is colored  
1037 according to their allelic dose at each SNP. Red and black represent homozygotes and gray  
1038 represent heterozygotes. The associated peaks (red vertical lines) and other associated SNPs  
1039 with  $-\log_{10}(p-value) > 5$  (orange vertical lines) are indicated above the genotyping matrix. H1,  
1040 H2, H3, H4, H5 represent the 5 and 3 haplotypes obtained by cutting the dendograms with the  
1041 most 5 and 3 dissimilar clusters within QTL32 and QTL95, respectively.

1042

## 1043 **Additional file legends**

### 1044 **Additional file 1 (.docx):**

1045 **Figure S1:** Different approaches used to compare the quality of genotyping and imputation of  
1046 the GBS. We considered the direct reads from GBS (**GBS<sub>1</sub>**) and four approaches for  
1047 imputation (**GBS<sub>2</sub>** to **GBS<sub>5</sub>**). **GBS<sub>2</sub>** approach consisted in one imputation step from the direct  
1048 read by Cornell University, using *TASSEL* software, but missing data was still present. **GBS<sub>3</sub>**  
1049 approach consisted in a genotype imputation of the whole missing data of the direct read by  
1050 *Beagle v3*. In **GBS<sub>4</sub>**, genotype imputation by *Beagle* was performed on Cornell imputed data  
1051 after replacing the heterozygous genotypes into missing data. **GBS<sub>5</sub>**, consisted in homozygous  
1052 genotypes of **GBS<sub>2</sub>** completed by values imputed in **GBS<sub>3</sub>**.

1053 **Table S1:** Percentage of GBS concordance based on the 50K and 600K arrays (Reference).



1054 Call rate of SNPs from GBS are in brackets. \* After Beagle inference of missing data, the call  
1055 rate is 100%. Here the call rate is <100% because the comparison was made against the 50K  
1056 and the 600K arrays that include few missing data.

1057

1058 **Additional file 2 (.pdf):**

1059 **Figure S2:** Variation of the markers density, the recombination rate and the genome coverage  
1060 in non-overlapping 2 Mbp windows along each chromosome. The percentage SNP coverage  
1061 (bottom) used the cumulated length of physical LD windows around each SNP. Markers have  
1062  $MAF \geq 5\%$ . Green, blue, red and black lines represent variation of GBS, 600K, 50K and  
1063 combined technologies, respectively.

1064

1065 **Additional file 3 (.docx):**

1066 **Figure S3:** Contribution of four ancestral populations to 247 inbred lines after ADMIXTURE  
1067 analysis. Markers from the 50K array (top), 600K array (middle) and GBS (bottom) were  
1068 used. One vertical bar corresponds to one individual. Lines were ordered according to  
1069 contributions observed for the 50K array. From left to right, we have Stiff Stalk lines type  
1070 B73 and B14a (red), Iodent lines type PH207 (green), Lancaster lines type Mo17 and Oh43  
1071 (turquoise), a group of lines assembling W117, F7057 type lines (blue).

1072 **Table S2:** Means and ranges of the two relatedness estimators (IBS and IBD *i.e.*  $K\_Freq$ )  
1073 from the 50K (29,257 PANZEA SNPs only) and 600K arrays, and GBS.

1074 **Figure S4:** Correlation ( $r$ ) between the IBS and IBD ( $K\_Freq$ ) for each technology (A) and  
1075 correlation of IBD between the three technologies (B). (C) Correlation of IBD between the  
1076 three technologies after removing the excess of rare alleles in the GBS to have the same  
1077 distribution of MAF as in the 50K and the 600K arrays. The red line is the bisector.

1078 **Figure S5:** Principal coordinate analyses (PCoA) of the DROPS panel. The PCoA were based  
1079 on the covariance matrix  $K_{Freq}$  estimated from the 50K Illumina array. The genetic groups  
1080 identified by ADMIXTURE ( $N_Q = 4$ ) are colored (differently than in Fig. S6). Three key  
1081 founders are indicated (Iodent: PH207 in red, Stiff Stalk: B73 in blueviolet, Lancaster: Mo17  
1082 in turquoise).

1083

1084 **Additional file 4 (.docx):**

1085 **Figure S6:** Heatmap of genome-wide linkage disequilibrium (LD) between all markers within  
1086 and between chromosomes using PANZEA SNPs from the 50K array. All SNPs were ordered  
1087 according to their position on the genome. Dots represented LD between two loci and were  
1088 colored according to their strength. Classical LD measurement  $r^2$  between loci were  
1089 represented within triangle below the diagonal. Linkage disequilibrium corrected for structure  
1090 ( $r^2S$ , A), relatedness ( $r^2K$ , B) or both ( $r^2KS$ , C) were represented within triangle above the  
1091 diagonal.

1092 **Figure S7:** Linkage disequilibrium ( $r^2$ , top) and LD corrected for relatedness ( $r^2k$ , bottom) as  
1093 a function of physical distance (left) and genetic distance (right): example of chromosome 1.

1094 **Figure S8:** Variation of genetic LD extent (Dm, cM), effective population size (N), along the  
1095 physical map. A sliding window of 1 cM moving by 0.5 cM at each step was used. Local  
1096 genetic LD extent (cM) and local effective size (N) were estimated by adjusting the Hill and  
1097 Weir model's using  $r^2K$  between all loci that are located in sliding windows of 1 cM. Each  
1098 values were plotted on the physical map of each chromosome by projecting the genetic  
1099 position of the windows on the physical map.

1100

1101 **Additional file 5 (.docx):**

1102 **Supplementary Text 1:** Differences between microarrays.

1103 **Supplementary Text 2:** GBS pipelines.

1104 **Supplementary Text 3:** Statistical models for GWAS.

1105 **Supplementary Text 4:** Effects of confounding factors on GWAS.

1106 **Supplementary Text 5:** Performance of different software.

1107

1108 **Additional file 6 (.pdf):**

1109 **Figure S9-LD\_Windows:** QTL limits obtained by the *LD\_win* approach projected on  
1110 heatmaps representing the level of LD between associated SNPs for each trait (DTA: male  
1111 flowering time, plantHT: plant height and GY: grain yield) and each chromosome. Upper and  
1112 lower triangles on the heatmaps represented the  $r^2$  and  $r^2_K$  values between associated SNPs,  
1113 respectively. Linkage disequilibrium between loci was colored according to values from weak  
1114 LD (yellow) to high LD (red). The significant markers were ordered according to their  
1115 physical positions on the chromosome and were represented by ticks on the four sides of the  
1116 heatmaps. Limits of QTLs were displayed by gray dotted lines. QTL numbers were indicated  
1117 in gray on the top and the right of each heatmap.

1118

1119 **Additional file 7 (.pdf):**

1120 **Figure S9-LD\_Adjacent:** QTL limits obtained by the *LD\_Adj* approach projected on  
1121 heatmaps representing the level of LD between associated SNPs for each trait (DTA: male  
1122 flowering time, plantHT: plant height and GY: grain yield) for each chromosome. Upper and  
1123 lower triangles on the heatmaps represented the  $r^2$  and  $r^2_K$  values between associated SNPs,  
1124 respectively. Linkage disequilibrium between loci was colored according to values from weak  
1125 LD (yellow) to high LD (red). The significant markers were ordered according to their

1126 physical positions on the chromosome and were represented by ticks on the four sides of the  
1127 heatmaps. Limits of QTLs were displayed by gray dotted lines. QTL numbers were indicated  
1128 in gray on the top and the right of each heatmap.

1129

1130 **Additional file 8 (.pdf):**

1131 **Table S3:** Summary of all the QTLs identified for the male flowering time (DTA), plant  
1132 height (plantHT) and grain yield (GY). “LowerLimit” and “UpperLimit” columns are the  
1133 lower and upper physical limits for each QTL. The “Rec” column indicates if the QTL is  
1134 located in a high or low region of recombination. “NbSNP50”, “LogPvaMax50”,  
1135 “NbSNP600”, “LogPvaMax600”, “NbSNPGBS”, “LogPvaMaxGBS” are the number of  
1136 significant SNPs and the most significant  $-\log_{10}(Pval)$  within the QTL for each technology  
1137 across all environments. The physical position (“PosMax”), the proportion of the variance  
1138 explained (“R2\_LDMax”) and the effect (“EffectMax”) of the most significant SNP within  
1139 the QTL is shown. “NbDiffEnv” gives the number of different situations that detected the  
1140 QTL.

1141

1142 **Additional file 9 (.docx):**

1143 **Figure S10:** Examples of comparison of QTLs detection on Chromosome 1, 6 and 8 for the  
1144 different traits. Local distribution of the  $-\log_{10}(p\text{-value})$  and linkage disequilibrium (bottom)  
1145 corrected by the kinship ( $r^2k$ ) of all SNPs with the strongest associated marker within the  
1146 chosen QTL for the three technologies. Ticks on different x-axes show the marker density of  
1147 the three technologies (red for the 50K, blue for the 600K and green for the GBS). The  
1148 vertical red line spots the position of the SNP with the maximum  $-\log_{10}(p\text{-value})$  within the  
1149 QTL.

1150

1151 **Additional file 10 (.docx):**

1152 **Figure S11:** Pleiotropy of QTLs between the traits. Number of QTLs specific and shared by  
1153 the three traits across all environments. Note that several QTLs from one trait were sometimes  
1154 included in a single QTL of another trait.

1155 **Figure S12:** Percentage of stable QTLs across environments for the three traits (DTA: male  
1156 flowering time, plantHT: Plant Height, GY: Grain Yield).

1157 **Table S4:** Stability of QTL across environments. DTA: male flowering time, plantHT: plant  
1158 height, GY: grain yield traits.

1159 **Table S5:** Recombination rate and proportion of low and high recombination regions.  
1160 Average recombination rate (“RecRate”) and proportion of the physical (“Phys”) and genetic  
1161 (“Genetic”) map in low (“LowRec”, <0.5 cM / Mbp) and high (“HighRec”, >0.5 cM / Mbp)  
1162 recombination regions for each chromosomes. “Chr” indicates the chromosome. Physical and  
1163 genetic size columns indicated the size of each chromosome in bp and cM, respectively.

1164 **Figure S13:** Percentage of QTLs located in high (darkgrey) and low (lightgrey)  
1165 recombinogenic regions. (a) male flowering time, (b) plant height and (c) grain yield.

1166

1167 **Additional file 11 (.pdf):**

1168 **Table S6:** Description of inbred lines. Variety and accession along with the breeders, seeds  
1169 providers and genetic groups obtained using ADMIXTURE for K=4 (Stiff Stalk, Iodent,  
1170 Lancaster, Other).

1171

1172 **Additional file 12 (.docx):**

1173 **Table S7:** Narrow sense heritability ( $h^2$ ) and variance components ( $V_g$ , genetic variance;  $V_e$ ,

1174 residual variance). The heritability and variance components were estimated for all traits  
1175 (grain yield, male flowering time and plant height) using the R package Heritability [1].

1176 **Figure S14:** Linkage disequilibrium based approach to delineate a physical window around  
1177 each SNP, exemplified with chromosome 3. Linkage disequilibrium (LD) windows were  
1178 defined per chromosome for each SNP based on physical LD extent in low recombinogenic  
1179 regions (left part) and based on genetic LD extent in high recombinogenic regions (right part).  
1180 These LD windows were used (i) to group significant SNPs into QTLs when they overlapped,  
1181 (ii) to estimate genome coverage to detect QTLs by GWAS considering region not covered by  
1182 LD windows, (iii) identify putative underlying genes involved in trait variations.

1183 **Figure S15:** QQ-plots representing observed  $-\log_{10}(p\text{-value})$  against expected  $-\log_{10}(p\text{-value})$   
1184 under null hypothesis (No association, black line). We tested association between 44,729  
1185 SNPs from the 50K array and the male flowering time trait in one environment (Gai12R)  
1186 using different GWAS models, kinship estimators and programs. (A) Comparisons between  
1187 statistical models: M1 is the model without correction (green dots), M2 takes into account the  
1188 group structure (blue dots), M3 takes into account kinship (IBD:  $K_{freq}$ ) between individuals  
1189 (purple dots) and M4 takes into account both group structure and kinship (red dots). (B)  
1190 Comparison between mixed models using different estimates (IBS and IBD,  $K_{freq}$ ) of  
1191 kinship. (C) Comparison of using or not Rincent *et al.* 2014 approach (using  $K_{Chr}$  vs  
1192  $K_{freq}$ ). (D) Comparison between different informatics tools (EMMAX, ASReml, FasST-  
1193 LMM) that perform GWAS.

1194 **Figure S16:** Correlations between the GWAS results from the GBS genetic data using a  
1195 kinship estimated from the PANZEA 50K array (x-axis) and a kinship estimated from the  
1196 GBS (y-axis). The horizontal and vertical lines are the threshold  $-\log_{10}(p\text{-value}) = 5$ . The  
1197 correlations were done using the flowering time (DTA) and plant height (plantHT) traits and

1198 the two sites, two years and two treatments (Gai12R, Gai12W, Gai13R, Gai13W, Ner12R,  
1199 Ner12W, Ner13R, Ner13W).

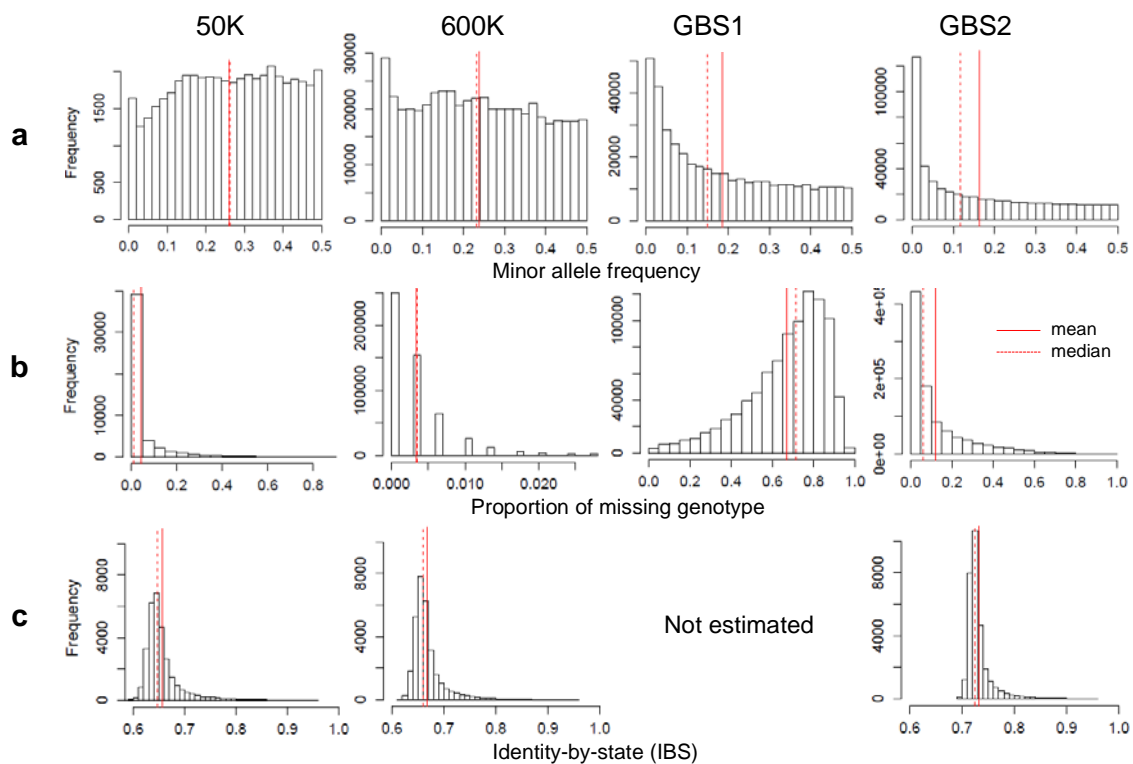



### Chromosome 3

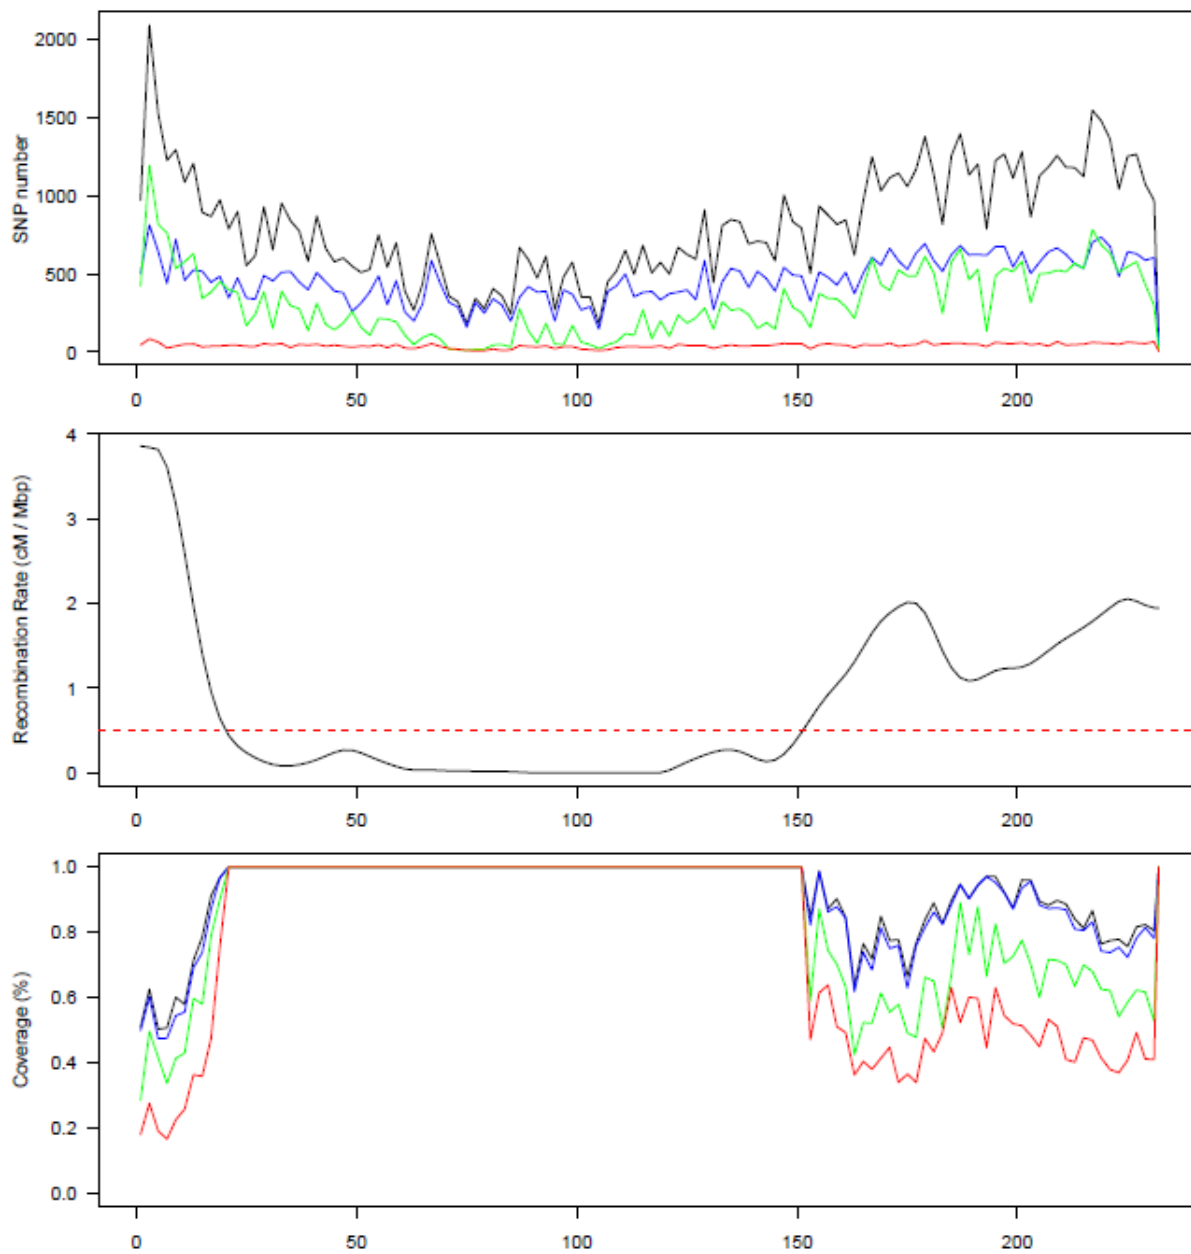

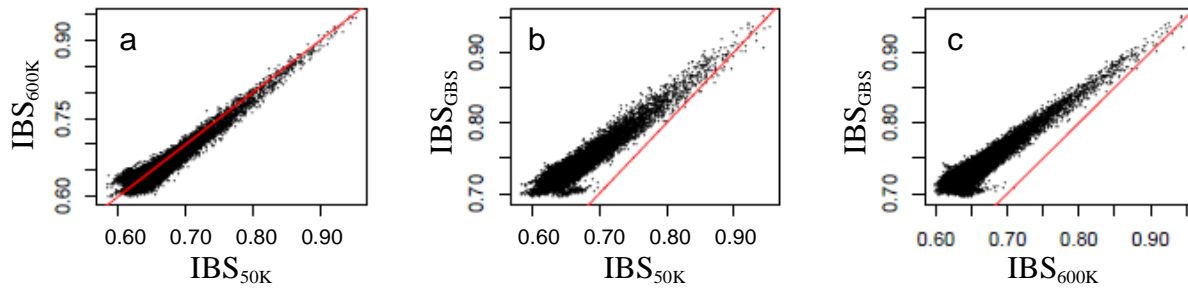

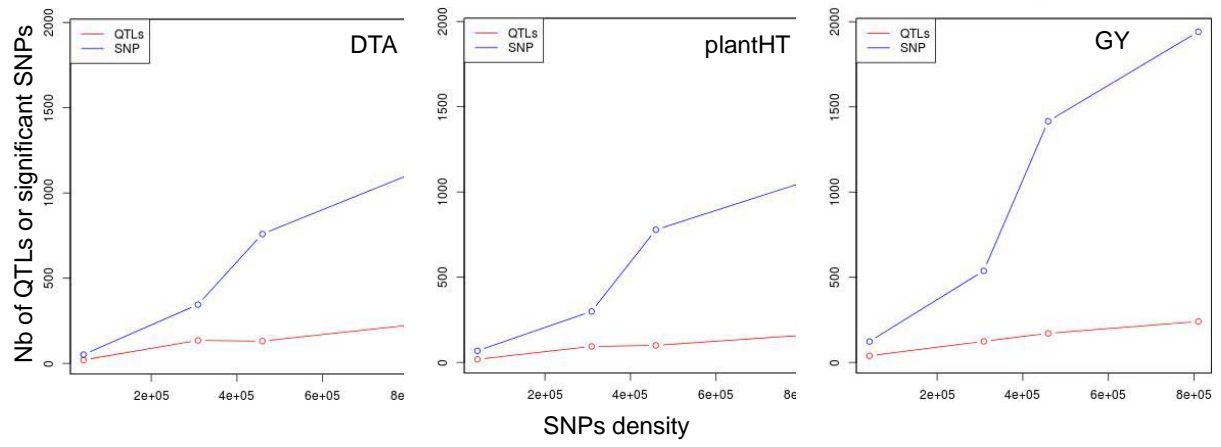

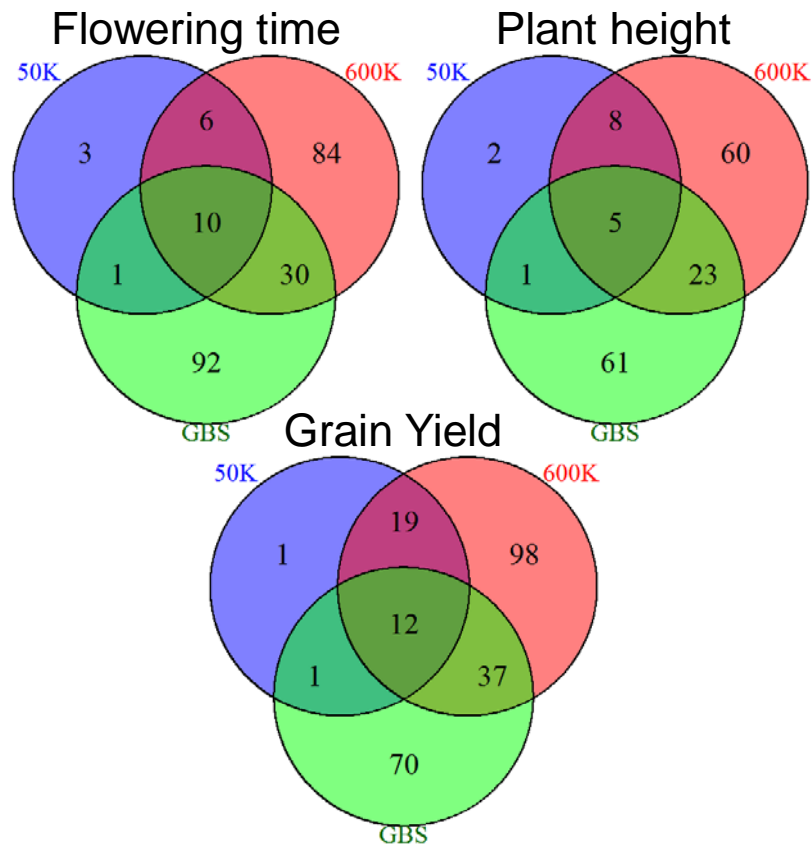

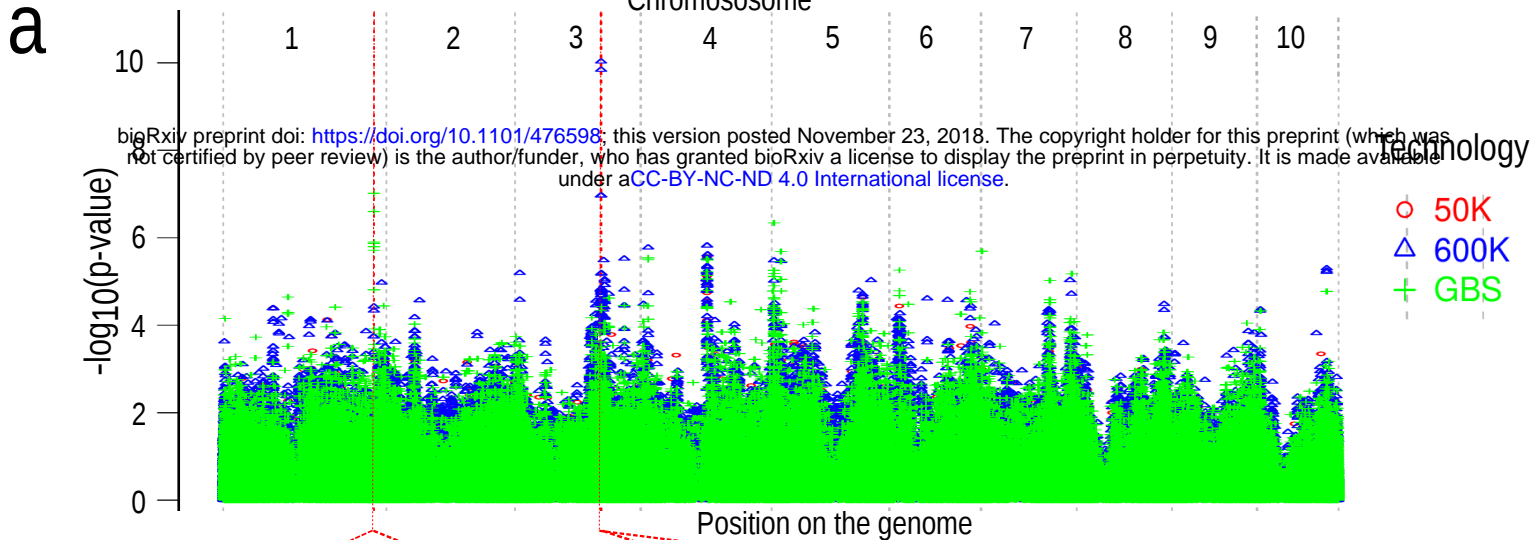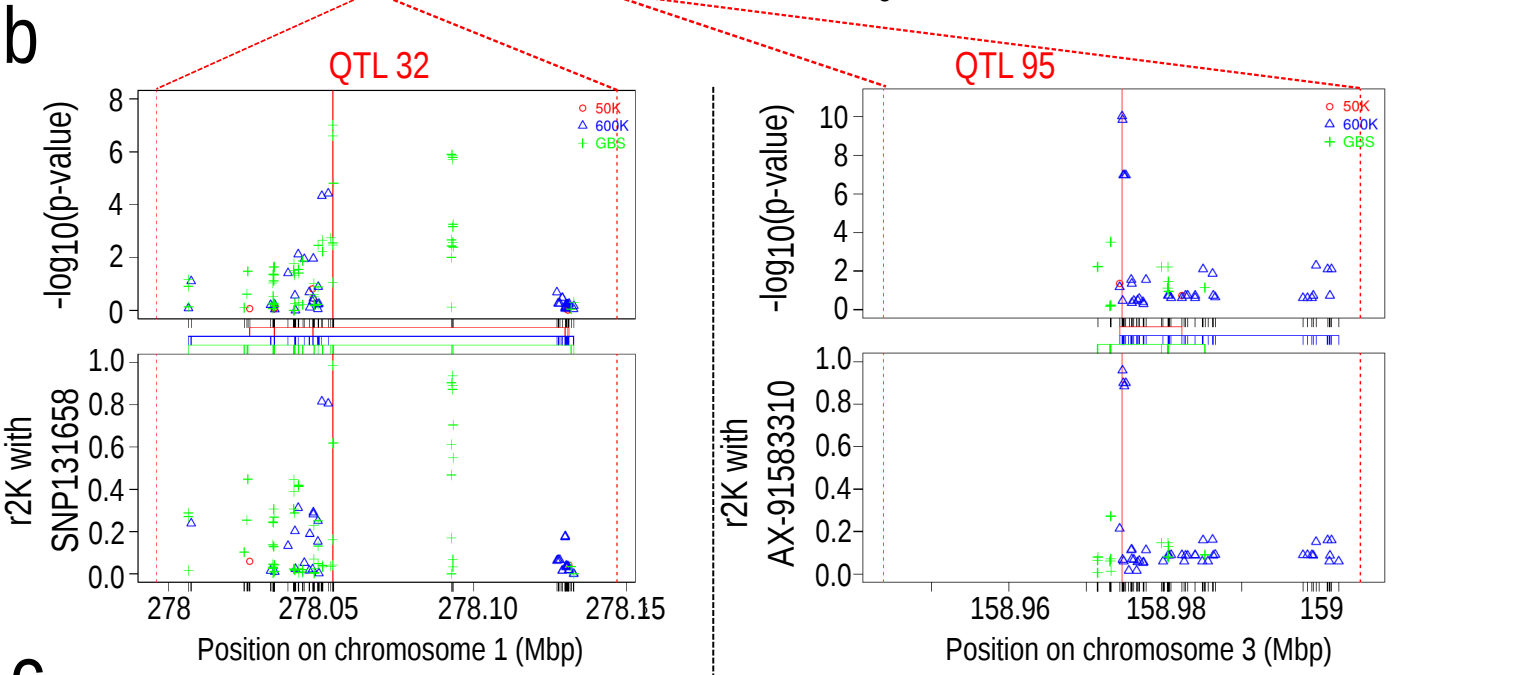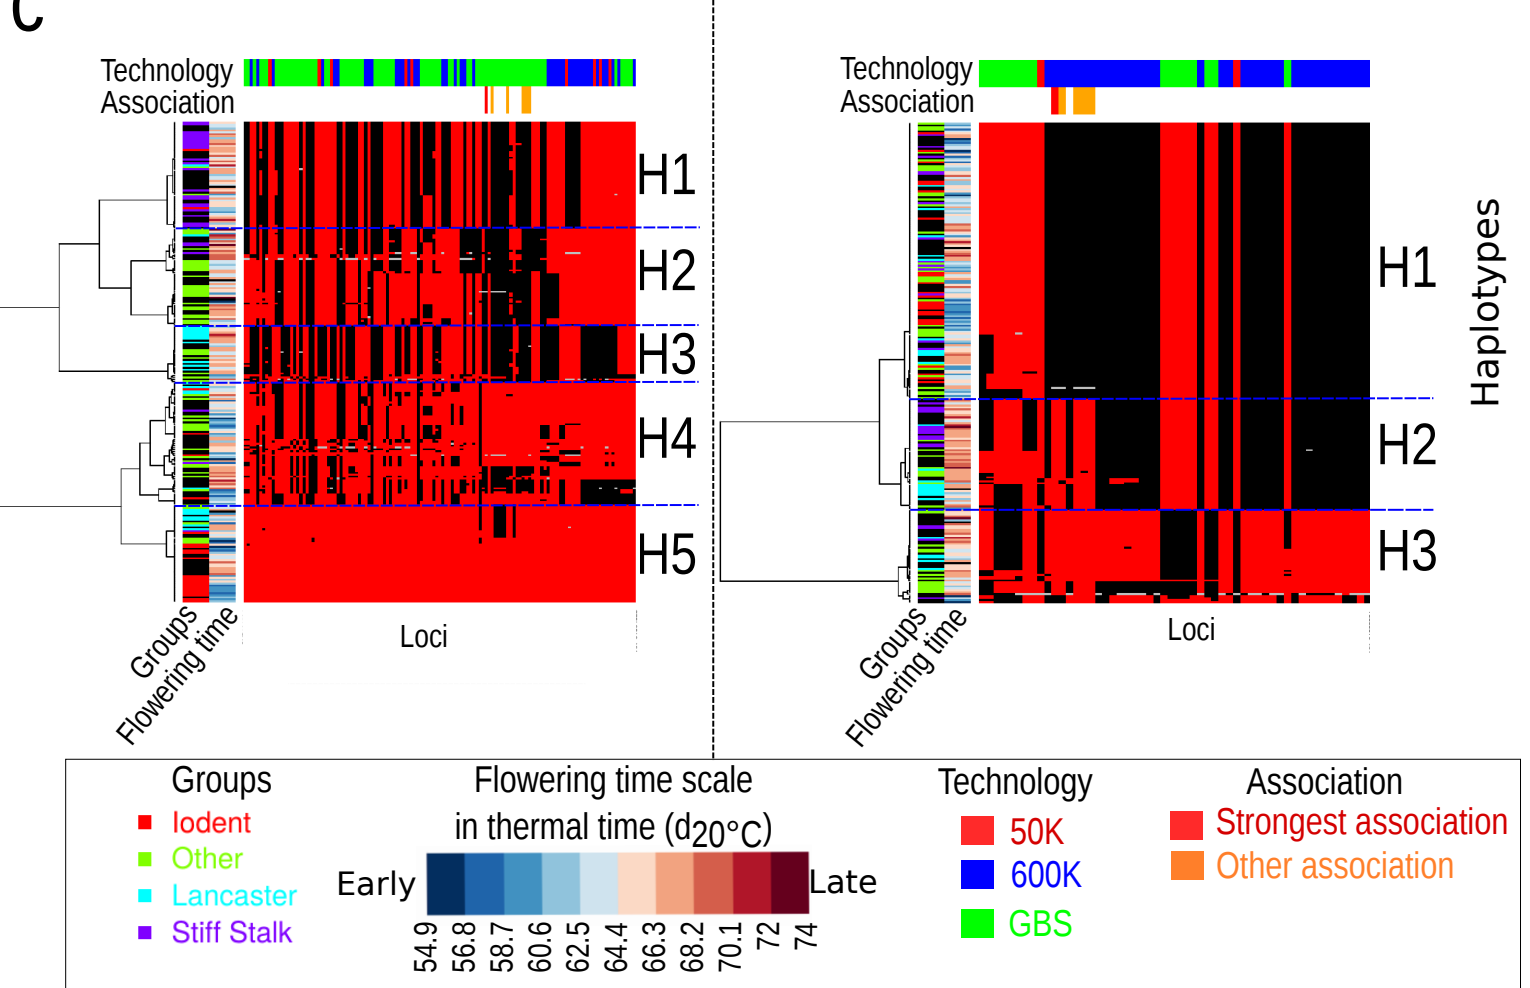

Source: https://www.biorxiv.org/content/10.1101/476598v1.full.pdf
