# Supplementary material for: Genotyping-by-sequencing and SNP-arrays are complementary for detecting quantitative trait loci by tagging different haplotypes in association studies
Source: bioRxiv or medRxiv preprint supplement (doi:10.1101/476598), 2019-05-24
Supplement: Supplementary file [file media-2.pdf]

# Chromosome 1

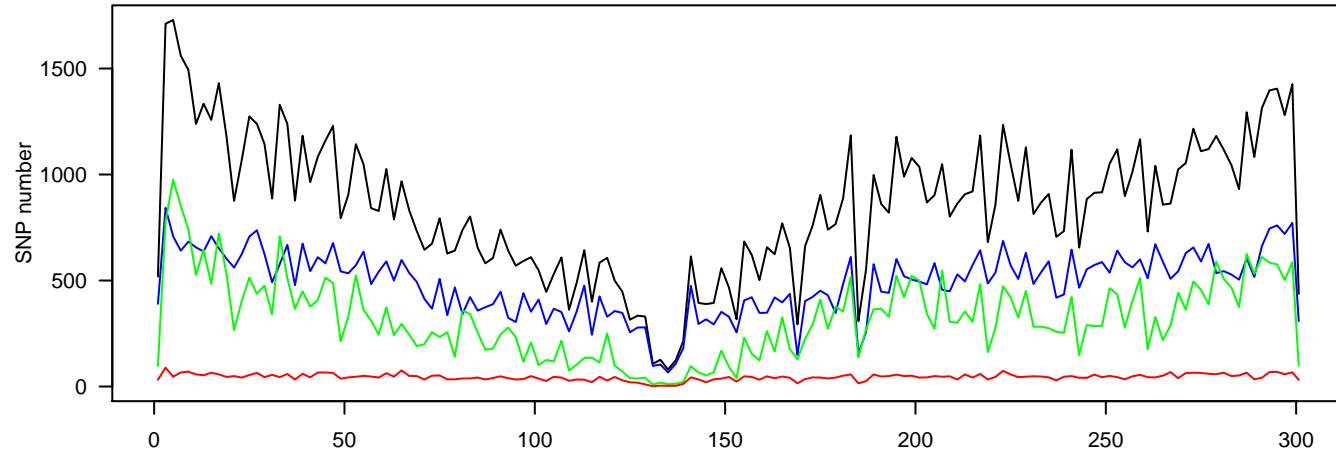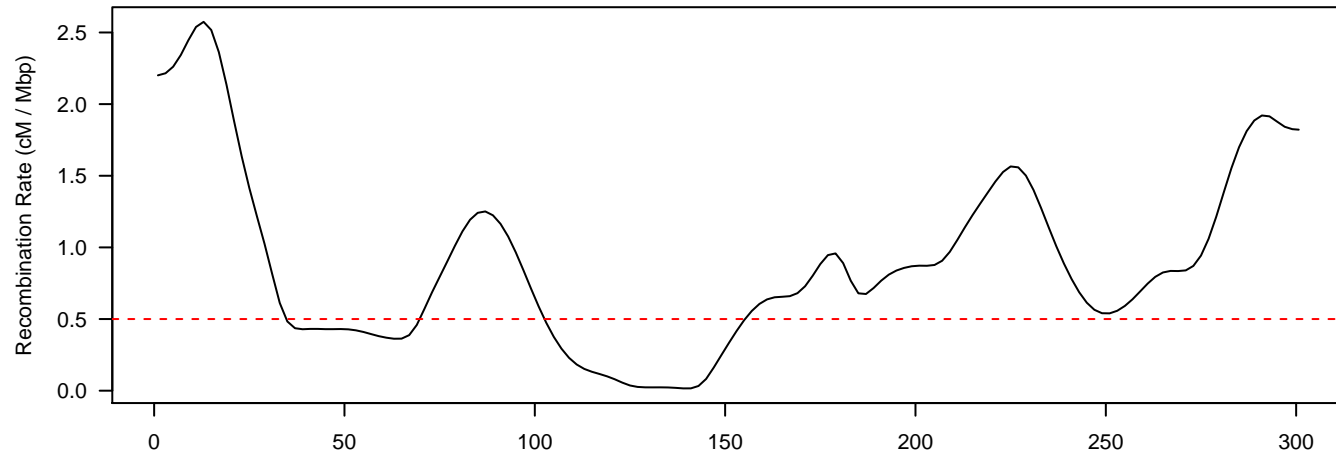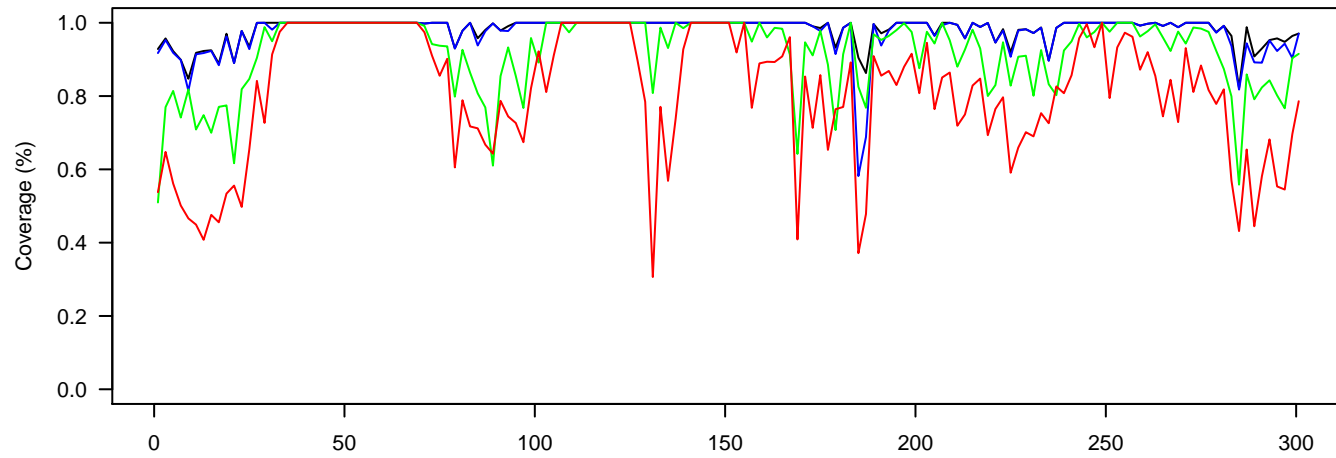

# Chromosome 2

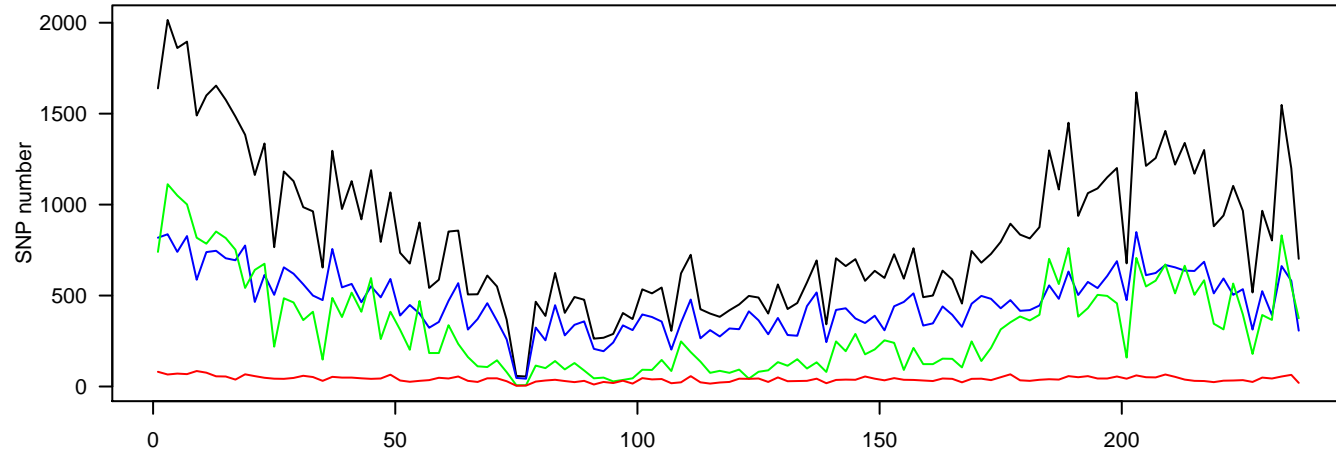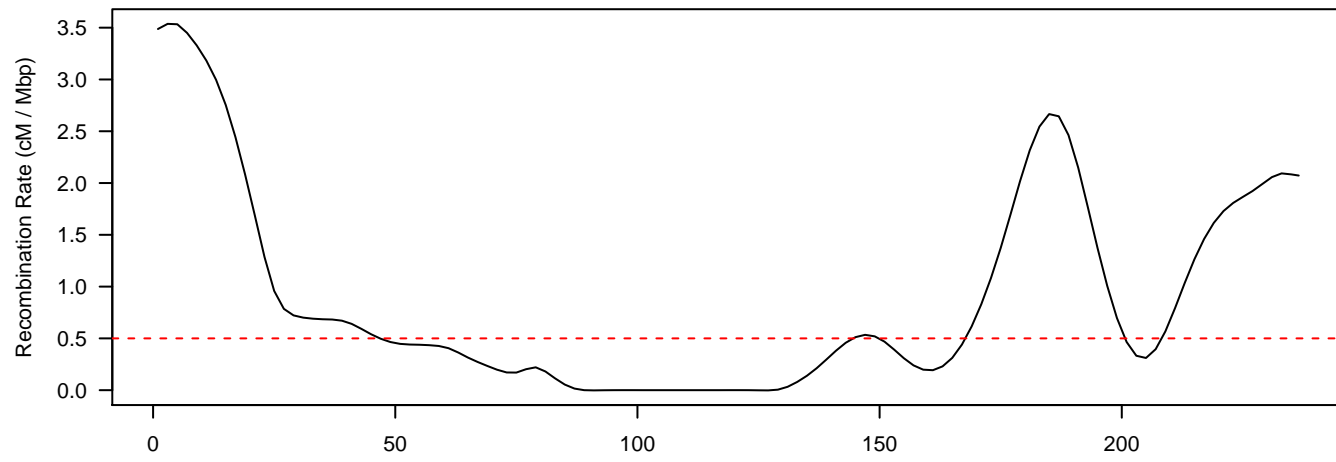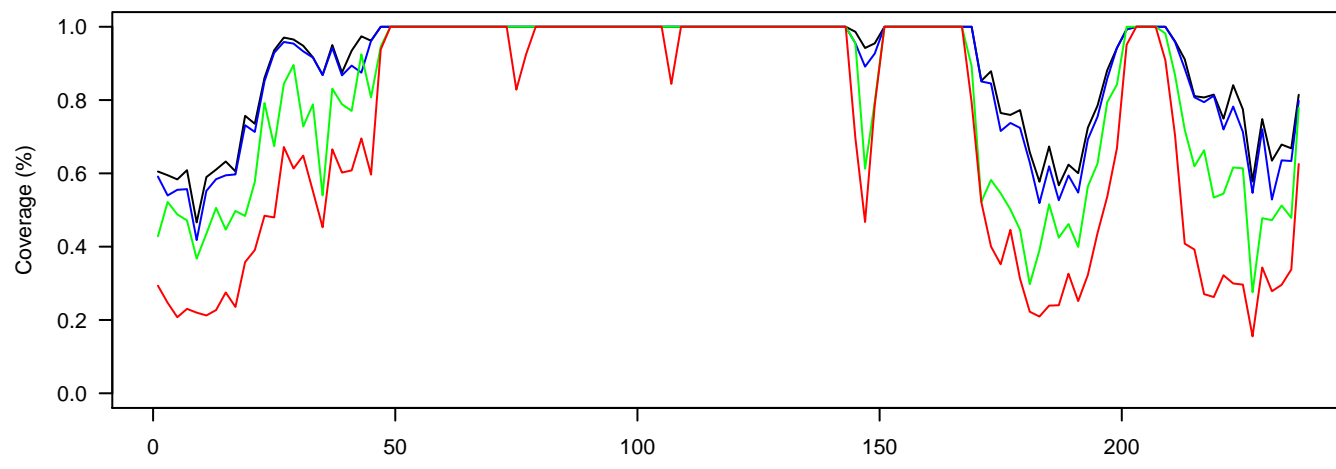

### Chromosome 3

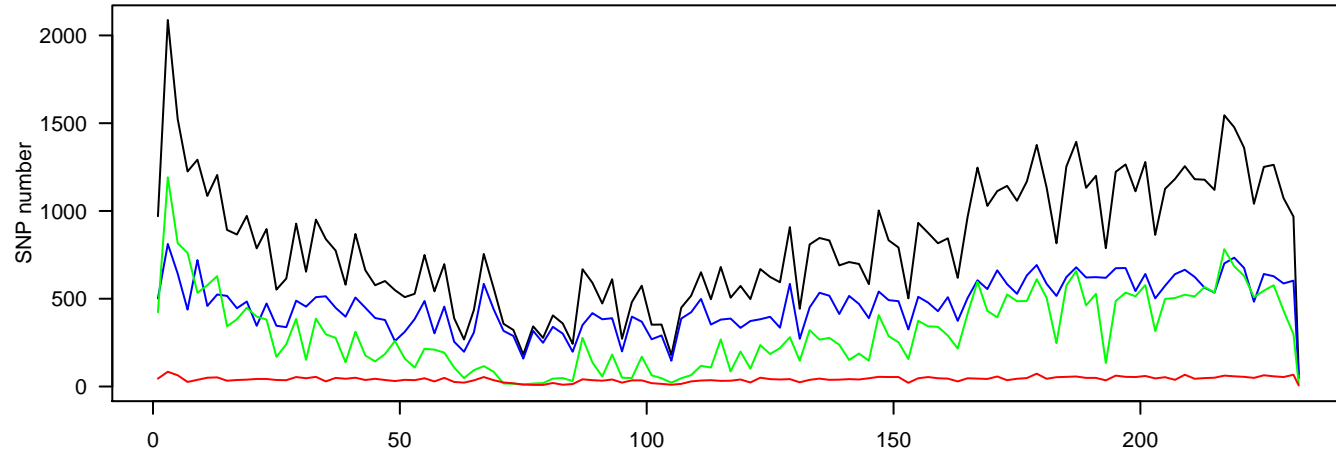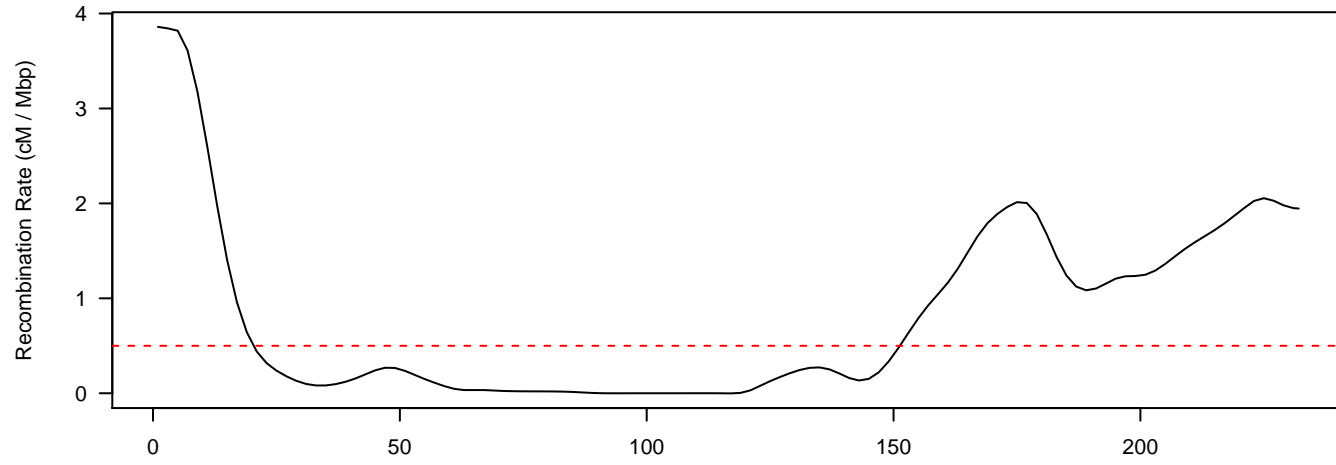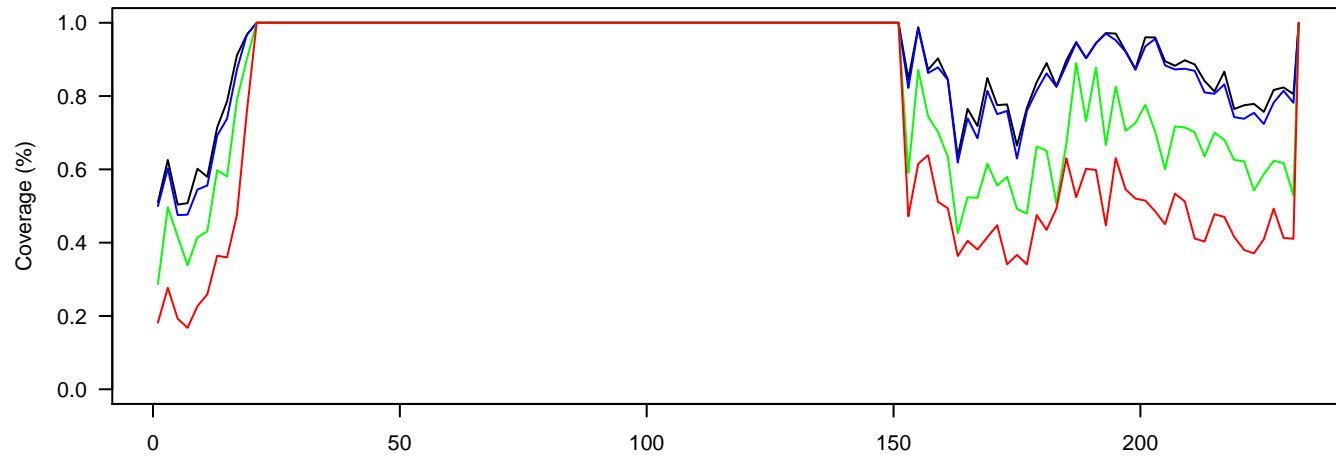

### Chromosome 4

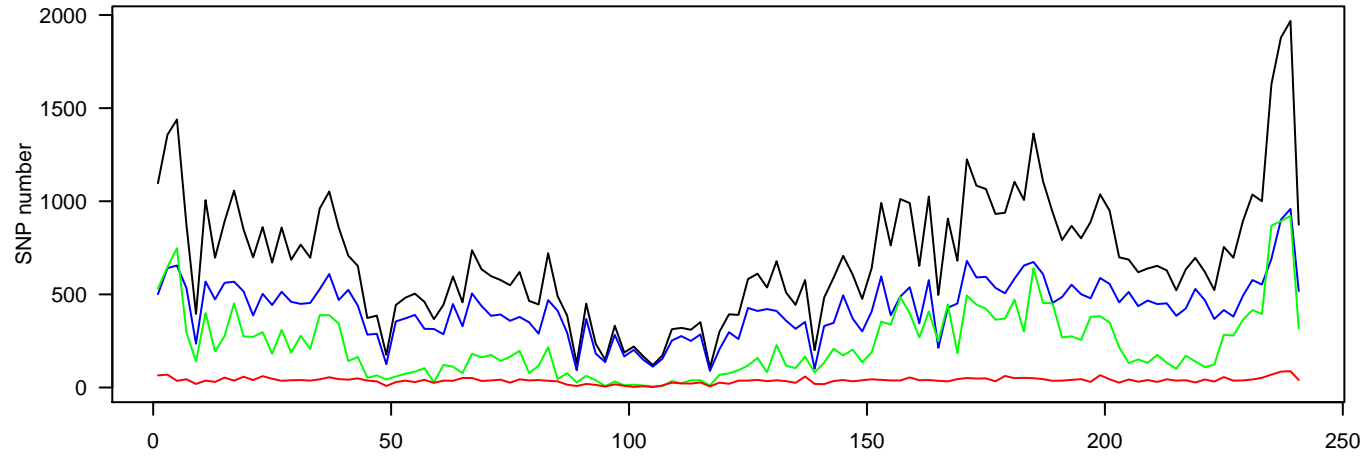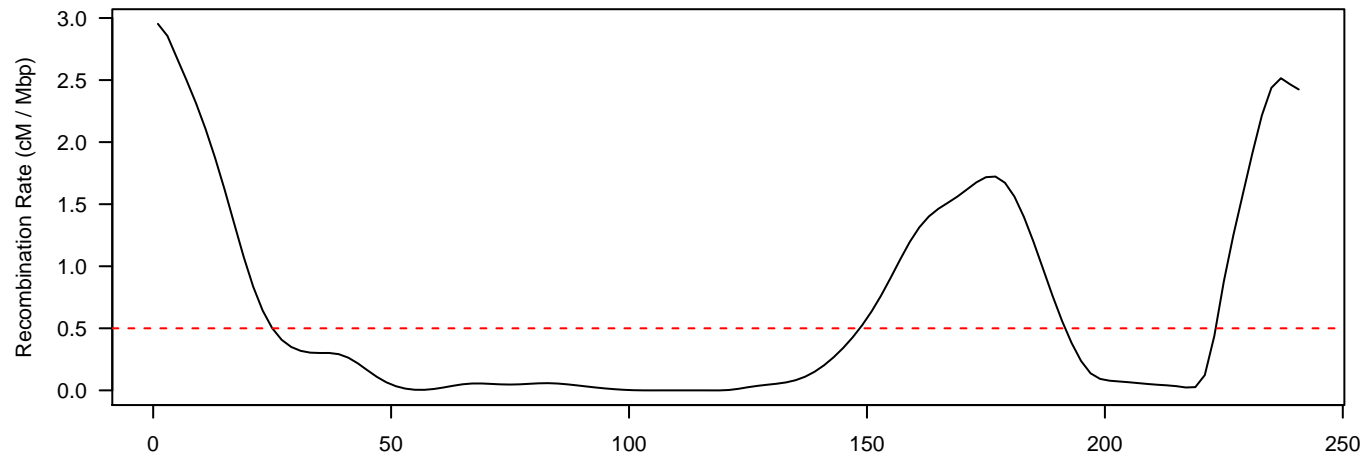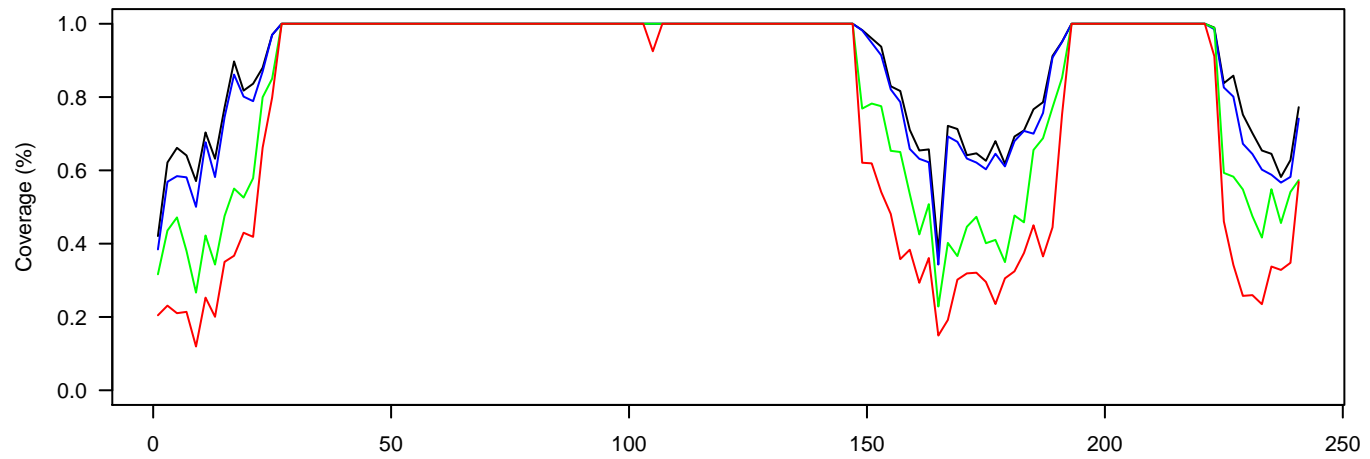

# Chromosome 5

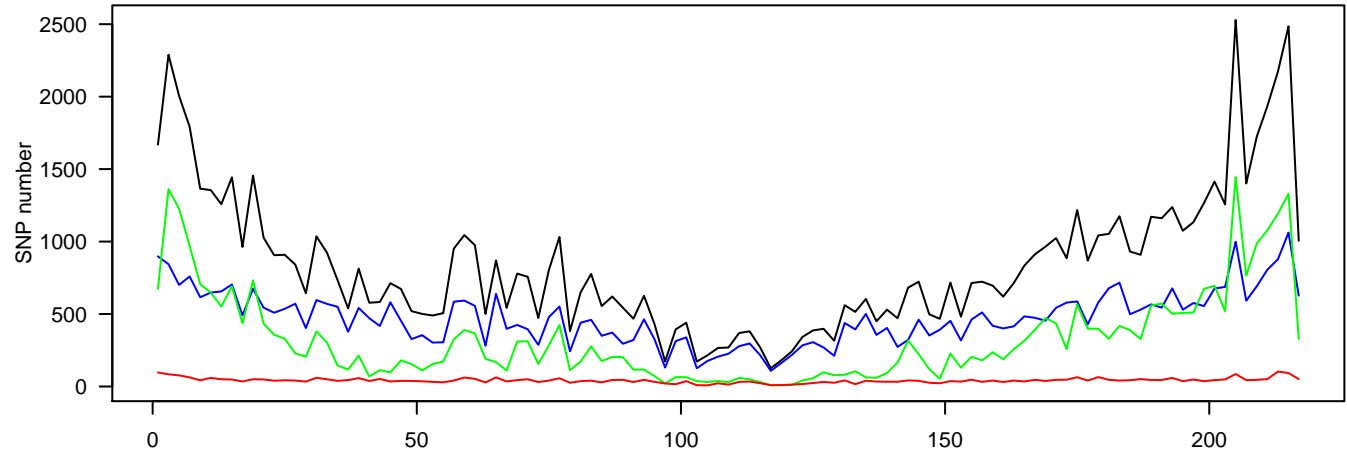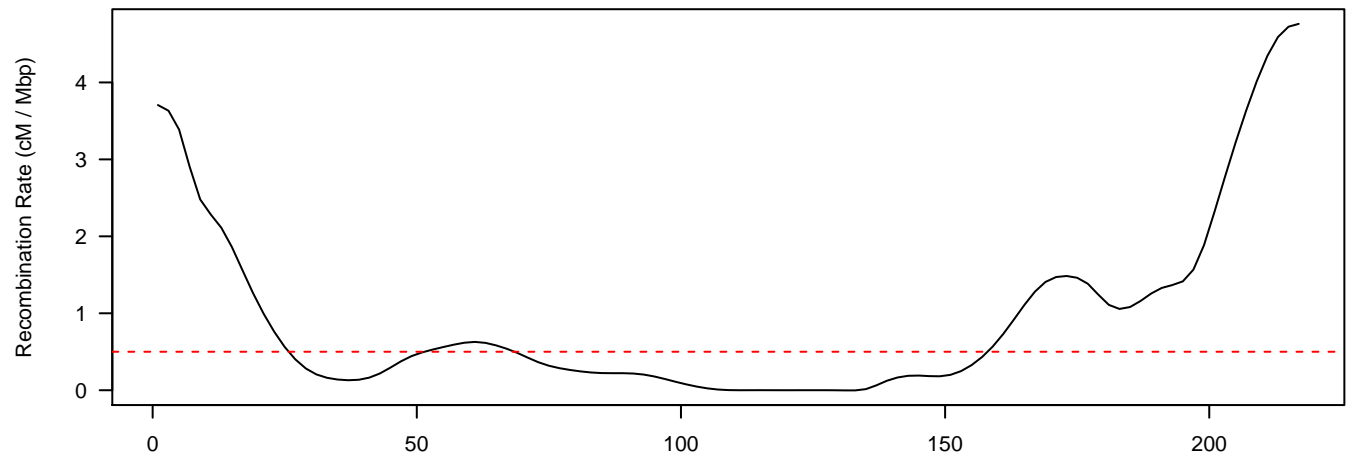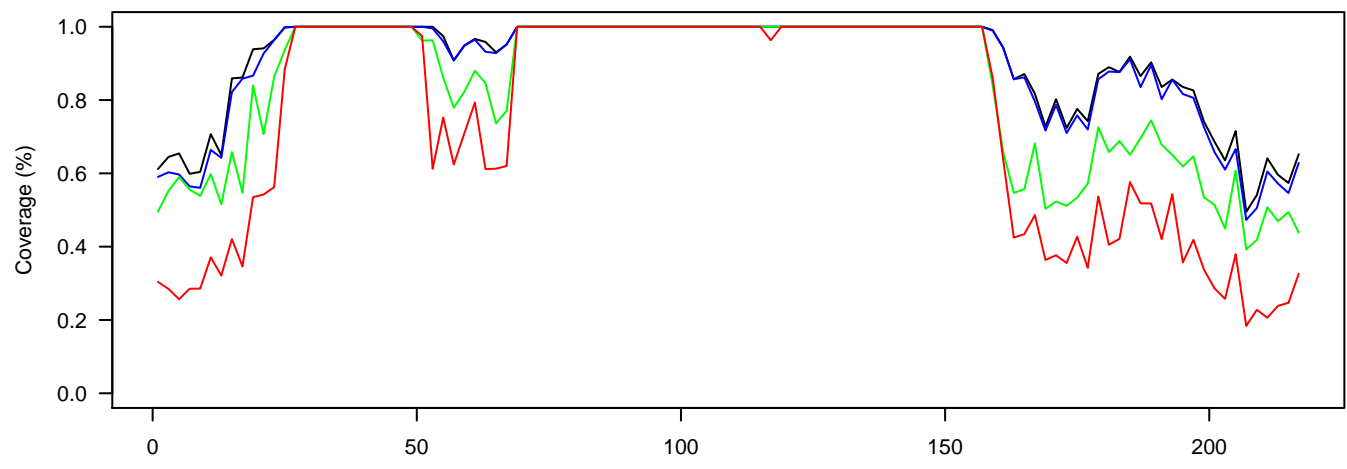

### Chromosome 6

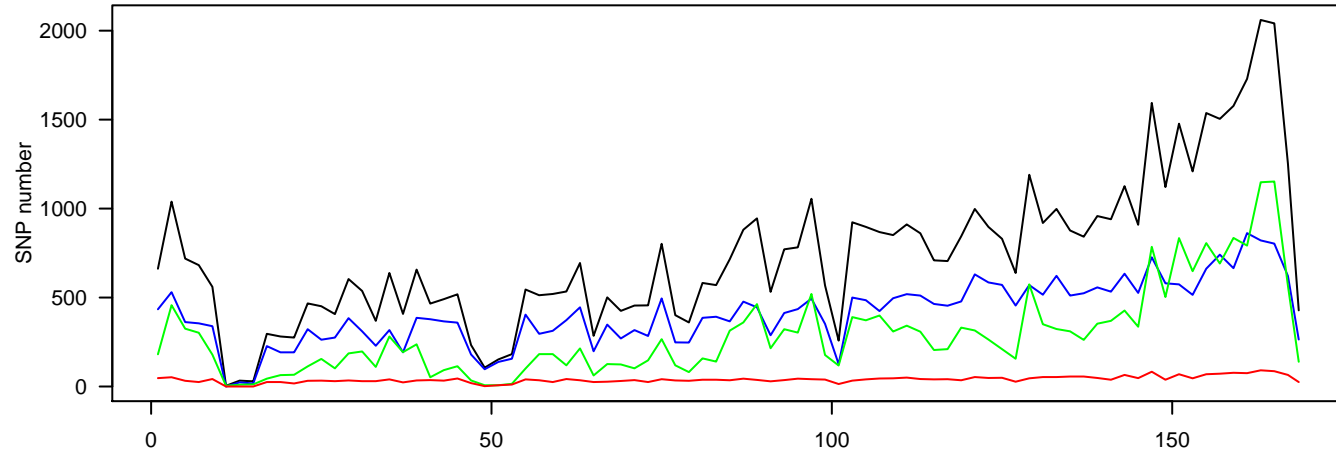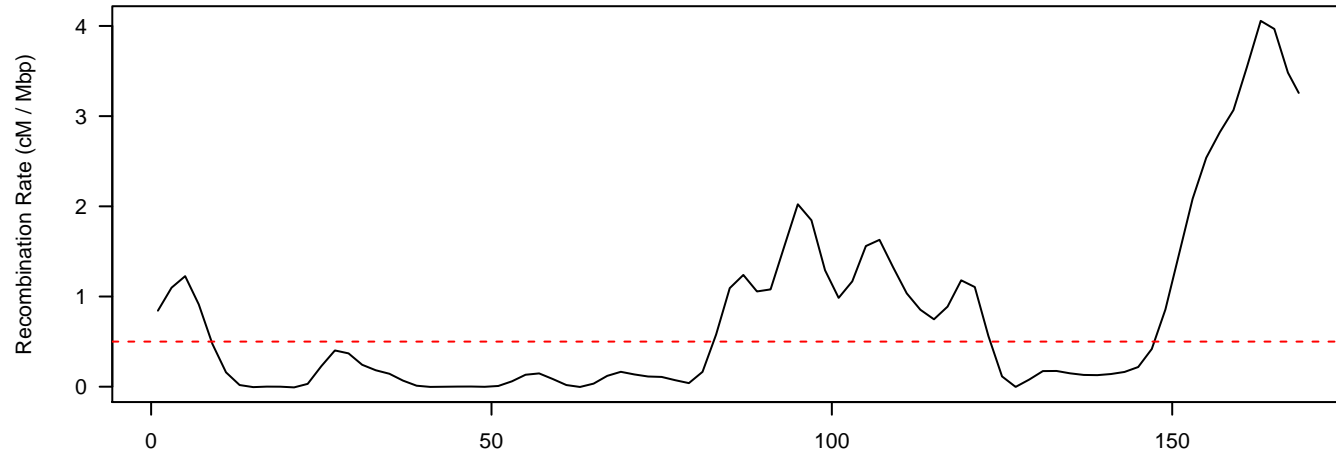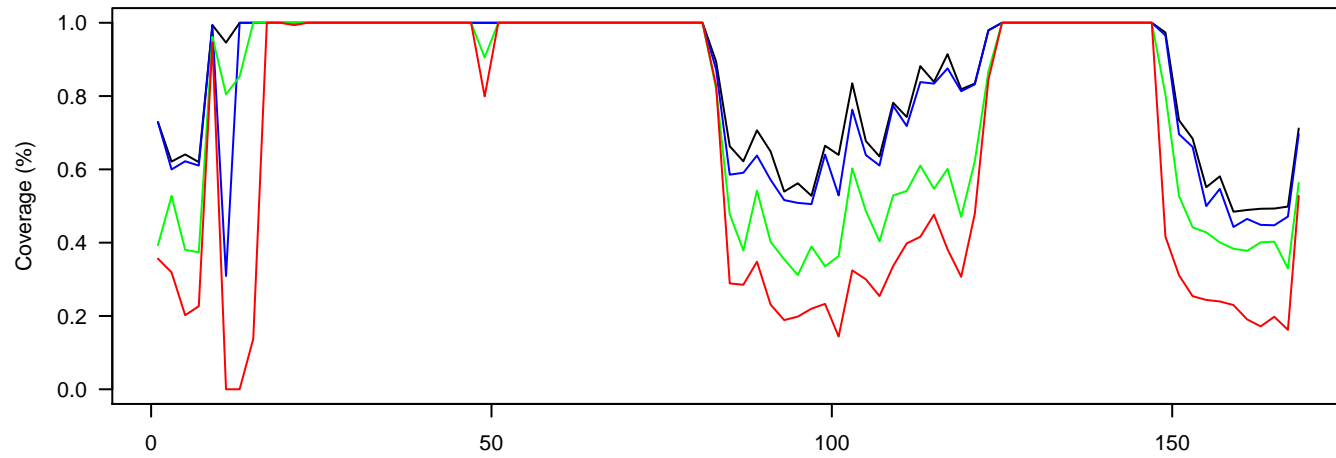

# Chromosome 7

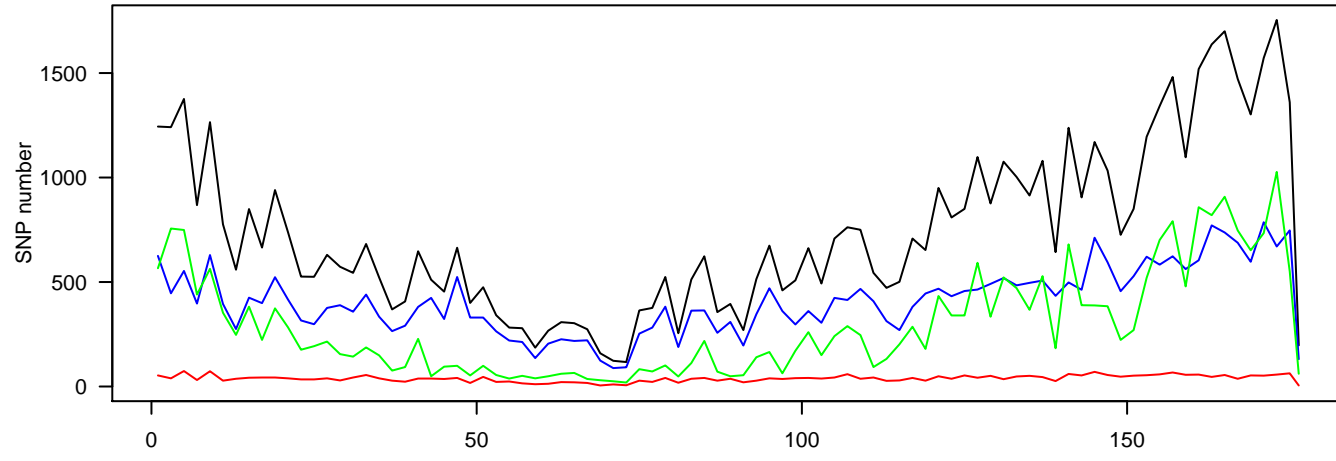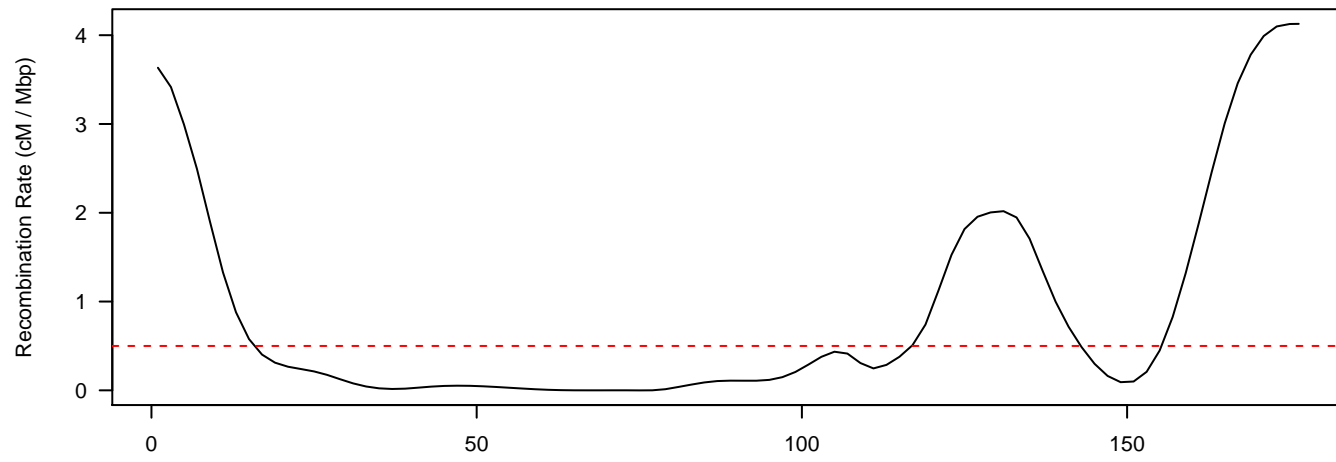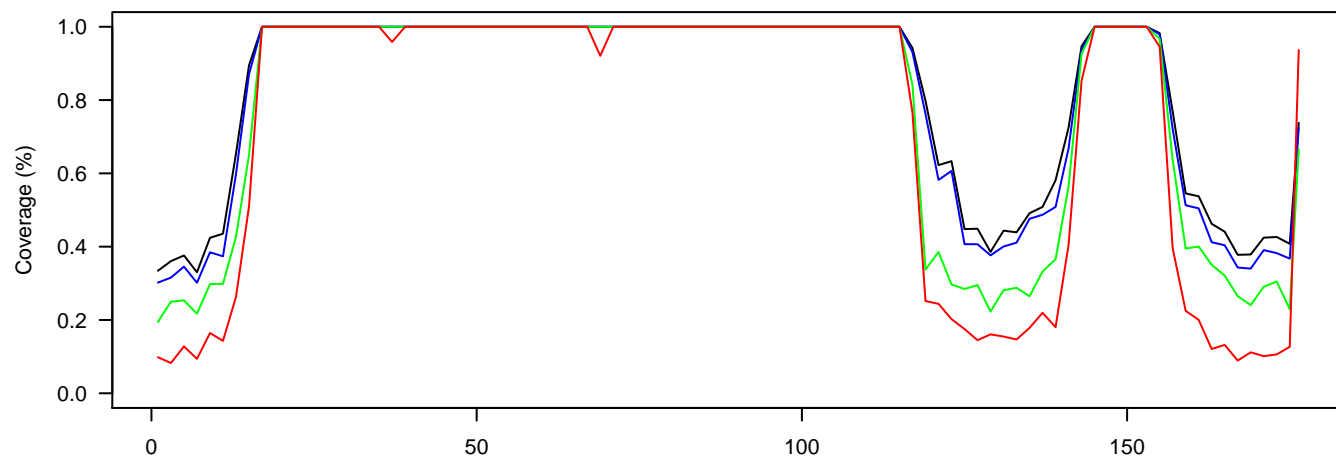

# Chromosome 8

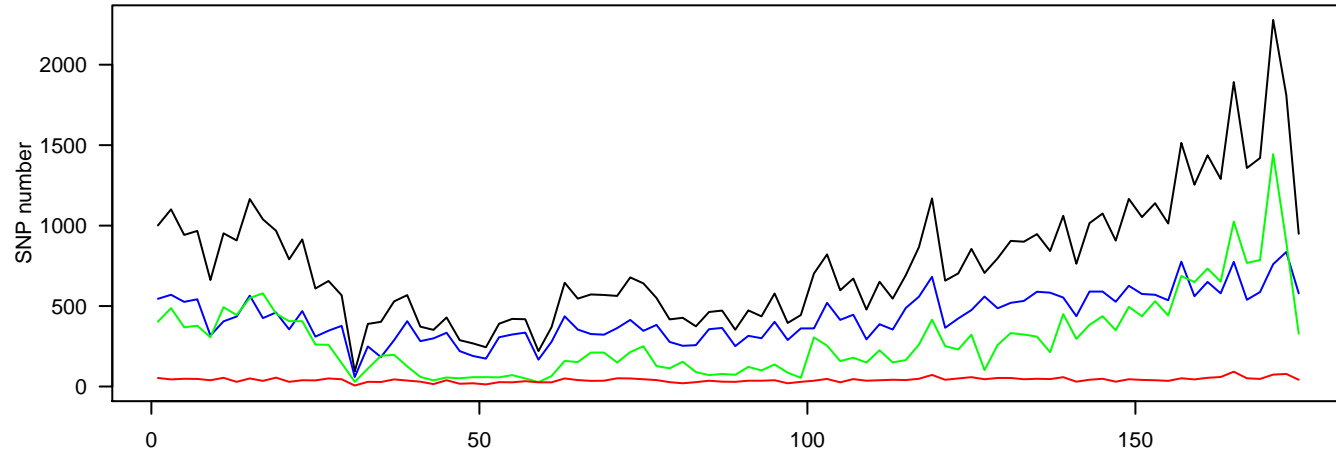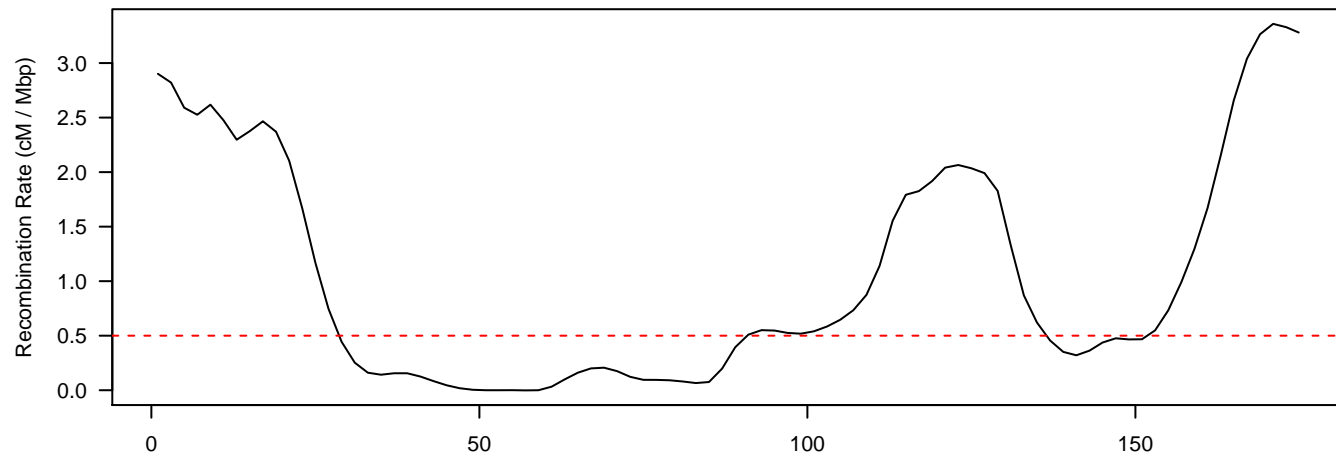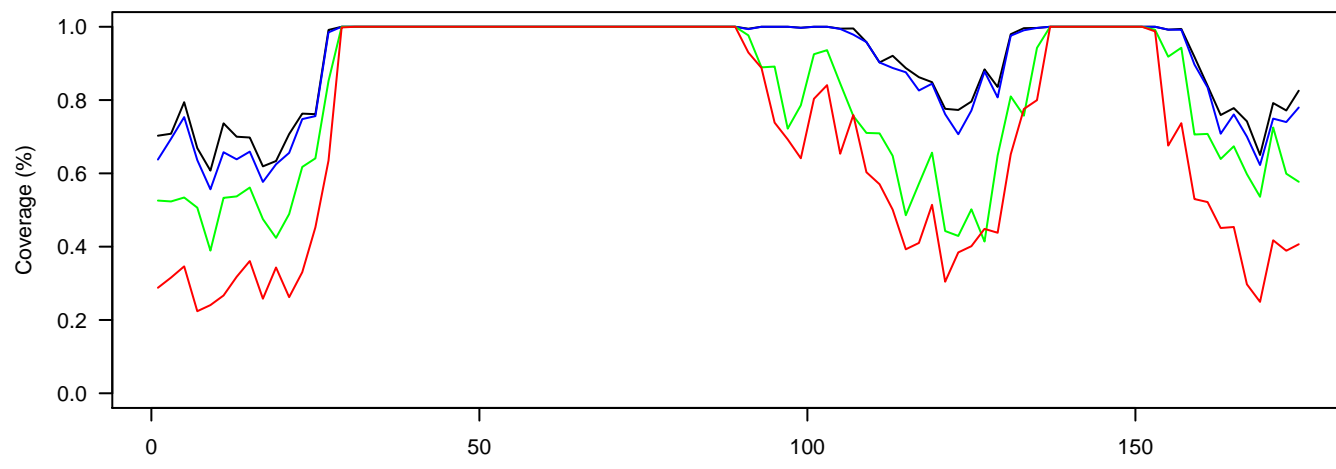



# Chromosome 9

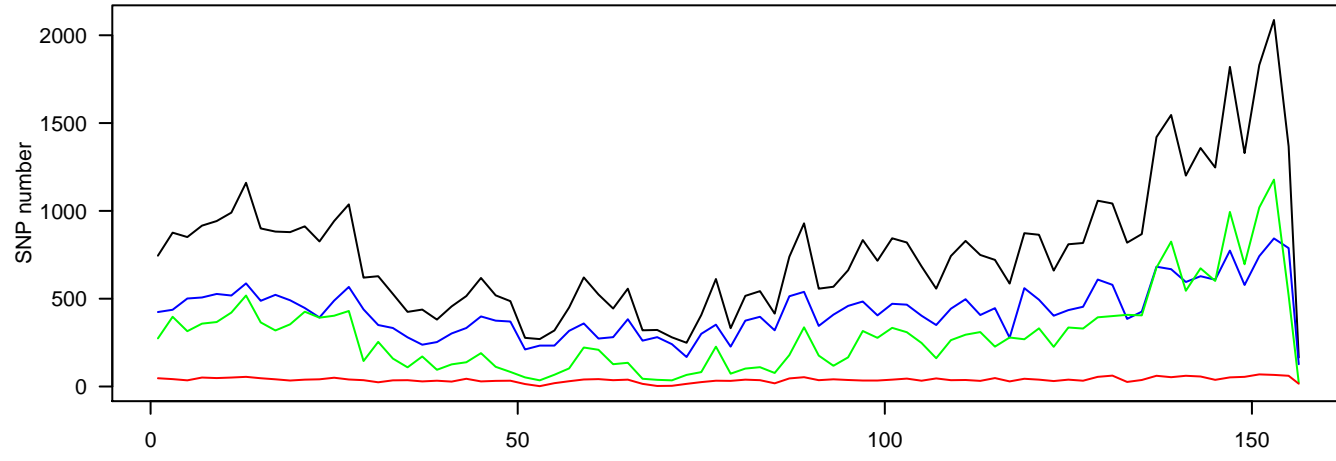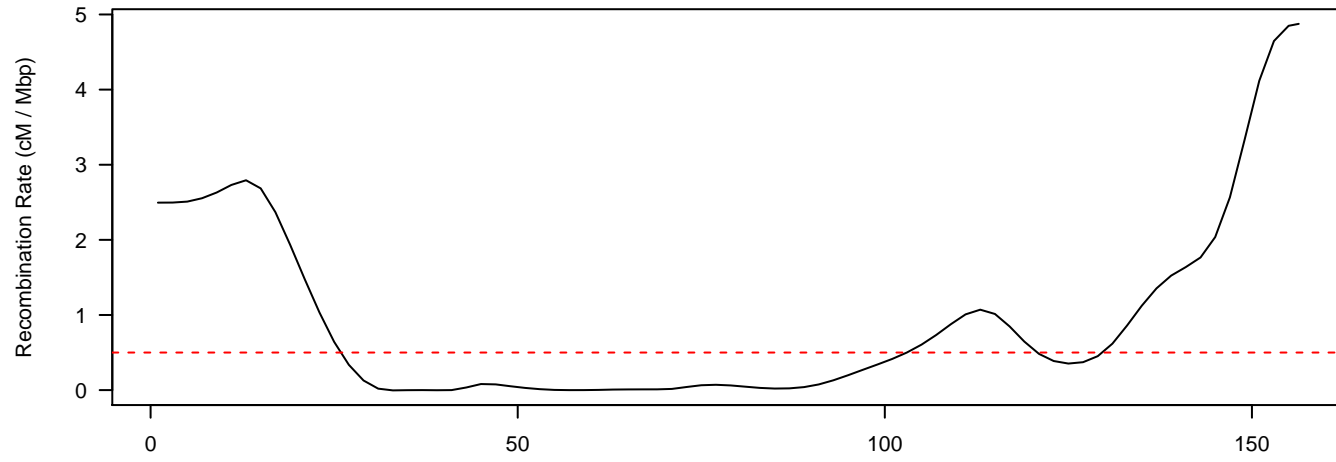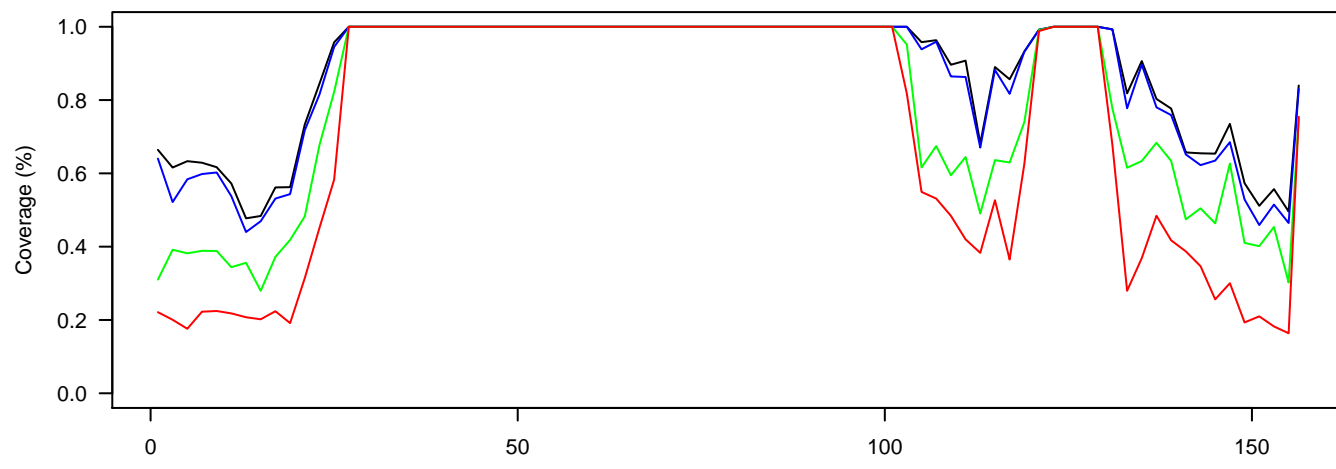

# Chromosome 10

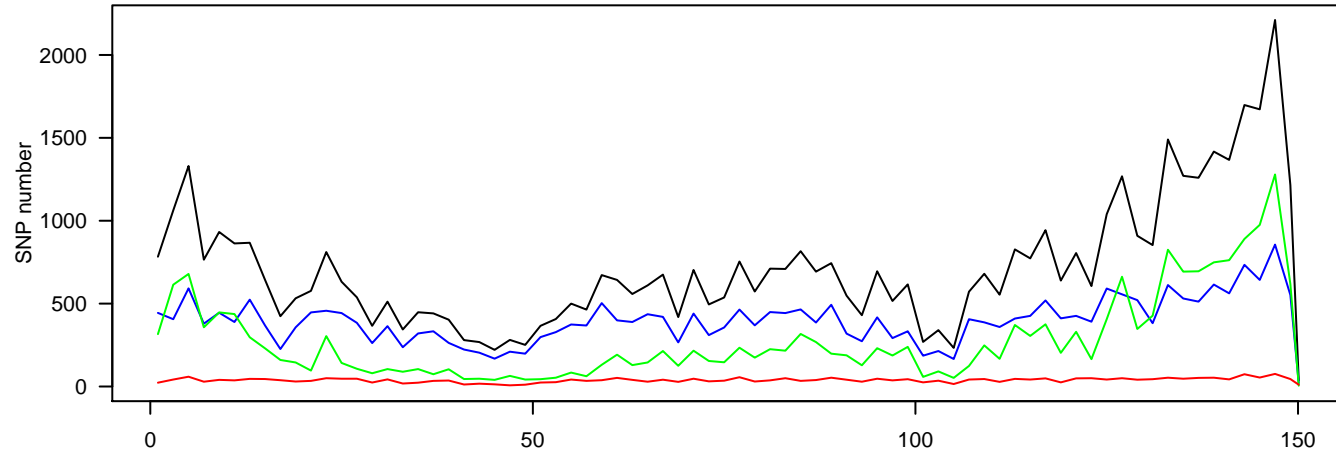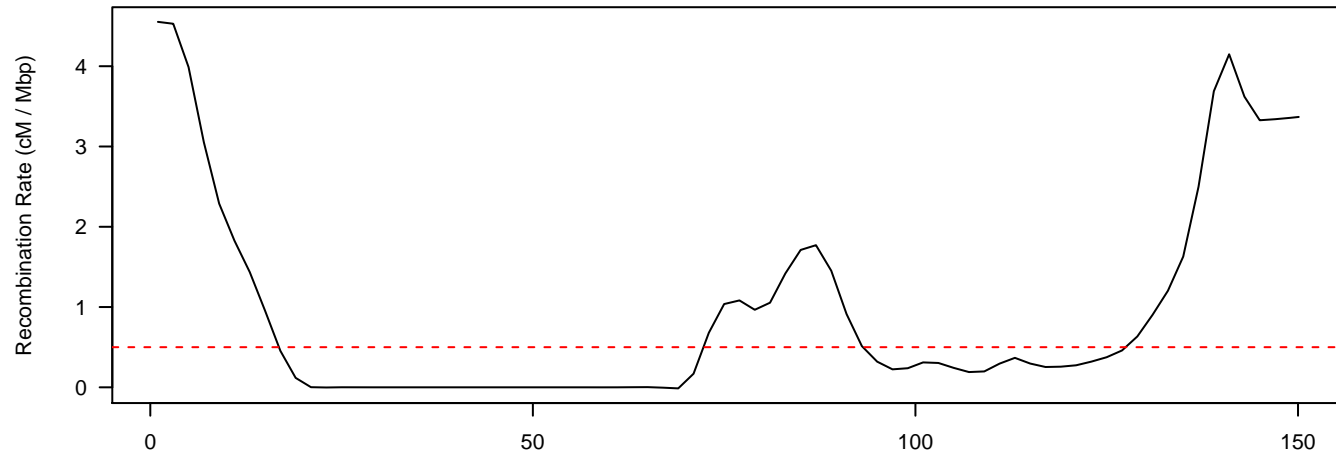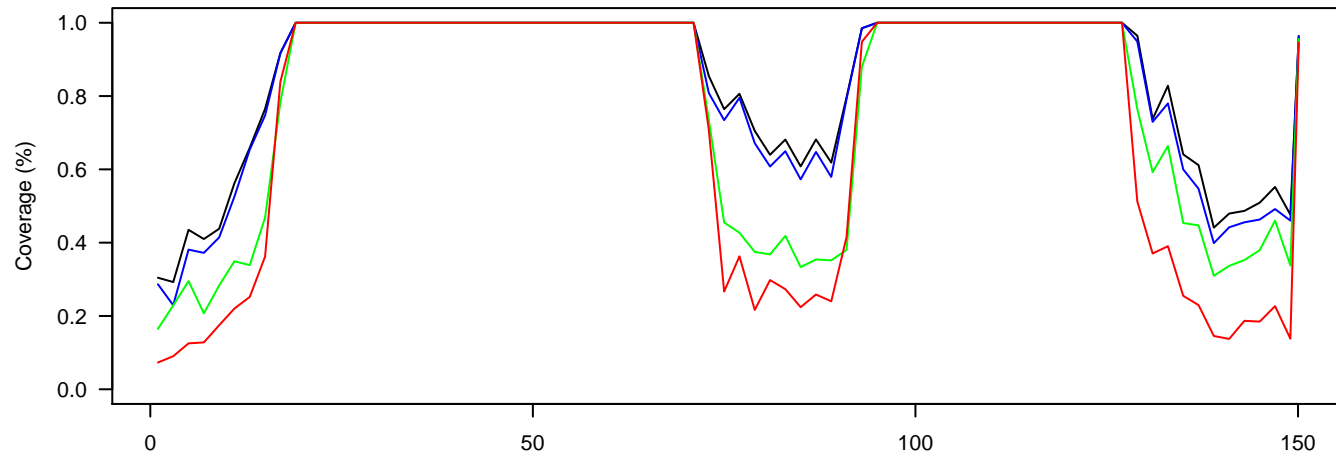

**Additional file 2 (.pdf):**

**Figure S2:** Variation of the markers density, the recombination rate and the genome coverage in non-overlapping 2 Mbp windows along each chromosome. The percentage SNP coverage (bottom) used the cumulated length of physical LD windows around each SNP. Markers have  $MAF \geq 5\%$ . Green, blue, red and black lines represent variation of GBS, 600K, 50K and combined technologies, respectively.
