# Supplementary material for: Genotyping-by-sequencing and SNP-arrays are complementary for detecting quantitative trait loci by tagging different haplotypes in association studies
Source: bioRxiv or medRxiv preprint supplement (doi:10.1101/476598), 2019-05-24
Supplement: Supplementary file [file media-8.pdf]

Additional\_File8\_TableS3\_QTLs\_Summary\_DTA

| QTLs summary for the male flowering time trait |     |     |            |            |          |         |                 |          |                  |          |                  |           |          |           |      |           |
|------------------------------------------------|-----|-----|------------|------------|----------|---------|-----------------|----------|------------------|----------|------------------|-----------|----------|-----------|------|-----------|
| Trait                                          | QTL | Chr | LowerLimit | UpperLimit | Rec      | NbSNP50 | LogPva<br>Max50 | NbSNP600 | LogPva<br>Max600 | NbSNPGBS | LogPva<br>MaxGBS | PosMax    | R2_LDMax | EffectMax | MAF  | NbDiffEnv |
| DTA                                            | 1   | 1   | 9412760    | 9462485    | High_rec | 0       | -               | 0        | -                | 1        | 5.24             | 9437625   | 0.07     | 0.65      | 0.19 | 1         |
| DTA                                            | 2   | 1   | 33276980   | 33489937   | High_rec | 0       | -               | 0        | -                | 2        | 5.21             | 33382893  | 0.07     | 0.89      | 0.09 | 1         |
| DTA                                            | 3   | 1   | 59721553   | 60348656   | Low_rec  | 0       | -               | 0        | -                | 2        | 5.13             | 60035082  | 0.07     | 0.6       | 0.23 | 2         |
| DTA                                            | 4   | 1   | 68437550   | 69242150   | Low_rec  | 7       | 5.47            | 51       | 5.38             | 2        | 5.5              | 68928621  | 0.08     | 0.64      | 0.34 | 1         |
| DTA                                            | 5   | 1   | 73144566   | 73461963   | High_rec | 2       | 5.22            | 2        | 5.12             | 5        | 6.11             | 73375502  | 0.09     | -0.7      | 0.45 | 2         |
| DTA                                            | 6   | 1   | 91410236   | 91536749   | High_rec | 0       | -               | 2        | 5.4              | 0        | -                | 91463722  | 0.08     | -0.81     | 0.1  | 1         |
| DTA                                            | 7   | 1   | 91815839   | 91925069   | High_rec | 0       | -               | 2        | 5.05             | 0        | -                | 91870110  | 0.07     | -0.61     | 0.13 | 1         |
| DTA                                            | 8   | 1   | 98678514   | 98847235   | High_rec | 0       | -               | 0        | -                | 1        | 5.29             | 98762607  | 0.08     | 0.73      | 0.07 | 1         |
| DTA                                            | 9   | 1   | 103106337  | 103733395  | Low_rec  | 0       | -               | 1        | 5.86             | 0        | -                | 103419866 | 0.09     | 0.81      | 0.21 | 1         |
| DTA                                            | 10  | 1   | 119340917  | 119968011  | Low_rec  | 0       | -               | 0        | -                | 2        | 6.58             | 119654482 | 0.1      | -0.68     | 0.14 | 1         |
| DTA                                            | 11  | 1   | 121084843  | 121711901  | Low_rec  | 0       | -               | 1        | 5.44             | 0        | -                | 121398372 | 0.08     | -0.59     | 0.06 | 1         |
| DTA                                            | 12  | 1   | 141448618  | 143627067  | Low_rec  | 3       | 6.29            | 30       | 7.04             | 3        | 7.1              | 142779888 | 0.11     | 0.82      | 0.12 | 2         |
| DTA                                            | 13  | 1   | 161013482  | 161320968  | High_rec | 0       | -               | 3        | 5.44             | 0        | -                | 161225117 | 0.08     | -0.78     | 0.41 | 1         |
| DTA                                            | 14  | 1   | 190520394  | 190828595  | High_rec | 0       | -               | 1        | 5.41             | 1        | 5.82             | 190601479 | 0.08     | 0.6       | 0.11 | 2         |
| DTA                                            | 15  | 1   | 191441325  | 191659759  | High_rec | 0       | -               | 5        | 6.32             | 1        | 5.16             | 191520075 | 0.09     | -0.7      | 0.17 | 2         |
| DTA                                            | 16  | 1   | 191817817  | 191973452  | High_rec | 1       | 5.03            | 0        | -                | 0        | -                | 191895721 | 0.07     | -0.8      | 0.29 | 1         |
| DTA                                            | 17  | 1   | 192330250  | 192483813  | High_rec | 1       | 5.1             | 0        | -                | 0        | -                | 192407092 | 0.07     | 0.69      | 0.13 | 1         |
| DTA                                            | 18  | 1   | 199041361  | 199182647  | High_rec | 0       | -               | 1        | 5.17             | 0        | -                | 199112016 | 0.07     | 0.73      | 0.28 | 1         |
| DTA                                            | 19  | 1   | 200550690  | 200698677  | High_rec | 0       | -               | 5        | 6.87             | 0        | -                | 200621381 | 0.1      | 0.74      | 0.38 | 1         |
| DTA                                            | 20  | 1   | 206383128  | 206520487  | High_rec | 0       | -               | 1        | 5.49             | 0        | -                | 206451847 | 0.08     | -0.69     | 0.06 | 1         |
| DTA                                            | 21  | 1   | 214062424  | 214204391  | High_rec | 0       | -               | 0        | -                | 3        | 5.5              | 214152875 | 0.08     | -0.72     | 0.34 | 1         |
| DTA                                            | 22  | 1   | 223991500  | 224070597  | High_rec | 0       | -               | 1        | 5.91             | 0        | -                | 224031064 | 0.08     | -0.58     | 0.16 | 1         |
| DTA                                            | 23  | 1   | 224730522  | 224809021  | High_rec | 0       | -               | 1        | 6.4              | 0        | -                | 224769772 | 0.09     | 0.73      | 0.44 | 1         |
| DTA                                            | 24  | 1   | 240198770  | 240350204  | High_rec | 0       | -               | 1        | 5.09             | 1        | 5.11             | 240273784 | 0.07     | -0.67     | 0.25 | 1         |
| DTA                                            | 25  | 1   | 243773599  | 244211557  | High_rec | 0       | -               | 16       | 6                | 1        | 5.06             | 244069402 | 0.09     | -0.59     | 0.07 | 3         |
| DTA                                            | 26  | 1   | 244372611  | 244613336  | High_rec | 0       | -               | 2        | 5.9              | 0        | -                | 244469790 | 0.09     | -0.55     | 0.07 | 3         |
| DTA                                            | 27  | 1   | 250197969  | 250426759  | High_rec | 0       | -               | 1        | 5.12             | 0        | -                | 250312380 | 0.07     | -0.71     | 0.11 | 1         |
| DTA                                            | 28  | 1   | 251327883  | 251554744  | High_rec | 0       | -               | 0        | -                | 1        | 5.55             | 251441389 | 0.08     | -0.66     | 0.37 | 1         |
| DTA                                            | 29  | 1   | 253611791  | 253828149  | High_rec | 0       | -               | 0        | -                | 1        | 5.5              | 253720139 | 0.08     | -0.67     | 0.2  | 1         |
| DTA                                            | 30  | 1   | 258714118  | 258893025  | High_rec | 0       | -               | 0        | -                | 4        | 5.11             | 258803741 | 0.07     | 0.53      | 0.08 | 1         |
| DTA                                            | 31  | 1   | 274919781  | 275050382  | High_rec | 0       | -               | 1        | 5.49             | 0        | -                | 274985167 | 0.08     | -0.69     | 0.12 | 1         |

Additional\_File8\_TableS3\_QTLs\_Summary\_DTA

|     |    |   |           |           |          |   |      |   |      |    |      |           |      |       |      |   |
|-----|----|---|-----------|-----------|----------|---|------|---|------|----|------|-----------|------|-------|------|---|
| DTA | 32 | 1 | 277996116 | 278146962 | High_rec | 0 | -    | 2 | 5.15 | 11 | 7.58 | 278053884 | 0.11 | -0.69 | 0.41 | 9 |
| DTA | 33 | 1 | 285059501 | 285131438 | High_rec | 0 | -    | 0 | -    | 2  | 5.26 | 285095492 | 0.07 | -0.6  | 0.17 | 1 |
| DTA | 34 | 1 | 287154946 | 287222350 | High_rec | 0 | -    | 0 | -    | 1  | 5.54 | 287188664 | 0.08 | -0.81 | 0.11 | 1 |
| DTA | 35 | 1 | 290488613 | 290555045 | High_rec | 0 | -    | 0 | -    | 3  | 5.56 | 290520629 | 0.08 | 0.54  | 0.14 | 1 |
| DTA | 36 | 1 | 292245640 | 292309610 | High_rec | 0 | -    | 2 | 6.75 | 0  | -    | 292277680 | 0.1  | -1.14 | 0.42 | 6 |
| DTA | 37 | 1 | 296219681 | 296285986 | High_rec | 0 | -    | 0 | -    | 1  | 5.4  | 296252824 | 0.08 | -0.76 | 0.31 | 1 |
| DTA | 38 | 1 | 296957424 | 297024127 | High_rec | 0 | -    | 1 | 6.24 | 1  | 6.02 | 296990773 | 0.09 | 0.48  | 0.34 | 2 |
| DTA | 39 | 1 | 297756106 | 297823122 | High_rec | 0 | -    | 1 | 5.7  | 0  | -    | 297789612 | 0.08 | 0.94  | 0.36 | 1 |
| DTA | 40 | 1 | 298097191 | 298175479 | High_rec | 0 | -    | 1 | 5.34 | 6  | 5.77 | 298136801 | 0.08 | 0.89  | 0.16 | 3 |
| DTA | 41 | 1 | 299437038 | 299504398 | High_rec | 0 | -    | 0 | -    | 1  | 5.16 | 299470717 | 0.07 | 0.52  | 0.1  | 1 |
| DTA | 42 | 2 | 6986272   | 7001685   | High_rec | 0 | -    | 0 | -    | 1  | 5.18 | 6993989   | 0.07 | 0.51  | 0.14 | 1 |
| DTA | 43 | 2 | 7033036   | 7048461   | High_rec | 0 | -    | 0 | -    | 1  | 5.53 | 7040758   | 0.08 | 0.54  | 0.1  | 1 |
| DTA | 44 | 2 | 8997009   | 9012987   | High_rec | 0 | -    | 1 | 5.28 | 0  | -    | 9005005   | 0.07 | 0.73  | 0.43 | 1 |
| DTA | 45 | 2 | 11358522  | 11375394  | High_rec | 0 | -    | 1 | 5.02 | 0  | -    | 11366954  | 0.07 | 0.54  | 0.05 | 1 |
| DTA | 46 | 2 | 13270400  | 13288322  | High_rec | 0 | -    | 1 | 5.41 | 0  | -    | 13279352  | 0.08 | 0.69  | 0.09 | 1 |
| DTA | 47 | 2 | 13293495  | 13311432  | High_rec | 0 | -    | 0 | -    | 1  | 5.57 | 13302453  | 0.08 | -0.92 | 0.49 | 1 |
| DTA | 48 | 2 | 13581537  | 13599681  | High_rec | 0 | -    | 0 | -    | 2  | 5.28 | 13590587  | 0.07 | 0.6   | 0.28 | 1 |
| DTA | 49 | 2 | 14213352  | 14239093  | High_rec | 0 | -    | 1 | 6.34 | 3  | 6.25 | 14227211  | 0.09 | 0.73  | 0.16 | 3 |
| DTA | 50 | 2 | 14796966  | 14816087  | High_rec | 0 | -    | 0 | -    | 1  | 5.83 | 14806534  | 0.08 | 0.73  | 0.37 | 1 |
| DTA | 51 | 2 | 16391809  | 16412713  | High_rec | 0 | -    | 0 | -    | 1  | 5.06 | 16402259  | 0.07 | 0.66  | 0.12 | 1 |
| DTA | 52 | 2 | 16444935  | 16465910  | High_rec | 0 | -    | 1 | 5.04 | 0  | -    | 16455422  | 0.07 | 0.65  | 0.09 | 1 |
| DTA | 53 | 2 | 16520595  | 16541672  | High_rec | 0 | -    | 1 | 5.04 | 0  | -    | 16531136  | 0.07 | 0.65  | 0.09 | 1 |
| DTA | 54 | 2 | 18120928  | 18145309  | High_rec | 0 | -    | 1 | 5.61 | 2  | 5.51 | 18133446  | 0.08 | 0.46  | 0.17 | 1 |
| DTA | 55 | 2 | 55423318  | 56364083  | Low_rec  | 0 | -    | 0 | -    | 2  | 5.1  | 55893619  | 0.07 | 0.58  | 0.12 | 1 |
| DTA | 56 | 2 | 56596843  | 58113790  | Low_rec  | 0 | -    | 1 | 5.13 | 7  | 6.95 | 57643489  | 0.1  | 0.68  | 0.35 | 1 |
| DTA | 57 | 2 | 60331863  | 61383720  | Low_rec  | 0 | -    | 1 | 5.39 | 3  | 5.33 | 60802164  | 0.08 | -0.71 | 0.15 | 5 |
| DTA | 58 | 2 | 106809276 | 107749878 | Low_rec  | 0 | -    | 1 | 5.15 | 0  | -    | 107279577 | 0.07 | -0.42 | 0.31 | 1 |
| DTA | 59 | 2 | 148672935 | 148774173 | High_rec | 0 | -    | 0 | -    | 2  | 5.32 | 148723525 | 0.07 | 0.51  | 0.05 | 1 |
| DTA | 60 | 2 | 166858104 | 167803778 | Low_rec  | 0 | -    | 2 | 5.22 | 0  | -    | 167328405 | 0.08 | -0.9  | 0.49 | 2 |
| DTA | 61 | 2 | 168272781 | 168369711 | High_rec | 0 | -    | 0 | -    | 1  | 5.07 | 168321434 | 0.07 | 0.38  | 0.23 | 1 |
| DTA | 62 | 2 | 172683758 | 172734763 | High_rec | 0 | -    | 1 | 5    | 0  | -    | 172709310 | 0.07 | 0.53  | 0.37 | 1 |
| DTA | 63 | 2 | 186521673 | 186541636 | High_rec | 0 | -    | 0 | -    | 3  | 5.26 | 186531646 | 0.07 | -0.4  | 0.25 | 1 |
| DTA | 64 | 2 | 197067107 | 197136623 | High_rec | 0 | -    | 1 | 5.19 | 5  | 5.47 | 197094623 | 0.08 | 0.71  | 0.44 | 1 |
| DTA | 65 | 2 | 199349568 | 199536919 | High_rec | 3 | 5.08 | 9 | 6.16 | 1  | 5.31 | 199460654 | 0.09 | 0.58  | 0.49 | 1 |

Additional\_File8\_TableS3\_QTLs\_Summary\_DTA

|     |    |   |           |           |          |   |      |    |       |    |      |           |      |       |      |    |
|-----|----|---|-----------|-----------|----------|---|------|----|-------|----|------|-----------|------|-------|------|----|
| DTA | 66 | 2 | 207364073 | 208827558 | Low_rec  | 0 | -    | 1  | 6.01  | 2  | 5.62 | 208342478 | 0.08 | -0.43 | 0.23 | 2  |
| DTA | 67 | 2 | 208968586 | 209119585 | High_rec | 0 | -    | 2  | 5.24  | 1  | 5.32 | 209019179 | 0.07 | -0.56 | 0.1  | 1  |
| DTA | 68 | 2 | 211467348 | 211548324 | High_rec | 1 | 5.53 | 12 | 5.78  | 0  | -    | 211498614 | 0.08 | -0.68 | 0.08 | 2  |
| DTA | 69 | 2 | 212500911 | 212572169 | High_rec | 0 | -    | 0  | -     | 2  | 5.65 | 212528156 | 0.08 | -0.6  | 0.06 | 2  |
| DTA | 70 | 2 | 213819313 | 213866158 | High_rec | 0 | -    | 0  | -     | 1  | 5.46 | 213842774 | 0.08 | -0.57 | 0.13 | 1  |
| DTA | 71 | 2 | 213928443 | 213974773 | High_rec | 0 | -    | 0  | -     | 1  | 5.1  | 213951629 | 0.07 | -0.55 | 0.11 | 1  |
| DTA | 72 | 2 | 223928733 | 223957695 | High_rec | 0 | -    | 0  | -     | 1  | 5.54 | 223943207 | 0.08 | 0.86  | 0.1  | 1  |
| DTA | 73 | 2 | 224227355 | 224256186 | High_rec | 0 | -    | 0  | -     | 1  | 5.06 | 224241764 | 0.07 | 0.47  | 0.06 | 1  |
| DTA | 74 | 2 | 224917782 | 224946323 | High_rec | 0 | -    | 0  | -     | 1  | 5.58 | 224932057 | 0.08 | 0.48  | 0.06 | 1  |
| DTA | 75 | 2 | 230278956 | 230305090 | High_rec | 0 | -    | 1  | 5.06  | 0  | -    | 230291994 | 0.07 | 0.5   | 0.05 | 1  |
| DTA | 76 | 2 | 230857985 | 230883880 | High_rec | 0 | -    | 0  | -     | 1  | 5.04 | 230870945 | 0.07 | 0.48  | 0.06 | 1  |
| DTA | 77 | 2 | 230928302 | 230954171 | High_rec | 0 | -    | 0  | -     | 1  | 5.16 | 230941253 | 0.07 | 0.5   | 0.13 | 1  |
| DTA | 78 | 2 | 232368497 | 232393952 | High_rec | 0 | -    | 0  | -     | 1  | 5.04 | 232381225 | 0.07 | 0.47  | 0.08 | 1  |
| DTA | 79 | 3 | 1712890   | 1730095   | High_rec | 0 | -    | 0  | -     | 4  | 5.81 | 1721803   | 0.08 | -0.68 | 0.05 | 2  |
| DTA | 80 | 3 | 3413843   | 3430601   | High_rec | 0 | -    | 0  | -     | 1  | 5.24 | 3422282   | 0.07 | -0.58 | 0.06 | 1  |
| DTA | 81 | 3 | 6642338   | 6659878   | High_rec | 0 | -    | 1  | 5.84  | 0  | -    | 6651074   | 0.08 | -0.72 | 0.14 | 1  |
| DTA | 82 | 3 | 8292602   | 8311838   | High_rec | 0 | -    | 0  | -     | 6  | 6.35 | 8302274   | 0.09 | 0.54  | 0.08 | 2  |
| DTA | 83 | 3 | 8587994   | 8607612   | High_rec | 0 | -    | 0  | -     | 1  | 6.64 | 8597802   | 0.09 | 0.55  | 0.09 | 2  |
| DTA | 84 | 3 | 8815548   | 8835644   | High_rec | 0 | -    | 3  | 5.59  | 0  | -    | 8825490   | 0.08 | 0.77  | 0.3  | 3  |
| DTA | 85 | 3 | 8879633   | 8913904   | High_rec | 0 | -    | 3  | 6.58  | 0  | -    | 8903812   | 0.1  | 0.89  | 0.42 | 10 |
| DTA | 86 | 3 | 12521484  | 12551971  | High_rec | 0 | -    | 1  | 5.01  | 0  | -    | 12536723  | 0.07 | -0.61 | 0.31 | 1  |
| DTA | 87 | 3 | 25454770  | 27163541  | Low_rec  | 0 | -    | 0  | -     | 2  | 5.1  | 26309157  | 0.07 | -0.77 | 0.18 | 1  |
| DTA | 88 | 3 | 55471352  | 57180122  | Low_rec  | 0 | -    | 0  | -     | 2  | 5.63 | 56325736  | 0.08 | -0.42 | 0.41 | 1  |
| DTA | 89 | 3 | 137532602 | 140141215 | Low_rec  | 3 | 5.44 | 35 | 6.06  | 1  | 5.06 | 138854581 | 0.09 | -0.95 | 0.49 | 2  |
| DTA | 90 | 3 | 140585208 | 144639766 | Low_rec  | 2 | 6.99 | 26 | 6.73  | 16 | 7.35 | 142238101 | 0.11 | 1.12  | 0.17 | 5  |
| DTA | 91 | 3 | 145752286 | 150653795 | Low_rec  | 3 | 6.51 | 36 | 6.99  | 13 | 5.46 | 148664485 | 0.1  | 0.92  | 0.15 | 6  |
| DTA | 92 | 3 | 154367733 | 154461554 | High_rec | 0 | -    | 3  | 5.45  | 0  | -    | 154411069 | 0.08 | 0.9   | 0.32 | 1  |
| DTA | 93 | 3 | 154519865 | 154605025 | High_rec | 1 | 5.12 | 1  | 5.12  | 0  | -    | 154562528 | 0.07 | 0.86  | 0.33 | 1  |
| DTA | 94 | 3 | 155917709 | 155992889 | High_rec | 0 | -    | 0  | -     | 1  | 6.11 | 155955338 | 0.09 | -0.98 | 0.31 | 1  |
| DTA | 95 | 3 | 158943646 | 159005990 | High_rec | 0 | -    | 5  | 10.03 | 0  | -    | 158974594 | 0.15 | 1.27  | 0.41 | 19 |
| DTA | 96 | 3 | 159360179 | 159586486 | High_rec | 0 | -    | 46 | 5.45  | 0  | -    | 159448298 | 0.08 | 0.58  | 0.48 | 4  |
| DTA | 97 | 3 | 159595541 | 159655257 | High_rec | 0 | -    | 1  | 5.01  | 0  | -    | 159625434 | 0.07 | 0.56  | 0.47 | 1  |
| DTA | 98 | 3 | 159782041 | 159841200 | High_rec | 0 | -    | 0  | -     | 3  | 6.35 | 159811623 | 0.09 | -0.87 | 0.46 | 1  |
| DTA | 99 | 3 | 162574060 | 162624496 | High_rec | 0 | -    | 0  | -     | 1  | 5.05 | 162599291 | 0.07 | -0.56 | 0.27 | 1  |

Additional\_File8\_TableS3\_QTLs\_Summary\_DTA

|     |     |   |           |           |          |   |      |    |      |   |      |           |      |       |      |   |
|-----|-----|---|-----------|-----------|----------|---|------|----|------|---|------|-----------|------|-------|------|---|
| DTA | 100 | 3 | 163676681 | 163723804 | High_rec | 0 | -    | 1  | 5.49 | 0 | -    | 163700269 | 0.08 | -0.95 | 0.17 | 2 |
| DTA | 101 | 3 | 163972187 | 164018493 | High_rec | 0 | -    | 0  | -    | 3 | 5.02 | 163995336 | 0.07 | -0.57 | 0.37 | 1 |
| DTA | 102 | 3 | 165274981 | 165317710 | High_rec | 0 | -    | 1  | 5.17 | 0 | -    | 165296347 | 0.07 | 0.84  | 0.16 | 1 |
| DTA | 103 | 3 | 165427668 | 165471724 | High_rec | 0 | -    | 2  | 5.18 | 0 | -    | 165448854 | 0.07 | 0.52  | 0.31 | 1 |
| DTA | 104 | 3 | 165592565 | 165659993 | High_rec | 0 | -    | 7  | 5.6  | 0 | -    | 165635244 | 0.08 | 0.78  | 0.25 | 3 |
| DTA | 105 | 3 | 171694302 | 171727936 | High_rec | 0 | -    | 0  | -    | 1 | 5.06 | 171711133 | 0.07 | 0.91  | 0.16 | 1 |
| DTA | 106 | 3 | 201698083 | 201749279 | High_rec | 0 | -    | 1  | 5.74 | 0 | -    | 201723696 | 0.08 | -0.91 | 0.21 | 2 |
| DTA | 107 | 3 | 204451988 | 204500058 | High_rec | 0 | -    | 0  | -    | 1 | 5.49 | 204476019 | 0.07 | 0.64  | 0.16 | 2 |
| DTA | 108 | 3 | 223546445 | 223579080 | High_rec | 3 | 5.35 | 1  | 5.01 | 0 | -    | 223563333 | 0.07 | -0.56 | 0.2  | 1 |
| DTA | 109 | 4 | 2674628   | 2698286   | High_rec | 0 | -    | 1  | 5.46 | 2 | 5.37 | 2682294   | 0.08 | -0.65 | 0.28 | 2 |
| DTA | 110 | 4 | 4469555   | 4485666   | High_rec | 0 | -    | 0  | -    | 1 | 5.23 | 4477646   | 0.07 | -0.53 | 0.26 | 1 |
| DTA | 111 | 4 | 4988364   | 5004759   | High_rec | 0 | -    | 0  | -    | 1 | 6.03 | 4996600   | 0.08 | -0.54 | 0.17 | 1 |
| DTA | 112 | 4 | 13785789  | 13831012  | High_rec | 0 | -    | 1  | 5.78 | 3 | 5.54 | 13798122  | 0.08 | -0.9  | 0.16 | 2 |
| DTA | 113 | 4 | 25989639  | 27598037  | Low_rec  | 0 | -    | 0  | -    | 3 | 5.49 | 26793837  | 0.08 | -0.69 | 0.11 | 1 |
| DTA | 114 | 4 | 64800912  | 67876192  | Low_rec  | 1 | 5.08 | 0  | -    | 1 | 5.46 | 67071994  | 0.07 | 0.45  | 0.06 | 3 |
| DTA | 115 | 4 | 121388766 | 124395081 | Low_rec  | 5 | 5.79 | 52 | 5.83 | 6 | 5.83 | 122321775 | 0.08 | -0.63 | 0.22 | 4 |
| DTA | 116 | 4 | 141833004 | 143441400 | Low_rec  | 0 | -    | 1  | 5.56 | 0 | -    | 142637202 | 0.08 | -0.67 | 0.18 | 1 |
| DTA | 117 | 4 | 159960996 | 159995881 | High_rec | 0 | -    | 0  | -    | 1 | 5.12 | 159978445 | 0.07 | 0.59  | 0.47 | 1 |
| DTA | 118 | 4 | 172985441 | 173011617 | High_rec | 0 | -    | 1  | 5.25 | 0 | -    | 172998530 | 0.07 | -0.56 | 0.26 | 1 |
| DTA | 119 | 4 | 173169703 | 173195803 | High_rec | 0 | -    | 1  | 5.27 | 0 | -    | 173182750 | 0.07 | -0.58 | 0.26 | 1 |
| DTA | 120 | 4 | 188849307 | 188905965 | High_rec | 0 | -    | 0  | -    | 1 | 5.04 | 188877625 | 0.07 | 0.55  | 0.39 | 1 |
| DTA | 121 | 4 | 189008476 | 189071538 | High_rec | 0 | -    | 3  | 5.78 | 2 | 5.51 | 189042368 | 0.08 | 0.59  | 0.39 | 1 |
| DTA | 122 | 5 | 3082687   | 3099609   | High_rec | 0 | -    | 0  | -    | 1 | 5    | 3091106   | 0.07 | -0.85 | 0.38 | 1 |
| DTA | 123 | 5 | 4495760   | 4525458   | High_rec | 0 | -    | 1  | 5.02 | 2 | 5.25 | 4508247   | 0.08 | 0.95  | 0.43 | 1 |
| DTA | 124 | 5 | 4569851   | 4598515   | High_rec | 0 | -    | 1  | 5.48 | 1 | 5.15 | 4578531   | 0.08 | 0.93  | 0.49 | 3 |
| DTA | 125 | 5 | 4656747   | 4674525   | High_rec | 0 | -    | 0  | -    | 1 | 6.34 | 4665429   | 0.09 | -0.95 | 0.33 | 2 |
| DTA | 126 | 5 | 5094316   | 5112489   | High_rec | 0 | -    | 0  | -    | 1 | 5.18 | 5103359   | 0.08 | 0.92  | 0.34 | 1 |
| DTA | 127 | 5 | 5374176   | 5392671   | High_rec | 0 | -    | 1  | 6.32 | 0 | -    | 5383554   | 0.09 | -0.62 | 0.36 | 1 |
| DTA | 128 | 5 | 11350227  | 11377461  | High_rec | 0 | -    | 0  | -    | 1 | 5.08 | 11363780  | 0.07 | 0.31  | 0.11 | 1 |
| DTA | 129 | 5 | 14837366  | 14871232  | High_rec | 0 | -    | 1  | 5.13 | 1 | 5.8  | 14854900  | 0.08 | 0.51  | 0.39 | 1 |
| DTA | 130 | 5 | 17664790  | 17707101  | High_rec | 0 | -    | 0  | -    | 4 | 5.69 | 17685917  | 0.08 | -0.91 | 0.46 | 1 |
| DTA | 131 | 5 | 17840141  | 17883206  | High_rec | 0 | -    | 1  | 5.6  | 0 | -    | 17861628  | 0.08 | -0.77 | 0.48 | 2 |
| DTA | 132 | 5 | 22591847  | 22668642  | High_rec | 0 | -    | 0  | -    | 1 | 5.19 | 22630122  | 0.07 | 0.42  | 0.05 | 1 |
| DTA | 133 | 5 | 37284402  | 38924217  | Low_rec  | 0 | -    | 1  | 5.75 | 2 | 5.16 | 37940203  | 0.08 | -0.79 | 0.17 | 1 |

Additional\_File8\_TableS3\_QTLs\_Summary\_DTA

|     |     |   |           |           |                  |   |      |   |      |   |      |           |      |       |      |   |
|-----|-----|---|-----------|-----------|------------------|---|------|---|------|---|------|-----------|------|-------|------|---|
| DTA | 134 | 5 | 54117938  | 54242622  | High_rec         | 0 | -    | 1 | 5.13 | 1 | 5.15 | 54186562  | 0.07 | -0.35 | 0.3  | 1 |
| DTA | 135 | 5 | 54361826  | 54473275  | High_rec         | 0 | -    | 1 | 5.13 | 0 | -    | 54417598  | 0.07 | -0.32 | 0.21 | 1 |
| DTA | 136 | 5 | 68669652  | 70089199  | Low_rec          | 1 | 5    | 4 | 5.42 | 0 | -    | 69431886  | 0.08 | -0.7  | 0.19 | 1 |
| DTA | 137 | 5 | 71957565  | 73269167  | Low_rec          | 0 | -    | 1 | 5.05 | 0 | -    | 72613366  | 0.07 | -0.65 | 0.11 | 1 |
| DTA | 138 | 5 | 80180536  | 81492138  | Low_rec          | 0 | -    | 1 | 5.93 | 0 | -    | 80836337  | 0.08 | 0.55  | 0.2  | 1 |
| DTA | 139 | 5 | 86755980  | 88067582  | Low_rec          | 0 | -    | 0 | -    | 1 | 5.27 | 87411781  | 0.07 | 0.35  | 0.17 | 1 |
| DTA | 140 | 5 | 140412491 | 141724093 | Low_rec          | 0 | -    | 1 | 5.56 | 0 | -    | 141068292 | 0.07 | 0.34  | 0.19 | 1 |
| DTA | 141 | 5 | 146510325 | 148940863 | Low_rec          | 2 | 5.76 | 7 | 5.73 | 3 | 5.89 | 147877194 | 0.08 | -0.69 | 0.44 | 4 |
| DTA | 142 | 5 | 150834223 | 152145825 | Low_rec          | 0 | -    | 1 | 5.01 | 0 | -    | 151490024 | 0.07 | -0.58 | 0.34 | 1 |
| DTA | 143 | 5 | 156886729 | 158306029 | Low_rec/High_rec | 1 | 5.19 | 4 | 6.44 | 0 | -    | 158226773 | 0.09 | 0.37  | 0.22 | 6 |
| DTA | 144 | 5 | 158320476 | 158438641 | High_rec         | 0 | -    | 1 | 5.47 | 0 | -    | 158379808 | 0.07 | 0.34  | 0.34 | 1 |
| DTA | 145 | 5 | 160613723 | 160701625 | High_rec         | 0 | -    | 1 | 6.24 | 0 | -    | 160657801 | 0.09 | 0.79  | 0.22 | 3 |
| DTA | 146 | 5 | 161156358 | 161238645 | High_rec         | 0 | -    | 0 | -    | 1 | 5.4  | 161197606 | 0.08 | 0.74  | 0.26 | 1 |
| DTA | 147 | 5 | 161240041 | 161321951 | High_rec         | 1 | 6.18 | 1 | 5.2  | 0 | -    | 161281322 | 0.09 | 0.81  | 0.28 | 2 |
| DTA | 148 | 5 | 161355081 | 161435460 | High_rec         | 0 | -    | 1 | 5.2  | 0 | -    | 161395372 | 0.07 | 0.73  | 0.27 | 1 |
| DTA | 149 | 5 | 162721460 | 162790352 | High_rec         | 0 | -    | 0 | -    | 2 | 5.57 | 162755964 | 0.08 | 0.52  | 0.36 | 1 |
| DTA | 150 | 5 | 162812372 | 162943024 | High_rec         | 0 | -    | 7 | 6.2  | 1 | 5.41 | 162909205 | 0.09 | 0.57  | 0.18 | 2 |
| DTA | 151 | 5 | 163079614 | 163145943 | High_rec         | 0 | -    | 1 | 5.9  | 0 | -    | 163112850 | 0.08 | 0.57  | 0.18 | 1 |
| DTA | 152 | 5 | 163380177 | 163444504 | High_rec         | 0 | -    | 1 | 5.02 | 0 | -    | 163412392 | 0.07 | 0.52  | 0.19 | 1 |
| DTA | 153 | 5 | 165130736 | 165185477 | High_rec         | 0 | -    | 1 | 5.91 | 0 | -    | 165158154 | 0.08 | 0.5   | 0.17 | 1 |
| DTA | 154 | 5 | 165199335 | 165254222 | High_rec         | 0 | -    | 2 | 5.96 | 0 | -    | 165226594 | 0.08 | 0.5   | 0.17 | 1 |
| DTA | 155 | 5 | 170143051 | 170185331 | High_rec         | 0 | -    | 0 | -    | 1 | 5.6  | 170164180 | 0.08 | 0.49  | 0.29 | 2 |
| DTA | 156 | 5 | 172551193 | 172601400 | High_rec         | 0 | -    | 5 | 5.01 | 0 | -    | 172571872 | 0.07 | -0.65 | 0.16 | 1 |
| DTA | 157 | 5 | 174913840 | 174955811 | High_rec         | 0 | -    | 0 | -    | 1 | 5.18 | 174934825 | 0.07 | 0.42  | 0.07 | 1 |
| DTA | 158 | 5 | 175584879 | 175627480 | High_rec         | 0 | -    | 0 | -    | 2 | 5.39 | 175606231 | 0.07 | -0.45 | 0.47 | 1 |
| DTA | 159 | 5 | 183654310 | 183712645 | High_rec         | 0 | -    | 1 | 5.03 | 0 | -    | 183683475 | 0.07 | 0.84  | 0.19 | 1 |
| DTA | 160 | 5 | 184402325 | 184460084 | High_rec         | 0 | -    | 0 | -    | 1 | 5.28 | 184431216 | 0.07 | 0.69  | 0.15 | 1 |
| DTA | 161 | 5 | 186226655 | 186310811 | High_rec         | 0 | -    | 0 | -    | 5 | 5.8  | 186283527 | 0.08 | 0.51  | 0.2  | 1 |
| DTA | 162 | 5 | 186356043 | 186441038 | High_rec         | 0 | -    | 1 | 5.28 | 4 | 5.72 | 186413892 | 0.08 | 0.51  | 0.2  | 1 |
| DTA | 163 | 5 | 186494920 | 186549003 | High_rec         | 0 | -    | 1 | 5.11 | 0 | -    | 186521967 | 0.07 | 0.46  | 0.24 | 1 |
| DTA | 164 | 5 | 188438941 | 188490894 | High_rec         | 0 | -    | 1 | 6.83 | 2 | 5.59 | 188463898 | 0.1  | 0.84  | 0.19 | 2 |
| DTA | 165 | 5 | 197851254 | 197887928 | High_rec         | 0 | -    | 0 | -    | 3 | 5.2  | 197869628 | 0.07 | 0.62  | 0.12 | 1 |
| DTA | 166 | 5 | 198699320 | 198733049 | High_rec         | 0 | -    | 0 | -    | 1 | 5.65 | 198716239 | 0.08 | 1.02  | 0.08 | 2 |
| DTA | 167 | 5 | 200815469 | 200842418 | High_rec         | 0 | -    | 1 | 5.4  | 0 | -    | 200828955 | 0.08 | 0.58  | 0.3  | 1 |

Additional\_File8\_TableS3\_QTLs\_Summary\_DTA

|     |     |   |           |           |          |   |      |   |      |   |      |           |      |       |      |   |
|-----|-----|---|-----------|-----------|----------|---|------|---|------|---|------|-----------|------|-------|------|---|
| DTA | 168 | 5 | 205775773 | 205798691 | High_rec | 0 | -    | 2 | 6.25 | 1 | 5.99 | 205789631 | 0.09 | -0.69 | 0.11 | 1 |
| DTA | 169 | 6 | 12761980  | 13615092  | Low_rec  | 0 | -    | 1 | 5.13 | 0 | -    | 13188536  | 0.07 | 0.68  | 0.16 | 1 |
| DTA | 170 | 6 | 18102265  | 18955377  | Low_rec  | 0 | -    | 0 | -    | 1 | 5.26 | 18528821  | 0.08 | -0.78 | 0.23 | 1 |
| DTA | 171 | 6 | 29213757  | 30066869  | Low_rec  | 0 | -    | 1 | 5.21 | 0 | -    | 29640313  | 0.07 | 0.31  | 0.1  | 1 |
| DTA | 172 | 6 | 37660245  | 38693955  | Low_rec  | 0 | -    | 2 | 5.17 | 1 | 5.11 | 38267399  | 0.07 | -0.67 | 0.5  | 1 |
| DTA | 173 | 6 | 109058831 | 109087367 | High_rec | 0 | -    | 0 | -    | 1 | 5.27 | 109073088 | 0.07 | -0.56 | 0.06 | 1 |
| DTA | 174 | 6 | 141662089 | 142515201 | Low_rec  | 0 | -    | 1 | 5.2  | 0 | -    | 142088645 | 0.07 | -0.82 | 0.27 | 1 |
| DTA | 175 | 6 | 151735067 | 151756870 | High_rec | 0 | -    | 1 | 5.79 | 0 | -    | 151745930 | 0.08 | -0.68 | 0.06 | 1 |
| DTA | 176 | 6 | 151777796 | 151799425 | High_rec | 0 | -    | 1 | 6.06 | 0 | -    | 151788575 | 0.09 | -0.69 | 0.06 | 1 |
| DTA | 177 | 6 | 158184986 | 158197625 | High_rec | 0 | -    | 1 | 6.11 | 0 | -    | 158191338 | 0.09 | -0.76 | 0.27 | 1 |
| DTA | 178 | 6 | 159377325 | 159389293 | High_rec | 0 | -    | 1 | 5.66 | 0 | -    | 159383237 | 0.08 | -0.69 | 0.07 | 1 |
| DTA | 179 | 7 | 1282763   | 1289429   | High_rec | 0 | -    | 0 | -    | 2 | 5.56 | 1286039   | 0.08 | 0.54  | 0.4  | 1 |
| DTA | 180 | 7 | 1313672   | 1320308   | High_rec | 0 | -    | 0 | -    | 1 | 5.69 | 1316938   | 0.08 | -0.89 | 0.43 | 1 |
| DTA | 181 | 7 | 65201021  | 66299985  | Low_rec  | 0 | -    | 0 | -    | 1 | 5.02 | 65750503  | 0.07 | -0.54 | 0.32 | 1 |
| DTA | 182 | 7 | 69352112  | 70451076  | Low_rec  | 0 | -    | 0 | -    | 1 | 5.07 | 69901594  | 0.07 | 0.54  | 0.12 | 1 |
| DTA | 183 | 7 | 73156241  | 74255205  | Low_rec  | 0 | -    | 0 | -    | 1 | 5.05 | 73705723  | 0.07 | 0.53  | 0.11 | 1 |
| DTA | 184 | 7 | 74588199  | 76039025  | Low_rec  | 0 | -    | 0 | -    | 2 | 5.51 | 75489543  | 0.08 | 0.55  | 0.12 | 1 |
| DTA | 185 | 7 | 100254904 | 101353868 | Low_rec  | 0 | -    | 1 | 5.11 | 0 | -    | 100804386 | 0.07 | 0.59  | 0.13 | 1 |
| DTA | 186 | 7 | 123746329 | 123762688 | High_rec | 0 | -    | 2 | 6    | 0 | -    | 123753625 | 0.08 | 0.56  | 0.29 | 2 |
| DTA | 187 | 7 | 123872649 | 123888212 | High_rec | 1 | 5.96 | 2 | 6.1  | 2 | 6.26 | 123880597 | 0.09 | 0.57  | 0.29 | 2 |
| DTA | 188 | 7 | 124114738 | 124153517 | High_rec | 0 | -    | 3 | 6.51 | 2 | 7.29 | 124146487 | 0.1  | 0.6   | 0.3  | 1 |
| DTA | 189 | 7 | 124211722 | 124226031 | High_rec | 0 | -    | 2 | 5.98 | 0 | -    | 124218688 | 0.08 | 0.54  | 0.27 | 4 |
| DTA | 190 | 7 | 125375104 | 125388088 | High_rec | 0 | -    | 0 | -    | 3 | 5.18 | 125381612 | 0.07 | 0.47  | 0.15 | 1 |
| DTA | 191 | 7 | 125855347 | 125868050 | High_rec | 0 | -    | 1 | 5.08 | 0 | -    | 125861690 | 0.07 | -0.59 | 0.27 | 1 |
| DTA | 192 | 7 | 126292920 | 126305440 | High_rec | 0 | -    | 1 | 5.25 | 0 | -    | 126299177 | 0.07 | 0.47  | 0.18 | 1 |
| DTA | 193 | 7 | 126334859 | 126354652 | High_rec | 0 | -    | 1 | 5.02 | 1 | 5.05 | 126341107 | 0.07 | 0.45  | 0.16 | 1 |
| DTA | 194 | 7 | 126905782 | 126918117 | High_rec | 1 | 5.32 | 0 | -    | 0 | -    | 126911957 | 0.07 | -0.6  | 0.41 | 1 |
| DTA | 195 | 7 | 127139372 | 127151654 | High_rec | 0 | -    | 0 | -    | 1 | 5.02 | 127145524 | 0.07 | -0.81 | 0.49 | 1 |
| DTA | 196 | 7 | 127207019 | 127219286 | High_rec | 0 | -    | 1 | 5.21 | 0 | -    | 127213162 | 0.08 | -0.98 | 0.34 | 1 |
| DTA | 197 | 7 | 131105710 | 131117647 | High_rec | 0 | -    | 0 | -    | 1 | 5.12 | 131111686 | 0.07 | 0.66  | 0.09 | 1 |
| DTA | 198 | 7 | 164032441 | 164041201 | High_rec | 0 | -    | 1 | 6.51 | 0 | -    | 164036829 | 0.09 | 0.73  | 0.27 | 3 |
| DTA | 199 | 7 | 167807984 | 167814666 | High_rec | 0 | -    | 0 | -    | 1 | 5.18 | 167811322 | 0.07 | 0.83  | 0.49 | 1 |
| DTA | 200 | 7 | 169443032 | 169449312 | High_rec | 0 | -    | 0 | -    | 1 | 5.32 | 169446169 | 0.07 | 0.53  | 0.25 | 1 |
| DTA | 201 | 7 | 171568180 | 171574155 | High_rec | 0 | -    | 0 | -    | 1 | 5.84 | 171571166 | 0.08 | -0.52 | 0.34 | 1 |

Additional\_File8\_TableS3\_QTLs\_Summary\_DTA

|     |     |    |           |           |          |   |   |   |      |   |      |           |      |       |      |   |
|-----|-----|----|-----------|-----------|----------|---|---|---|------|---|------|-----------|------|-------|------|---|
| DTA | 202 | 7  | 171579249 | 171585224 | High_rec | 0 | - | 0 | -    | 1 | 5.26 | 171582235 | 0.07 | 0.52  | 0.46 | 1 |
| DTA | 203 | 7  | 171786321 | 171792276 | High_rec | 0 | - | 0 | -    | 1 | 7.16 | 171789302 | 0.1  | 0.56  | 0.18 | 1 |
| DTA | 204 | 7  | 172199987 | 172205910 | High_rec | 0 | - | 1 | 5.01 | 0 | -    | 172202953 | 0.07 | 0.48  | 0.19 | 1 |
| DTA | 205 | 8  | 3914688   | 3940833   | High_rec | 0 | - | 0 | -    | 2 | 5.1  | 3927670   | 0.07 | 0.54  | 0.35 | 1 |
| DTA | 206 | 8  | 3959663   | 3985862   | High_rec | 0 | - | 1 | 5.14 | 0 | -    | 3972674   | 0.07 | 0.49  | 0.15 | 1 |
| DTA | 207 | 8  | 103135614 | 103314337 | High_rec | 0 | - | 9 | 5.66 | 0 | -    | 103196289 | 0.08 | -0.64 | 0.34 | 1 |
| DTA | 208 | 8  | 114724996 | 114841146 | High_rec | 0 | - | 8 | 5.3  | 0 | -    | 114744929 | 0.07 | -0.68 | 0.14 | 1 |
| DTA | 209 | 8  | 114999636 | 115039255 | High_rec | 0 | - | 0 | -    | 1 | 5.39 | 115019438 | 0.08 | -0.69 | 0.14 | 1 |
| DTA | 210 | 8  | 122682786 | 122717340 | High_rec | 0 | - | 3 | 6.34 | 0 | -    | 122700074 | 0.09 | -0.75 | 0.3  | 1 |
| DTA | 211 | 8  | 159472811 | 159526274 | High_rec | 0 | - | 4 | 5.07 | 0 | -    | 159498761 | 0.06 | -0.32 | 0.19 | 1 |
| DTA | 212 | 8  | 160076474 | 160126398 | High_rec | 0 | - | 6 | 5.43 | 0 | -    | 160101868 | 0.07 | -0.43 | 0.24 | 1 |
| DTA | 213 | 8  | 160184590 | 160231960 | High_rec | 0 | - | 0 | -    | 2 | 5.21 | 160208305 | 0.07 | -0.56 | 0.28 | 1 |
| DTA | 214 | 8  | 165540531 | 165566125 | High_rec | 0 | - | 0 | -    | 1 | 5.02 | 165553343 | 0.07 | 0.49  | 0.18 | 1 |
| DTA | 215 | 9  | 14147158  | 14164754  | High_rec | 0 | - | 0 | -    | 1 | 5.06 | 14155952  | 0.07 | 0.6   | 0.09 | 1 |
| DTA | 216 | 9  | 15605252  | 15623873  | High_rec | 0 | - | 1 | 5.24 | 0 | -    | 15614554  | 0.07 | 0.45  | 0.49 | 1 |
| DTA | 217 | 9  | 126570659 | 128364711 | Low_rec  | 0 | - | 0 | -    | 1 | 5.08 | 127467685 | 0.07 | 0.93  | 0.18 | 1 |
| DTA | 218 | 9  | 151482945 | 151504578 | High_rec | 0 | - | 1 | 5.51 | 2 | 5.56 | 151490165 | 0.07 | -0.32 | 0.36 | 1 |
| DTA | 219 | 9  | 151556530 | 151572839 | High_rec | 0 | - | 7 | 5.69 | 0 | -    | 151567191 | 0.08 | -0.53 | 0.28 | 2 |
| DTA | 220 | 10 | 2774011   | 2782214   | High_rec | 0 | - | 0 | -    | 1 | 5.06 | 2778123   | 0.07 | 0.71  | 0.15 | 1 |
| DTA | 221 | 10 | 5891339   | 5901798   | High_rec | 0 | - | 0 | -    | 1 | 5.06 | 5896553   | 0.07 | -0.54 | 0.06 | 1 |
| DTA | 222 | 10 | 5944354   | 5954890   | High_rec | 0 | - | 1 | 5.43 | 0 | -    | 5949618   | 0.08 | -0.55 | 0.12 | 1 |
| DTA | 223 | 10 | 6061081   | 6071795   | High_rec | 0 | - | 0 | -    | 2 | 5.26 | 6066456   | 0.07 | -0.76 | 0.08 | 1 |
| DTA | 224 | 10 | 7464675   | 7477951   | High_rec | 0 | - | 1 | 5.28 | 0 | -    | 7471332   | 0.07 | 0.53  | 0.19 | 1 |
| DTA | 225 | 10 | 126789598 | 128432832 | Low_rec  | 0 | - | 0 | -    | 1 | 5.14 | 127611215 | 0.07 | 0.64  | 0.05 | 1 |
| DTA | 226 | 10 | 128530205 | 128599834 | High_rec | 0 | - | 3 | 5.3  | 0 | -    | 128563457 | 0.08 | -0.88 | 0.41 | 1 |

plantHT

| QTLs Summary plant height trait |     |     |            |            |          |         |                 |          |                  |          |                  |           |          |           |      |           |
|---------------------------------|-----|-----|------------|------------|----------|---------|-----------------|----------|------------------|----------|------------------|-----------|----------|-----------|------|-----------|
| Trait                           | QTL | Chr | LowerLimit | UpperLimit | Rec      | NbSNP50 | LogPva<br>Max50 | NbSNP600 | LogPva<br>Max600 | NbSNPGBS | LogPva<br>MaxGBS | PosMax    | R2_LDMax | EffectMax | MAF  | NbDiffEnv |
| plantHT                         | 1   | 1   | 5321759    | 5376047    | High_rec | 0       | -               | 2        | 6.81             | 0        | -                | 5349023   | 0.11     | 4.2       | 0.13 | 1         |
| plantHT                         | 2   | 1   | 9034969    | 9085097    | High_rec | 1       | 5.01            | 0        | -                | 0        | -                | 9060038   | 0.08     | 2.77      | 0.18 | 1         |
| plantHT                         | 3   | 1   | 9095034    | 9146531    | High_rec | 0       | -               | 2        | 5.6              | 0        | -                | 9120069   | 0.09     | 3         | 0.16 | 1         |
| plantHT                         | 4   | 1   | 17483847   | 17536946   | High_rec | 0       | -               | 1        | 5.07             | 0        | -                | 17510348  | 0.08     | 3.11      | 0.45 | 1         |
| plantHT                         | 5   | 1   | 27076669   | 27178570   | High_rec | 0       | -               | 1        | 5.87             | 0        | -                | 27127547  | 0.09     | 3.25      | 0.37 | 1         |
| plantHT                         | 6   | 1   | 38536030   | 39163088   | Low_rec  | 1       | 5.43            | 1        | 5.38             | 0        | -                | 38849559  | 0.08     | 2.25      | 0.25 | 1         |
| plantHT                         | 7   | 1   | 95692404   | 95825908   | High_rec | 0       | -               | 1        | 5.18             | 0        | -                | 95759037  | 0.08     | 3.28      | 0.16 | 1         |
| plantHT                         | 8   | 1   | 119187876  | 119814934  | Low_rec  | 0       | -               | 1        | 7.51             | 0        | -                | 119501405 | 0.12     | -4.71     | 0.27 | 2         |
| plantHT                         | 9   | 1   | 180336978  | 180472831  | High_rec | 0       | -               | 2        | 5.56             | 0        | -                | 180406172 | 0.09     | 3.06      | 0.1  | 1         |
| plantHT                         | 10  | 1   | 207399559  | 207533511  | High_rec | 0       | -               | 0        | -                | 1        | 5.16             | 207466601 | 0.08     | 2.72      | 0.1  | 1         |
| plantHT                         | 11  | 1   | 216635254  | 216732196  | High_rec | 0       | -               | 0        | -                | 2        | 5.74             | 216684746 | 0.09     | -3.18     | 0.06 | 1         |
| plantHT                         | 12  | 1   | 255221989  | 255427501  | High_rec | 0       | -               | 0        | -                | 1        | 5.12             | 255324940 | 0.09     | 3.97      | 0.14 | 1         |
| plantHT                         | 13  | 1   | 255600524  | 255813191  | High_rec | 0       | -               | 0        | -                | 2        | 5.37             | 255702081 | 0.09     | 4.07      | 0.1  | 1         |
| plantHT                         | 14  | 1   | 271242121  | 271388144  | High_rec | 0       | -               | 0        | -                | 1        | 5.58             | 271315169 | 0.09     | -2.97     | 0.08 | 1         |
| plantHT                         | 15  | 1   | 286370234  | 286546039  | High_rec | 0       | -               | 1        | 5.05             | 3        | 6.09             | 286404666 | 0.1      | 3.27      | 0.3  | 2         |
| plantHT                         | 16  | 1   | 295403633  | 295469508  | High_rec | 0       | -               | 0        | -                | 2        | 5.4              | 295436643 | 0.06     | 3.8       | 0.31 | 2         |
| plantHT                         | 17  | 2   | 12620810   | 12638329   | High_rec | 0       | -               | 0        | -                | 1        | 5.26             | 12629574  | 0.09     | 4.06      | 0.19 | 1         |
| plantHT                         | 18  | 2   | 23853996   | 23901562   | High_rec | 0       | -               | 0        | -                | 1        | 5.62             | 23877737  | 0.09     | -3.69     | 0.36 | 1         |
| plantHT                         | 19  | 2   | 39258562   | 39355383   | High_rec | 1       | 5.7             | 3        | 5.68             | 0        | -                | 39315566  | 0.09     | 3.51      | 0.36 | 2         |
| plantHT                         | 20  | 2   | 60331863   | 61383720   | Low_rec  | 0       | -               | 1        | 5.5              | 3        | 5.36             | 60802164  | 0.09     | -3.24     | 0.15 | 2         |
| plantHT                         | 21  | 2   | 129971437  | 130912039  | Low_rec  | 0       | -               | 1        | 9.21             | 0        | -                | 130441738 | 0.15     | -6.74     | 0.14 | 3         |
| plantHT                         | 22  | 2   | 177255432  | 177286081  | High_rec | 0       | -               | 1        | 5.28             | 0        | -                | 177270751 | 0.08     | 2.86      | 0.34 | 1         |
| plantHT                         | 23  | 2   | 206908493  | 207849099  | Low_rec  | 0       | -               | 0        | -                | 3        | 5.66             | 207378798 | 0.09     | 2.69      | 0.38 | 1         |
| plantHT                         | 24  | 2   | 232369190  | 232394645  | High_rec | 0       | -               | 1        | 5.06             | 0        | -                | 232381918 | 0.08     | -2.77     | 0.2  | 1         |
| plantHT                         | 25  | 3   | 2101949    | 2118765    | High_rec | 0       | -               | 2        | 5.39             | 0        | -                | 2110438   | 0.09     | 3.19      | 0.2  | 1         |
| plantHT                         | 26  | 3   | 14663772   | 14707215   | High_rec | 0       | -               | 1        | 5.17             | 3        | 5.45             | 14685414  | 0.09     | -3.08     | 0.25 | 1         |
| plantHT                         | 27  | 3   | 14785908   | 14830279   | High_rec | 0       | -               | 1        | 5.02             | 0        | -                | 14807997  | 0.08     | -2.95     | 0.23 | 1         |
| plantHT                         | 28  | 3   | 14834169   | 14878926   | High_rec | 0       | -               | 0        | -                | 1        | 5.79             | 14856457  | 0.09     | -3.17     | 0.24 | 1         |
| plantHT                         | 29  | 3   | 28659805   | 30394938   | Low_rec  | 0       | -               | 3        | 5.08             | 0        | -                | 29514189  | 0.08     | 2.6       | 0.09 | 1         |
| plantHT                         | 30  | 3   | 158943646  | 159005555  | High_rec | 0       | -               | 2        | 6.54             | 0        | -                | 158974594 | 0.11     | 4.66      | 0.4  | 1         |
| plantHT                         | 31  | 3   | 170004714  | 170039638  | High_rec | 0       | -               | 1        | 5.19             | 0        | -                | 170022188 | 0.08     | 3.11      | 0.37 | 1         |

plantHT

|         |    |   |           |           |          |   |     |   |      |    |      |           |      |       |      |   |
|---------|----|---|-----------|-----------|----------|---|-----|---|------|----|------|-----------|------|-------|------|---|
| plantHT | 32 | 3 | 172426304 | 172459479 | High_rec | 0 | -   | 0 | -    | 1  | 5.94 | 172442890 | 0.1  | 2.99  | 0.32 | 1 |
| plantHT | 33 | 3 | 176441161 | 176473083 | High_rec | 0 | -   | 0 | -    | 1  | 5.51 | 176457119 | 0.09 | 3.66  | 0.18 | 1 |
| plantHT | 34 | 3 | 207123467 | 207167995 | High_rec | 0 | -   | 1 | 7.53 | 0  | -    | 207145740 | 0.08 | 3.13  | 0.22 | 1 |
| plantHT | 35 | 3 | 217802939 | 217838333 | High_rec | 0 | -   | 0 | -    | 1  | 5    | 217820647 | 0.08 | 3.08  | 0.46 | 1 |
| plantHT | 36 | 4 | 50492621  | 52101017  | Low_rec  | 0 | -   | 1 | 6.26 | 0  | -    | 51296819  | 0.1  | -5.62 | 0.15 | 1 |
| plantHT | 37 | 4 | 124723660 | 126332056 | Low_rec  | 0 | -   | 0 | -    | 1  | 5.25 | 125527858 | 0.09 | -3.33 | 0.09 | 1 |
| plantHT | 38 | 4 | 149858102 | 149935074 | High_rec | 0 | -   | 0 | -    | 3  | 5.86 | 149896482 | 0.1  | -3.79 | 0.07 | 1 |
| plantHT | 39 | 4 | 167175978 | 167204928 | High_rec | 0 | -   | 0 | -    | 1  | 5.32 | 167190461 | 0.09 | -5.41 | 0.09 | 1 |
| plantHT | 40 | 4 | 167301170 | 167330065 | High_rec | 0 | -   | 0 | -    | 1  | 5.45 | 167315625 | 0.09 | -5.53 | 0.14 | 1 |
| plantHT | 41 | 4 | 172980811 | 173008781 | High_rec | 0 | -   | 3 | 5.38 | 0  | -    | 172993901 | 0.09 | -3.98 | 0.2  | 1 |
| plantHT | 42 | 4 | 217486859 | 219095255 | Low_rec  | 0 | -   | 1 | 5.43 | 0  | -    | 218291057 | 0.09 | 5.24  | 0.41 | 1 |
| plantHT | 43 | 4 | 227024105 | 227058966 | High_rec | 0 | -   | 0 | -    | 1  | 5    | 227041471 | 0.08 | -2.53 | 0.08 | 1 |
| plantHT | 44 | 4 | 235200478 | 235218312 | High_rec | 0 | -   | 1 | 5.01 | 0  | -    | 235209415 | 0.08 | 2.69  | 0.2  | 1 |
| plantHT | 45 | 5 | 5425496   | 5444529   | High_rec | 0 | -   | 1 | 5.94 | 2  | 5.07 | 5434931   | 0.09 | -3.37 | 0.22 | 1 |
| plantHT | 46 | 5 | 5770887   | 5789922   | High_rec | 0 | -   | 0 | -    | 1  | 5.2  | 5780589   | 0.09 | -3.29 | 0.38 | 1 |
| plantHT | 47 | 5 | 6424559   | 6444665   | High_rec | 0 | -   | 0 | -    | 1  | 5.99 | 6434451   | 0.1  | -3.56 | 0.49 | 1 |
| plantHT | 48 | 5 | 17172121  | 17212311  | High_rec | 0 | -   | 0 | -    | 1  | 5.5  | 17192201  | 0.09 | -3.92 | 0.11 | 1 |
| plantHT | 49 | 5 | 17246847  | 17287342  | High_rec | 0 | -   | 1 | 5.41 | 0  | -    | 17267084  | 0.09 | -3.72 | 0.18 | 1 |
| plantHT | 50 | 5 | 17475698  | 17518041  | High_rec | 0 | -   | 3 | 5.03 | 0  | -    | 17496416  | 0.08 | -2.85 | 0.08 | 1 |
| plantHT | 51 | 5 | 29118568  | 30430170  | Low_rec  | 0 | -   | 1 | 5.01 | 0  | -    | 29774369  | 0.08 | 2.41  | 0.1  | 1 |
| plantHT | 52 | 5 | 54172315  | 54284393  | High_rec | 0 | -   | 0 | -    | 1  | 5.52 | 54228403  | 0.09 | 3.93  | 0.22 | 1 |
| plantHT | 53 | 5 | 60082722  | 60180810  | High_rec | 1 | 5.7 | 1 | 5.12 | 0  | -    | 60131782  | 0.09 | 3.33  | 0.09 | 1 |
| plantHT | 54 | 5 | 96329805  | 99474044  | Low_rec  | 0 | -   | 4 | 6.39 | 13 | 5.67 | 97193833  | 0.11 | -3.77 | 0.19 | 1 |
| plantHT | 55 | 5 | 127075524 | 128387126 | Low_rec  | 0 | -   | 1 | 5.06 | 0  | -    | 127731325 | 0.08 | 2.97  | 0.1  | 1 |
| plantHT | 56 | 5 | 134619433 | 136278342 | Low_rec  | 0 | -   | 8 | 5.24 | 1  | 5.22 | 135275234 | 0.08 | 3.12  | 0.06 | 1 |
| plantHT | 57 | 5 | 139101020 | 140416300 | Low_rec  | 0 | -   | 2 | 5.02 | 0  | -    | 139756821 | 0.09 | 5.21  | 0.09 | 1 |
| plantHT | 58 | 5 | 169558197 | 169601045 | High_rec | 0 | -   | 0 | -    | 1  | 5.1  | 169579634 | 0.08 | 2.97  | 0.16 | 1 |
| plantHT | 59 | 5 | 189457709 | 189505795 | High_rec | 0 | -   | 1 | 5.47 | 0  | -    | 189481782 | 0.09 | -4.06 | 0.46 | 1 |
| plantHT | 60 | 5 | 200814660 | 200841611 | High_rec | 0 | -   | 1 | 5.63 | 0  | -    | 200828147 | 0.08 | -5.44 | 0.27 | 1 |
| plantHT | 61 | 5 | 203386730 | 203408165 | High_rec | 0 | -   | 0 | -    | 1  | 5.35 | 203397438 | 0.09 | -3.96 | 0.13 | 1 |
| plantHT | 62 | 5 | 206591797 | 206609076 | High_rec | 0 | -   | 1 | 5.5  | 0  | -    | 206600443 | 0.09 | 4     | 0.26 | 1 |
| plantHT | 63 | 5 | 215466106 | 215489878 | High_rec | 0 | -   | 0 | -    | 2  | 5.93 | 215472581 | 0.1  | 3.68  | 0.1  | 1 |
| plantHT | 64 | 5 | 216078616 | 216091545 | High_rec | 0 | -   | 0 | -    | 1  | 5.36 | 216085094 | 0.09 | 3.46  | 0.09 | 1 |
| plantHT | 65 | 6 | 97968     | 144094    | High_rec | 0 | -   | 1 | 5.46 | 0  | -    | 121052    | 0.09 | -5.32 | 0.08 | 1 |

plantHT

|         |    |   |           |           |          |    |       |     |       |    |       |           |      |       |      |   |
|---------|----|---|-----------|-----------|----------|----|-------|-----|-------|----|-------|-----------|------|-------|------|---|
| plantHT | 66 | 6 | 340490    | 386662    | High_rec | 0  | -     | 0   | -     | 1  | 5.34  | 363667    | 0.09 | -5.51 | 0.46 | 1 |
| plantHT | 67 | 6 | 4424152   | 4453661   | High_rec | 0  | -     | 0   | -     | 1  | 5.16  | 4438854   | 0.08 | 3.43  | 0.06 | 1 |
| plantHT | 68 | 6 | 5140249   | 5170672   | High_rec | 1  | 5.07  | 1   | 5     | 0  | -     | 5155708   | 0.09 | -5.47 | 0.42 | 1 |
| plantHT | 69 | 6 | 5531855   | 5563284   | High_rec | 0  | -     | 2   | 5.18  | 0  | -     | 5544716   | 0.09 | -5.19 | 0.19 | 1 |
| plantHT | 70 | 6 | 5623945   | 5659803   | High_rec | 0  | -     | 1   | 5.29  | 4  | 6.01  | 5638516   | 0.1  | -5.93 | 0.23 | 1 |
| plantHT | 71 | 6 | 6593785   | 6636807   | High_rec | 0  | -     | 7   | 8.39  | 1  | 6.13  | 6614012   | 0.13 | -4.76 | 0.18 | 2 |
| plantHT | 72 | 6 | 6793841   | 6837747   | High_rec | 0  | -     | 12  | 8.77  | 0  | -     | 6807230   | 0.14 | -4.87 | 0.18 | 2 |
| plantHT | 73 | 6 | 6878877   | 6923215   | High_rec | 0  | -     | 1   | 7.22  | 2  | 5.97  | 6890199   | 0.12 | 4.99  | 0.48 | 2 |
| plantHT | 74 | 6 | 7035995   | 7085996   | High_rec | 0  | -     | 3   | 6.23  | 1  | 6.11  | 7054033   | 0.1  | -3.85 | 0.32 | 2 |
| plantHT | 75 | 6 | 7137095   | 7200479   | High_rec | 1  | 5.03  | 1   | 5.03  | 6  | 6.64  | 7173293   | 0.11 | 6.43  | 0.5  | 2 |
| plantHT | 76 | 6 | 7580778   | 7628109   | High_rec | 0  | -     | 0   | -     | 1  | 5.52  | 7621889   | 0.09 | 6.09  | 0.36 | 1 |
| plantHT | 77 | 6 | 8319621   | 9931959   | Low_rec  | 0  | -     | 4   | 5.66  | 0  | -     | 9201138   | 0.1  | -5.61 | 0.39 | 1 |
| plantHT | 78 | 6 | 12258527  | 20758095  | Low_rec  | 15 | 16.23 | 179 | 17.31 | 40 | 15.77 | 20330595  | 0.27 | -8.99 | 0.26 | 4 |
| plantHT | 79 | 6 | 21037721  | 23951687  | Low_rec  | 6  | 8.58  | 45  | 11.42 | 16 | 9.41  | 22905376  | 0.19 | -5.45 | 0.31 | 3 |
| plantHT | 80 | 6 | 24184017  | 26606537  | Low_rec  | 1  | 5.07  | 6   | 8.17  | 0  | -     | 25317825  | 0.13 | -4.41 | 0.2  | 2 |
| plantHT | 81 | 6 | 26695327  | 28659766  | Low_rec  | 4  | 7.02  | 27  | 7.99  | 6  | 9.84  | 28130108  | 0.16 | -5.14 | 0.44 | 2 |
| plantHT | 82 | 6 | 29889263  | 31839272  | Low_rec  | 0  | -     | 17  | 6.33  | 0  | -     | 30431595  | 0.1  | -4.42 | 0.28 | 3 |
| plantHT | 83 | 6 | 34399636  | 36132700  | Low_rec  | 0  | -     | 9   | 7.96  | 3  | 5.67  | 35682625  | 0.13 | -4.22 | 0.18 | 2 |
| plantHT | 84 | 6 | 38774263  | 39797024  | Low_rec  | 0  | -     | 4   | 5.24  | 0  | -     | 39271886  | 0.09 | -5.22 | 0.31 | 1 |
| plantHT | 85 | 6 | 58028052  | 58937645  | Low_rec  | 0  | -     | 0   | -     | 2  | 5.47  | 58454608  | 0.09 | 3.73  | 0.49 | 1 |
| plantHT | 86 | 6 | 59838789  | 60691901  | Low_rec  | 0  | -     | 1   | 5.53  | 0  | -     | 60265345  | 0.09 | 3.73  | 0.36 | 1 |
| plantHT | 87 | 6 | 70588923  | 71442056  | Low_rec  | 0  | -     | 0   | -     | 2  | 5.3   | 71015479  | 0.09 | -3.48 | 0.29 | 1 |
| plantHT | 88 | 6 | 73211444  | 74064559  | Low_rec  | 0  | -     | 0   | -     | 2  | 7.09  | 73638000  | 0.1  | -3.72 | 0.07 | 1 |
| plantHT | 89 | 6 | 74172319  | 75025431  | Low_rec  | 0  | -     | 0   | -     | 1  | 6.07  | 74598875  | 0.1  | -3.67 | 0.11 | 1 |
| plantHT | 90 | 6 | 76575904  | 77429419  | Low_rec  | 0  | -     | 0   | -     | 2  | 5.61  | 77002460  | 0.08 | -3.33 | 0.08 | 1 |
| plantHT | 91 | 6 | 81184322  | 82042709  | Low_rec  | 0  | -     | 1   | 5.33  | 6  | 5.62  | 81616126  | 0.09 | -3.63 | 0.18 | 1 |
| plantHT | 92 | 6 | 82331626  | 83184738  | Low_rec  | 0  | -     | 0   | -     | 1  | 7.83  | 82758182  | 0.12 | -4.07 | 0.09 | 2 |
| plantHT | 93 | 6 | 86161490  | 86191022  | High_rec | 0  | -     | 1   | 5.04  | 0  | -     | 86176359  | 0.08 | 3.42  | 0.37 | 1 |
| plantHT | 94 | 6 | 101463249 | 101501936 | High_rec | 0  | -     | 1   | 8.22  | 0  | -     | 101482646 | 0.14 | -5.98 | 0.17 | 2 |
| plantHT | 95 | 6 | 102186080 | 102222483 | High_rec | 0  | -     | 1   | 6.21  | 0  | -     | 102204371 | 0.1  | -3.88 | 0.07 | 1 |
| plantHT | 96 | 6 | 116720299 | 116766789 | High_rec | 0  | -     | 4   | 5.26  | 0  | -     | 116743071 | 0.08 | -3.14 | 0.33 | 1 |
| plantHT | 97 | 6 | 156746705 | 156760053 | High_rec | 0  | -     | 1   | 5.16  | 0  | -     | 156753400 | 0.07 | 2.72  | 0.13 | 1 |
| plantHT | 98 | 6 | 156814745 | 156828377 | High_rec | 0  | -     | 0   | -     | 3  | 5.24  | 156821419 | 0.08 | -2.61 | 0.4  | 1 |
| plantHT | 99 | 6 | 156833841 | 156847573 | High_rec | 0  | -     | 0   | -     | 2  | 5.74  | 156840941 | 0.07 | 2.78  | 0.14 | 1 |

plantHT

|         |     |   |           |           |          |   |      |    |       |    |      |           |      |       |      |   |
|---------|-----|---|-----------|-----------|----------|---|------|----|-------|----|------|-----------|------|-------|------|---|
| plantHT | 100 | 6 | 156871812 | 156885333 | High_rec | 0 | -    | 0  | -     | 13 | 7.69 | 156878690 | 0.09 | 3.18  | 0.13 | 1 |
| plantHT | 101 | 6 | 157013376 | 157026581 | High_rec | 0 | -    | 0  | -     | 1  | 5.85 | 157019989 | 0.08 | 2.81  | 0.18 | 1 |
| plantHT | 102 | 6 | 157138621 | 157151761 | High_rec | 0 | -    | 1  | 5.09  | 0  | -    | 157145195 | 0.08 | -2.74 | 0.07 | 1 |
| plantHT | 103 | 6 | 157357363 | 157377851 | High_rec | 0 | -    | 7  | 6.79  | 0  | -    | 157370084 | 0.09 | 3.06  | 0.15 | 1 |
| plantHT | 104 | 6 | 157440112 | 157453102 | High_rec | 0 | -    | 1  | 5.59  | 0  | -    | 157446584 | 0.07 | 2.72  | 0.18 | 1 |
| plantHT | 105 | 6 | 157474973 | 157498551 | High_rec | 0 | -    | 19 | 6.12  | 5  | 5.04 | 157481507 | 0.07 | 2.81  | 0.18 | 1 |
| plantHT | 106 | 6 | 162717976 | 162727220 | High_rec | 0 | -    | 0  | -     | 2  | 5.23 | 162722611 | 0.08 | 2.91  | 0.35 | 1 |
| plantHT | 107 | 6 | 164671184 | 164680404 | High_rec | 0 | -    | 0  | -     | 1  | 5.26 | 164675808 | 0.09 | -3.66 | 0.22 | 1 |
| plantHT | 108 | 7 | 140691382 | 140723467 | High_rec | 0 | -    | 0  | -     | 1  | 6.37 | 140707428 | 0.1  | -3.03 | 0.34 | 1 |
| plantHT | 109 | 7 | 162151164 | 162162059 | High_rec | 0 | -    | 1  | 5.45  | 0  | -    | 162156601 | 0.09 | -4.77 | 0.13 | 1 |
| plantHT | 110 | 8 | 12767198  | 12798330  | High_rec | 0 | -    | 1  | 12.44 | 0  | -    | 12782777  | 0.19 | -7.67 | 0.22 | 3 |
| plantHT | 111 | 8 | 20943317  | 20976973  | High_rec | 0 | -    | 0  | -     | 1  | 5.06 | 20960128  | 0.08 | 2.52  | 0.29 | 1 |
| plantHT | 112 | 8 | 72124845  | 73114139  | Low_rec  | 0 | -    | 0  | -     | 2  | 5.48 | 72619486  | 0.09 | 2.58  | 0.08 | 1 |
| plantHT | 113 | 8 | 80665872  | 81669450  | Low_rec  | 1 | 5.23 | 6  | 5.26  | 0  | -    | 81163273  | 0.09 | 3.9   | 0.42 | 1 |
| plantHT | 114 | 8 | 94373062  | 94503325  | High_rec | 3 | 5.02 | 0  | -     | 0  | -    | 94437634  | 0.08 | -3.48 | 0.47 | 1 |
| plantHT | 115 | 8 | 97758673  | 97896418  | High_rec | 0 | -    | 1  | 5.11  | 0  | -    | 97827521  | 0.08 | -3.52 | 0.47 | 1 |
| plantHT | 116 | 8 | 105286143 | 105395246 | High_rec | 0 | -    | 1  | 6.02  | 1  | 5.56 | 105341062 | 0.09 | -3.06 | 0.31 | 1 |
| plantHT | 117 | 8 | 105418259 | 105830430 | High_rec | 0 | -    | 25 | 6.35  | 2  | 6.24 | 105589632 | 0.1  | -3.15 | 0.31 | 1 |
| plantHT | 118 | 8 | 107166679 | 107275984 | High_rec | 0 | -    | 3  | 6.17  | 2  | 5.78 | 107214791 | 0.1  | 4.02  | 0.45 | 1 |
| plantHT | 119 | 8 | 116460940 | 116500225 | High_rec | 0 | -    | 1  | 5.06  | 0  | -    | 116480574 | 0.09 | -4.33 | 0.23 | 1 |
| plantHT | 120 | 8 | 117537409 | 117576295 | High_rec | 0 | -    | 0  | -     | 1  | 5.95 | 117556845 | 0.1  | 3.27  | 0.09 | 1 |
| plantHT | 121 | 8 | 138883118 | 139872400 | Low_rec  | 0 | -    | 1  | 5.38  | 0  | -    | 139377759 | 0.09 | -2.74 | 0.12 | 1 |
| plantHT | 122 | 8 | 160401751 | 160447830 | High_rec | 0 | -    | 1  | 5.24  | 0  | -    | 160424821 | 0.09 | -3.05 | 0.13 | 1 |
| plantHT | 123 | 8 | 160951326 | 160998158 | High_rec | 1 | 5.9  | 4  | 6.26  | 0  | -    | 160975429 | 0.1  | -3.5  | 0.29 | 1 |
| plantHT | 124 | 8 | 161512973 | 161556763 | High_rec | 0 | -    | 1  | 5.78  | 1  | 5.84 | 161532997 | 0.09 | 3.76  | 0.31 | 1 |
| plantHT | 125 | 8 | 163165106 | 163197591 | High_rec | 1 | 5.24 | 1  | 5.05  | 0  | -    | 163181361 | 0.09 | -3.01 | 0.17 | 1 |
| plantHT | 126 | 8 | 164045380 | 164074752 | High_rec | 0 | -    | 1  | 5.48  | 0  | -    | 164060097 | 0.09 | -2.93 | 0.36 | 1 |
| plantHT | 127 | 8 | 164916849 | 164943801 | High_rec | 0 | -    | 0  | -     | 1  | 5.13 | 164930328 | 0.08 | -3.09 | 0.1  | 1 |
| plantHT | 128 | 8 | 166516109 | 166540119 | High_rec | 0 | -    | 0  | -     | 1  | 5    | 166528112 | 0.08 | -3.56 | 0.24 | 1 |
| plantHT | 129 | 8 | 169648032 | 169671513 | High_rec | 0 | -    | 5  | 7.82  | 0  | -    | 169660749 | 0.13 | 4.37  | 0.08 | 1 |
| plantHT | 130 | 9 | 81917032  | 83713717  | Low_rec  | 0 | -    | 2  | 5.18  | 0  | -    | 82816691  | 0.08 | -2.58 | 0.43 | 1 |
| plantHT | 131 | 9 | 130880006 | 130960308 | High_rec | 0 | -    | 0  | -     | 1  | 5.18 | 130920301 | 0.08 | 2.72  | 0.5  | 1 |
| plantHT | 132 | 9 | 151569497 | 151581748 | High_rec | 0 | -    | 4  | 6.65  | 3  | 6.2  | 151575511 | 0.11 | -3.09 | 0.33 | 5 |
| plantHT | 133 | 9 | 151628466 | 151639696 | High_rec | 0 | -    | 0  | -     | 1  | 5.09 | 151634075 | 0.08 | -3.15 | 0.31 | 1 |

plantHT

|         |     |    |           |           |          |   |      |    |      |   |      |           |      |       |      |   |
|---------|-----|----|-----------|-----------|----------|---|------|----|------|---|------|-----------|------|-------|------|---|
| plantHT | 134 | 9  | 151699366 | 151710544 | High_rec | 0 | -    | 0  | -    | 2 | 5.03 | 151704950 | 0.09 | 3.69  | 0.11 | 1 |
| plantHT | 135 | 9  | 152249195 | 152260004 | High_rec | 0 | -    | 1  | 5.01 | 0 | -    | 152254602 | 0.08 | -2.45 | 0.37 | 1 |
| plantHT | 136 | 10 | 16016248  | 16045633  | High_rec | 0 | -    | 0  | -    | 4 | 5.42 | 16030914  | 0.08 | 2.72  | 0.39 | 1 |
| plantHT | 137 | 10 | 16186571  | 16240691  | High_rec | 0 | -    | 0  | -    | 1 | 5.32 | 16213631  | 0.07 | 2.69  | 0.4  | 1 |
| plantHT | 138 | 10 | 16459993  | 16607534  | High_rec | 0 | -    | 7  | 6.62 | 0 | -    | 16499943  | 0.1  | 3.01  | 0.36 | 1 |
| plantHT | 139 | 10 | 18554424  | 20207537  | Low_rec  | 0 | -    | 3  | 5.22 | 0 | -    | 19376041  | 0.08 | 2.87  | 0.2  | 1 |
| plantHT | 140 | 10 | 80563106  | 80601043  | High_rec | 0 | -    | 0  | -    | 1 | 5.02 | 80582011  | 0.08 | 4.05  | 0.21 | 1 |
| plantHT | 141 | 10 | 85309533  | 85333793  | High_rec | 1 | 5.19 | 0  | -    | 2 | 5.05 | 85323080  | 0.09 | 3.91  | 0.3  | 1 |
| plantHT | 142 | 10 | 105652946 | 108635959 | Low_rec  | 4 | 5.42 | 36 | 5.71 | 1 | 5.22 | 106716906 | 0.09 | -3.57 | 0.44 | 2 |
| plantHT | 143 | 10 | 126433919 | 128437403 | Low_rec  | 0 | -    | 0  | -    | 3 | 5.98 | 127615412 | 0.09 | 2.42  | 0.3  | 1 |
| plantHT | 144 | 10 | 128938447 | 129019203 | High_rec | 0 | -    | 1  | 5.12 | 1 | 5.1  | 128989375 | 0.08 | -2.38 | 0.45 | 1 |
| plantHT | 145 | 10 | 129176048 | 129233466 | High_rec | 0 | -    | 0  | -    | 2 | 5.27 | 129204835 | 0.08 | -2.51 | 0.19 | 1 |
| plantHT | 146 | 10 | 129233933 | 129376028 | High_rec | 0 | -    | 6  | 5.21 | 0 | -    | 129262411 | 0.08 | -2.5  | 0.27 | 1 |
| plantHT | 147 | 10 | 129561046 | 129614472 | High_rec | 0 | -    | 0  | -    | 1 | 6.62 | 129587852 | 0.11 | -2.76 | 0.25 | 1 |
| plantHT | 148 | 10 | 129740709 | 129840885 | High_rec | 0 | -    | 3  | 5.64 | 2 | 5.39 | 129813112 | 0.09 | -2.52 | 0.27 | 1 |
| plantHT | 149 | 10 | 129870423 | 129967710 | High_rec | 0 | -    | 10 | 6.21 | 1 | 5.65 | 129942753 | 0.1  | -2.7  | 0.28 | 1 |
| plantHT | 150 | 10 | 130005655 | 130103695 | High_rec | 0 | -    | 4  | 6.07 | 3 | 5.98 | 130030295 | 0.1  | -2.66 | 0.3  | 1 |
| plantHT | 151 | 10 | 130426599 | 130472404 | High_rec | 0 | -    | 2  | 5.21 | 0 | -    | 130449451 | 0.08 | -2.62 | 0.1  | 1 |
| plantHT | 152 | 10 | 132353858 | 132387749 | High_rec | 0 | -    | 1  | 6.18 | 0 | -    | 132370800 | 0.1  | 2.94  | 0.49 | 1 |
| plantHT | 153 | 10 | 132496683 | 132529943 | High_rec | 0 | -    | 1  | 5.28 | 0 | -    | 132513268 | 0.07 | 2.77  | 0.25 | 1 |
| plantHT | 154 | 10 | 132540583 | 132576604 | High_rec | 0 | -    | 0  | -    | 2 | 5.43 | 132557064 | 0.08 | 2.83  | 0.25 | 1 |
| plantHT | 155 | 10 | 134446009 | 134471611 | High_rec | 0 | -    | 0  | -    | 1 | 7.85 | 134458869 | 0.08 | 3.11  | 0.17 | 1 |
| plantHT | 156 | 10 | 136796998 | 136812867 | High_rec | 0 | -    | 1  | 5.42 | 0 | -    | 136805030 | 0.08 | 2.78  | 0.16 | 1 |
| plantHT | 157 | 10 | 136825723 | 136841487 | High_rec | 0 | -    | 0  | -    | 1 | 5.61 | 136833707 | 0.08 | 2.8   | 0.16 | 1 |
| plantHT | 158 | 10 | 137420067 | 137433792 | High_rec | 0 | -    | 0  | -    | 5 | 5.8  | 137426815 | 0.09 | 2.81  | 0.23 | 1 |
| plantHT | 159 | 10 | 146166955 | 146178148 | High_rec | 0 | -    | 0  | -    | 1 | 5.33 | 146172455 | 0.09 | -3.13 | 0.11 | 1 |
| plantHT | 160 | 10 | 146681890 | 146694750 | High_rec | 0 | -    | 4  | 5.52 | 1 | 5.38 | 146687922 | 0.09 | 3.28  | 0.48 | 2 |

## GY

| QTLs Summary grain yield trait |     |     |            |            |          |         |                 |          |                  |          |                  |           |          |           |      |           |
|--------------------------------|-----|-----|------------|------------|----------|---------|-----------------|----------|------------------|----------|------------------|-----------|----------|-----------|------|-----------|
| Trait                          | QTL | Chr | LowerLimit | UpperLimit | Rec      | NbSNP50 | LogPva<br>Max50 | NbSNP600 | LogPva<br>Max600 | NbSNPGBS | LogPva<br>MaxGBS | PosMax    | R2_LDMax | EffectMax | MAF  | NbDiffEnv |
| GY                             | 1   | 1   | 2402699    | 2498209    | High_rec | 0       | -               | 3        | 5.55             | 0        | -                | 2430515   | 0.07     | -0.25     | 0.43 | 2         |
| GY                             | 2   | 1   | 2769801    | 2827512    | High_rec | 0       | -               | 3        | 5.13             | 0        | -                | 2797566   | 0.07     | -0.31     | 0.3  | 1         |
| GY                             | 3   | 1   | 3250949    | 3306308    | High_rec | 0       | -               | 1        | 6.26             | 0        | -                | 3278633   | 0.08     | -0.27     | 0.25 | 1         |
| GY                             | 4   | 1   | 3851111    | 3906188    | High_rec | 0       | -               | 0        | -                | 1        | 5.73             | 3878654   | 0.07     | 0.27      | 0.48 | 1         |
| GY                             | 5   | 1   | 10801972   | 10850424   | High_rec | 0       | -               | 1        | 5.08             | 0        | -                | 10826196  | 0.07     | 0.41      | 0.36 | 1         |
| GY                             | 6   | 1   | 13661823   | 13709598   | High_rec | 0       | -               | 1        | 5.24             | 0        | -                | 13685715  | 0.07     | 0.24      | 0.16 | 1         |
| GY                             | 7   | 1   | 23524734   | 23602979   | High_rec | 0       | -               | 1        | 5.51             | 1        | 5.9              | 23563795  | 0.08     | 0.24      | 0.07 | 1         |
| GY                             | 8   | 1   | 30496831   | 30639114   | High_rec | 0       | -               | 1        | 5.15             | 0        | -                | 30567305  | 0.07     | -0.27     | 0.26 | 1         |
| GY                             | 9   | 1   | 31129827   | 31284518   | High_rec | 0       | -               | 0        | -                | 1        | 5.37             | 31206955  | 0.07     | -0.29     | 0.24 | 1         |
| GY                             | 10  | 1   | 33020646   | 33225898   | High_rec | 0       | -               | 1        | 6.04             | 0        | -                | 33122606  | 0.08     | -0.29     | 0.1  | 1         |
| GY                             | 11  | 1   | 34497471   | 35124529   | Low_rec  | 1       | 5.39            | 1        | 5.31             | 0        | -                | 34811000  | 0.07     | -0.27     | 0.46 | 1         |
| GY                             | 12  | 1   | 49480215   | 50107273   | Low_rec  | 0       | -               | 1        | 5.02             | 0        | -                | 49793744  | 0.07     | 0.35      | 0.21 | 1         |
| GY                             | 13  | 1   | 50125831   | 51092271   | Low_rec  | 0       | -               | 16       | 6.5              | 1        | 6.03             | 50763476  | 0.09     | 0.4       | 0.25 | 1         |
| GY                             | 14  | 1   | 59154671   | 59781729   | Low_rec  | 0       | -               | 1        | 5.16             | 0        | -                | 59468200  | 0.06     | -0.33     | 0.34 | 1         |
| GY                             | 15  | 1   | 61310322   | 61937380   | Low_rec  | 0       | -               | 0        | -                | 1        | 5.38             | 61623851  | 0.07     | -0.37     | 0.16 | 1         |
| GY                             | 16  | 1   | 92185740   | 92315531   | High_rec | 1       | 5.77            | 8        | 5.77             | 4        | 5.95             | 92258968  | 0.08     | -0.4      | 0.36 | 1         |
| GY                             | 17  | 1   | 99395524   | 99577219   | High_rec | 0       | -               | 2        | 5.29             | 0        | -                | 99485155  | 0.07     | 0.32      | 0.32 | 1         |
| GY                             | 18  | 1   | 119187876  | 119814934  | Low_rec  | 0       | -               | 1        | 5.18             | 0        | -                | 119501405 | 0.07     | -0.45     | 0.27 | 1         |
| GY                             | 19  | 1   | 160494511  | 160688630  | High_rec | 0       | -               | 1        | 5.74             | 0        | -                | 160591663 | 0.08     | -0.32     | 0.07 | 1         |
| GY                             | 20  | 1   | 175793759  | 177099412  | High_rec | 1       | 5.24            | 4        | 5.24             | 0        | -                | 177032609 | 0.06     | -0.28     | 0.1  | 1         |
| GY                             | 21  | 1   | 177131730  | 177635526  | High_rec | 0       | -               | 13       | 5.8              | 1        | 5.03             | 177571482 | 0.07     | -0.29     | 0.09 | 3         |
| GY                             | 22  | 1   | 182457560  | 182611749  | High_rec | 0       | -               | 1        | 5.07             | 0        | -                | 182534629 | 0.06     | -0.35     | 0.12 | 1         |
| GY                             | 23  | 1   | 197722872  | 197865235  | High_rec | 0       | -               | 0        | -                | 1        | 5.45             | 197794071 | 0.07     | 0.32      | 0.46 | 1         |
| GY                             | 24  | 1   | 209728593  | 209851568  | High_rec | 1       | 5.96            | 1        | 5.96             | 2        | 6.18             | 209790097 | 0.08     | -0.38     | 0.27 | 1         |
| GY                             | 25  | 1   | 211561281  | 211675296  | High_rec | 0       | -               | 2        | 5.12             | 0        | -                | 211618490 | 0.06     | -0.38     | 0.43 | 1         |
| GY                             | 26  | 1   | 217222304  | 217315640  | High_rec | 0       | -               | 1        | 5.27             | 0        | -                | 217269004 | 0.07     | -0.35     | 0.17 | 1         |
| GY                             | 27  | 1   | 217592754  | 217685079  | High_rec | 0       | -               | 0        | -                | 1        | 5.25             | 217638947 | 0.06     | -0.22     | 0.23 | 1         |
| GY                             | 28  | 1   | 234166716  | 234270684  | High_rec | 0       | -               | 1        | 5.05             | 1        | 5.02             | 234219088 | 0.07     | 0.34      | 0.38 | 1         |
| GY                             | 29  | 1   | 240393911  | 240546232  | High_rec | 0       | -               | 1        | 5.64             | 0        | -                | 240469888 | 0.07     | 0.27      | 0.47 | 1         |
| GY                             | 30  | 1   | 273030312  | 273171229  | High_rec | 0       | -               | 0        | -                | 1        | 5.28             | 273100855 | 0.07     | 0.31      | 0.39 | 1         |
| GY                             | 31  | 1   | 277994916  | 278103033  | High_rec | 0       | -               | 0        | -                | 1        | 5.58             | 278049081 | 0.08     | -0.39     | 0.16 | 1         |

GY

|    |    |   |           |           |          |   |      |   |      |    |      |           |      |       |      |   |
|----|----|---|-----------|-----------|----------|---|------|---|------|----|------|-----------|------|-------|------|---|
| GY | 32 | 1 | 278454657 | 278559409 | High_rec | 0 | -    | 0 | -    | 1  | 5.07 | 278507113 | 0.07 | -0.38 | 0.13 | 1 |
| GY | 33 | 1 | 295279301 | 295344931 | High_rec | 0 | -    | 0 | -    | 1  | 5.07 | 295312114 | 0.06 | 0.26  | 0.18 | 1 |
| GY | 34 | 1 | 295403783 | 295487928 | High_rec | 0 | -    | 0 | -    | 3  | 6.17 | 295455056 | 0.08 | 0.29  | 0.28 | 3 |
| GY | 35 | 1 | 295530124 | 295667295 | High_rec | 0 | -    | 2 | 6.12 | 2  | 5.46 | 295634353 | 0.08 | -0.29 | 0.36 | 2 |
| GY | 36 | 1 | 295693880 | 295824410 | High_rec | 0 | -    | 5 | 6.72 | 1  | 7    | 295790807 | 0.1  | -0.31 | 0.4  | 2 |
| GY | 37 | 2 | 7517105   | 7532653   | High_rec | 0 | -    | 1 | 5.3  | 0  | -    | 7524873   | 0.07 | 0.22  | 0.38 | 1 |
| GY | 38 | 2 | 9001256   | 9017236   | High_rec | 0 | -    | 0 | -    | 1  | 5.18 | 9009253   | 0.07 | -0.38 | 0.27 | 1 |
| GY | 39 | 2 | 16222636  | 16243320  | High_rec | 0 | -    | 0 | -    | 1  | 5.07 | 16232975  | 0.07 | -0.38 | 0.38 | 1 |
| GY | 40 | 2 | 45935133  | 46038080  | High_rec | 0 | -    | 0 | -    | 3  | 5.1  | 45986540  | 0.06 | -0.31 | 0.08 | 1 |
| GY | 41 | 2 | 80255693  | 81196295  | Low_rec  | 0 | -    | 1 | 5.35 | 0  | -    | 80725994  | 0.07 | -0.33 | 0.07 | 1 |
| GY | 42 | 2 | 85015940  | 85956542  | Low_rec  | 0 | -    | 0 | -    | 1  | 5.11 | 85486241  | 0.07 | -0.34 | 0.06 | 1 |
| GY | 43 | 2 | 119191729 | 120132331 | Low_rec  | 0 | -    | 1 | 5.62 | 0  | -    | 119662030 | 0.07 | -0.34 | 0.28 | 1 |
| GY | 44 | 2 | 129971437 | 130912039 | Low_rec  | 0 | -    | 1 | 5.62 | 0  | -    | 130441738 | 0.08 | -0.42 | 0.14 | 1 |
| GY | 45 | 2 | 189545188 | 189567434 | High_rec | 0 | -    | 0 | -    | 1  | 5.03 | 189556296 | 0.06 | -0.38 | 0.11 | 1 |
| GY | 46 | 2 | 191098387 | 191123353 | High_rec | 0 | -    | 0 | -    | 1  | 5.7  | 191110847 | 0.08 | -0.42 | 0.11 | 1 |
| GY | 47 | 2 | 223384923 | 223424702 | High_rec | 0 | -    | 0 | -    | 3  | 5.33 | 223410110 | 0.07 | 0.33  | 0.08 | 1 |
| GY | 48 | 3 | 1544658   | 1561384   | High_rec | 0 | -    | 1 | 5.39 | 0  | -    | 1553046   | 0.07 | -0.27 | 0.09 | 1 |
| GY | 49 | 3 | 5570151   | 5587140   | High_rec | 0 | -    | 0 | -    | 1  | 5.23 | 5578685   | 0.06 | 0.23  | 0.21 | 1 |
| GY | 50 | 3 | 6730402   | 6748004   | High_rec | 0 | -    | 0 | -    | 1  | 5.57 | 6739154   | 0.08 | 0.4   | 0.06 | 1 |
| GY | 51 | 3 | 6785521   | 6803164   | High_rec | 0 | -    | 0 | -    | 1  | 5.61 | 6794287   | 0.08 | 0.4   | 0.06 | 1 |
| GY | 52 | 3 | 7595591   | 7613956   | High_rec | 0 | -    | 0 | -    | 1  | 5.36 | 7604776   | 0.07 | 0.42  | 0.08 | 1 |
| GY | 53 | 3 | 8255937   | 8283262   | High_rec | 0 | -    | 2 | 5.2  | 1  | 5.46 | 8265546   | 0.07 | 0.31  | 0.12 | 3 |
| GY | 54 | 3 | 8893813   | 8913904   | High_rec | 0 | -    | 1 | 5.27 | 0  | -    | 8903812   | 0.07 | 0.3   | 0.42 | 1 |
| GY | 55 | 3 | 9055736   | 9076097   | High_rec | 0 | -    | 0 | -    | 1  | 5.12 | 9065883   | 0.07 | -0.35 | 0.08 | 1 |
| GY | 56 | 3 | 13445017  | 13480210  | High_rec | 0 | -    | 1 | 5.81 | 0  | -    | 13462582  | 0.08 | -0.41 | 0.26 | 1 |
| GY | 57 | 3 | 13519894  | 13555522  | High_rec | 0 | -    | 1 | 5.03 | 0  | -    | 13537651  | 0.06 | -0.35 | 0.22 | 1 |
| GY | 58 | 3 | 17361568  | 17435698  | High_rec | 0 | -    | 2 | 5.81 | 2  | 6.64 | 17398949  | 0.09 | -0.43 | 0.17 | 2 |
| GY | 59 | 3 | 55430141  | 57938557  | Low_rec  | 0 | -    | 1 | 5.13 | 2  | 5.37 | 57083327  | 0.07 | 0.27  | 0.09 | 1 |
| GY | 60 | 3 | 67086601  | 69216613  | Low_rec  | 2 | 5.08 | 8 | 5.08 | 0  | -    | 67940985  | 0.06 | 0.2   | 0.44 | 1 |
| GY | 61 | 3 | 113500273 | 115287265 | Low_rec  | 0 | -    | 1 | 5.07 | 1  | 5.62 | 114432881 | 0.08 | -0.37 | 0.35 | 2 |
| GY | 62 | 3 | 119892518 | 121878783 | Low_rec  | 0 | -    | 3 | 5.13 | 0  | -    | 120746902 | 0.06 | 0.26  | 0.22 | 1 |
| GY | 63 | 3 | 126377913 | 128086681 | Low_rec  | 0 | -    | 1 | 5.22 | 0  | -    | 127232297 | 0.07 | -0.35 | 0.15 | 1 |
| GY | 64 | 3 | 134010750 | 137430424 | Low_rec  | 0 | -    | 4 | 5.79 | 4  | 6.18 | 136336334 | 0.08 | 0.29  | 0.18 | 2 |
| GY | 65 | 3 | 140505559 | 144210207 | Low_rec  | 1 | 8.13 | 6 | 5.97 | 11 | 5.57 | 141621777 | 0.12 | 0.42  | 0.27 | 5 |

GY

|    |    |   |           |           |          |   |      |    |      |   |      |           |      |       |      |   |
|----|----|---|-----------|-----------|----------|---|------|----|------|---|------|-----------|------|-------|------|---|
| GY | 66 | 3 | 147180927 | 148954917 | Low_rec  | 0 | -    | 2  | 5.33 | 0 | -    | 148100533 | 0.07 | -0.21 | 0.19 | 2 |
| GY | 67 | 3 | 155759299 | 155841816 | High_rec | 1 | 5.77 | 2  | 5.54 | 1 | 5.75 | 155803805 | 0.08 | -0.37 | 0.37 | 2 |
| GY | 68 | 3 | 155917683 | 155998088 | High_rec | 1 | 5.82 | 0  | -    | 1 | 5.49 | 155960553 | 0.08 | -0.36 | 0.18 | 2 |
| GY | 69 | 3 | 156599854 | 156673063 | High_rec | 0 | -    | 2  | 6.42 | 1 | 5.5  | 156637379 | 0.09 | -0.4  | 0.25 | 4 |
| GY | 70 | 3 | 157723648 | 157791820 | High_rec | 1 | 5.05 | 2  | 5.14 | 0 | -    | 157756845 | 0.07 | 0.34  | 0.42 | 1 |
| GY | 71 | 3 | 157908645 | 157974252 | High_rec | 0 | -    | 0  | -    | 1 | 5.39 | 157941470 | 0.07 | 0.32  | 0.13 | 1 |
| GY | 72 | 3 | 158677902 | 158740675 | High_rec | 0 | -    | 1  | 5.1  | 0 | -    | 158709297 | 0.06 | -0.26 | 0.47 | 1 |
| GY | 73 | 3 | 158740828 | 158803383 | High_rec | 0 | -    | 0  | -    | 2 | 5.58 | 158772115 | 0.07 | -0.28 | 0.26 | 1 |
| GY | 74 | 3 | 158943646 | 159005990 | High_rec | 0 | -    | 5  | 7.05 | 0 | -    | 158974646 | 0.1  | 0.41  | 0.41 | 5 |
| GY | 75 | 3 | 159360179 | 159656444 | High_rec | 1 | 5.5  | 56 | 6.05 | 1 | 5.37 | 159448298 | 0.08 | 0.39  | 0.48 | 2 |
| GY | 76 | 3 | 159713532 | 159830643 | High_rec | 0 | -    | 4  | 7.7  | 1 | 5.96 | 159743301 | 0.11 | 0.4   | 0.14 | 1 |
| GY | 77 | 3 | 160485754 | 160543923 | High_rec | 1 | 5.65 | 3  | 5.65 | 0 | -    | 160514830 | 0.08 | 0.38  | 0.34 | 1 |
| GY | 78 | 3 | 161943144 | 161995521 | High_rec | 0 | -    | 0  | -    | 1 | 5.03 | 161969350 | 0.06 | 0.32  | 0.27 | 1 |
| GY | 79 | 3 | 162802032 | 162856178 | High_rec | 0 | -    | 2  | 5.77 | 0 | -    | 162831329 | 0.07 | -0.27 | 0.21 | 1 |
| GY | 80 | 3 | 163676681 | 163723804 | High_rec | 0 | -    | 1  | 5.18 | 0 | -    | 163700269 | 0.06 | -0.26 | 0.17 | 1 |
| GY | 81 | 3 | 167031993 | 167070863 | High_rec | 1 | 5.1  | 1  | 5.1  | 0 | -    | 167051430 | 0.07 | 0.33  | 0.21 | 1 |
| GY | 82 | 3 | 168464897 | 168501504 | High_rec | 0 | -    | 1  | 5.56 | 0 | -    | 168483210 | 0.07 | 0.35  | 0.11 | 1 |
| GY | 83 | 3 | 168903958 | 168940032 | High_rec | 0 | -    | 0  | -    | 2 | 6.12 | 168922004 | 0.08 | -0.36 | 0.48 | 1 |
| GY | 84 | 3 | 172033815 | 172067232 | High_rec | 0 | -    | 0  | -    | 1 | 5.06 | 172050543 | 0.07 | 0.38  | 0.44 | 1 |
| GY | 85 | 3 | 186994852 | 187057772 | High_rec | 1 | 8.49 | 4  | 8.12 | 0 | -    | 187028970 | 0.12 | -0.48 | 0.28 | 1 |
| GY | 86 | 3 | 187363380 | 187421586 | High_rec | 0 | -    | 1  | 5.11 | 0 | -    | 187392463 | 0.07 | 0.45  | 0.47 | 1 |
| GY | 87 | 3 | 188510221 | 188569744 | High_rec | 0 | -    | 1  | 5.26 | 1 | 6.17 | 188539926 | 0.08 | -0.42 | 0.18 | 1 |
| GY | 88 | 3 | 193865937 | 193920520 | High_rec | 0 | -    | 0  | -    | 1 | 5.14 | 193893247 | 0.06 | 0.23  | 0.38 | 1 |
| GY | 89 | 3 | 201662051 | 201713930 | High_rec | 0 | -    | 2  | 5.46 | 0 | -    | 201688333 | 0.07 | -0.25 | 0.27 | 1 |
| GY | 90 | 3 | 201971469 | 202022435 | High_rec | 0 | -    | 0  | -    | 1 | 5.01 | 201996963 | 0.06 | -0.32 | 0.13 | 1 |
| GY | 91 | 3 | 207280135 | 207324467 | High_rec | 0 | -    | 1  | 5.03 | 0 | -    | 207302311 | 0.06 | -0.38 | 0.24 | 1 |
| GY | 92 | 3 | 215987072 | 216023874 | High_rec | 0 | -    | 1  | 5.74 | 0 | -    | 216005480 | 0.08 | -0.27 | 0.21 | 1 |
| GY | 93 | 3 | 229851258 | 229884124 | High_rec | 0 | -    | 0  | -    | 1 | 5.28 | 229867690 | 0.07 | -0.39 | 0.42 | 1 |
| GY | 94 | 4 | 7249884   | 7267600   | High_rec | 0 | -    | 1  | 5.41 | 0 | -    | 7258757   | 0.07 | -0.36 | 0.19 | 1 |
| GY | 95 | 4 | 50492621  | 52101017  | Low_rec  | 0 | -    | 1  | 5.93 | 0 | -    | 51296819  | 0.08 | -0.45 | 0.15 | 1 |
| GY | 96 | 4 | 56166195  | 57774591  | Low_rec  | 0 | -    | 0  | -    | 1 | 5.08 | 56970393  | 0.06 | 0.41  | 0.41 | 1 |
| GY | 97 | 4 | 173817657 | 173850094 | High_rec | 0 | -    | 2  | 5.15 | 0 | -    | 173837172 | 0.07 | 0.41  | 0.25 | 1 |
| GY | 98 | 4 | 175824255 | 175849662 | High_rec | 0 | -    | 1  | 5.35 | 0 | -    | 175836951 | 0.07 | 0.38  | 0.11 | 1 |
| GY | 99 | 4 | 229776114 | 229801774 | High_rec | 0 | -    | 0  | -    | 3 | 5.43 | 229788890 | 0.07 | -0.33 | 0.31 | 1 |

GY

|    |     |   |           |           |          |   |      |    |       |   |      |           |      |       |      |   |
|----|-----|---|-----------|-----------|----------|---|------|----|-------|---|------|-----------|------|-------|------|---|
| GY | 100 | 4 | 235537995 | 235555673 | High_rec | 0 | -    | 1  | 5.01  | 0 | -    | 235546910 | 0.06 | -0.19 | 0.32 | 1 |
| GY | 101 | 5 | 2697078   | 2713888   | High_rec | 0 | -    | 0  | -     | 1 | 5.03 | 2705402   | 0.06 | -0.31 | 0.1  | 1 |
| GY | 102 | 5 | 5425620   | 5444179   | High_rec | 0 | -    | 1  | 5.03  | 0 | -    | 5435055   | 0.07 | 0.42  | 0.45 | 1 |
| GY | 103 | 5 | 5764181   | 5783344   | High_rec | 0 | -    | 2  | 5.44  | 0 | -    | 5773880   | 0.07 | 0.46  | 0.49 | 1 |
| GY | 104 | 5 | 6662379   | 6682923   | High_rec | 0 | -    | 1  | 5.03  | 0 | -    | 6672502   | 0.07 | -0.38 | 0.21 | 1 |
| GY | 105 | 5 | 15446925  | 15481187  | High_rec | 0 | -    | 1  | 5.29  | 0 | -    | 15464057  | 0.07 | -0.37 | 0.1  | 1 |
| GY | 106 | 5 | 168427768 | 168475392 | High_rec | 2 | 5.03 | 3  | 5.54  | 0 | -    | 168450124 | 0.08 | 0.42  | 0.31 | 1 |
| GY | 107 | 5 | 168643660 | 168687788 | High_rec | 1 | 5.61 | 1  | 5.44  | 0 | -    | 168665734 | 0.08 | 0.44  | 0.21 | 1 |
| GY | 108 | 5 | 188439918 | 188491138 | High_rec | 0 | -    | 1  | 5.56  | 6 | 5.73 | 188465891 | 0.08 | 0.31  | 0.41 | 2 |
| GY | 109 | 5 | 210586093 | 210600435 | High_rec | 0 | -    | 1  | 5.03  | 0 | -    | 210593267 | 0.06 | -0.25 | 0.19 | 1 |
| GY | 110 | 6 | 338452    | 386662    | High_rec | 3 | 5.22 | 3  | 5.22  | 1 | 6.23 | 363667    | 0.09 | -0.49 | 0.46 | 1 |
| GY | 111 | 6 | 2573126   | 2609233   | High_rec | 0 | -    | 0  | -     | 1 | 5.32 | 2591199   | 0.07 | 0.46  | 0.34 | 1 |
| GY | 112 | 6 | 2707441   | 2742740   | High_rec | 0 | -    | 1  | 5.3   | 0 | -    | 2725115   | 0.07 | 0.48  | 0.32 | 1 |
| GY | 113 | 6 | 2862726   | 2897142   | High_rec | 0 | -    | 1  | 5.67  | 0 | -    | 2879992   | 0.08 | 0.5   | 0.32 | 1 |
| GY | 114 | 6 | 3220433   | 3253071   | High_rec | 0 | -    | 1  | 5.3   | 0 | -    | 3237069   | 0.07 | -0.32 | 0.13 | 1 |
| GY | 115 | 6 | 3296315   | 3328628   | High_rec | 1 | 7.07 | 1  | 6.91  | 0 | -    | 3312817   | 0.1  | 0.55  | 0.38 | 2 |
| GY | 116 | 6 | 4161248   | 4192870   | High_rec | 0 | -    | 1  | 5.11  | 2 | 7.4  | 4175558   | 0.1  | 0.59  | 0.35 | 2 |
| GY | 117 | 6 | 4220527   | 4250297   | High_rec | 0 | -    | 1  | 5.62  | 0 | -    | 4234790   | 0.08 | -0.45 | 0.13 | 1 |
| GY | 118 | 6 | 4293746   | 4323402   | High_rec | 0 | -    | 0  | -     | 1 | 6.03 | 4308083   | 0.07 | 0.5   | 0.48 | 1 |
| GY | 119 | 6 | 4346361   | 4375946   | High_rec | 0 | -    | 1  | 6.93  | 0 | -    | 4360811   | 0.1  | 0.58  | 0.36 | 2 |
| GY | 120 | 6 | 5131927   | 5177694   | High_rec | 3 | 8.24 | 1  | 7.97  | 0 | -    | 5155708   | 0.12 | -0.58 | 0.42 | 2 |
| GY | 121 | 6 | 5529578   | 5563284   | High_rec | 0 | -    | 3  | 6.4   | 1 | 5.02 | 5544662   | 0.09 | -0.49 | 0.26 | 1 |
| GY | 122 | 6 | 5623945   | 5659803   | High_rec | 0 | -    | 2  | 5.89  | 6 | 8.11 | 5638516   | 0.12 | -0.57 | 0.23 | 2 |
| GY | 123 | 6 | 5716057   | 5747692   | High_rec | 0 | -    | 1  | 5.55  | 0 | -    | 5729531   | 0.07 | -0.43 | 0.23 | 1 |
| GY | 124 | 6 | 5855407   | 5887383   | High_rec | 1 | 8.14 | 1  | 8.4   | 0 | -    | 5871000   | 0.12 | -0.56 | 0.42 | 2 |
| GY | 125 | 6 | 6002123   | 6034825   | High_rec | 1 | 7.69 | 1  | 5.05  | 0 | -    | 6020863   | 0.11 | -0.53 | 0.29 | 2 |
| GY | 126 | 6 | 6526300   | 6564102   | High_rec | 0 | -    | 0  | -     | 1 | 6.28 | 6546605   | 0.08 | 0.53  | 0.41 | 2 |
| GY | 127 | 6 | 6593785   | 6636807   | High_rec | 0 | -    | 7  | 10.44 | 1 | 6.23 | 6612654   | 0.16 | -0.65 | 0.32 | 2 |
| GY | 128 | 6 | 6793841   | 6837747   | High_rec | 0 | -    | 8  | 8.41  | 0 | -    | 6807462   | 0.12 | -0.54 | 0.26 | 2 |
| GY | 129 | 6 | 6878877   | 6930838   | High_rec | 0 | -    | 4  | 8.06  | 5 | 6.36 | 6890199   | 0.12 | 0.63  | 0.48 | 3 |
| GY | 130 | 6 | 7027497   | 7088575   | High_rec | 0 | -    | 8  | 8.71  | 6 | 8.54 | 7046773   | 0.13 | 0.62  | 0.4  | 3 |
| GY | 131 | 6 | 7113662   | 7200479   | High_rec | 1 | 6.8  | 12 | 6.8   | 9 | 8.24 | 7159714   | 0.12 | 0.59  | 0.39 | 3 |
| GY | 132 | 6 | 7580778   | 7628109   | High_rec | 0 | -    | 0  | -     | 1 | 7.16 | 7621889   | 0.1  | 0.58  | 0.36 | 2 |
| GY | 133 | 6 | 8089320   | 8191938   | High_rec | 0 | -    | 2  | 5.6   | 2 | 6.24 | 8107762   | 0.09 | 0.53  | 0.36 | 2 |

GY

|    |     |   |           |           |          |    |       |     |       |     |      |           |      |       |      |   |
|----|-----|---|-----------|-----------|----------|----|-------|-----|-------|-----|------|-----------|------|-------|------|---|
| GY | 134 | 6 | 8255299   | 10338302  | Low_rec  | 1  | 5.61  | 10  | 7.48  | 7   | 7.2  | 9201138   | 0.11 | -0.53 | 0.39 | 3 |
| GY | 135 | 6 | 12258527  | 29438316  | Low_rec  | 28 | 16.62 | 421 | 17.45 | 119 | 18.7 | 18528943  | 0.28 | -0.78 | 0.31 | 6 |
| GY | 136 | 6 | 29679760  | 32076573  | Low_rec  | 0  | -     | 16  | 6.36  | 5   | 6.54 | 31649995  | 0.09 | -0.45 | 0.08 | 3 |
| GY | 137 | 6 | 33794754  | 35355137  | Low_rec  | 1  | 5.07  | 4   | 5.61  | 5   | 5.64 | 34928581  | 0.08 | -0.42 | 0.16 | 3 |
| GY | 138 | 6 | 56973134  | 57826407  | Low_rec  | 0  | -     | 0   | -     | 2   | 5.28 | 57399690  | 0.07 | -0.41 | 0.16 | 1 |
| GY | 139 | 6 | 74036547  | 74889659  | Low_rec  | 0  | -     | 0   | -     | 1   | 5.86 | 74463103  | 0.08 | -0.46 | 0.35 | 1 |
| GY | 140 | 6 | 80900227  | 81753339  | Low_rec  | 0  | -     | 1   | 5.04  | 0   | -    | 81326783  | 0.07 | 0.43  | 0.42 | 1 |
| GY | 141 | 6 | 84207133  | 84247739  | High_rec | 0  | -     | 2   | 5.03  | 0   | -    | 84227358  | 0.07 | 0.42  | 0.31 | 1 |
| GY | 142 | 6 | 84251812  | 84291819  | High_rec | 0  | -     | 1   | 5.03  | 0   | -    | 84271739  | 0.07 | 0.42  | 0.31 | 1 |
| GY | 143 | 6 | 84365211  | 84403915  | High_rec | 0  | -     | 1   | 5.02  | 0   | -    | 84384458  | 0.06 | 0.23  | 0.14 | 1 |
| GY | 144 | 6 | 84501215  | 84538901  | High_rec | 0  | -     | 0   | -     | 6   | 5.77 | 84520170  | 0.07 | 0.28  | 0.22 | 2 |
| GY | 145 | 6 | 94751983  | 94770399  | High_rec | 0  | -     | 0   | -     | 1   | 5.06 | 94761011  | 0.07 | 0.33  | 0.49 | 1 |
| GY | 146 | 6 | 97373021  | 97394265  | High_rec | 0  | -     | 1   | 5.2   | 0   | -    | 97383614  | 0.07 | -0.35 | 0.4  | 1 |
| GY | 147 | 6 | 101463249 | 101501936 | High_rec | 0  | -     | 1   | 15.04 | 0   | -    | 101482646 | 0.22 | -0.65 | 0.17 | 5 |
| GY | 148 | 6 | 106054166 | 106076380 | High_rec | 0  | -     | 0   | -     | 1   | 5.34 | 106065312 | 0.07 | 0.41  | 0.1  | 1 |
| GY | 149 | 6 | 142361290 | 143244625 | Low_rec  | 0  | -     | 3   | 5.29  | 0   | -    | 142814770 | 0.07 | -0.42 | 0.21 | 1 |
| GY | 150 | 6 | 149384192 | 149422977 | High_rec | 0  | -     | 1   | 5.18  | 0   | -    | 149403691 | 0.07 | -0.25 | 0.43 | 1 |
| GY | 151 | 6 | 155444831 | 155459067 | High_rec | 0  | -     | 1   | 5.99  | 0   | -    | 155451950 | 0.08 | 0.38  | 0.29 | 1 |
| GY | 152 | 6 | 165940796 | 165953795 | High_rec | 0  | -     | 1   | 5.31  | 1   | 5.15 | 165948837 | 0.07 | -0.36 | 0.37 | 1 |
| GY | 153 | 7 | 15194163  | 16293127  | Low_rec  | 0  | -     | 1   | 5.07  | 0   | -    | 15743645  | 0.07 | 0.33  | 0.08 | 1 |
| GY | 154 | 7 | 16398918  | 17497882  | Low_rec  | 0  | -     | 1   | 6.11  | 0   | -    | 16948400  | 0.08 | -0.4  | 0.1  | 1 |
| GY | 155 | 7 | 40878781  | 42008799  | Low_rec  | 0  | -     | 0   | -     | 10  | 6.99 | 41459217  | 0.09 | 0.26  | 0.14 | 2 |
| GY | 156 | 7 | 49084346  | 50183310  | Low_rec  | 0  | -     | 1   | 5.06  | 0   | -    | 49633828  | 0.06 | 0.24  | 0.12 | 1 |
| GY | 157 | 7 | 65846729  | 66945693  | Low_rec  | 0  | -     | 0   | -     | 1   | 5.36 | 66396211  | 0.07 | 0.24  | 0.06 | 1 |
| GY | 158 | 7 | 68774890  | 70451076  | Low_rec  | 0  | -     | 1   | 5.03  | 1   | 5.22 | 69901594  | 0.06 | 0.23  | 0.13 | 1 |
| GY | 159 | 7 | 72972521  | 75725143  | Low_rec  | 0  | -     | 1   | 5.86  | 3   | 5.53 | 75172928  | 0.07 | 0.24  | 0.14 | 2 |
| GY | 160 | 7 | 76759026  | 77858230  | Low_rec  | 2  | 5.19  | 1   | 5.35  | 0   | -    | 77308508  | 0.07 | 0.29  | 0.15 | 1 |
| GY | 161 | 7 | 91972395  | 93071359  | Low_rec  | 0  | -     | 1   | 5.02  | 0   | -    | 92521877  | 0.06 | 0.24  | 0.1  | 1 |
| GY | 162 | 7 | 124211722 | 124225680 | High_rec | 0  | -     | 1   | 6.96  | 0   | -    | 124218688 | 0.1  | 0.38  | 0.27 | 2 |
| GY | 163 | 7 | 126775251 | 126787618 | High_rec | 0  | -     | 1   | 5.53  | 0   | -    | 126781432 | 0.07 | -0.32 | 0.47 | 1 |
| GY | 164 | 7 | 126904150 | 126916485 | High_rec | 0  | -     | 0   | -     | 1   | 5.12 | 126910325 | 0.06 | -0.27 | 0.12 | 1 |
| GY | 165 | 7 | 127141936 | 127154217 | High_rec | 0  | -     | 1   | 5.18  | 0   | -    | 127148088 | 0.07 | -0.32 | 0.31 | 1 |
| GY | 166 | 7 | 128414484 | 128429337 | High_rec | 1  | 5.33  | 2   | 5.63  | 0   | -    | 128423294 | 0.07 | -0.26 | 0.4  | 2 |
| GY | 167 | 7 | 142454502 | 144297490 | Low_rec  | 0  | -     | 1   | 5.03  | 4   | 5.36 | 143024517 | 0.07 | 0.23  | 0.27 | 1 |

GY

|    |     |   |           |           |          |   |      |    |      |   |      |           |      |       |      |   |
|----|-----|---|-----------|-----------|----------|---|------|----|------|---|------|-----------|------|-------|------|---|
| GY | 168 | 7 | 156461263 | 156495261 | High_rec | 0 | -    | 1  | 5.25 | 0 | -    | 156478285 | 0.06 | 0.21  | 0.2  | 1 |
| GY | 169 | 7 | 157456005 | 157481982 | High_rec | 0 | -    | 0  | -    | 1 | 5.25 | 157468938 | 0.07 | 0.25  | 0.05 | 1 |
| GY | 170 | 7 | 162947146 | 162957010 | High_rec | 0 | -    | 0  | -    | 1 | 5.13 | 162952070 | 0.06 | 0.24  | 0.39 | 1 |
| GY | 171 | 8 | 8086623   | 8114051   | High_rec | 0 | -    | 0  | -    | 1 | 5.17 | 8100428   | 0.06 | -0.24 | 0.19 | 1 |
| GY | 172 | 8 | 10071507  | 10099203  | High_rec | 0 | -    | 0  | -    | 1 | 6.18 | 10085339  | 0.08 | -0.28 | 0.14 | 1 |
| GY | 173 | 8 | 12767198  | 12798330  | High_rec | 0 | -    | 1  | 11.8 | 0 | -    | 12782777  | 0.17 | -0.61 | 0.22 | 4 |
| GY | 174 | 8 | 12884819  | 12918012  | High_rec | 0 | -    | 3  | 5.13 | 0 | -    | 12902378  | 0.06 | 0.25  | 0.35 | 1 |
| GY | 175 | 8 | 18883292  | 18913206  | High_rec | 0 | -    | 0  | -    | 1 | 5.36 | 18898238  | 0.07 | 0.25  | 0.37 | 1 |
| GY | 176 | 8 | 19819510  | 19850796  | High_rec | 0 | -    | 0  | -    | 2 | 6.51 | 19835102  | 0.09 | -0.4  | 0.06 | 1 |
| GY | 177 | 8 | 20955086  | 20988776  | High_rec | 0 | -    | 0  | -    | 1 | 5.53 | 20971916  | 0.07 | 0.33  | 0.33 | 2 |
| GY | 178 | 8 | 21132144  | 21166359  | High_rec | 0 | -    | 1  | 5.24 | 0 | -    | 21149258  | 0.07 | 0.37  | 0.3  | 1 |
| GY | 179 | 8 | 25089644  | 25160450  | High_rec | 2 | 5.39 | 8  | 5.61 | 0 | -    | 25121123  | 0.08 | 0.36  | 0.48 | 2 |
| GY | 180 | 8 | 63113072  | 64102354  | Low_rec  | 0 | -    | 0  | -    | 1 | 5.44 | 63607713  | 0.07 | -0.32 | 0.18 | 1 |
| GY | 181 | 8 | 65290417  | 66279699  | Low_rec  | 0 | -    | 1  | 5.02 | 0 | -    | 65785058  | 0.06 | 0.33  | 0.32 | 1 |
| GY | 182 | 8 | 71139615  | 72149143  | Low_rec  | 0 | -    | 2  | 5.16 | 0 | -    | 71654502  | 0.06 | -0.21 | 0.05 | 1 |
| GY | 183 | 8 | 119919935 | 119955844 | High_rec | 1 | 5.44 | 1  | 5.44 | 0 | -    | 119937927 | 0.07 | 0.33  | 0.27 | 1 |
| GY | 184 | 8 | 122135797 | 122170300 | High_rec | 0 | -    | 1  | 5.87 | 0 | -    | 122153056 | 0.08 | -0.36 | 0.26 | 1 |
| GY | 185 | 8 | 122187760 | 122238972 | High_rec | 0 | -    | 4  | 5.87 | 0 | -    | 122205011 | 0.08 | -0.36 | 0.26 | 1 |
| GY | 186 | 8 | 123589832 | 123624559 | High_rec | 0 | -    | 2  | 5.16 | 0 | -    | 123607159 | 0.07 | -0.4  | 0.12 | 1 |
| GY | 187 | 8 | 123753971 | 123789746 | High_rec | 0 | -    | 3  | 5.19 | 0 | -    | 123772416 | 0.07 | -0.32 | 0.17 | 1 |
| GY | 188 | 8 | 123893288 | 123928641 | High_rec | 0 | -    | 1  | 5.74 | 1 | 6.35 | 123910645 | 0.08 | -0.36 | 0.14 | 1 |
| GY | 189 | 8 | 124919958 | 124955012 | High_rec | 0 | -    | 0  | -    | 3 | 5.85 | 124937480 | 0.08 | 0.4   | 0.49 | 1 |
| GY | 190 | 8 | 132992761 | 133218372 | High_rec | 0 | -    | 6  | 5.7  | 0 | -    | 133086014 | 0.07 | -0.35 | 0.07 | 1 |
| GY | 191 | 8 | 134105172 | 134206384 | High_rec | 0 | -    | 1  | 5.65 | 0 | -    | 134155603 | 0.07 | -0.37 | 0.3  | 1 |
| GY | 192 | 8 | 134789526 | 134958862 | High_rec | 1 | 5.09 | 4  | 5.09 | 0 | -    | 134845699 | 0.06 | -0.31 | 0.12 | 1 |
| GY | 193 | 8 | 135418240 | 135677825 | High_rec | 0 | -    | 5  | 6.84 | 0 | -    | 135480233 | 0.09 | 0.45  | 0.19 | 2 |
| GY | 194 | 8 | 135703068 | 135833364 | High_rec | 0 | -    | 0  | -    | 2 | 5.04 | 135767885 | 0.06 | 0.36  | 0.19 | 1 |
| GY | 195 | 8 | 137769256 | 140206204 | Low_rec  | 0 | -    | 5  | 5.41 | 4 | 5.51 | 139344593 | 0.07 | 0.35  | 0.47 | 5 |
| GY | 196 | 8 | 158547930 | 158606180 | High_rec | 0 | -    | 0  | -    | 1 | 5.53 | 158577127 | 0.07 | 0.36  | 0.29 | 1 |
| GY | 197 | 8 | 159472627 | 159526710 | High_rec | 0 | -    | 10 | 6.01 | 0 | -    | 159498761 | 0.08 | -0.28 | 0.19 | 1 |
| GY | 198 | 8 | 161894255 | 161932406 | High_rec | 0 | -    | 2  | 5.27 | 0 | -    | 161913375 | 0.07 | 0.37  | 0.4  | 1 |
| GY | 199 | 8 | 163603104 | 163633981 | High_rec | 0 | -    | 0  | -    | 2 | 5.32 | 163618559 | 0.07 | 0.31  | 0.46 | 1 |
| GY | 200 | 8 | 164738196 | 164765592 | High_rec | 0 | -    | 1  | 5.33 | 0 | -    | 164751885 | 0.07 | -0.35 | 0.34 | 1 |
| GY | 201 | 9 | 2921786   | 2941298   | High_rec | 0 | -    | 0  | -    | 1 | 5.27 | 2931541   | 0.07 | -0.32 | 0.38 | 1 |

GY

|    |     |    |           |           |          |   |      |   |      |   |      |           |      |       |      |   |
|----|-----|----|-----------|-----------|----------|---|------|---|------|---|------|-----------|------|-------|------|---|
| GY | 202 | 9  | 16238943  | 16258316  | High_rec | 0 | -    | 0 | -    | 1 | 5.27 | 16248633  | 0.07 | -0.33 | 0.14 | 1 |
| GY | 203 | 9  | 16671757  | 16692173  | High_rec | 0 | -    | 2 | 5.69 | 0 | -    | 16682172  | 0.08 | -0.36 | 0.45 | 1 |
| GY | 204 | 9  | 16710192  | 16730786  | High_rec | 0 | -    | 3 | 6.24 | 0 | -    | 16720220  | 0.09 | -0.39 | 0.43 | 1 |
| GY | 205 | 9  | 37835983  | 42569935  | Low_rec  | 0 | -    | 5 | 5.72 | 5 | 6.12 | 40746771  | 0.08 | 0.4   | 0.3  | 1 |
| GY | 206 | 9  | 86390930  | 89689635  | Low_rec  | 1 | 5.02 | 1 | 5.14 | 5 | 5.2  | 87287956  | 0.07 | 0.37  | 0.23 | 1 |
| GY | 207 | 9  | 95815538  | 99392794  | Low_rec  | 0 | -    | 1 | 5.31 | 4 | 5.58 | 98492013  | 0.08 | 0.38  | 0.38 | 1 |
| GY | 208 | 9  | 99571945  | 101781403 | Low_rec  | 0 | -    | 0 | -    | 2 | 5.48 | 100468971 | 0.07 | -0.35 | 0.45 | 2 |
| GY | 209 | 9  | 104392313 | 104477472 | High_rec | 1 | 5.03 | 2 | 5.11 | 0 | -    | 104434941 | 0.07 | -0.35 | 0.39 | 1 |
| GY | 210 | 9  | 128868662 | 130662714 | Low_rec  | 1 | 5.6  | 1 | 5.61 | 0 | -    | 129765688 | 0.08 | 0.4   | 0.19 | 1 |
| GY | 211 | 9  | 139926885 | 139957638 | High_rec | 0 | -    | 0 | -    | 1 | 5.12 | 139942270 | 0.07 | 0.36  | 0.17 | 1 |
| GY | 212 | 9  | 139999731 | 140039821 | High_rec | 0 | -    | 1 | 5    | 1 | 5.22 | 140015074 | 0.07 | 0.34  | 0.12 | 1 |
| GY | 213 | 9  | 140335136 | 140365476 | High_rec | 0 | -    | 0 | -    | 1 | 5.25 | 140350308 | 0.07 | 0.36  | 0.09 | 1 |
| GY | 214 | 9  | 149031630 | 149046185 | High_rec | 0 | -    | 1 | 5.14 | 0 | -    | 149038912 | 0.06 | -0.33 | 0.3  | 1 |
| GY | 215 | 10 | 33904568  | 35547802  | Low_rec  | 0 | -    | 1 | 5.42 | 0 | -    | 34726185  | 0.08 | -0.44 | 0.29 | 1 |
| GY | 216 | 10 | 52248577  | 54304711  | Low_rec  | 0 | -    | 5 | 5.41 | 0 | -    | 53479608  | 0.07 | -0.42 | 0.23 | 1 |
| GY | 217 | 10 | 62209598  | 63852832  | Low_rec  | 0 | -    | 0 | -    | 1 | 5.25 | 63031215  | 0.07 | 0.28  | 0.2  | 1 |
| GY | 218 | 10 | 77088709  | 77123603  | High_rec | 0 | -    | 2 | 5.5  | 0 | -    | 77104767  | 0.07 | -0.33 | 0.18 | 1 |
| GY | 219 | 10 | 77240510  | 77275071  | High_rec | 0 | -    | 1 | 5.19 | 0 | -    | 77257956  | 0.07 | -0.37 | 0.45 | 1 |
| GY | 220 | 10 | 84081728  | 84105135  | High_rec | 0 | -    | 2 | 5.24 | 0 | -    | 84093349  | 0.07 | 0.32  | 0.18 | 1 |
| GY | 221 | 10 | 84149184  | 84172339  | High_rec | 0 | -    | 1 | 5.22 | 0 | -    | 84160732  | 0.06 | 0.33  | 0.16 | 1 |
| GY | 222 | 10 | 85301075  | 85322549  | High_rec | 0 | -    | 0 | -    | 1 | 5.68 | 85311831  | 0.07 | 0.39  | 0.29 | 1 |
| GY | 223 | 10 | 88514366  | 88538160  | High_rec | 0 | -    | 0 | -    | 1 | 5.07 | 88526173  | 0.06 | 0.29  | 0.2  | 1 |
| GY | 224 | 10 | 109379358 | 111022592 | Low_rec  | 0 | -    | 0 | -    | 1 | 5.25 | 110200975 | 0.07 | 0.33  | 0.12 | 1 |
| GY | 225 | 10 | 130264415 | 130311365 | High_rec | 0 | -    | 0 | -    | 1 | 6.29 | 130287911 | 0.08 | 0.26  | 0.13 | 1 |
| GY | 226 | 10 | 130595464 | 130641967 | High_rec | 0 | -    | 2 | 7.21 | 0 | -    | 130619915 | 0.1  | 0.28  | 0.15 | 1 |
| GY | 227 | 10 | 130676908 | 130742355 | High_rec | 0 | -    | 2 | 6.08 | 0 | -    | 130698830 | 0.08 | 0.26  | 0.08 | 1 |
| GY | 228 | 10 | 130805332 | 130848072 | High_rec | 0 | -    | 0 | -    | 1 | 6.08 | 130826761 | 0.08 | 0.26  | 0.08 | 1 |
| GY | 229 | 10 | 130885191 | 130936382 | High_rec | 0 | -    | 0 | -    | 4 | 7.38 | 130907890 | 0.1  | 0.28  | 0.05 | 1 |
| GY | 230 | 10 | 131021378 | 131068694 | High_rec | 0 | -    | 2 | 5.68 | 0 | -    | 131048111 | 0.07 | 0.25  | 0.17 | 1 |
| GY | 231 | 10 | 132154387 | 132213015 | High_rec | 0 | -    | 7 | 6.1  | 4 | 6.97 | 132177648 | 0.09 | 0.27  | 0.08 | 3 |
| GY | 232 | 10 | 132228136 | 132273816 | High_rec | 0 | -    | 1 | 5.23 | 3 | 7.53 | 132256238 | 0.1  | 0.28  | 0.13 | 2 |
| GY | 233 | 10 | 132304734 | 132339887 | High_rec | 0 | -    | 0 | -    | 7 | 7.42 | 132321894 | 0.1  | 0.28  | 0.14 | 2 |
| GY | 234 | 10 | 132371273 | 132441246 | High_rec | 0 | -    | 3 | 6.16 | 2 | 6.77 | 132424337 | 0.09 | 0.27  | 0.09 | 1 |
| GY | 235 | 10 | 132491566 | 132569699 | High_rec | 0 | -    | 5 | 5.75 | 5 | 5.51 | 132508163 | 0.07 | 0.24  | 0.11 | 2 |

GY

|    |     |    |           |           |          |   |      |   |      |   |      |           |      |       |      |   |
|----|-----|----|-----------|-----------|----------|---|------|---|------|---|------|-----------|------|-------|------|---|
| GY | 236 | 10 | 134643577 | 134671978 | High_rec | 0 | -    | 1 | 5.02 | 1 | 7.43 | 134655979 | 0.1  | 0.3   | 0.49 | 1 |
| GY | 237 | 10 | 134705663 | 134730189 | High_rec | 1 | 5.04 | 0 | -    | 0 | -    | 134717915 | 0.06 | 0.25  | 0.41 | 1 |
| GY | 238 | 10 | 143161682 | 143172292 | High_rec | 0 | -    | 1 | 6.02 | 0 | -    | 143166905 | 0.08 | -0.44 | 0.1  | 1 |
