# Supplementary material for: Genotyping-by-sequencing and SNP-arrays are complementary for detecting quantitative trait loci by tagging different haplotypes in association studies
Source: bioRxiv or medRxiv preprint supplement (doi:10.1101/476598), 2019-05-24
Supplement: Supplementary file [file media-11.pdf]

**Additional file 11 (.pdf):**

**Table S6:** Description of inbred lines. Variety and accession along with the breeders, seeds providers and genetic groups obtained using ADMIXTURE for K=4 (Stiff Stalk, Iodent, Lancaster, Other).

TableS6\_Accession\_ID

| Variety_ID | Accession_ID   | Breeder                    | Seeds_Provider  | Group       |
|------------|----------------|----------------------------|-----------------|-------------|
| 11430      | 11430_usda     | Cargill                    | NCRPIS          | Iodent      |
| A3         | A3_inra        | INTA                       | INTA_Pergamino  | Other       |
| A310       | A310_inra      | University_of_Minnesota    | NCRPIS          | Other       |
| A347       | A347_inra      | University_of_Minnesota    | NCRPIS          | Other       |
| A374       | A374_inra      | University_of_Minnesota    | NCRPIS          | Other       |
| A375       | A375_inra      | University_of_Minnesota    | NCRPIS          | Other       |
| A554       | A554_inra      | University_of_Minnesota    | NCRPIS          | Other       |
| AS5707     | AS5707_usda    | Asgrow                     | NCRPIS          | Lancaster   |
| B100       | B100_uh        | Iowa_State_University      | NCRPIS          | Lancaster   |
| B104       | B104_inra      | Iowa_State_University      | NCRPIS          | Stiff_Stalk |
| B105       | B105_inra      | Iowa_State_University      | NCRPIS          | Other       |
| B106       | B106_inra      | Iowa_State_University      | NCRPIS          | Other       |
| B107       | B107_inra      | Iowa_State_University      | NCRPIS          | Iodent      |
| B108       | B108_uh        | Iowa_State_University      | NCRPIS          | Other       |
| B109       | B109_uh        | Iowa_State_University      | NCRPIS          | Stiff_Stalk |
| B110       | B110_uh        | Iowa_State_University      | NCRPIS          | Stiff_Stalk |
| B113       | B113_uh        | Iowa_State_University      | NCRPIS          | Other       |
| B14a       | B14a_inra      | Iowa_State_University      | NCRPIS          | Stiff_Stalk |
| B37        | B37_inra       | Iowa_State_University      | NCRPIS          | Other       |
| B73        | B73_inra       | Iowa_State_University      | NCRPIS          | Stiff_Stalk |
| B84        | B84_inra       | Iowa_State_University      | NCRPIS          | Stiff_Stalk |
| B89        | B89_inra       | Iowa_State_University      | NCRPIS          | Other       |
| B97        | B97_usa        | Iowa_State_University      | NCRPIS          | Other       |
| B98        | B98_uh         | Iowa_State_University      | NCRPIS          | Other       |
| CO109      | CO109_inra     | Agriculture_Canada_Ottawa  | NCRPIS          | Other       |
| CR1Ht      | CR1Ht_usda     | J.C._Robinson_Seed_Company | NCRPIS          | Lancaster   |
| D09        | D09_uh         | University_of_Hohenheim    | UHOH            | Other       |
| DE811      | DE811_inra     | University_of_Delaware     | NCRPIS          | Stiff_Stalk |
| DK4676A    | DK4676A_usda   | Dekalb                     | NCRPIS          | Stiff_Stalk |
| DK78010    | DK78010_usda   | Dekalb                     | NCRPIS          | Stiff_Stalk |
| DK78371A   | DK78371A_usda  | Dekalb                     | NCRPIS          | Lancaster   |
| DKFAPW     | DKFAPW_usda    | Dekalb                     | NCRPIS          | Stiff_Stalk |
| DKFBHJ     | DKFBHJ_usda    | Dekalb                     | NCRPIS          | Stiff_Stalk |
| DKIBO2     | DKIBO2_usda    | Dekalb                     | NCRPIS          | Iodent      |
| DKMBST     | DKMBST_usda    | Dekalb                     | NCRPIS          | Lancaster   |
| EA1027     | EM1027_inra    | CSIC_Alcalá                | CSIC_Pontevedra | Other       |
| EA1163     | EM1163_inra    | CSIC_Alcalá                | CSIC_Pontevedra | Other       |
| EA3076     | EA3076_csic    | CSIC_Alcalá                | CSIC_Pontevedra | Other       |
| EC136      | EC136_ciam     | CIAM_Coruña                | CIAM            | Stiff_Stalk |
| EC140      | EC140_ciam     | CIAM_Coruña                | CIAM            | Stiff_Stalk |
| EC151      | EC151_ciam     | CIAM_Coruña                | CIAM            | Stiff_Stalk |
| EC169      | EC169_ciam     | CIAM_Coruña                | CIAM            | Stiff_Stalk |
| EC175      | EC175_ciam     | CIAM_Coruña                | CIAM            | Stiff_Stalk |
| EC232      | EC232_ciam     | CIAM_Coruña                | CIAM            | Other       |
| EC242C     | EC242C_ciam    | CIAM_Coruña                | CIAM            | Iodent      |
| EC334      | EC334_ciam     | CIAM_Coruña                | CIAM            | Other       |
| EP10       | EP10_csic      | CSIC_Pontevedra            | CSIC_Pontevedra | Other       |
| EP2008-18  | EP2008-18_csic | CSIC_Pontevedra            | CSIC_Pontevedra | Lancaster   |
| EP2008-22  | EP2008-22_csic | CSIC_Pontevedra            | CSIC_Pontevedra | Lancaster   |
| EP29       | EP29_csic      | CSIC_Pontevedra            | CSIC_Pontevedra | Other       |
| EP51       | EP51_csic      | CSIC_Pontevedra            | CSIC_Pontevedra | Other       |

## TableS6\_Accession\_ID

|        |             |                 |                 |             |
|--------|-------------|-----------------|-----------------|-------------|
| EP52   | EP52_csic   | CSIC_Pontevedra | CSIC_Pontevedra | Other       |
| EP55   | EP55_csic   | CSIC_Pontevedra | CSIC_Pontevedra | Other       |
| EP67   | EP67_csic   | CSIC_Pontevedra | CSIC_Pontevedra | Other       |
| EP72   | EP72_csic   | CSIC_Pontevedra | CSIC_Pontevedra | Other       |
| EP77   | EP77_csic   | CSIC_Pontevedra | CSIC_Pontevedra | Other       |
| EZ11A  | EZ11A_csic  | CSIC_Zaragoza   | CSIC_Pontevedra | Other       |
| EZ18   | EZ18_csic   | CSIC_Zaragoza   | CSIC_Pontevedra | Other       |
| EZ31   | EZ31_csic   | CSIC_Zaragoza   | CSIC_Pontevedra | Stiff_Stalk |
| EZ34   | EZ34_csic   | CSIC_Zaragoza   | CSIC_Pontevedra | Lancaster   |
| EZ35   | EZ35_csic   | CSIC_Zaragoza   | CSIC_Pontevedra | Other       |
| EZ36   | EZ36_csic   | CSIC_Zaragoza   | CSIC_Pontevedra | Other       |
| EZ37   | EZ37_csic   | CSIC_Zaragoza   | CSIC_Pontevedra | Stiff_Stalk |
| EZ38   | EZ38_csic   | CSIC_Zaragoza   | CSIC_Pontevedra | Other       |
| EZ40   | EZ40_csic   | CSIC_Zaragoza   | CSIC_Pontevedra | Stiff_Stalk |
| EZ42   | EZ42_csic   | CSIC_Zaragoza   | CSIC_Pontevedra | Stiff_Stalk |
| EZ47   | EZ47_csic   | CSIC_Zaragoza   | CSIC_Pontevedra | Other       |
| EZ48   | EZ48_csic   | CSIC_Zaragoza   | CSIC_Pontevedra | Stiff_Stalk |
| F04401 | F04401_inra | INRA            | Agri_Obtentions | lodent      |
| F04402 | F04402_inra | INRA            | Agri_Obtentions | lodent      |
| F04701 | F04701_inra | INRA            | Agri_Obtentions | Lancaster   |
| F04702 | F04702_inra | INRA            | Agri_Obtentions | Lancaster   |
| F05101 | F05101_inra | INRA            | Agri_Obtentions | Stiff_Stalk |
| F05404 | F05404_inra | INRA            | Agri_Obtentions | lodent      |
| F1808  | F1808_inra  | INRA            | Agri_Obtentions | Stiff_Stalk |
| F1890  | FC1890_inra | INRA            | Agri_Obtentions | lodent      |
| F218   | FV218_inra  | INRA            | Agri_Obtentions | Other       |
| F252   | FV252_inra  | INRA            | Agri_Obtentions | Other       |
| F353   | FV353_inra  | INRA            | Agri_Obtentions | lodent      |
| F354   | FV354_inra  | INRA            | Agri_Obtentions | Other       |
| F608   | F608_inra   | INRA            | Agri_Obtentions | Other       |
| F618   | F618_inra   | INRA            | Agri_Obtentions | Other       |
| F7001  | F7001_inra  | INRA            | Agri_Obtentions | Other       |
| F7019  | F7019_inra  | INRA            | Agri_Obtentions | Other       |
| F7025  | F7025_inra  | INRA            | Agri_Obtentions | Stiff_Stalk |
| F7028  | F7028_inra  | INRA            | Agri_Obtentions | Other       |
| F7057  | F7057_inra  | INRA            | Agri_Obtentions | Other       |
| F7058  | F7058_inra  | INRA            | Agri_Obtentions | Other       |
| F7081  | F7081_inra  | INRA            | Agri_Obtentions | Other       |
| F7082  | F7082_inra  | INRA            | Agri_Obtentions | Other       |
| F712   | F712_inra   | INRA            | Agri_Obtentions | Other       |
| F748   | F748_inra   | INRA            | Agri_Obtentions | Lancaster   |
| F752   | F752_inra   | INRA            | Agri_Obtentions | Other       |
| F816   | F816_inra   | INRA            | Agri_Obtentions | Lancaster   |
| F838   | F838_inra   | INRA            | Agri_Obtentions | Other       |
| F874   | F874_inra   | INRA            | Agri_Obtentions | Other       |
| F888   | F888_inra   | INRA            | Agri_Obtentions | Other       |
| F894   | F894_inra   | INRA            | Agri_Obtentions | Other       |
| F908   | F908_inra   | INRA            | Agri_Obtentions | Other       |
| F912   | F912_inra   | INRA            | Agri_Obtentions | lodent      |
| F918   | F918_inra   | INRA            | Agri_Obtentions | Other       |
| F922   | F922_inra   | INRA            | Agri_Obtentions | Other       |
| F924   | F924_inra   | INRA            | Agri_Obtentions | Stiff_Stalk |
| F98902 | F98902_inra | INRA            | Agri_Obtentions | lodent      |

TableS6\_Accession\_ID

| FP1     | FP1_inra            | INRA                  | Agri_Obtentions       | Other       |
|---------|---------------------|-----------------------|-----------------------|-------------|
| FR697   | FR697_ifsi          | IFSI                  | SGI                   | Lancaster   |
| H99     | H99_inra            | Purdue_University_AG  | NCRPIS                | Lancaster   |
| HMV5301 | HMV5301_Martonvasar | MTA_ATK               | MTA_ATK_Martonvásár   | Iodent      |
| HMV5325 | HMV5325_Martonvasar | MTA_ATK               | MTA_ATK_Martonvásár   | Stiff_Stalk |
| HMV5343 | HMV5343_Martonvasar | MTA_ATK               | MTA_ATK_Martonvásár   | Stiff_Stalk |
| HMV5347 | HMV5347_Martonvasar | MTA_ATK               | MTA_ATK_Martonvásár   | Stiff_Stalk |
| HMV5405 | HMV5405_Martonvasar | MTA_ATK               | MTA_ATK_Martonvásár   | Iodent      |
| HMV5409 | HMV5409_Martonvasar | MTA_ATK               | MTA_ATK_Martonvásár   | Other       |
| HMV5422 | HMV5422_Martonvasar | MTA_ATK               | MTA_ATK_Martonvásár   | Stiff_Stalk |
| HMV5502 | HMV5502_Martonvasar | MTA_ATK               | MTA_ATK_Martonvásár   | Iodent      |
| I198    | I198_inra           | Iowa_State_University | NCRPIS                | Other       |
| I205    | I205_inra           | Iowa_State_University | NCRPIS                | Other       |
| I211    | I211_inra           | Iowa_State_University | INRA_not_in_NCRPIS    | Other       |
| I238    | I238_inra           | Iowa_State_University | INRA_not_in_NCRPIS    | Other       |
| I242    | I242_inra           | Iowa_State_University | INRA_not_in_NCRPIS    | Other       |
| I261    | I261_inra           | Iowa_State_University | INRA_not_in_NCRPIS    | Other       |
| I267    | I267_inra           | Iowa_State_University | INRA_not_in_NCRPIS    | Other       |
| IDT     | IDT_inra            | Iowa_State_University | INRA_not_in_NCRPIS    | Other       |
| LAN496  | LAN496_inra         | Iowa_State_University | Iowa_State_University | Other       |
| LH123Ht | LH123Ht_usda        | Holden's              | NCRPIS                | Lancaster   |
| LH145   | LH145_usda          | Holden's              | NCRPIS                | Stiff_Stalk |
| LH39    | LH39_usda           | Holden's              | NCRPIS                | Lancaster   |
| LH59    | LH59_usda           | Holden's              | NCRPIS                | Lancaster   |
| LH60    | LH60_usda           | Holden's              | NCRPIS                | Lancaster   |
| LH65    | LH65_usda           | Holden's              | NCRPIS                | Lancaster   |
| LH74    | LH74_inra           | Holden's              | NCRPIS                | Stiff_Stalk |
| LH82    | LH82_inra           | Holden's              | NCRPIS                | Other       |
| LH93    | LH93_usda           | Holden's              | NCRPIS                | Other       |
| Lo1016  | Lo1016_bergamo      | CRA_MAC               | CRA_MAC_Bergamo       | Stiff_Stalk |
| Lo1026  | Lo1026_bergamo      | CRA_MAC               | CRA_MAC_Bergamo       | Stiff_Stalk |
| Lo1035  | Lo1035_bergamo      | CRA_MAC               | CRA_MAC_Bergamo       | Lancaster   |
| Lo1038  | Lo1038_bergamo      | CRA_MAC               | CRA_MAC_Bergamo       | Other       |
| Lo1056  | Lo1056_bergamo      | CRA_MAC               | CRA_MAC_Bergamo       | Lancaster   |
| Lo1063  | Lo1063_bergamo      | CRA_MAC               | CRA_MAC_Bergamo       | Stiff_Stalk |
| Lo1087  | Lo1087_bergamo      | CRA_MAC               | CRA_MAC_Bergamo       | Stiff_Stalk |
| Lo1094  | Lo1094_bergamo      | CRA_MAC               | CRA_MAC_Bergamo       | Stiff_Stalk |
| Lo1095  | Lo1095_bergamo      | CRA_MAC               | CRA_MAC_Bergamo       | Iodent      |
| Lo1101  | Lo1101_bergamo      | CRA_MAC               | CRA_MAC_Bergamo       | Stiff_Stalk |
| Lo1106  | Lo1106_bergamo      | CRA_MAC               | CRA_MAC_Bergamo       | Stiff_Stalk |
| Lo1123  | Lo1123_bergamo      | CRA_MAC               | CRA_MAC_Bergamo       | Iodent      |
| Lo1124  | Lo1124_bergamo      | CRA_MAC               | CRA_MAC_Bergamo       | Lancaster   |
| Lo1130  | Lo1130_bergamo      | CRA_MAC               | CRA_MAC_Bergamo       | Iodent      |
| Lo1172  | Lo1172_bergamo      | CRA_MAC               | CRA_MAC_Bergamo       | Other       |
| Lo1180  | Lo1180_bergamo      | CRA_MAC               | CRA_MAC_Bergamo       | Iodent      |
| Lo1187  | Lo1187_bergamo      | CRA_MAC               | CRA_MAC_Bergamo       | Stiff_Stalk |
| Lo1199  | Lo1199_bergamo      | CRA_MAC               | CRA_MAC_Bergamo       | Stiff_Stalk |
| Lo1203  | Lo1203_bergamo      | CRA_MAC               | CRA_MAC_Bergamo       | Lancaster   |
| Lo1223  | Lo1223_bergamo      | CRA_MAC               | CRA_MAC_Bergamo       | Stiff_Stalk |
| Lo1242  | Lo1242_bergamo      | CRA_MAC               | CRA_MAC_Bergamo       | Lancaster   |
| Lo1251  | Lo1251_bergamo      | CRA_MAC               | CRA_MAC_Bergamo       | Stiff_Stalk |
| Lo1253  | Lo1253_bergamo      | CRA_MAC               | CRA_MAC_Bergamo       | Stiff_Stalk |
| Lo1261  | Lo1261_bergamo      | CRA_MAC               | CRA_MAC_Bergamo       | Stiff_Stalk |

TableS6\_Accession\_ID

|        |                |                                           |                                                |             |
|--------|----------------|-------------------------------------------|------------------------------------------------|-------------|
| Lo1266 | Lo1266_bergamo | CRA_MAC                                   | CRA_MAC_Bergamo                                | Iodent      |
| Lo1270 | Lo1270_bergamo | CRA_MAC                                   | CRA_MAC_Bergamo                                | Lancaster   |
| Lo1273 | Lo1273_bergamo | CRA_MAC                                   | CRA_MAC_Bergamo                                | Iodent      |
| Lo1274 | Lo1274_bergamo | CRA_MAC                                   | CRA_MAC_Bergamo                                | Lancaster   |
| Lo1280 | Lo1280_bergamo | CRA_MAC                                   | CRA_MAC_Bergamo                                | Lancaster   |
| Lo1282 | Lo1282_bergamo | CRA_MAC                                   | CRA_MAC_Bergamo                                | Lancaster   |
| Lo1284 | Lo1284_bergamo | CRA_MAC                                   | CRA_MAC_Bergamo                                | Lancaster   |
| Lo1288 | Lo1288_bergamo | CRA_MAC                                   | CRA_MAC_Bergamo                                | Lancaster   |
| Lo1290 | Lo1290_bergamo | CRA_MAC                                   | CRA_MAC_Bergamo                                | Lancaster   |
| Lo1301 | Lo1301_bergamo | CRA_MAC                                   | CRA_MAC_Bergamo                                | Stiff_Stalk |
| Lo904  | Lo904_bergamo  | CRA_MAC                                   | CRA_MAC_Bergamo                                | Stiff_Stalk |
| Lp5    | Lp5_usda       | Claeys                                    | NCRPIS                                         | Stiff_Stalk |
| ML606  | ML606_usda     | United_Agriseeds                          | NCRPIS                                         | Lancaster   |
| Mo15W  | Mo15W_inra     | Missouri                                  | NCRPIS                                         | Other       |
| Mo17   | Mo17_inra      | Missouri                                  | NCRPIS                                         | Lancaster   |
| MS153  | MS153_inra     | Michigan_State_University                 | NCRPIS                                         | Other       |
| MS71   | MS71_uh        | Michigan_State_University                 | NCRPIS                                         | Other       |
| N16    | N16_inra       | University_of_Nebraska                    | University_of_Nebraska                         | Other       |
| N192   | N192_usa       | University_of_Nebraska                    | NCRPIS                                         | Stiff_Stalk |
| N22    | N22_inra       | University_of_Nebraska                    | University_of_Nebraska                         | Other       |
| N25    | N25_inra       | University_of_Nebraska                    | University_of_Nebraska                         | Other       |
| N6     | N6_inra        | University_of_Nebraska                    | NCRPIS                                         | Other       |
| NC290  | NC290_uh       | North_Carolina_University                 | NCRPIS                                         | Lancaster   |
| NC358  | NC358_uh       | North_Carolina_University                 | NCRPIS                                         | Other       |
| NDB8   | NDB8_inra      | North_Dakota_University                   | NCRPIS                                         | Other       |
| NK764  | NK764_usda     | Novartis                                  | NCRPIS                                         | Stiff_Stalk |
| NK807  | NK807_usda     | Novartis                                  | NCRPIS                                         | Other       |
| NQ508  | NQ508_usda     | United_Agriseeds                          | NCRPIS                                         | Iodent      |
| NS501  | NS501_usda     | United_Agriseeds                          | NCRPIS                                         | Iodent      |
| NS701  | NS701_usda     | Dow_Elanco                                | NCRPIS                                         | Stiff_Stalk |
| Oh02   | Oh02_inra      | Ohio_Agric_Station                        | New_Mexico_State_University<br>(Richard_Pratt) | Other       |
| Oh33   | Oh33_inra      | Ohio_Sate_University                      | NCRPIS                                         | Other       |
| Oh40B  | Oh40B_inra     | Ohio_Sate_University                      | NCRPIS                                         | Lancaster   |
| Oh43   | Oh43_inra      | Ohio_Sate_University                      | NCRPIS                                         | Lancaster   |
| Os426  | Os426_inra     | Iowa_State_University                     | NCRPIS                                         | Other       |
| P465P  | P465P_inra     | INTA                                      | INTA_Pergamino                                 | Other       |
| Pa35   | Pa35_inra      | Pennsylvania_State_University             | Pennsylvania_State_University<br>not_in_NCRPIS | Other       |
| Pa36   | Pa36_inra      | Pennsylvania_State_University             | NCRPIS                                         | Other       |
| Pa405  | Pa405_uh       | Pennsylvania_State_University             | NCRPIS                                         | Other       |
| Pa91   | Pa91_inra      | Pennsylvania_State_University             | NCRPIS                                         | Other       |
| PB116  | PB116_inra     | Banco_Portugues_de<br>Germoplasma_Vegetal | BPGV_Braga                                     | Other       |
| PB98TR | PB98TR_inra    | Banco_Portugues_de<br>Germoplasma_Vegetal | BPGV_Braga                                     | Other       |
| PH207  | PH207_usda     | Pioneer                                   | NCRPIS                                         | Iodent      |
| PHB09  | PHB09_usda     | Pioneer                                   | NCRPIS                                         | Stiff_Stalk |
| PHG35  | PHG35_usda     | Pioneer                                   | NCRPIS                                         | Iodent      |
| PHG47  | PHG47_usda     | Pioneer                                   | NCRPIS                                         | Lancaster   |
| PHG80  | PHG80_usda     | Pioneer                                   | NCRPIS                                         | Stiff_Stalk |
| PHG83  | PHG83_usda     | Pioneer                                   | NCRPIS                                         | Iodent      |
| PHG84  | PHG84_usda     | Pioneer                                   | NCRPIS                                         | Lancaster   |
| PHG86  | PHG86_usda     | Pioneer                                   | NCRPIS                                         | Stiff_Stalk |
| PHH93  | PHH93_usda     | Pioneer                                   | NCRPIS                                         | Iodent      |
| PHJ40  | PHJ40_usda     | Pioneer                                   | NCRPIS                                         | Lancaster   |

TableS6\_Accession\_ID

|           |               |                                            |                                                     |             |
|-----------|---------------|--------------------------------------------|-----------------------------------------------------|-------------|
| PHK29     | PHK29_usda    | Pioneer                                    | NCRPIS                                              | Stiff_Stalk |
| PHK76     | PHK76_usda    | Pioneer                                    | NCRPIS                                              | Lancaster   |
| PHR36     | PHR36_usda    | Pioneer                                    | NCRPIS                                              | Other       |
| PHT77     | PHT77_usda    | Pioneer                                    | NCRPIS                                              | Lancaster   |
| PHV63     | PHV63_usda    | Pioneer                                    | NCRPIS                                              | Stiff_Stalk |
| PHW65     | PHW65_usda    | Pioneer                                    | NCRPIS                                              | Lancaster   |
| PHZ51     | PHZ51_usda    | Pioneer                                    | NCRPIS                                              | Lancaster   |
| PP147     | PP147_inra    | Banco_Portugues_de_Germopla<br>sma_Vegetal | BPGV_Braga<br>CIMMYT_Kenya<br>(Boddupalli_Prasanna) | Other       |
| SC-Malawi | SC-Malawi_cim | CIMMYT                                     |                                                     | Other       |
| SGI061    | SGI061_ifsi   | SGI                                        | SGI                                                 | Ident       |
| UH_2500   | UH_2500_uh    | University_of_Hohenheim                    | UHOH                                                | Other       |
| UH_6102   | UH_6102_uh    | University_of_Hohenheim                    | UHOH                                                | Ident       |
| UH_6179   | UH_6179_uh    | University_of_Hohenheim                    | UHOH                                                | Ident       |
| UH_P024   | UH_P024_uh    | University_of_Hohenheim                    | UHOH                                                | Ident       |
| UH_P060   | UH_P060_uh    | University_of_Hohenheim                    | UHOH                                                | Ident       |
| UH_P064   | UH_P064_uh    | University_of_Hohenheim                    | UHOH                                                | Ident       |
| UH_P074   | UH_P074_uh    | University_of_Hohenheim                    | UHOH                                                | Ident       |
| UH_P087   | UH_P087_uh    | University_of_Hohenheim                    | UHOH                                                | Ident       |
| UH_P089   | UH_P089_uh    | University_of_Hohenheim                    | UHOH                                                | Ident       |
| UH_P104   | UH_P104_uh    | University_of_Hohenheim                    | UHOH                                                | Other       |
| UH_P115   | UH_P115_uh    | University_of_Hohenheim                    | UHOH                                                | Ident       |
| UH_P128   | UH_P128_uh    | University_of_Hohenheim                    | UHOH                                                | Ident       |
| UH_P148   | UH_P148_uh    | University_of_Hohenheim                    | UHOH                                                | Ident       |
| UH_S018   | UH_S018_uh    | University_of_Hohenheim                    | UHOH                                                | Other       |
| UH_S020   | UH_S020_uh    | University_of_Hohenheim                    | UHOH                                                | Other       |
| UH_S025   | UH_S025_uh    | University_of_Hohenheim                    | UHOH                                                | Other       |
| UH250     | UH250_uh      | University_of_Hohenheim                    | UHOH                                                | Other       |
| UH304     | UH304_uh      | University_of_Hohenheim                    | UHOH                                                | Ident       |
| Va26      | Va26_inra     | Virginia_Tech_University                   | NCRPIS                                              | Lancaster   |
| W117      | W117_inra     | University_of_Wisconsin                    | NCRPIS                                              | Other       |
| W182E     | W182E_inra    | University_of_Wisconsin                    | NCRPIS                                              | Other       |
| W23       | W23_uh        | University_of_Wisconsin                    | NCRPIS                                              | Other       |
| W602S     | W602S_uh      | University_of_Wisconsin                    | Univ_Wisc_(Natalia_de_Leon)                         | Lancaster   |
| W604S     | W604S_uh      | University_of_Wisconsin                    | Univ_Wisc_(Natalia_de_Leon)                         | Lancaster   |
| W64A      | W64A_inra     | University_of_Wisconsin                    | NCRPIS                                              | Other       |
| W9        | W9_inra       | University_of_Wisconsin                    | NCRPIS                                              | Other       |
| W95115    | W95115_inra   | University_of_Wisconsin                    | Univ_Wisc_(Natalia_de_Leon)                         | Other       |
| Wf9       | Wf9_inra      | Purdue_University_AG                       | NCRPIS                                              | Other       |
